# Supplementary material for: Quantitative Proteomics Analysis Reveals the Function of the Putative Ester Cyclase UvEC1 in the Pathogenicity of the Rice False Smut Fungus Ustilaginoidea virens
Source: Int J Mol Sci. 2021 Apr 15;22(8):4069. doi: 10.3390/ijms22084069 (PMC8071170; doi:10.3390/ijms22084069)
Supplement: Supplementary file 1 [file ijms-22-04069-s001.zip]

Archive with 4 entries (4 files):
- ijms-1183058 -supplementary figures.pdf
- ijms-1183058-supplementary table S1.xlsx
- ijms-1183058-supplementary table S2.xlsx
- ijms-1183058-supplementary table S3.xlsx
