# Supplementary material for: Quantitative Proteomics Analysis Reveals the Function of the Putative Ester Cyclase UvEC1 in the Pathogenicity of the Rice False Smut Fungus Ustilaginoidea virens
Source: Int J Mol Sci. 2021 Apr 15;22(8):4069. doi: 10.3390/ijms22084069 (PMC8071170; doi:10.3390/ijms22084069)
Supplement: Supplementary file 1 [file ijms-22-04069-s001.zip › ijms-1183058-supplementary table S1.xlsx]

## Sheet: Sheet1
Table S1. Primers used in this study.
Primer	Sequence (5’-3’)	Primer	Sequence (5’-3’)
F1F	CGGGGTACCCTGCCTGAGCCTGGAGAG	F1R	CCGCTCGAGTGAAGGGATGGTTGTTGG
F2F	CGCGGATCCTCGGGCAATGTATGACGC	F2R	GCTCTAGATTCCTTCTTCGAACATCT
P1	ATGGCTGCGCGCTCTTTG	P2	TCACGCATCCGCATCGCC
P3	CCCAAGCTTCGAACTAAGTCTGCCCA	P4	GGAATTCCGCATCCGCATCGCCTG
P5	CATTTGCGCCTTTAGTTC	P6	GGCAAAGGAATAGAGTAGAT
P7	TGGACGACTAAACCAAAATAG	P8	AGTCCGAGGAGGATTTGC
Probe1F	CGGGGTACCCTGCCTGAGCCTGGAGAG	Probe1R	CCGCTCGAGTGAAGGGATGGTTGTTGG
a1980F	TCACAAGGCTCCCCGAAC	a1980R	CTTGTACTGGCCAATGGG
a3251F	ATGATCCACGGCCTCG	a3251R	CAAAAGGGACAGCAAGCG
a5686F	CGCGCTCCGTCATAAACA	a5686R	GACCTTCCAGTACCTGCT
a7527F	CAGCAAGCAAGCCGCACC	a7527R	GAGGTGCGAGAACAGAGC
a6937F	CGGGCCTTAGTAAAGTGC	a6937R	TCGGGCAATTTGTTGGAG
a7087F	GGCCTAACACCTCGCACA	a7087R	AATCTACGTGCTTGAGGG
a6705F	CATTGCCGTCATTGGCCT	a6705R	CCGACTTGTCATGGTCGC
a1756F	CCCGAGGAAGCAGGTTCC	a1756R	GAGAACTGCCCCCCATTG
a5056F	GACGAAGCCTGGAGGAAG	a5056R	GACCAAGGCGACCTGGAT
a2086F	ACCAGTCGTTCGTGTACG	a2086R	AAGCTCTACGACAGCGGA
a2087F	AACATCCTGGGCTTCAGG	a2087R	ATCAGCTGGGGAGACTGC
a2088F	GGCTCAACATTCTTGACG	a2088R	CCTGTCCAAGCTTGTCAC
a2083F	TGGTCATGGACCTCAGCA	a2083R	CAATGACCTGGTTGGGAG
a2090F	ACAGCTCGTTGTGGAGAA	a2090R	CGTCATTGTCAACATGGC
a2091F	GTGTGTGCGTGTCATGGG	a2091R	AACGCAGCCAGACTGTAT
a4095F	GCGGCCCTTCTTCAAGGG	a4095R	AGGCTGGGGAAGGACTTC
Notes:
a Primers of RT-qPCR were used to detect the expression level of related genes.
