# Supplementary material for: Quantitative Proteomics Analysis Reveals the Function of the Putative Ester Cyclase UvEC1 in the Pathogenicity of the Rice False Smut Fungus Ustilaginoidea virens
Source: Int J Mol Sci. 2021 Apr 15;22(8):4069. doi: 10.3390/ijms22084069 (PMC8071170; doi:10.3390/ijms22084069)
Supplement: Supplementary file 1 [file ijms-22-04069-s001.zip › ijms-1183058-supplementary table S2.xlsx]

## Sheet: 1
Accession	Description	Score	Coverage	# Proteins	# Unique Peptides	# Peptides	# PSMs	WT-1/ref	WT-2/ref	WT-3/ref	UvEC1-1/ref	UvEC1-2/ref	UvEC1-3/ref	# AAs	MW [kDa]	calc. pI	Ratio(UvEC1/WT)	Pvalue(UvEC1/WT)
UV8b_5559	[locus_tag=UV8b_5559] [protein=ATP synthase alpha chain precursor] [protein_id=KDB13461.1] [location=join(13861..13932,14307..14464,14595..14651,14735..14855,14930..15395,15617..16137,16211..16474)] [gbkey=CDS] - [JHTR01000031.1_prot_KDB13461.1_5559]	3177.84	29.71	1	15	16	128	0.983922	0.983141	0.996017	1.00172	1.02142	1.00886	552	59.5625	9.26123	1.02326	0.031943
UV8b_1646	[locus_tag=UV8b_1646] [protein=translation elongation factor 1 alpha] [protein_id=KDB17762.1] [location=complement(join(887609..888717,888782..888920,889461..889502))] [gbkey=CDS] - [JHTR01000005.1_prot_KDB17762.1_1646]	3132.25	54.78	1	19	20	235	1.0334	1.04074	1.04391	0.945332	0.946872	0.968279	429	46.3994	9.15869	0.917399	0.000434294
UV8b_700	[locus_tag=UV8b_700] [protein=glyceraldehyde-3-phosphate dehydrogenase] [protein_id=KDB18458.1] [location=605766..606647] [gbkey=CDS] - [JHTR01000002.1_prot_KDB18458.1_700]	2794.18	73.38	1	21	21	153	0.990643	0.982306	1.08834	0.94658	1.0267	0.967315	293	31.2851	8.26514	0.960573	0.388826
UV8b_5222	[locus_tag=UV8b_5222] [protein=cobalamin-independent methionine synthase] [protein_id=KDB13888.1] [location=complement(join(189062..191131,191191..191348,191429..191501))] [gbkey=CDS] - [JHTR01000028.1_prot_KDB13888.1_5222]	2743.25	50.65	1	36	36	169	1.03668	1.03103	1.07639	0.94023	0.96349	0.929576	766	85.8195	6.94678	0.901148	0.00402352
UV8b_1180	[locus_tag=UV8b_1180] [protein=adenosylhomocysteinase] [protein_id=KDB17813.1] [location=complement(86591..87940)] [gbkey=CDS] - [JHTR01000004.1_prot_KDB17813.1_1180]	2727.33	42.54	1	18	18	119	0.988458	1.03866	1.11416	0.912493	1.00532	0.958475	449	48.7859	6.29053	0.915644	0.123014
UV8b_5049	[locus_tag=UV8b_5049] [protein=putative bleomycin hydrolase] [protein_id=KDB14060.1] [location=complement(join(192988..193014,193553..194786,195057..195379,195973..196547,196619..196932,197445..197745,197805..198118,198179..198291))] [gbkey=CDS] - [JHTR01000026.1_prot_KDB14060.1_5049]	2585.3	34.62	1	27	27	134	0.944997	0.934374	0.984228	1.03108	1.09454	1.02764	1066	119.145	7.48877	1.10115	0.0219276
UV8b_7086	[locus_tag=UV8b_7086] [protein=hypothetical protein] [protein_id=KDB12093.1] [location=complement(join(154819..155963,156035..156186,156257..156952,157015..157064))] [gbkey=CDS] - [JHTR01000051.1_prot_KDB12093.1_7086]	2560.51	34.26	1	22	22	142	0.934093	0.92198	0.9212	1.0959	1.07716	1.08371	680	74.0301	6.59521	1.17265	2.05439e-05
UV8b_5263	[locus_tag=UV8b_5263] [protein=ATP-citrate synthase subunit 1] [protein_id=KDB13929.1] [location=complement(join(311633..313162,313343..313795))] [gbkey=CDS] - [JHTR01000028.1_prot_KDB13929.1_5263]	2505.42	54.39	1	29	29	161	0.97647	0.981439	0.998261	1.01691	1.01689	0.999714	660	72.1193	8.38232	1.02616	0.0419016
UV8b_555	[locus_tag=UV8b_555] [protein=heat shock protein 70] [protein_id=KDB18313.1] [location=complement(join(165443..166656,166725..167484))] [gbkey=CDS] - [JHTR01000002.1_prot_KDB18313.1_555]	2502.66	54.64	1	33	36	187	0.984051	1.01479	1.0124	0.973466	1.01195	1.00092	657	71.5293	5.21143	0.991729	0.611956
UV8b_5927	[locus_tag=UV8b_5927] [protein=elongation factor 2] [protein_id=KDB13167.1] [location=join(112204..112211,112558..113290,113402..115177,115267..115284)] [gbkey=CDS] - [JHTR01000034.1_prot_KDB13167.1_5927]	2411.42	41.47	1	31	31	150	1.01176	1.02536	1.03829	0.956925	0.989929	0.974785	844	93.3116	7.07861	0.95	0.0137991
UV8b_3926	[locus_tag=UV8b_3926] [protein=elongation factor 3] [protein_id=KDB15263.1] [location=join(579620..579771,580090..583046,583139..583194)] [gbkey=CDS] - [JHTR01000017.1_prot_KDB15263.1_3926]	2399.64	35.96	1	35	35	133	1.00147	1.00891	1.00753	0.986957	1.00286	1.00215	1054	116.932	6.07471	0.991402	0.201628
UV8b_2665	[locus_tag=UV8b_2665] [protein=putative 60S ribosomal protein L4] [protein_id=KDB16630.1] [location=join(572826..573030,573289..573439,573540..574242)] [gbkey=CDS] - [JHTR01000010.1_prot_KDB16630.1_2665]	2315.54	60.8	1	17	17	99	1.03521	1.03052	1.05035	0.933783	0.941154	0.954012	352	37.9602	10.8286	0.907854	0.000340101
UV8b_1457	[locus_tag=UV8b_1457] [protein=Tubulin alpha chain] [protein_id=KDB17573.1] [location=complement(join(296890..297115,297175..297598,297671..298201,298320..298395,298489..298515,298597..298637,298737..298761))] [gbkey=CDS] - [JHTR01000005.1_prot_KDB17573.1_1457]	2299.23	42.09	1	15	16	116	1.01566	1.01891	0.978312	0.989083	0.982613	0.997213	449	49.9802	5.0083	0.985405	0.344708
UV8b_6104	[locus_tag=UV8b_6104] [protein=actin] [protein_id=KDB13104.1] [location=complement(join(264627..264857,264925..265696,265839..265869,266022..266077,266269..266299,266419..266425))] [gbkey=CDS] - [JHTR01000036.1_prot_KDB13104.1_6104]	2248.55	60.27	1	15	17	103	0.995762	0.994489	1.01844	0.970871	0.997541	0.995552	375	41.5669	5.69385	0.985135	0.267393
UV8b_7660	[locus_tag=UV8b_7660] [protein=heat shock protein 90] [protein_id=KDB11515.1] [location=121171..123288] [gbkey=CDS] - [JHTR01000067.1_prot_KDB11515.1_7660]	2199.83	49.22	4	47	49	246	0.995831	1.00776	1.01951	0.977221	1.00331	0.984084	705	80.207	4.95752	0.980655	0.133495
UV8b_8155	[locus_tag=UV8b_8155] [protein=subtilisin-like serine protease PR1H] [protein_id=KDB11027.1] [location=complement(join(101814..103046,103126..103488))] [gbkey=CDS] - [JHTR01000083.1_prot_KDB11027.1_8155]	2186.91	19.96	1	13	13	82	0.953383	0.947649	0.966909	1.05113	1.06865	1.03515	531	57.0627	6.94678	1.10007	0.00104258
UV8b_5265	[locus_tag=UV8b_5265] [protein=ATP citrate lyase] [protein_id=KDB13931.1] [location=join(317322..317762,318015..319043)] [gbkey=CDS] - [JHTR01000028.1_prot_KDB13931.1_5265]	2080.96	40.08	1	16	17	112	0.947422	0.95898	0.991321	1.0156	1.05711	1.01831	489	53.3748	6.30322	1.0667	0.0264759
UV8b_6438	[locus_tag=UV8b_6438] [protein=ATP synthase beta chain precursor] [protein_id=KDB12782.1] [location=join(264866..264885,264930..264995,265093..265237,265297..265318,265396..265481,265550..265592,265644..266198,266253..266947)] [gbkey=CDS] - [JHTR01000040.1_prot_KDB12782.1_6438]	2070.93	39.59	1	16	16	114	0.993598	0.981285	1.01362	1.0097	1.01139	0.990637	543	58.1273	5.94775	1.00777	0.538794
UV8b_3446	[locus_tag=UV8b_3446] [protein=wall-associated proteinase precursor] [protein_id=KDB15806.1] [location=join(512033..512448,512511..512710,512807..513204)] [gbkey=CDS] - [JHTR01000014.1_prot_KDB15806.1_3446]	2064.08	75.96	1	26	26	156	1.01261	1.02527	1.05642	0.95478	1.00463	0.974586	337	37.3623	5.90967	0.948194	0.0517513
UV8b_3249	[locus_tag=UV8b_3249] [protein=fatty acid synthase beta subunit dehydratase] [protein_id=KDB15937.1] [location=complement(398417..404722)] [gbkey=CDS] - [JHTR01000013.1_prot_KDB15937.1_3249]	1918.69	25.84	1	46	46	127	0.976251	0.996883	1.02214	0.971868	1.0244	0.996339	2101	233.012	6.15088	0.99911	0.966934
UV8b_4211	[locus_tag=UV8b_4211] [protein=Phosphoglycerate kinase] [protein_id=KDB15065.1] [location=join(491887..491952,492176..492596,492731..493500)] [gbkey=CDS] - [JHTR01000019.1_prot_KDB15065.1_4211]	1870.96	45.93	1	17	17	98	1.0032	1.01792	1.06754	0.93234	1.01328	0.968797	418	44.5044	7.1665	0.943585	0.129019
UV8b_6874	[locus_tag=UV8b_6874] [protein=pyridoxal-dependent decarboxylase domain protein] [protein_id=KDB12275.1] [location=complement(join(62103..62670,62723..63594,63656..63764,63844..64429,64524..64877,64937..65315,65381..65530))] [gbkey=CDS] - [JHTR01000047.1_prot_KDB12275.1_6874]	1863.12	41.29	1	33	34	115	1.04133	1.05189	1.04065	0.951147	0.940547	0.940753	1005	112.549	5.64307	0.903817	3.76147e-05
UV8b_5623	[locus_tag=UV8b_5623] [protein=protein disulfide isomerase] [protein_id=KDB13525.1] [location=join(196093..196234,196381..197747)] [gbkey=CDS] - [JHTR01000031.1_prot_KDB13525.1_5623]	1838.22	51	1	26	27	110	0.998656	0.995897	0.971342	1.02702	1.00202	1.00183	502	54.6215	5.0083	1.02191	0.146791
UV8b_2263	[locus_tag=UV8b_2263] [protein=immunogenic protein] [protein_id=KDB16672.1] [location=complement(join(77190..78317,78378..78567,78633..78865))] [gbkey=CDS] - [JHTR01000009.1_prot_KDB16672.1_2263]	1803.71	45.16	1	25	25	137	0.911265	0.952738	0.90118	1.10785	1.0985	1.08948	516	54.2446	5.05908	1.1919	0.00044382
UV8b_2632	[locus_tag=UV8b_2632] [protein=acetyl-CoA carboxylase] [protein_id=KDB16597.1] [location=complement(join(417518..419082,419186..424313,424428..424613))] [gbkey=CDS] - [JHTR01000010.1_prot_KDB16597.1_2632]	1802.14	21.99	2	46	47	121	0.976767	0.972643	0.962364	1.03297	1.02934	1.04135	2292	255.487	6.81494	1.0659	0.000327576
UV8b_4452	[locus_tag=UV8b_4452] [protein=Plasma membrane ATPase (Proton pump)] [protein_id=KDB14596.1] [location=complement(join(65848..65894,66043..68371,69230..69628))] [gbkey=CDS] - [JHTR01000021.1_prot_KDB14596.1_4452]	1779.88	30.09	1	27	27	116	0.944165	0.947894	0.938492	1.06583	1.06714	1.05779	924	99.9921	5.22412	1.12726	7.34367e-06
UV8b_5256	[locus_tag=UV8b_5256] [protein=cyclophilin A] [protein_id=KDB13922.1] [location=join(301070..301092,301220..301394)] [gbkey=CDS] - [JHTR01000028.1_prot_KDB13922.1_5256]	1717.27	40	1	2	2	83	1.01429	1.01524	0.981903	0.999435	0.98156	0.991407	65	6.93452	5.17334	0.987039	0.343352
UV8b_6611	[locus_tag=UV8b_6611] [protein=mitochondrial peroxiredoxin PRX1] [protein_id=KDB12590.1] [location=complement(join(194762..195083,195407..195741))] [gbkey=CDS] - [JHTR01000042.1_prot_KDB12590.1_6611]	1715.84	57.8	1	11	11	62	0.992982	1.00815	1.03352	0.964851	0.998178	0.978353	218	24.2246	6.40479	0.969266	0.111625
UV8b_7779	[locus_tag=UV8b_7779] [protein=glucose-regulated protein] [protein_id=KDB11386.1] [location=join(77250..77384,77522..77706,77784..78024,78085..79332,79392..79580)] [gbkey=CDS] - [JHTR01000072.1_prot_KDB11386.1_7779]	1702.27	47.82	1	35	35	144	1.01133	1.00095	0.972002	1.02248	0.962188	0.98717	665	72.6163	5.03369	0.99583	0.853579
UV8b_3176	[locus_tag=UV8b_3176] [protein=ribosomal protein L14] [protein_id=KDB15864.1] [location=join(155848..155983,156038..156078,156144..156206,157591..157731,157808..158122)] [gbkey=CDS] - [JHTR01000013.1_prot_KDB15864.1_3176]	1700.28	36.8	1	10	11	66	1.03027	1.05405	1.07038	0.957928	0.948879	0.939266	231	25.8666	9.59814	0.90217	0.00131236
UV8b_3250	[locus_tag=UV8b_3250] [protein=fatty acid synthase subunit alpha] [protein_id=KDB15938.1] [location=join(408784..409309,409397..414339,414414..414524)] [gbkey=CDS] - [JHTR01000013.1_prot_KDB15938.1_3250]	1698.97	29.64	1	48	48	135	0.946836	0.967455	1.00069	1.004	1.08706	1.04468	1859	204.402	6.22705	1.07573	0.0621117
UV8b_859	[locus_tag=UV8b_859] [protein=putative RNA binding effector protein Scp160] [protein_id=KDB18011.1] [location=complement(join(52290..53248,53370..55626,55705..56313))] [gbkey=CDS] - [JHTR01000003.1_prot_KDB18011.1_859]	1571.97	30.93	1	31	31	84	1.02116	1.00923	1.01698	0.978812	1.00394	0.980327	1274	138.826	7.89893	0.972339	0.0337389
UV8b_2980	[locus_tag=UV8b_2980] [protein=putative enolase] [protein_id=KDB16050.1] [location=complement(join(217274..218069,218128..218178,218244..218335,218405..218658,218718..218841))] [gbkey=CDS] - [JHTR01000012.1_prot_KDB16050.1_2980]	1571.95	38.36	1	15	16	70	0.98028	0.998391	1.02365	0.972168	0.979545	0.983267	438	46.996	5.33838	0.977571	0.159108
UV8b_2660	[locus_tag=UV8b_2660] [protein=protein disulfide-isomerase tigA precursor] [protein_id=KDB16625.1] [location=complement(join(558409..559013,559102..559615))] [gbkey=CDS] - [JHTR01000010.1_prot_KDB16625.1_2660]	1566.62	52.69	1	19	19	89	1.04253	1.04425	1.03986	0.95638	0.945995	0.973609	372	40.252	6.59521	0.919832	0.000511039
UV8b_4947	[locus_tag=UV8b_4947] [protein=putative restin] [protein_id=KDB14352.1] [location=525913..529263] [gbkey=CDS] - [JHTR01000024.1_prot_KDB14352.1_4947]	1559.65	34.41	1	34	34	98	0.989792	1.01793	1.0264	0.985587	1.00717	0.991206	1116	118.732	5.16064	0.983468	0.261988
UV8b_4324	[locus_tag=UV8b_4324] [protein=calreticulin] [protein_id=KDB14801.1] [location=join(233975..234100,234349..234640,234737..235521,235623..236135)] [gbkey=CDS] - [JHTR01000020.1_prot_KDB14801.1_4324]	1528.97	42.56	1	24	24	114	0.971951	1.00555	1.02409	0.9785	1.03384	1.00021	571	62.6738	5.33838	1.00365	0.877184
UV8b_1932	[locus_tag=UV8b_1932] [protein=NIMA-interacting protein TinC] [protein_id=KDB17335.1] [location=join(637050..637173,637272..637829,637923..638102,638172..638716,638799..640163)] [gbkey=CDS] - [JHTR01000007.1_prot_KDB17335.1_1932]	1509.7	36.84	2	30	30	104	1.00728	1.02203	1.06129	0.963156	0.974127	0.974833	923	101.79	5.2749	0.94225	0.0228905
UV8b_5923	[locus_tag=UV8b_5923] [protein=mannose-1-phosphate guanylyltransferase (GDP)] [protein_id=KDB13163.1] [location=join(88614..88676,89065..89154,89416..90400,90545..90634,90776..90966)] [gbkey=CDS] - [JHTR01000034.1_prot_KDB13163.1_5923]	1507.52	31.99	2	9	10	52	1.0015	0.999405	1.00659	0.962608	0.977179	0.999432	472	50.5811	5.65576	0.977299	0.105482
UV8b_739	[locus_tag=UV8b_739] [protein=60S ribosomal protein L3] [protein_id=KDB18497.1] [location=complement(join(702133..702385,702492..703165,703232..703388,703499..703584,703675..703680))] [gbkey=CDS] - [JHTR01000002.1_prot_KDB18497.1_739]	1489.03	56.27	1	27	27	102	1.00212	1.04663	1.10967	0.89622	0.99461	0.909575	391	44.0385	10.3159	0.886648	0.0529046
UV8b_2172	[locus_tag=UV8b_2172] [protein=heat shock 70 kDa protein precursor] [protein_id=KDB17080.1] [location=578656..580776] [gbkey=CDS] - [JHTR01000008.1_prot_KDB17080.1_2172]	1486.75	35.69	1	25	26	116	1.04053	1.04029	0.998081	0.96704	0.960639	0.974974	706	76.5397	6.15088	0.942757	0.0161992
UV8b_5582	[locus_tag=UV8b_5582] [protein=6-phosphogluconate dehydrogenase] [protein_id=KDB13484.1] [location=complement(join(84627..85067,85158..85595,85690..86245,86400..86546,86895..86908))] [gbkey=CDS] - [JHTR01000031.1_prot_KDB13484.1_5582]	1483.98	45.01	1	21	21	91	1.0207	1.03517	1.06571	0.940447	0.980833	0.959867	531	57.9465	6.91748	0.922977	0.010517
UV8b_4319	[locus_tag=UV8b_4319] [protein=inorganic pyrophosphatase] [protein_id=KDB14796.1] [location=join(220562..220744,221006..221125,221193..221536,221610..221693,221748..221889)] [gbkey=CDS] - [JHTR01000020.1_prot_KDB14796.1_4319]	1480.01	59.31	1	15	15	80	0.998613	1.02895	1.04101	0.959403	1.00472	0.996667	290	32.9858	5.47803	0.964872	0.128753
UV8b_7585	[locus_tag=UV8b_7585] [protein=putative mitochondrial aconitate hydratase] [protein_id=KDB11543.1] [location=join(50385..50498,50619..51261,51368..51490,51547..52856,52976..53149)] [gbkey=CDS] - [JHTR01000066.1_prot_KDB11543.1_7585]	1479.43	35.07	1	24	26	99	1.02248	1.00209	0.989802	1.00417	0.973759	0.990776	787	85.8907	6.96143	0.984848	0.305556
UV8b_3657	[locus_tag=UV8b_3657] [protein=Peroxidase/catalase] [protein_id=KDB15626.1] [location=join(480266..480595,480730..482616)] [gbkey=CDS] - [JHTR01000015.1_prot_KDB15626.1_3657]	1472.98	51.49	1	32	32	97	1.06488	1.05995	0.995332	0.965357	0.895035	0.96122	738	81.5492	6.59521	0.904316	0.0357208
UV8b_2711	[locus_tag=UV8b_2711] [protein=putative GTP cyclohydrolase II] [protein_id=KDB16255.1] [location=complement(join(95533..95676,95750..96251,96326..96351,96412..96496,97289..97358,97419..97504,97574..97603,97659..97821,97970..98111,98160..98242,98303..98345,98399..98454,98606..98679,98755..98792,98853..98896,98947..99007))] [gbkey=CDS] - [JHTR01000011.1_prot_KDB16255.1_2711]	1460.73	38.87	1	24	24	106	1.01679	1.02977	1.07495	0.958443	0.964422	0.960566	548	61.8797	9.26123	0.92373	0.0109882
UV8b_7088	[locus_tag=UV8b_7088] [protein=NACHT domain protein] [protein_id=KDB12095.1] [location=join(160320..160877,160971..161169,161228..162942,163012..163575)] [gbkey=CDS] - [JHTR01000051.1_prot_KDB12095.1_7088]	1450.13	35.31	1	31	31	109	0.89146	0.906488	0.938028	1.09739	1.15707	1.09808	1011	115.741	6.72705	1.22535	0.00103318
UV8b_4398	[locus_tag=UV8b_4398] [protein=pyruvate carboxylase] [protein_id=KDB14875.1] [location=complement(join(458541..458747,458875..459141,459222..459497,460785..460832,460887..462182,462250..462260,462342..464085,464193..464254,464317..464514,464570..464665,465144..465276))] [gbkey=CDS] - [JHTR01000020.1_prot_KDB14875.1_4398]	1444.35	29.07	1	38	40	101	1.024	1.02379	1.0226	0.978184	0.988769	0.974225	1445	157.598	7.7085	0.957918	0.000590946
UV8b_2940	[locus_tag=UV8b_2940] [protein=glutamate carboxypeptidase] [protein_id=KDB16010.1] [location=complement(join(109083..109263,109321..110570))] [gbkey=CDS] - [JHTR01000012.1_prot_KDB16010.1_2940]	1437.21	45.59	1	17	17	77	1.03493	1.04515	1.07105	0.953471	0.967593	0.925505	476	52.5943	5.5542	0.903349	0.00344999
UV8b_6828	[locus_tag=UV8b_6828] [protein=phosphoglucomutase 2] [protein_id=KDB12341.1] [location=join(121906..121958,122074..122171,122284..122487,122573..123586,123711..124003)] [gbkey=CDS] - [JHTR01000046.1_prot_KDB12341.1_6828]	1436.98	36.71	1	19	19	73	1.04891	1.04683	1.03866	0.94187	0.927655	0.948426	553	59.7864	6.37939	0.899038	0.000105708
UV8b_1055	[locus_tag=UV8b_1055] [protein=ATP synthase f1] [protein_id=KDB18207.1] [location=join(697923..698115,698176..698688,698786..700374)] [gbkey=CDS] - [JHTR01000003.1_prot_KDB18207.1_1055]	1432.7	25	1	16	16	65	0.975244	0.975191	0.965504	1.02887	1.03288	1.05157	764	79.4826	5.57959	1.06769	0.00103365
UV8b_2184	[locus_tag=UV8b_2184] [protein=rab GDP-dissociation inhibitor] [protein_id=KDB17092.1] [location=complement(join(640408..640581,640669..640823,640907..641449,641510..641855,641953..641980,642118..642177,642254..642780))] [gbkey=CDS] - [JHTR01000008.1_prot_KDB17092.1_2184]	1425.22	41.8	1	22	22	75	0.995068	0.983211	0.989038	0.991687	1.00297	0.984128	610	67.5367	8.52881	1.00386	0.585681
UV8b_567	[locus_tag=UV8b_567] [protein=cell division control protein 10] [protein_id=KDB18325.1] [location=complement(join(200946..201281,201341..201903,201983..202100))] [gbkey=CDS] - [JHTR01000002.1_prot_KDB18325.1_567]	1404.85	51.18	1	13	13	47	0.967881	0.981453	1.03683	0.982382	1.0504	1.02162	338	38.4238	7.84033	1.02285	0.474801
UV8b_2083	[locus_tag=UV8b_2083] [protein=putative fumarate reductase Osm1] [protein_id=KDB16991.1] [location=join(300261..300294,300402..300470,300720..300957,301057..302593)] [gbkey=CDS] - [JHTR01000008.1_prot_KDB16991.1_2083]	1404.32	41.44	1	21	22	89	0.961609	0.965366	0.993629	1.00828	1.05927	1.02099	625	66.8908	6.99072	1.0575	0.0380415
UV8b_6705	[locus_tag=UV8b_6705] [protein=putative polyketide synthase] [protein_id=KDB12481.1] [location=join(189601..190524,190642..190667,190733..190798,190885..191078,191187..191742,191892..197019,197096..197272,197386..198024)] [gbkey=CDS] - [JHTR01000044.1_prot_KDB12481.1_6705]	1384.31	19.23	1	37	37	82	0.891682	0.894767	0.862703	1.12845	1.13826	1.12507	2569	277.877	6.32861	1.28033	2.26933e-05
UV8b_5776	[locus_tag=UV8b_5776] [protein=TH14-3-3 like protein] [protein_id=KDB13397.1] [location=join(259093..259153,259235..259541,259655..259896,260009..260079,260160..260282)] [gbkey=CDS] - [JHTR01000032.1_prot_KDB13397.1_5776]	1360.45	55.81	1	14	18	82	1.02028	0.999843	1.01285	1.00484	0.992285	0.992858	267	29.864	4.89404	0.985825	0.118888
UV8b_689	[locus_tag=UV8b_689] [protein=Heat shock protein 60 precursor (Antigen HIS-62)] [protein_id=KDB18447.1] [location=complement(join(580636..580773,580874..580922,580983..581056,581134..581308,582957..584457,584526..584667,584762..584854))] [gbkey=CDS] - [JHTR01000002.1_prot_KDB18447.1_689]	1360.17	23.51	1	19	19	75	1.01036	1.00615	1.06432	0.951944	0.999822	0.952468	723	77.3864	5.88428	0.942679	0.07454
UV8b_6442	[locus_tag=UV8b_6442] [protein=putative oxoglutarate dehydrogenase precursor] [protein_id=KDB12786.1] [location=join(277076..279680,279749..280293)] [gbkey=CDS] - [JHTR01000040.1_prot_KDB12786.1_6442]	1356.86	34.99	1	26	26	66	0.994494	0.999434	0.998119	0.996308	1.00193	1.00383	1049	118.264	7.07861	1.00335	0.283356
UV8b_5676	[locus_tag=UV8b_5676] [protein=hypothetical protein] [protein_id=KDB13578.1] [location=complement(join(369668..369673,369720..369841,369924..371503,371599..371830,371926..371996,372168..372172))] [gbkey=CDS] - [JHTR01000031.1_prot_KDB13578.1_5676]	1347.34	41.28	1	20	21	87	0.979447	0.979501	0.982594	1.00902	1.03678	1.02062	671	74.5335	6.53662	1.04245	0.0068504
UV8b_4488	[locus_tag=UV8b_4488] [protein=hypothetical protein] [protein_id=KDB14632.1] [location=join(186612..186784,186853..186893,186971..190324,190414..193030,193202..193334)] [gbkey=CDS] - [JHTR01000021.1_prot_KDB14632.1_4488]	1331.85	18.76	2	35	35	74	1.01022	1.0248	1.00074	0.993942	0.986204	0.994354	2105	232.03	6.48096	0.97982	0.0524892
UV8b_2451	[locus_tag=UV8b_2451] [protein=putative hydroxyacylglutathione hydrolase] [protein_id=KDB16860.1] [location=complement(join(689698..689784,689901..689927,690015..690149,690224..690315,690439..690652,690719..690752,690856..690927,690998..691085,691155..691197,691260..691337))] [gbkey=CDS] - [JHTR01000009.1_prot_KDB16860.1_2451]	1330.26	52.94	1	15	15	52	0.957684	0.920584	0.895805	1.10731	1.03796	1.09811	289	31.5449	7.1958	1.16918	0.00517696
UV8b_6536	[locus_tag=UV8b_6536] [protein=60S ribosomal protein L5] [protein_id=KDB12690.1] [location=complement(join(268679..269546,270593..270681))] [gbkey=CDS] - [JHTR01000041.1_prot_KDB12690.1_6536]	1297.7	55.03	1	15	15	66	1.00179	1.03021	1.0473	0.962962	0.997833	0.971069	318	35.7963	8.67529	0.952123	0.0441189
UV8b_2392	[locus_tag=UV8b_2392] [protein=elongation factor 1-gamma] [protein_id=KDB16801.1] [location=complement(join(515344..516316,516379..516427,516714..516900,516985..517014))] [gbkey=CDS] - [JHTR01000009.1_prot_KDB16801.1_2392]	1293.92	51.94	1	18	18	93	0.994646	1.02631	1.08057	0.919596	1.02383	0.948795	412	46.4045	6.1001	0.932514	0.15538
UV8b_1272	[locus_tag=UV8b_1272] [protein=cell division control protein Cdc48] [protein_id=KDB17905.1] [location=join(421142..421291,421356..421411,421506..421755,421857..423348,423468..424060)] [gbkey=CDS] - [JHTR01000004.1_prot_KDB17905.1_1272]	1291.42	33.92	1	21	22	84	1.02108	1.02457	1.03733	0.977063	0.990037	0.984215	846	92.8622	5.19873	0.957292	0.00210633
UV8b_4979	[locus_tag=UV8b_4979] [protein=aminopeptidase 2] [protein_id=KDB14189.1] [location=complement(join(402320..402787,402963..404078,404165..404981,405114..405362,406275..406393))] [gbkey=CDS] - [JHTR01000025.1_prot_KDB14189.1_4979]	1282.19	33.84	1	29	29	83	1.04808	1.0308	1.0266	0.945242	0.944597	0.946366	922	102.352	5.56689	0.913292	0.00016863
UV8b_6622	[locus_tag=UV8b_6622] [protein=Pyruvate kinase] [protein_id=KDB12601.1] [location=join(239823..240271,240408..241575)] [gbkey=CDS] - [JHTR01000042.1_prot_KDB12601.1_6622]	1278.11	44.8	1	20	20	63	0.998028	0.999614	1.01596	0.981962	1.04974	1.00982	538	58.8878	6.72705	1.00926	0.673288
UV8b_3211	[locus_tag=UV8b_3211] [protein=Heat shock protein Hsp88] [protein_id=KDB15899.1] [location=join(263502..263514,263679..263740,263861..263892,264083..265541,265621..265926,265999..266286)] [gbkey=CDS] - [JHTR01000013.1_prot_KDB15899.1_3211]	1264.94	34.63	1	25	27	86	0.988926	1.0099	1.04144	0.973876	1.03413	0.996905	719	79.7506	5.13525	0.988372	0.639074
UV8b_1098	[locus_tag=UV8b_1098] [protein=putative maltase MLT3] [protein_id=KDB18250.1] [location=complement(join(829795..830318,830890..831409,831717..833615,833672..833746))] [gbkey=CDS] - [JHTR01000003.1_prot_KDB18250.1_1098]	1250.75	21.49	1	19	20	70	0.995546	1.00214	1.02271	0.989172	0.982448	0.99883	1005	111.288	8.92432	0.983462	0.153294
UV8b_2410	[locus_tag=UV8b_2410] [protein=cell division control protein 12] [protein_id=KDB16819.1] [location=complement(join(562590..563168,563265..563328,563549..564279,564430..564585))] [gbkey=CDS] - [JHTR01000009.1_prot_KDB16819.1_2410]	1233.98	32.42	1	6	16	69	1.03921	0.999572	0.998814	1.01586	0.917016	0.942754	509	57.092	6.32861	0.946679	0.171719
UV8b_3216	[locus_tag=UV8b_3216] [protein=Eukaryotic translation initiation factor eIF-5A] [protein_id=KDB15904.1] [location=join(284565..284576,284904..285209,285259..285391,285543..285610)] [gbkey=CDS] - [JHTR01000013.1_prot_KDB15904.1_3216]	1232.27	40.7	1	6	6	69	0.958527	0.984224	0.97185	1.00059	1.03576	1.0131	172	18.8844	5.30029	1.04627	0.023958
UV8b_985	[locus_tag=UV8b_985] [protein=putative transcription factor (Snd1/p100)] [protein_id=KDB18137.1] [location=complement(477719..480370)] [gbkey=CDS] - [JHTR01000003.1_prot_KDB18137.1_985]	1228.55	38.39	1	25	30	81	1.04112	1.03923	1.02573	0.975136	0.978895	0.966445	883	97.7366	8.26514	0.940246	0.000528622
UV8b_8261	[locus_tag=UV8b_8261] [protein=malate dehydrogenase precursor] [protein_id=KDB10889.1] [location=complement(join(50626..50766,50859..51003,51062..51524,51650..51737,51848..51958,52028..52059,52175..52187))] [gbkey=CDS] - [JHTR01000100.1_prot_KDB10889.1_8261]	1228.01	50.61	2	16	17	87	1.01097	1.03976	1.10023	0.940885	0.992202	0.957785	330	34.3655	7.51807	0.917458	0.0459957
UV8b_5015	[locus_tag=UV8b_5015] [protein=60S ribosomal protein L9] [protein_id=KDB14026.1] [location=join(81754..81799,82113..82160,82272..82705,82918..82968)] [gbkey=CDS] - [JHTR01000026.1_prot_KDB14026.1_5015]	1208.59	65.63	1	12	12	81	1.00715	1.01602	1.10292	0.946864	0.98584	0.940415	192	21.8728	9.59814	0.919078	0.066533
UV8b_4772	[locus_tag=UV8b_4772] [protein=14-3-3-like protein] [protein_id=KDB14501.1] [location=join(485994..486125,486475..486824,486944..487031,487146..487511)] [gbkey=CDS] - [JHTR01000023.1_prot_KDB14501.1_4772]	1204.34	53.38	1	15	19	76	0.974748	1.00198	1.00727	0.997249	1.02777	1.00888	311	34.7413	5.05908	1.01672	0.283481
UV8b_4558	[locus_tag=UV8b_4558] [protein=CipC1 protein, concanamycin induced protein C] [protein_id=KDB14702.1] [location=join(501948..501963,502062..502196,502329..502498)] [gbkey=CDS] - [JHTR01000021.1_prot_KDB14702.1_4558]	1202.87	87.74	1	8	8	55	1.03791	1.05173	1.11372	0.889126	0.977338	0.928176	106	11.9888	6.01123	0.872407	0.0169361
UV8b_984	[locus_tag=UV8b_984] [protein=transaldolase] [protein_id=KDB18136.1] [location=complement(join(475424..475660,475718..476101,476194..476391))] [gbkey=CDS] - [JHTR01000003.1_prot_KDB18136.1_984]	1177.3	36.03	2	15	15	74	1.00838	1.04213	1.09937	0.907922	0.991949	0.925081	272	30.3518	5.37646	0.896843	0.0426164
UV8b_3109	[locus_tag=UV8b_3109] [protein=fimbrin] [protein_id=KDB16179.1] [location=join(589642..589664,589752..589962,590057..590748,590867..591852,592011..592042)] [gbkey=CDS] - [JHTR01000012.1_prot_KDB16179.1_3109]	1161.68	36.63	1	19	19	61	1.0238	1.01265	1.00264	1.00474	0.973128	0.973262	647	72.1364	6.02393	0.971055	0.0734872
UV8b_3341	[locus_tag=UV8b_3341] [protein=60S ribosomal protein L8] [protein_id=KDB15701.1] [location=join(169307..169822,169921..170121)] [gbkey=CDS] - [JHTR01000014.1_prot_KDB15701.1_3341]	1143.36	52.94	1	17	17	88	1.07971	1.07063	1.10427	0.903493	0.910584	0.922303	238	27.0191	10.1987	0.840771	0.000112386
UV8b_5917	[locus_tag=UV8b_5917] [protein=cystein rich protein] [protein_id=KDB13157.1] [location=complement(join(64562..64776,65112..65633,65792..66302))] [gbkey=CDS] - [JHTR01000034.1_prot_KDB13157.1_5917]	1133.49	30.12	1	11	11	52	0.815335	0.80975	0.76246	1.3078	1.14605	1.22786	415	44.9747	7.44482	1.54205	0.000963126
UV8b_940	[locus_tag=UV8b_940] [protein=heat shock protein 70] [protein_id=KDB18092.1] [location=join(298659..298701,298837..299014,299096..299261,299344..300248,300351..300903)] [gbkey=CDS] - [JHTR01000003.1_prot_KDB18092.1_940]	1120.42	35.67	1	21	23	69	1.02921	1.00845	1.03427	0.971197	0.986797	0.961773	614	66.6494	5.40186	0.950466	0.00919001
UV8b_900	[locus_tag=UV8b_900] [protein=beta-tubulin] [protein_id=KDB18052.1] [location=join(185413..185424,185654..185677,185746..185868,185984..186774,186841..187233,187547..187664,187726..188014,188162..188275,188374..188741)] [gbkey=CDS] - [JHTR01000003.1_prot_KDB18052.1_900]	1108.86	27.86	1	12	16	47	0.977335	1.03375	1.14582	0.911013	0.979707	0.954443	743	82.1512	6.49365	0.901252	0.123653
UV8b_6050	[locus_tag=UV8b_6050] [protein=clathrin heavy chain] [protein_id=KDB13050.1] [location=join(81766..81852,81948..82319,82411..86643,86758..87120)] [gbkey=CDS] - [JHTR01000036.1_prot_KDB13050.1_6050]	1104.27	22.74	2	30	31	70	0.9809	1.00633	1.0329	0.981312	1.02592	1.01665	1684	190.307	5.5415	1.00124	0.953753
UV8b_5768	[locus_tag=UV8b_5768] [protein=cell cycle control protein] [protein_id=KDB13389.1] [location=join(240447..240483,240771..240848,240999..242077)] [gbkey=CDS] - [JHTR01000032.1_prot_KDB13389.1_5768]	1098.88	33.5	1	10	11	61	0.978462	1.03049	1.05189	0.938958	1.016	0.978176	397	44.7519	5.12256	0.958278	0.24349
UV8b_7151	[locus_tag=UV8b_7151] [protein=tropomyosin-1] [protein_id=KDB12008.1] [location=complement(join(65285..65447,65542..65843))] [gbkey=CDS] - [JHTR01000053.1_prot_KDB12008.1_7151]	1096.85	59.74	1	12	12	62	1.00783	1.0112	1.05287	0.941674	0.991273	0.989297	154	17.9712	4.94482	0.951281	0.0834447
UV8b_1560	[locus_tag=UV8b_1560] [protein=T-complex protein 1, beta subunit] [protein_id=KDB17676.1] [location=join(627813..627970,628117..629491,629551..629610)] [gbkey=CDS] - [JHTR01000005.1_prot_KDB17676.1_1560]	1079.26	33.21	1	14	14	47	1.04633	1.01179	1.01747	0.985713	0.940979	0.98664	530	57.1802	6.0874	0.947241	0.0429253
UV8b_4279	[locus_tag=UV8b_4279] [protein=putative septin AspA] [protein_id=KDB14756.1] [location=join(105612..105629,105805..105880,106004..106120,106198..106285,106360..106497,106572..107043)] [gbkey=CDS] - [JHTR01000020.1_prot_KDB14756.1_4279]	1066.39	41.72	1	12	12	58	0.953326	0.966917	1.07296	0.96391	1.08876	1.00344	302	34.2284	5.70654	1.02102	0.71152
UV8b_988	[locus_tag=UV8b_988] [protein=Superoxide dismutase] [protein_id=KDB18140.1] [location=complement(join(485571..485593,485657..485753,485838..485989,486072..486273))] [gbkey=CDS] - [JHTR01000003.1_prot_KDB18140.1_988]	1059.38	35.03	1	5	5	47	1.01105	1.0527	1.02416	0.969667	0.945121	0.958419	157	16.094	6.80029	0.93047	0.00727435
UV8b_3551	[locus_tag=UV8b_3551] [protein=Cytochrome c biogenesis factor] [protein_id=KDB15520.1] [location=complement(join(188300..188437,188540..189750,189818..190116,190240..190310))] [gbkey=CDS] - [JHTR01000015.1_prot_KDB15520.1_3551]	1054.07	46.68	1	25	25	79	0.98929	0.993564	0.980242	1.00489	1.02222	1.01747	572	63.7847	6.21436	1.0275	0.0138784
UV8b_8162	[locus_tag=UV8b_8162] [protein=fructose-bisphosphate aldolase, class II] [protein_id=KDB10987.1] [location=complement(join(57522..57630,57670..57755,57830..58603,58665..58775,58842..58949))] [gbkey=CDS] - [JHTR01000085.1_prot_KDB10987.1_8162]	1053.09	34.18	1	13	13	66	0.976094	1.01417	1.06285	0.957873	1.01795	0.978256	395	43.2275	5.59229	0.967565	0.342571
UV8b_535	[locus_tag=UV8b_535] [protein=aldehyde dehydrogenase] [protein_id=KDB19144.1] [location=complement(join(2271044..2271499,2271757..2272605,2272736..2273174,2273222..2273283))] [gbkey=CDS] - [JHTR01000001.1_prot_KDB19144.1_535]	1044.08	28.12	1	13	13	58	1.05744	1.05638	0.988517	0.975087	0.935172	0.969594	601	65.0683	8.38232	0.928285	0.0462709
UV8b_5405	[locus_tag=UV8b_5405] [protein=phosphoglycerate mutase, 2,3-bisphosphoglycerate-independent] [protein_id=KDB13798.1] [location=complement(join(374228..375054,375124..375505,375571..375923,376158..376188))] [gbkey=CDS] - [JHTR01000029.1_prot_KDB13798.1_5405]	1004.99	45.47	1	21	22	70	0.995449	1.00466	1.05637	0.973112	0.981154	1.00445	530	58.4804	5.78271	0.968012	0.198377
UV8b_7968	[locus_tag=UV8b_7968] [protein=triosephosphate isomerase] [protein_id=KDB11157.1] [location=join(16081..16118,16300..16370,16456..17058,17167..17198)] [gbkey=CDS] - [JHTR01000078.1_prot_KDB11157.1_7968]	1004.42	42.51	1	8	8	39	1.01205	1.03392	1.04603	0.948111	0.982456	0.989257	247	27.108	5.77002	0.944316	0.0237551
UV8b_7562	[locus_tag=UV8b_7562] [protein=UDP-glucose 4-epimerase Gal10] [protein_id=KDB11595.1] [location=join(104179..104207,104382..104616,104722..105159,105275..105670)] [gbkey=CDS] - [JHTR01000065.1_prot_KDB11595.1_7562]	1003.72	43.01	1	14	14	55	0.989389	0.9797	1.05274	0.961148	1.02264	1.00342	365	40.0356	6.55127	0.988541	0.713076
UV8b_921	[locus_tag=UV8b_921] [protein=alanyl-tRNA synthetase] [protein_id=KDB18073.1] [location=complement(join(234616..234786,234854..237480,237578..237584))] [gbkey=CDS] - [JHTR01000003.1_prot_KDB18073.1_921]	999.128	28.69	1	26	26	69	1.03189	1.03859	1.02598	0.96257	0.959912	0.972963	934	103.408	6.13818	0.935082	0.000241843
UV8b_3635	[locus_tag=UV8b_3635] [protein=alpha-ketoglutarate-dependent taurine dioxygenase] [protein_id=KDB15604.1] [location=join(416767..416916,417036..417768,417836..418089)] [gbkey=CDS] - [JHTR01000015.1_prot_KDB15604.1_3635]	996.602	50	2	18	18	59	1.11489	1.14772	1.16182	0.83068	0.824012	0.828411	378	42.3203	6.52197	0.725116	2.37288e-05
UV8b_1633	[locus_tag=UV8b_1633] [protein=putative coatomer gamma-2 subunit] [protein_id=KDB17749.1] [location=join(850581..850656,850748..851058,851144..853280,853423..853655)] [gbkey=CDS] - [JHTR01000005.1_prot_KDB17749.1_1633]	974.913	23.09	1	15	15	46	1.01391	0.995321	0.99008	1.00601	0.97119	1.0004	918	101.007	5.52881	0.992758	0.607012
UV8b_3320	[locus_tag=UV8b_3320] [protein=Serine hydroxymethyltransferase] [protein_id=KDB15680.1] [location=join(100273..100311,100418..100468,100569..100933,101056..102046)] [gbkey=CDS] - [JHTR01000014.1_prot_KDB15680.1_3320]	959.695	27.65	1	14	14	55	1.03127	1.01679	0.994485	0.998791	0.980217	0.967502	481	53.1193	8.01611	0.968436	0.0847091
UV8b_2608	[locus_tag=UV8b_2608] [protein=phosphoenolpyruvate carboxykinase] [protein_id=KDB16573.1] [location=complement(join(316190..317533,318288..318488,318554..318629,318771..318819,318958..319057))] [gbkey=CDS] - [JHTR01000010.1_prot_KDB16573.1_2608]	956.869	39.56	1	15	15	47	1.10226	1.07839	1.11871	0.894558	0.874094	0.865749	589	65.7409	6.49365	0.798457	0.000106808
UV8b_3122	[locus_tag=UV8b_3122] [protein=50S ribosomal protein L19e] [protein_id=KDB16192.1] [location=complement(join(624666..625214,625285..630540,630612..632677,632736..632883))] [gbkey=CDS] - [JHTR01000012.1_prot_KDB16192.1_3122]	944.053	17.81	1	35	36	66	0.99186	1.02101	1.03883	0.966811	0.992823	0.993068	2672	290.244	5.8208	0.96756	0.111746
UV8b_7328	[locus_tag=UV8b_7328] [protein=oxidoreductase, 2-nitropropane dioxygenase family] [protein_id=KDB11815.1] [location=complement(join(106396..107266,107766..108027,108136..108148))] [gbkey=CDS] - [JHTR01000058.1_prot_KDB11815.1_7328]	943.551	32.28	1	11	11	45	1.03689	1.04173	1.03552	0.937078	0.959481	0.977945	381	40.4088	6.60986	0.92305	0.00261689
UV8b_4873	[locus_tag=UV8b_4873] [protein=malate dehydrogenase precursor] [protein_id=KDB14278.1] [location=complement(join(303615..304453,304667..304784,304856..304906))] [gbkey=CDS] - [JHTR01000024.1_prot_KDB14278.1_4873]	938.954	45.67	1	12	13	43	1.00617	1.02459	1.06705	0.942283	1.00321	0.974773	335	34.8856	9.17334	0.942686	0.0785992
UV8b_1048	[locus_tag=UV8b_1048] [protein=3-isopropylmalate dehydratase] [protein_id=KDB18200.1] [location=join(665892..665991,666081..666112,666196..666270,666379..668544)] [gbkey=CDS] - [JHTR01000003.1_prot_KDB18200.1_1048]	937.725	25.57	1	19	20	66	0.980073	1.00765	1.05057	0.965419	1.03041	0.989003	790	84.7537	6.31592	0.982405	0.558524
UV8b_1703	[locus_tag=UV8b_1703] [protein=adenosine kinase] [protein_id=KDB17446.1] [location=join(553874..553925,554097..554555,554644..555143)] [gbkey=CDS] - [JHTR01000006.1_prot_KDB17446.1_1703]	928.63	39.29	1	10	10	52	0.985591	1.00902	1.03554	0.976182	1.02081	0.991546	336	36.4286	5.5542	0.986268	0.515804
UV8b_5246	[locus_tag=UV8b_5246] [protein=exportin-1] [protein_id=KDB13912.1] [location=complement(join(262485..262722,262825..263623,263720..264190,264358..265123,265219..265940,266006..266077,266179..266251,266591..266656))] [gbkey=CDS] - [JHTR01000028.1_prot_KDB13912.1_5246]	917.552	20.13	1	16	17	47	1.02706	1.01148	1.03127	0.983372	0.956971	0.956038	1068	122.319	5.35107	0.943502	0.00586245
UV8b_2566	[locus_tag=UV8b_2566] [protein=putative Coatomer subunit alpha] [protein_id=KDB16531.1] [location=complement(join(189609..189851,189919..191033,191087..192985,193047..193366,193421..193500))] [gbkey=CDS] - [JHTR01000010.1_prot_KDB16531.1_2566]	913.52	31.69	2	33	33	60	1.00775	0.995591	0.997598	1.01581	0.986078	1.0065	1218	136.484	7.00537	1.00248	0.807664
UV8b_8163	[locus_tag=UV8b_8163] [protein=GTP-binding protein YchF] [protein_id=KDB10988.1] [location=complement(join(59921..60472,60709..61194,61249..61320,61403..61477))] [gbkey=CDS] - [JHTR01000085.1_prot_KDB10988.1_8163]	905.29	40.36	1	12	12	39	1.0186	1.03459	1.07835	0.941743	0.972522	0.969732	394	43.7702	7.43018	0.920952	0.0154994
UV8b_7754	[locus_tag=UV8b_7754] [protein=catalase] [protein_id=KDB11441.1] [location=complement(join(140796..141643,141736..141943,142018..142380,142457..142697,142800..143002,143112..143399))] [gbkey=CDS] - [JHTR01000071.1_prot_KDB11441.1_7754]	902.225	37.01	1	20	20	52	0.954876	0.961189	0.991817	1.03725	1.08619	1.0487	716	78.4415	6.65381	1.09088	0.00918639
UV8b_1893	[locus_tag=UV8b_1893] [protein=Multifunctional beta-oxidation protein] [protein_id=KDB17296.1] [location=complement(join(528227..528515,528705..529160,529301..529455,529707..530126,530255..531051,531165..531591,531745..531903))] [gbkey=CDS] - [JHTR01000007.1_prot_KDB17296.1_1893]	900.768	26.56	1	15	15	52	1.02162	1.03292	1.02505	0.976134	0.965366	0.980136	900	96.5122	7.21045	0.94871	0.00068164
UV8b_7083	[locus_tag=UV8b_7083] [protein=peptidase S8 and S53 subtilisin kexin sedolisin] [protein_id=KDB12090.1] [location=complement(join(147700..147872,147932..148706,148768..149022,149099..149371))] [gbkey=CDS] - [JHTR01000051.1_prot_KDB12090.1_7083]	896.951	28.31	1	10	10	42	0.871866	0.905388	0.915735	1.07539	1.15832	1.11123	491	53.0763	6.354	1.24209	0.00137206
UV8b_2063	[locus_tag=UV8b_2063] [protein=putative nuclear segregation protein (Bfr1)] [protein_id=KDB16971.1] [location=join(218695..218832,219076..220242,220385..220606)] [gbkey=CDS] - [JHTR01000008.1_prot_KDB16971.1_2063]	893.077	58.46	1	34	35	89	1.01223	1.04592	1.04426	0.947637	0.979598	0.964301	508	56.2442	9.05615	0.932029	0.00801853
UV8b_1694	[locus_tag=UV8b_1694] [protein=60S ribosomal protein L10A] [protein_id=KDB17437.1] [location=complement(join(527313..527575,527674..528045,528199..528217))] [gbkey=CDS] - [JHTR01000006.1_prot_KDB17437.1_1694]	892.726	35.94	1	9	9	48	1.03714	1.04931	1.04649	0.900151	0.974219	0.960404	217	24.0791	9.83252	0.904827	0.0124978
UV8b_2830	[locus_tag=UV8b_2830] [protein=3-isopropylmalate dehydrogenase Leu2A] [protein_id=KDB16374.1] [location=join(458986..459072,459164..459884,460022..460263)] [gbkey=CDS] - [JHTR01000011.1_prot_KDB16374.1_2830]	891.056	30.95	1	6	6	34	1.00644	1.00951	1.03127	0.963032	0.982029	0.988702	349	36.9072	5.60498	0.962763	0.0260627
UV8b_1775	[locus_tag=UV8b_1775] [protein=MYB DNA-binding domain containing protein] [protein_id=KDB17178.1] [location=join(99242..100658,101729..101903,102027..102449,102717..103065)] [gbkey=CDS] - [JHTR01000007.1_prot_KDB17178.1_1775]	890.172	20.46	1	19	19	86	1.0635	1.04184	1.02552	0.959627	0.911164	0.955332	787	88.2398	9.61279	0.902667	0.00589617
UV8b_4315	[locus_tag=UV8b_4315] [protein=hexokinase] [protein_id=KDB14792.1] [location=complement(join(210588..211011,211091..211545,211614..212024,212122..212147,212213..212335,212804..212843))] [gbkey=CDS] - [JHTR01000020.1_prot_KDB14792.1_4315]	884.19	33.54	1	15	15	57	1.02849	1.05564	1.0581	0.943156	0.971662	0.955123	492	54.2147	5.59229	0.913342	0.00195712
UV8b_834	[locus_tag=UV8b_834] [protein=vip1] [protein_id=KDB18592.1] [location=complement(1016291..1017103)] [gbkey=CDS] - [JHTR01000002.1_prot_KDB18592.1_834]	880.427	49.26	1	15	15	60	0.958172	1.00094	1.08157	0.90425	1.05224	0.980286	270	28.6763	6.45557	0.96583	0.569653
UV8b_7690	[locus_tag=UV8b_7690] [protein=heat shock protein 30] [protein_id=KDB11467.1] [location=complement(107347..107982)] [gbkey=CDS] - [JHTR01000068.1_prot_KDB11467.1_7690]	877.912	68.72	1	16	16	49	0.759158	0.783407	0.846342	1.09889	1.32015	1.25661	211	23.2635	5.69385	1.53863	0.00373166
UV8b_1753	[locus_tag=UV8b_1753] [protein=ATP-dependent RNA helicase] [protein_id=KDB17156.1] [location=complement(join(23841..23889,23962..24219,24287..24647,24761..25171,25903..26128))] [gbkey=CDS] - [JHTR01000007.1_prot_KDB17156.1_1753]	872.064	41.94	1	17	17	65	0.96325	0.984365	0.983241	1.01843	1.03156	1.03137	434	48.829	6.06201	1.05135	0.00348701
UV8b_8118	[locus_tag=UV8b_8118] [protein=UTP-glucose-1-phosphate uridylyltransferase] [protein_id=KDB11054.1] [location=join(100484..100624,100693..100769,100850..102140)] [gbkey=CDS] - [JHTR01000082.1_prot_KDB11054.1_8118]	855.99	45.82	1	23	24	78	1.04569	1.04959	1.01664	0.948844	0.968562	0.978138	502	56.1193	6.62451	0.930469	0.00592281
UV8b_1246	[locus_tag=UV8b_1246] [protein=4-aminobutyrate aminotransferase] [protein_id=KDB17879.1] [location=complement(join(345129..346383,346497..346777))] [gbkey=CDS] - [JHTR01000004.1_prot_KDB17879.1_1246]	838.568	26.22	1	11	11	39	0.936592	0.983334	1.04119	0.962205	1.07917	1.05084	511	56.3741	9.20264	1.04427	0.399946
UV8b_7084	[locus_tag=UV8b_7084] [protein=peptidase S8 and S53 subtilisin kexin sedolisin] [protein_id=KDB12091.1] [location=complement(join(149965..150273,150366..150658,150718..150789,150881..150992,151052..151284,151374..151527,151593..152232,152360..152406))] [gbkey=CDS] - [JHTR01000051.1_prot_KDB12091.1_7084]	838.525	40.23	1	20	20	53	0.903753	0.900121	0.885245	1.1319	1.12347	1.08112	619	66.1879	8.33838	1.24074	0.000206831
UV8b_3056	[locus_tag=UV8b_3056] [protein=transketolase] [protein_id=KDB16126.1] [location=join(430732..430785,430992..431038,431128..431223,431343..431427,431482..433137,433219..433335)] [gbkey=CDS] - [JHTR01000012.1_prot_KDB16126.1_3056]	832.088	31.73	1	22	22	72	1.05237	1.03381	1.06329	0.927516	0.954362	0.924312	684	74.8225	6.53662	0.891005	0.000876063
UV8b_6697	[locus_tag=UV8b_6697] [protein=acetyl-CoA acetyltransferase] [protein_id=KDB12473.1] [location=join(165875..165939,166059..166108,166199..166271,166333..167335)] [gbkey=CDS] - [JHTR01000044.1_prot_KDB12473.1_6697]	823.833	44.7	1	11	11	55	0.993738	1.01838	0.997114	0.990966	0.99916	0.988765	396	40.7112	6.69775	0.989917	0.29179
UV8b_7852	[locus_tag=UV8b_7852] [protein=mitochondrial processing peptidase beta subunit] [protein_id=KDB11323.1] [location=complement(join(94909..95296,95381..96066,96134..96211,96274..96399,96477..96623))] [gbkey=CDS] - [JHTR01000074.1_prot_KDB11323.1_7852]	823.467	28.27	1	12	12	52	0.970515	0.976769	0.972435	1.00558	1.03818	1.0082	474	52.5697	6.44287	1.04529	0.0142559
UV8b_2408	[locus_tag=UV8b_2408] [protein=cell division control protein 12] [protein_id=KDB16817.1] [location=complement(join(557195..557773,557882..558192,558265..558427,558529..558630))] [gbkey=CDS] - [JHTR01000009.1_prot_KDB16817.1_2408]	819.104	30.21	1	3	13	46	1.03056	1.02115	0.944389	1.05101	1.00645	0.962722	384	44.4731	8.54346	1.00804	0.84028
UV8b_8121	[locus_tag=UV8b_8121] [protein=dtdp-glucose 4,6-dehydratase] [protein_id=KDB11057.1] [location=join(109521..109542,109600..109738,109831..110366,110620..111248)] [gbkey=CDS] - [JHTR01000082.1_prot_KDB11057.1_8121]	813.225	34.01	2	15	15	51	0.962339	0.977026	1.01336	0.975634	1.07925	1.0169	441	49.2292	6.34131	1.04032	0.304464
UV8b_3020	[locus_tag=UV8b_3020] [protein=outer mitochondrial membrane protein porin] [protein_id=KDB16090.1] [location=complement(join(325704..325733,325803..325922,326039..326743,326916..327038,327260..327304))] [gbkey=CDS] - [JHTR01000012.1_prot_KDB16090.1_3020]	804.671	44.12	1	15	15	52	0.973276	0.978171	1.05836	0.947649	1.05398	0.987883	340	35.9496	9.40771	0.993257	0.878388
UV8b_6517	[locus_tag=UV8b_6517] [protein=C-1-tetrahydrofolate synthase] [protein_id=KDB12671.1] [location=complement(join(199052..199205,199253..201789,201860..201897,202176..202644))] [gbkey=CDS] - [JHTR01000041.1_prot_KDB12671.1_6517]	799.975	21.6	1	19	19	39	0.999643	1.05422	1.0178	0.97461	0.988424	0.99457	1065	113.699	9.01221	0.962868	0.0902311
UV8b_3031	[locus_tag=UV8b_3031] [protein=poly(A) RNA binding protein] [protein_id=KDB16101.1] [location=join(365259..367375,367466..367598)] [gbkey=CDS] - [JHTR01000012.1_prot_KDB16101.1_3031]	789.302	30.97	1	23	23	44	0.974249	1.00327	1.09412	0.915664	1.06148	0.951212	749	80.9797	5.57959	0.953354	0.448044
UV8b_2157	[locus_tag=UV8b_2157] [protein=ATP-dependent RNA helicase mss116 precursor] [protein_id=KDB17065.1] [location=join(522478..522836,522904..524318,524350..524492)] [gbkey=CDS] - [JHTR01000008.1_prot_KDB17065.1_2157]	788.118	19.59	1	9	9	32	1.02036	1.02318	1.01218	0.989094	0.976273	0.973165	638	70.3914	8.29443	0.961651	0.00267465
UV8b_709	[locus_tag=UV8b_709] [protein=protein transport protein (SEC31)] [protein_id=KDB18467.1] [location=complement(join(630552..630596,630673..634201,634259..634467))] [gbkey=CDS] - [JHTR01000002.1_prot_KDB18467.1_709]	787.23	23.57	1	22	22	55	0.955679	1.01044	1.03264	0.963893	1.03981	1.01757	1260	135.263	6.02393	1.0075	0.826727
UV8b_4896	[locus_tag=UV8b_4896] [protein=putative TOM1 protein] [protein_id=KDB14301.1] [location=complement(join(388495..388589,388674..392795,392850..393029,393118..393180,393234..400824,400923..400970))] [gbkey=CDS] - [JHTR01000024.1_prot_KDB14301.1_4896]	786.771	9.55	2	32	34	51	1.0076	1.01747	1.01978	0.975171	0.972998	1.00618	4032	449.383	5.21143	0.970278	0.0564975
UV8b_1702	[locus_tag=UV8b_1702] [protein=60S ribosomal protein L2] [protein_id=KDB17445.1] [location=join(551833..551881,551964..552071,552185..552666,552729..552854)] [gbkey=CDS] - [JHTR01000006.1_prot_KDB17445.1_1702]	786.064	54.33	1	12	12	62	1.00462	1.03964	1.08217	0.929551	1.00862	0.945879	254	27.4328	10.8872	0.922472	0.0701133
UV8b_5754	[locus_tag=UV8b_5754] [protein=mitochondrial targeting protein (Mas1)] [protein_id=KDB13375.1] [location=join(192189..192224,192285..192354,192427..193251,193325..193641)] [gbkey=CDS] - [JHTR01000032.1_prot_KDB13375.1_5754]	779.911	31.33	1	12	12	44	0.95941	0.986383	0.998808	1.01484	1.05088	1.02568	415	45.6925	6.48096	1.04986	0.0362286
UV8b_6037	[locus_tag=UV8b_6037] [protein=nucleoside diphosphate kinase A] [protein_id=KDB13037.1] [location=join(52630..52693,52822..52946,53148..53191,53257..53315,53370..53414,53468..53533,53590..53789)] [gbkey=CDS] - [JHTR01000036.1_prot_KDB13037.1_6037]	778.547	32.5	1	8	8	50	1.00572	1.06325	1.18641	0.884966	0.961719	0.884476	200	22.1111	7.1665	0.838969	0.0418013
UV8b_8411	[locus_tag=UV8b_8411] [protein=hypothetical protein] [protein_id=KDB10744.1] [location=join(1532..1723,4156..4484,4594..5698,5758..5775)] [gbkey=CDS] - [JHTR01000264.1_prot_KDB10744.1_8411]	775.223	36.93	1	16	16	43	0.973345	0.987006	0.99399	0.995257	1.03337	1.03027	547	58.686	5.96045	1.03539	0.0629829
UV8b_1508	[locus_tag=UV8b_1508] [protein=40S ribosomal protein S14 (CRP2)] [protein_id=KDB17624.1] [location=complement(join(481708..481859,481940..482100,482158..482254,482341..482404))] [gbkey=CDS] - [JHTR01000005.1_prot_KDB17624.1_1508]	771.777	27.39	1	6	6	30	1.04175	1.04163	1.0507	0.93296	0.972163	0.933029	157	16.6759	10.5942	0.905578	0.00181288
UV8b_947	[locus_tag=UV8b_947] [protein=putative morphogenesis protein (Msb1)] [protein_id=KDB18099.1] [location=complement(join(327090..327193,327282..329611,329687..329915,329983..330076,330137..330282,330366..330552))] [gbkey=CDS] - [JHTR01000003.1_prot_KDB18099.1_947]	771.672	21.57	1	19	19	47	0.991442	1.0095	1.04225	0.956271	1.01865	0.96953	1029	112.003	6.26514	0.967555	0.243881
UV8b_2808	[locus_tag=UV8b_2808] [protein=elicitor protein] [protein_id=KDB16352.1] [location=join(394864..394912,395095..395253,395361..395465,395554..395617,395735..396320)] [gbkey=CDS] - [JHTR01000011.1_prot_KDB16352.1_2808]	771.189	45	2	13	13	37	0.92951	1.0158	1.10182	0.877826	1.07557	0.971505	320	34.2771	9.71533	0.95989	0.619164
UV8b_6167	[locus_tag=UV8b_6167] [protein=urease accessory protein ureG] [protein_id=KDB12965.1] [location=complement(join(107102..107744,107943..108118))] [gbkey=CDS] - [JHTR01000037.1_prot_KDB12965.1_6167]	770.218	29.78	1	6	6	26	1.06042	1.05657	1.07865	0.940896	0.955212	0.932808	272	29.0328	6.32861	0.885244	0.00020594
UV8b_2890	[locus_tag=UV8b_2890] [protein=BTB/POZ domain protein] [protein_id=KDB16434.1] [location=complement(join(616378..616508,616596..617022,617241..617561))] [gbkey=CDS] - [JHTR01000011.1_prot_KDB16434.1_2890]	763.722	30.14	1	8	8	26	0.940809	0.967798	0.97427	1.02642	1.09453	1.04941	292	31.9658	5.18604	1.09972	0.0130165
UV8b_2858	[locus_tag=UV8b_2858] [protein=hypothetical protein] [protein_id=KDB16402.1] [location=join(517830..517853,517930..517959,518014..518886)] [gbkey=CDS] - [JHTR01000011.1_prot_KDB16402.1_2858]	761.639	47.73	1	8	8	23	1.02622	1.06137	1.08862	0.950244	0.970278	0.890001	308	31.0083	4.70361	0.884865	0.0155396
UV8b_3360	[locus_tag=UV8b_3360] [protein=40S ribosomal protein S2] [protein_id=KDB15720.1] [location=join(241919..242170,242508..242765,243000..243257)] [gbkey=CDS] - [JHTR01000014.1_prot_KDB15720.1_3360]	760.414	44.31	1	10	10	45	1.0223	1.05633	1.09068	0.906203	0.983757	0.929354	255	27.7081	10.5063	0.889567	0.0182922
UV8b_7682	[locus_tag=UV8b_7682] [protein=cystathionine beta-synthase] [protein_id=KDB11459.1] [location=complement(join(71534..72821,72874..73136))] [gbkey=CDS] - [JHTR01000068.1_prot_KDB11459.1_7682]	751.273	30.81	1	10	10	31	1.01154	0.994147	0.978891	1.01085	0.951179	1.0146	516	55.1779	6.68311	0.997337	0.912362
UV8b_7752	[locus_tag=UV8b_7752] [protein=40S ribosomal protein S12] [protein_id=KDB11439.1] [location=join(138778..139018,139111..139235)] [gbkey=CDS] - [JHTR01000071.1_prot_KDB11439.1_7752]	740.483	52.07	1	7	7	38	1.08507	1.02486	1.05797	0.938517	0.890089	0.942157	121	13.55	7.69385	0.874637	0.00541972
UV8b_4935	[locus_tag=UV8b_4935] [protein=ser/Thr protein phosphatase] [protein_id=KDB14340.1] [location=complement(join(495199..497078,497146..497365))] [gbkey=CDS] - [JHTR01000024.1_prot_KDB14340.1_4935]	737.434	28.04	1	14	14	30	1.04219	1.02427	0.969126	0.985645	0.939157	1.0118	699	74.2906	9.0708	0.967391	0.341203
UV8b_2958	[locus_tag=UV8b_2958] [protein=hypothetical protein] [protein_id=KDB16028.1] [location=complement(join(156954..157026,157085..157370,157427..157513,157628..157710,157789..158123,158712..158804,158870..158932))] [gbkey=CDS] - [JHTR01000012.1_prot_KDB16028.1_2958]	735.083	24.48	1	12	12	85	1.02308	1.04725	1.03189	0.953781	0.969724	0.952468	339	37.5642	5.94775	0.927068	0.00110033
UV8b_5740	[locus_tag=UV8b_5740] [protein=histidine kinase 1] [protein_id=KDB13361.1] [location=join(143858..144698,144891..144923,144999..147595,147695..148144)] [gbkey=CDS] - [JHTR01000032.1_prot_KDB13361.1_5740]	728.961	17.84	1	16	16	30	0.99867	1.00018	1.05553	0.974146	1.01859	0.987262	1306	142.743	5.75732	0.975649	0.339588
UV8b_5228	[locus_tag=UV8b_5228] [protein=heat shock protein 70-like protein] [protein_id=KDB13894.1] [location=204804..208190] [gbkey=CDS] - [JHTR01000028.1_prot_KDB13894.1_5228]	728.754	17.82	1	19	19	49	1.0069	1.01146	1.01589	0.977434	0.995935	0.995229	1128	123.35	8.1626	0.978361	0.0292916
UV8b_716	[locus_tag=UV8b_716] [protein=L-threonine 3-dehydrogenase] [protein_id=KDB18474.1] [location=join(642783..642965,643021..643204,643261..643342,643406..643503,643565..643707)] [gbkey=CDS] - [JHTR01000002.1_prot_KDB18474.1_716]	727.832	35.81	1	7	7	31	1.06872	1.07665	1.1278	0.919431	0.894726	0.901887	229	25.0089	7.76709	0.82979	0.000736441
UV8b_992	[locus_tag=UV8b_992] [protein=amidase protein] [protein_id=KDB18144.1] [location=complement(join(500703..501754,501819..501996,502606..502857,502941..504324,504774..504965,505044..505170,505396..505456))] [gbkey=CDS] - [JHTR01000003.1_prot_KDB18144.1_992]	725.666	17.48	1	17	18	44	0.997273	0.998382	0.95838	1.02954	0.995055	1.01519	1081	119.829	8.90967	1.02903	0.158713
UV8b_7676	[locus_tag=UV8b_7676] [protein=asparaginyl-tRNA synthetase] [protein_id=KDB11531.1] [location=168321..169910] [gbkey=CDS] - [JHTR01000067.1_prot_KDB11531.1_7676]	725.37	34.03	1	18	18	49	1.01266	1.01877	1.0371	0.972477	1.00919	0.970912	529	60.0166	6.27783	0.962214	0.0560871
UV8b_1253	[locus_tag=UV8b_1253] [protein=ornithine aminotransferase] [protein_id=KDB17886.1] [location=complement(join(374175..374312,374389..375090,375281..375819,376153..376309))] [gbkey=CDS] - [JHTR01000004.1_prot_KDB17886.1_1253]	722.897	25.24	1	12	12	36	1.04829	1.03972	1.0168	0.959056	0.914508	0.969837	511	55.4955	7.82568	0.915807	0.010831
UV8b_5470	[locus_tag=UV8b_5470] [protein=60S ribosomal protein L27a] [protein_id=KDB13638.1] [location=join(144158..144189,144378..144486,144565..144654,144858..145076)] [gbkey=CDS] - [JHTR01000030.1_prot_KDB13638.1_5470]	721.112	44.97	1	7	7	50	1.0237	1.03465	1.06665	0.944078	0.932153	0.951163	149	16.7961	10.5942	0.904768	0.00210991
UV8b_596	[locus_tag=UV8b_596] [protein=leucyl-tRNA synthetase] [protein_id=KDB18354.1] [location=complement(273066..276479)] [gbkey=CDS] - [JHTR01000002.1_prot_KDB18354.1_596]	715.123	24.89	2	21	22	44	1.03964	1.01893	1.00859	0.977301	0.984636	0.962592	1137	127.179	7.10791	0.953497	0.0131917
UV8b_2443	[locus_tag=UV8b_2443] [protein=importin alpha subunit] [protein_id=KDB16852.1] [location=join(669474..669707,670013..670522,670592..671503)] [gbkey=CDS] - [JHTR01000009.1_prot_KDB16852.1_2443]	713.364	24.14	1	13	13	31	1.01913	1.0441	1.0456	0.935286	0.96814	0.952634	551	60.3035	5.09717	0.918695	0.0027541
UV8b_4741	[locus_tag=UV8b_4741] [protein=hypothetical protein] [protein_id=KDB14470.1] [location=join(397107..397409,397487..398863)] [gbkey=CDS] - [JHTR01000023.1_prot_KDB14470.1_4741]	707.862	38.64	1	18	18	34	0.927573	0.935287	0.977258	1.02353	1.08185	1.04555	559	62.4439	6.97607	1.10944	0.0107314
UV8b_6972	[locus_tag=UV8b_6972] [protein=Tryptophan synthase] [protein_id=KDB12148.1] [location=join(45961..46155,46220..46452,46557..47475,47557..48360)] [gbkey=CDS] - [JHTR01000049.1_prot_KDB12148.1_6972]	704.739	30.17	1	16	16	31	1.00906	1.03822	1.03562	0.957232	0.992865	0.972766	716	76.7506	6.69775	0.948088	0.0184943
UV8b_413	[locus_tag=UV8b_413] [protein=putative 40S ribosomal protein S3] [protein_id=KDB19022.1] [location=join(1706181..1706203,1706454..1707204)] [gbkey=CDS] - [JHTR01000001.1_prot_KDB19022.1_413]	704.403	38.13	1	8	9	37	1.05474	1.06022	1.01414	0.971982	0.922306	0.954715	257	28.1717	9.24658	0.910486	0.0105094
UV8b_7931	[locus_tag=UV8b_7931] [protein=isocitrate dehydrogenase] [protein_id=KDB11198.1] [location=complement(join(43297..43721,43809..44345,44451..44865))] [gbkey=CDS] - [JHTR01000077.1_prot_KDB11198.1_7931]	701.435	31.88	1	13	14	43	1.01581	1.04417	1.05089	0.94561	0.974892	0.990219	458	51.0402	8.44092	0.935661	0.0169617
UV8b_5373	[locus_tag=UV8b_5373] [protein=putative serine/threonine phosphatase 2C ptc2] [protein_id=KDB13766.1] [location=complement(join(198953..199341,199454..199714,199791..200027,200101..200185,200292..200365,200517..200781))] [gbkey=CDS] - [JHTR01000029.1_prot_KDB13766.1_5373]	698.043	27.75	1	10	10	34	0.946811	0.965719	1.01118	0.983001	1.08923	1.02826	436	47.3946	4.75439	1.06047	0.17912
UV8b_7264	[locus_tag=UV8b_7264] [protein=coatomer beta' subunit] [protein_id=KDB11841.1] [location=join(16035..16052,16246..16330,16419..17880,18061..19081)] [gbkey=CDS] - [JHTR01000057.1_prot_KDB11841.1_7264]	697.944	20.67	1	14	14	32	0.964236	0.989365	1.00652	0.982141	1.04413	1.01425	861	95.5242	4.89404	1.02716	0.28449
UV8b_4214	[locus_tag=UV8b_4214] [protein=myo-inositol-phosphate synthase] [protein_id=KDB15068.1] [location=join(498265..499583,499710..500007)] [gbkey=CDS] - [JHTR01000019.1_prot_KDB15068.1_4214]	695.985	23.05	1	10	10	38	0.948293	0.925614	0.932509	1.07707	1.08372	1.06978	538	58.9868	6.37939	1.15114	5.51925e-05
UV8b_7443	[locus_tag=UV8b_7443] [protein=hypothetical protein] [protein_id=KDB11734.1] [location=complement(join(126192..126240,126335..129087,129167..129277))] [gbkey=CDS] - [JHTR01000061.1_prot_KDB11734.1_7443]	693.548	27.73	1	30	32	58	1.00982	1.02993	1.02551	0.962533	0.954062	0.976306	970	110.948	9.27588	0.943772	0.00296775
UV8b_4611	[locus_tag=UV8b_4611] [protein=ABC multidrug transporter Mdr1] [protein_id=KDB14561.1] [location=join(504474..506250,506321..508554)] [gbkey=CDS] - [JHTR01000022.1_prot_KDB14561.1_4611]	690.094	11.98	2	12	13	31	0.85061	0.857799	0.861349	1.10398	1.19589	1.19356	1336	145.877	6.84424	1.35944	0.000536296
UV8b_4747	[locus_tag=UV8b_4747] [protein=protein HMF1] [protein_id=KDB14476.1] [location=complement(join(410459..410575,410644..410847,410954..410967,411058..411241))] [gbkey=CDS] - [JHTR01000023.1_prot_KDB14476.1_4747]	689.857	40.12	1	4	4	34	0.945212	0.993554	1.01336	0.973547	1.06576	1.04762	172	18.5445	8.98291	1.04566	0.265205
UV8b_6801	[locus_tag=UV8b_6801] [protein=S-adenosylmethionine synthetase] [protein_id=KDB12314.1] [location=complement(join(45670..46131,46263..46928,47021..47077))] [gbkey=CDS] - [JHTR01000046.1_prot_KDB12314.1_6801]	686.894	54.57	1	18	18	54	1.0347	1.03646	1.00806	1.01396	0.976354	0.963538	394	42.9041	6.34131	0.959283	0.077591
UV8b_972	[locus_tag=UV8b_972] [protein=hypothetical protein] [protein_id=KDB18124.1] [location=complement(join(422266..424403,424480..424807,424874..424987))] [gbkey=CDS] - [JHTR01000003.1_prot_KDB18124.1_972]	681.781	34.58	2	36	36	100	0.967756	0.966513	0.919106	1.06022	1.02499	1.04252	859	95.8068	9.12939	1.09615	0.00851636
UV8b_3476	[locus_tag=UV8b_3476] [protein=short chain dehydrogenase/reductase family] [protein_id=KDB15836.1] [location=complement(619309..620196)] [gbkey=CDS] - [JHTR01000014.1_prot_KDB15836.1_3476]	677.778	40.68	1	8	8	39	0.965515	0.995391	1.07146	0.937477	1.03377	0.995424	295	31.0629	6.53662	0.978335	0.630933
UV8b_681	[locus_tag=UV8b_681] [protein=NADH-ubiquinone oxidoreductase 78 kDa subunit] [protein_id=KDB18439.1] [location=complement(join(560495..560612,560717..562621,562682..562696,562762..562813,562879..562902,562966..563080))] [gbkey=CDS] - [JHTR01000002.1_prot_KDB18439.1_681]	675.05	35.31	1	18	18	43	0.994635	1.01158	0.9919	1.01918	1.00637	1.01145	742	81.1863	6.84424	1.01297	0.145899
UV8b_273	[locus_tag=UV8b_273] [protein=formate dehydrogenase] [protein_id=KDB18882.1] [location=join(835075..835325,835418..835962,836057..836397)] [gbkey=CDS] - [JHTR01000001.1_prot_KDB18882.1_273]	674.472	40.48	1	17	17	38	1.03437	0.99254	0.968606	1.02672	0.941278	0.987793	378	41.4125	6.59521	0.986739	0.693979
UV8b_265	[locus_tag=UV8b_265] [protein=vacuolar aspartyl aminopeptidase Lap4] [protein_id=KDB18874.1] [location=complement(join(814906..816195,816366..816782))] [gbkey=CDS] - [JHTR01000001.1_prot_KDB18874.1_265]	667.238	31.87	1	12	12	36	0.936317	0.947934	0.968438	1.03778	1.08565	1.03932	568	60.8496	6.60986	1.10869	0.00484184
UV8b_7727	[locus_tag=UV8b_7727] [protein=coronin-6] [protein_id=KDB11414.1] [location=join(62049..62082,62176..62264,62404..62546,62680..62826,62936..63357,63436..63472,63554..63668,63744..64622)] [gbkey=CDS] - [JHTR01000071.1_prot_KDB11414.1_7727]	662.396	36.07	1	15	15	38	1.00426	0.986453	1.00228	1.00652	1.02814	1.00876	621	68.2201	5.87158	1.01685	0.131398
UV8b_5653	[locus_tag=UV8b_5653] [protein=hypothetical protein] [protein_id=KDB13555.1] [location=complement(join(300854..301107,301283..301421))] [gbkey=CDS] - [JHTR01000031.1_prot_KDB13555.1_5653]	661.672	59.23	1	8	8	26	0.789444	0.805449	0.817993	1.13023	1.3312	1.22672	130	13.4167	6.80029	1.52852	0.00191951
UV8b_8120	[locus_tag=UV8b_8120] [protein=epimerase hydratase] [protein_id=KDB11056.1] [location=complement(join(107137..107631,107731..108165))] [gbkey=CDS] - [JHTR01000082.1_prot_KDB11056.1_8120]	660.982	29.13	1	8	8	39	0.969621	0.98941	0.991448	1.02674	1.02935	1.02909	309	34.2494	7.94287	1.04565	0.00305195
UV8b_359	[locus_tag=UV8b_359] [protein=alcohol dehydrogenase] [protein_id=KDB18968.1] [location=join(1553186..1553283,1553355..1553916,1553971..1553999,1554061..1554153,1554279..1554375)] [gbkey=CDS] - [JHTR01000001.1_prot_KDB18968.1_359]	659.61	25.34	1	5	5	25	1.19173	1.13708	1.10855	0.869919	0.815386	0.822418	292	31.756	5.8208	0.72955	0.000483863
UV8b_2117	[locus_tag=UV8b_2117] [protein=26S proteasome regulatory subunit] [protein_id=KDB17025.1] [location=join(394938..395003,395099..395352,395427..396114)] [gbkey=CDS] - [JHTR01000008.1_prot_KDB17025.1_2117]	657.059	20.3	1	7	7	23	0.993992	1.0029	0.969353	1.01955	1.00855	1.01289	335	37.5679	5.8208	1.0252	0.0771562
UV8b_7285	[locus_tag=UV8b_7285] [protein=putative class I glutamine amidotransferase] [protein_id=KDB11862.1] [location=complement(join(122028..122318,122402..122887))] [gbkey=CDS] - [JHTR01000057.1_prot_KDB11862.1_7285]	655.663	45.35	1	11	11	25	1.06426	1.04078	1.01551	0.962459	0.917416	0.934247	258	28.4737	6.80029	0.901804	0.00606943
UV8b_4850	[locus_tag=UV8b_4850] [protein=fumarylacetoacetate hydrolase] [protein_id=KDB14255.1] [location=join(221200..222142,222255..222598)] [gbkey=CDS] - [JHTR01000024.1_prot_KDB14255.1_4850]	653.812	30.37	1	12	12	36	1.04172	1.0307	1.03027	0.956616	0.963942	0.955409	428	46.5069	6.354	0.926928	8.03908e-05
UV8b_2535	[locus_tag=UV8b_2535] [protein=60S ribosomal protein L32] [protein_id=KDB16500.1] [location=complement(join(95140..95248,95316..95437,95526..95650,95903..95942))] [gbkey=CDS] - [JHTR01000010.1_prot_KDB16500.1_2535]	653.329	51.15	1	8	8	48	1.05659	1.01575	0.995931	0.995125	0.954113	0.954833	131	14.8981	11.6196	0.946484	0.0710919
UV8b_3719	[locus_tag=UV8b_3719] [protein=hypothetical protein] [protein_id=KDB15293.1] [location=complement(join(57857..57954,58062..61142,61371..69737,69865..70009))] [gbkey=CDS] - [JHTR01000016.1_prot_KDB15293.1_3719]	649.331	7.32	1	23	23	44	1.01905	1.10348	1.09164	0.889729	0.961988	0.954549	3896	409.758	4.05615	0.873093	0.0177226
UV8b_3485	[locus_tag=UV8b_3485] [protein=hypothetical protein] [protein_id=KDB15454.1] [location=join(1116..1722,1855..2882)] [gbkey=CDS] - [JHTR01000015.1_prot_KDB15454.1_3485]	648.548	29.96	1	13	13	33	1.00041	1.00701	1.03614	0.959689	1.05376	0.991594	544	57.8261	6.23975	0.987344	0.687994
UV8b_168	[locus_tag=UV8b_168] [protein=putative cell wall biogenesis protein phosphatase Ssd1] [protein_id=KDB18777.1] [location=join(525978..526128,526332..530223,530286..530325)] [gbkey=CDS] - [JHTR01000001.1_prot_KDB18777.1_168]	646.364	19.19	1	25	25	48	1.0265	1.01555	0.983045	1.00197	0.959142	0.988865	1360	149.772	7.63525	0.975166	0.24058
UV8b_3894	[locus_tag=UV8b_3894] [protein=26S protease regulatory subunit 6A] [protein_id=KDB15231.1] [location=complement(join(482975..482995,483062..483696,483787..484202,484268..484584))] [gbkey=CDS] - [JHTR01000017.1_prot_KDB15231.1_3894]	645.954	27.27	1	11	12	36	0.958958	0.978168	0.979761	1.0157	1.077	1.03842	462	51.1584	5.12256	1.07344	0.0201424
UV8b_1619	[locus_tag=UV8b_1619] [protein=2-methylcitrate dehydratase] [protein_id=KDB17735.1] [location=complement(join(806060..806673,806806..807583,807651..807773,807868..808170))] [gbkey=CDS] - [JHTR01000005.1_prot_KDB17735.1_1619]	645.616	22.15	1	13	13	47	0.988582	1.01727	1.05179	0.967717	0.999125	0.976614	605	66.3589	8.01611	0.962656	0.13728
UV8b_3438	[locus_tag=UV8b_3438] [protein=sterol 24-C-methyltransferase] [protein_id=KDB15798.1] [location=join(491961..492170,492242..492276,492345..492666,492732..493307)] [gbkey=CDS] - [JHTR01000014.1_prot_KDB15798.1_3438]	644.619	42.37	1	12	13	40	1.00597	1.00354	1.05967	0.973434	0.994676	0.986447	380	42.2449	6.34131	0.962652	0.11931
UV8b_1132	[locus_tag=UV8b_1132] [protein=putative fatty acid oxygenase] [protein_id=KDB18284.1] [location=complement(join(928827..929363,929443..931514,931586..931778,931831..932069,932141..932519))] [gbkey=CDS] - [JHTR01000003.1_prot_KDB18284.1_1132]	643.404	27.74	1	26	26	55	0.818602	0.81096	0.767804	1.21807	1.20833	1.22386	1139	126.009	7.84033	1.52262	1.42945e-05
UV8b_5328	[locus_tag=UV8b_5328] [protein=DUF89 domain-containing protein] [protein_id=KDB13994.1] [location=complement(join(507744..508836,508966..509100,509154..509284,509371..509553))] [gbkey=CDS] - [JHTR01000028.1_prot_KDB13994.1_5328]	634.213	39.38	1	17	18	44	0.988466	1.01052	1.04656	0.965517	1.01477	1.00416	513	57.2983	6.16357	0.979942	0.418474
UV8b_3637	[locus_tag=UV8b_3637] [protein=class v chitinase] [protein_id=KDB15606.1] [location=complement(join(419177..420248,420372..420472,420537..420778,420834..421378,421505..421667,421744..421870,422013..422081))] [gbkey=CDS] - [JHTR01000015.1_prot_KDB15606.1_3637]	632.261	21.76	1	15	15	40	1.06768	1.11137	1.16806	0.875473	0.880384	0.812256	772	85.7614	8.82178	0.767261	0.00204399
UV8b_6334	[locus_tag=UV8b_6334] [protein=putative alanine aminotransferase] [protein_id=KDB12840.1] [location=complement(join(232993..234044,234322..234874))] [gbkey=CDS] - [JHTR01000039.1_prot_KDB12840.1_6334]	632.2	32.96	1	13	13	46	1.00579	1.03696	1.10282	0.879647	1.00596	0.953649	534	59.1861	6.88818	0.90262	0.0929949
UV8b_4063	[locus_tag=UV8b_4063] [protein=methionyl-tRNA synthetase] [protein_id=KDB14917.1] [location=complement(23046..24983)] [gbkey=CDS] - [JHTR01000019.1_prot_KDB14917.1_4063]	629.771	23.57	1	10	12	33	0.983188	0.98399	1.03302	0.995372	1.03519	0.987984	645	72.1964	7.15186	1.00612	0.795279
UV8b_5626	[locus_tag=UV8b_5626] [protein=threonyl-tRNA synthetase] [protein_id=KDB13528.1] [location=join(201204..201329,201421..201502,201589..201804,201889..201927,202133..202395,202486..203061,203228..203888,204894..205015,205104..205271)] [gbkey=CDS] - [JHTR01000031.1_prot_KDB13528.1_5626]	626.211	24.53	1	16	16	41	1.06429	1.03388	1.03556	0.945264	0.937157	0.948239	750	84.6911	8.32373	0.903285	0.000631001
UV8b_2238	[locus_tag=UV8b_2238] [protein=ribitol kinase] [protein_id=KDB17146.1] [location=complement(join(839643..840716,840835..841404,841491..841616,841825..841872))] [gbkey=CDS] - [JHTR01000008.1_prot_KDB17146.1_2238]	625.141	17.85	1	7	7	26	1.0388	0.986002	0.944962	1.04047	0.952369	1.03348	605	66.3082	5.31299	1.01904	0.65577
UV8b_3814	[locus_tag=UV8b_3814] [protein=Aha1 domain family] [protein_id=KDB15388.1] [location=complement(join(348658..348676,348739..349391,349478..349560,349628..349850))] [gbkey=CDS] - [JHTR01000016.1_prot_KDB15388.1_3814]	623.472	43.08	2	12	12	28	1.00199	1.00601	1.0278	0.963078	1.01051	0.991476	325	36.3704	5.46533	0.976702	0.213336
UV8b_1455	[locus_tag=UV8b_1455] [protein=Vacuolar ATP synthase subunit B] [protein_id=KDB17571.1] [location=complement(join(292530..293337,293411..293736,293803..293964,294026..294061,294120..294139,294204..294288,294367..294465))] [gbkey=CDS] - [JHTR01000005.1_prot_KDB17571.1_1455]	621.795	36.4	1	16	16	44	0.995075	0.973304	0.974484	1.04176	1.01059	1.02265	511	56.549	5.61768	1.0449	0.0186294
UV8b_1466	[locus_tag=UV8b_1466] [protein=ubiquinol-cytochrome-c reductase complex core protein 2] [protein_id=KDB17582.1] [location=complement(join(324336..324431,324504..325348,325408..325582,325688..325918))] [gbkey=CDS] - [JHTR01000005.1_prot_KDB17582.1_1466]	621.751	25	1	8	9	40	0.980099	1.02134	1.01794	0.977903	1.05057	0.98208	448	46.9768	9.15869	0.997079	0.918569
UV8b_4461	[locus_tag=UV8b_4461] [protein=hypothetical protein] [protein_id=KDB14605.1] [location=complement(join(111246..111351,111540..113124,113211..113637))] [gbkey=CDS] - [JHTR01000021.1_prot_KDB14605.1_4461]	619.177	32.48	1	20	20	44	1.02752	1.03554	1.01663	0.982947	0.967994	0.959771	705	77.709	8.60205	0.945131	0.00295906
UV8b_2776	[locus_tag=UV8b_2776] [protein=ubiquitin-activating enzyme E1 1] [protein_id=KDB16320.1] [location=complement(join(269746..270474,270542..272531,272593..272969,273147..273152))] [gbkey=CDS] - [JHTR01000011.1_prot_KDB16320.1_2776]	613.79	17.72	2	21	21	53	0.989817	0.990057	0.987681	1.00175	1.01729	1.01444	1033	114.951	5.23682	1.02221	0.0104671
UV8b_3907	[locus_tag=UV8b_3907] [protein=sulfite reductase beta subunit] [protein_id=KDB15244.1] [location=join(521746..521830,522027..522175,522254..526618,526710..526739)] [gbkey=CDS] - [JHTR01000017.1_prot_KDB15244.1_3907]	612.631	19.13	2	25	26	56	1.03094	1.04194	1.04297	0.921596	0.972608	0.967449	1542	170.25	6.46826	0.918419	0.00705686
UV8b_2647	[locus_tag=UV8b_2647] [protein=putative chromosome segregation protein Cse1] [protein_id=KDB16612.1] [location=join(506192..506359,506470..506607,506664..506834,506912..508611,508743..509370)] [gbkey=CDS] - [JHTR01000010.1_prot_KDB16612.1_2647]	609.242	9.64	1	10	10	31	1.01004	1.02657	1.01239	0.954269	1.00539	0.975028	934	105.002	5.49072	0.962512	0.0724371
UV8b_5249	[locus_tag=UV8b_5249] [protein=putative SHK1 kinase-binding protein] [protein_id=KDB13915.1] [location=complement(join(272273..272353,272470..273553,273609..273782,273911..274165,274227..274240,274281..274477,274624..274756,274832..276291,276371..276983,277087..277215))] [gbkey=CDS] - [JHTR01000028.1_prot_KDB13915.1_5249]	609.119	8.92	1	11	11	32	1.01365	1.0143	1.02471	0.951589	0.99703	0.981276	1379	149.787	6.81494	0.959784	0.0412911
UV8b_5034	[locus_tag=UV8b_5034] [protein=N-acetylglucosamine-phosphate mutase] [protein_id=KDB14045.1] [location=complement(join(144392..145249,145389..146147))] [gbkey=CDS] - [JHTR01000026.1_prot_KDB14045.1_5034]	608.662	24.16	1	11	11	40	1.03746	1.02412	1.0336	0.954419	0.95829	0.971901	538	58.9688	6.87354	0.93197	0.000447625
UV8b_1328	[locus_tag=UV8b_1328] [protein=heat shock protein 101] [protein_id=KDB17961.1] [location=609565..612345] [gbkey=CDS] - [JHTR01000004.1_prot_KDB17961.1_1328]	607.43	23.11	1	20	20	37	0.997845	1.00377	1.03124	0.983168	1.0084	0.980312	926	103.139	6.15088	0.979894	0.209877
UV8b_1735	[locus_tag=UV8b_1735] [protein=glycyl-tRNA synthetase 1] [protein_id=KDB17478.1] [location=complement(732239..733909)] [gbkey=CDS] - [JHTR01000006.1_prot_KDB17478.1_1735]	607.416	23.2	1	14	14	46	1.02933	1.01628	1.01838	0.980652	0.984912	0.979954	556	62.428	6.81494	0.961334	0.0008041
UV8b_6357	[locus_tag=UV8b_6357] [protein=Sec14 cytosolic factor] [protein_id=KDB12701.1] [location=complement(join(2708..3424,3532..3655,3756..3805,4007..4174))] [gbkey=CDS] - [JHTR01000040.1_prot_KDB12701.1_6357]	599.955	40.91	1	14	14	39	1.00463	1.03926	1.03332	0.925623	0.991519	0.985989	352	39.0828	6.78564	0.943427	0.0702311
UV8b_7180	[locus_tag=UV8b_7180] [protein=acetolactate synthase precursor] [protein_id=KDB11951.1] [location=join(86277..86467,86791..86858,86964..88652,88757..88818)] [gbkey=CDS] - [JHTR01000054.1_prot_KDB11951.1_7180]	599.824	26.16	1	15	15	45	1.06486	1.04637	1.0001	0.982183	0.930095	0.942507	669	72.1852	8.5874	0.917546	0.026275
UV8b_3212	[locus_tag=UV8b_3212] [protein=putative mitochondrial translation initiation factor IF-2] [protein_id=KDB15900.1] [location=complement(join(267742..267988,268150..270130,270196..270700,270828..271295))] [gbkey=CDS] - [JHTR01000013.1_prot_KDB15900.1_3212]	598.911	22.05	2	24	27	56	1.01687	1.01729	1.02321	0.976881	0.980101	0.977099	1066	117.195	5.8208	0.959675	5.72173e-05
UV8b_4366	[locus_tag=UV8b_4366] [protein=RNase L inhibitor of the ABC superfamily] [protein_id=KDB14843.1] [location=join(350520..350539,350789..351147,351208..352538,352610..352819)] [gbkey=CDS] - [JHTR01000020.1_prot_KDB14843.1_4366]	598.441	31.61	1	15	15	41	1.04669	1.0252	1.00532	0.997021	0.938598	0.988442	639	71.66	7.85498	0.95023	0.0790628
UV8b_1468	[locus_tag=UV8b_1468] [protein=putative mitochondrial carrier protein YHM1/SHM1] [protein_id=KDB17584.1] [location=join(329939..330005,330109..330146,330222..330263,330364..330611,330744..330921,331013..331267,331371..331460)] [gbkey=CDS] - [JHTR01000005.1_prot_KDB17584.1_1468]	597.562	18.03	1	5	5	19	0.997421	0.997082	1.04507	0.963394	1.04017	1.03969	305	33.2576	10.1987	1.00121	0.969448
UV8b_1060	[locus_tag=UV8b_1060] [protein=aspartyl-tRNA synthetase] [protein_id=KDB18212.1] [location=join(707606..708334,708403..708769,708904..709499)] [gbkey=CDS] - [JHTR01000003.1_prot_KDB18212.1_1060]	591.386	33.39	1	13	13	36	0.968474	0.991069	1.04741	0.960625	1.0727	1.00383	563	61.5515	6.0874	1.01004	0.81461
UV8b_6078	[locus_tag=UV8b_6078] [protein=matrix AAA protease MAP-1] [protein_id=KDB13078.1] [location=complement(join(174663..175474,175604..177386,178207..179211))] [gbkey=CDS] - [JHTR01000036.1_prot_KDB13078.1_6078]	591.032	20.52	1	23	23	39	1.00525	1.0044	0.979853	1.01418	0.989505	1.01752	1199	133.198	6.68311	1.0106	0.433218
UV8b_1908	[locus_tag=UV8b_1908] [protein=Pyridoxine biosynthesis protein PDX1] [protein_id=KDB17311.1] [location=575079..576017] [gbkey=CDS] - [JHTR01000007.1_prot_KDB17311.1_1908]	590.477	28.85	1	8	8	23	1.05183	1.06199	0.955031	0.997827	0.924042	0.984441	312	32.5706	5.94775	0.947035	0.256376
UV8b_7674	[locus_tag=UV8b_7674] [protein=hypothetical protein] [protein_id=KDB11529.1] [location=complement(165030..165548)] [gbkey=CDS] - [JHTR01000067.1_prot_KDB11529.1_7674]	590.4	44.19	1	11	11	40	0.9622	0.982007	0.978062	1.01286	1.05053	1.03555	172	19.3651	6.80029	1.06046	0.00926637
UV8b_8142	[locus_tag=UV8b_8142] [protein=DUF1620-domain-containing protein] [protein_id=KDB11014.1] [location=join(51429..54431,54666..54710)] [gbkey=CDS] - [JHTR01000083.1_prot_KDB11014.1_8142]	589.605	20.59	1	15	16	27	1.02179	1.0043	1.00417	0.987988	0.960859	1.00167	1015	106.574	7.40088	0.973684	0.11715
UV8b_1480	[locus_tag=UV8b_1480] [protein=60S ribosomal protein L15] [protein_id=KDB17596.1] [location=join(366537..366576,366648..366798,366875..367003,367055..367564,367955..367977,368079..368170,368499..368655,368779..369146)] [gbkey=CDS] - [JHTR01000005.1_prot_KDB17596.1_1480]	588.554	21.06	2	11	11	45	1.08046	1.07488	1.09221	0.915505	0.88442	0.923799	489	56.3173	9.90576	0.838702	0.000179257
UV8b_1779	[locus_tag=UV8b_1779] [protein=putative transcription factor BTF3a] [protein_id=KDB17182.1] [location=complement(join(109029..109258,109501..109673,109742..109881,109998..110033))] [gbkey=CDS] - [JHTR01000007.1_prot_KDB17182.1_1779]	587.28	40.1	1	6	6	31	0.989299	1.03229	1.02858	0.951279	1.00465	0.970828	192	21.266	8.55811	0.959539	0.118945
UV8b_188	[locus_tag=UV8b_188] [protein=Farnesyl pyrophosphate synthetase] [protein_id=KDB18797.1] [location=join(615883..616046,616133..616370,616585..617508)] [gbkey=CDS] - [JHTR01000001.1_prot_KDB18797.1_188]	583.822	24.94	1	13	13	32	1.04499	1.03209	1.02479	0.976454	0.95729	0.955329	441	48.9179	5.26221	0.931395	0.00137725
UV8b_4018	[locus_tag=UV8b_4018] [protein=glutamyl-tRNA synthetase] [protein_id=KDB15178.1] [location=complement(join(407596..409123,409179..409546))] [gbkey=CDS] - [JHTR01000018.1_prot_KDB15178.1_4018]	582.572	32.33	2	19	19	36	1.02487	1.0401	1.08816	0.920053	1.0124	0.943468	631	72.0416	7.07861	0.912084	0.0515627
UV8b_6091	[locus_tag=UV8b_6091] [protein=cytochrome-c oxidase chain VI] [protein_id=KDB13091.1] [location=join(214046..214209,214474..214519,214577..214694,214825..214943)] [gbkey=CDS] - [JHTR01000036.1_prot_KDB13091.1_6091]	582.191	66.22	1	8	8	29	0.946469	1.00239	0.930139	1.04777	1.0323	1.03536	148	16.7685	6.20166	1.08213	0.0244182
UV8b_7641	[locus_tag=UV8b_7641] [protein=succinyl-CoA ligase alpha-chain precursor] [protein_id=KDB11496.1] [location=join(64393..64556,64633..64661,64755..64881,64955..65043,65122..65711)] [gbkey=CDS] - [JHTR01000067.1_prot_KDB11496.1_7641]	580.921	26.51	1	8	8	34	1.06171	1.03805	1.02351	0.970853	0.948342	0.946232	332	34.48	8.39697	0.917447	0.00324068
UV8b_7222	[locus_tag=UV8b_7222] [protein=Long-chain acyl-CoA synthetases & Acyl-protein synthetase] [protein_id=KDB11897.1] [location=join(30823..31265,31415..31836,31925..33051,33162..33251)] [gbkey=CDS] - [JHTR01000056.1_prot_KDB11897.1_7222]	580.187	24.39	1	13	13	48	0.975974	1.01695	0.985148	0.997412	0.9998	1.0144	693	76.0965	7.34229	1.01126	0.454195
UV8b_2570	[locus_tag=UV8b_2570] [protein=importin beta-3 subunit] [protein_id=KDB16535.1] [location=join(205556..205738,205796..206015,206093..206268,206397..206769,207036..208930)] [gbkey=CDS] - [JHTR01000010.1_prot_KDB16535.1_2570]	579.298	15.19	1	10	10	23	1.00235	0.999464	0.999481	1.02683	0.967604	0.999066	948	105.175	4.729	0.997402	0.886791
UV8b_5025	[locus_tag=UV8b_5025] [protein=delta 1-pyrroline-5-carboxylate dehydrogenase] [protein_id=KDB14036.1] [location=join(123407..123535,123646..123753,123900..125393)] [gbkey=CDS] - [JHTR01000026.1_prot_KDB14036.1_5025]	578.336	33.68	1	18	18	45	1.00052	1.02294	1.0628	0.948843	1.00169	0.957517	576	62.496	8.96826	0.942259	0.0722732
UV8b_445	[locus_tag=UV8b_445] [protein=putative aminopeptidase] [protein_id=KDB19054.1] [location=complement(join(1923623..1924229,1924403..1926364,1926449..1926552))] [gbkey=CDS] - [JHTR01000001.1_prot_KDB19054.1_445]	578.186	17.98	1	12	12	29	1.00737	1.03106	1.03801	0.947512	0.955315	0.99393	890	98.5272	5.94775	0.941593	0.0247695
UV8b_3178	[locus_tag=UV8b_3178] [protein=ATP synthase D chain] [protein_id=KDB15866.1] [location=join(160156..160167,160341..160736,160799..160885,160963..160992)] [gbkey=CDS] - [JHTR01000013.1_prot_KDB15866.1_3178]	577.544	39.08	1	5	5	28	0.952014	0.994461	0.982136	1.04736	1.04829	1.04159	174	19.4734	8.74854	1.07124	0.00553792
UV8b_5233	[locus_tag=UV8b_5233] [protein=stomatin-like protein] [protein_id=KDB13899.1] [location=join(225313..225484,225565..226148,226268..226561)] [gbkey=CDS] - [JHTR01000028.1_prot_KDB13899.1_5233]	575.29	36.1	2	9	9	25	0.964017	0.943454	0.875594	1.10817	1.02159	1.07204	349	37.9344	7.02002	1.15046	0.0189854
UV8b_2936	[locus_tag=UV8b_2936] [protein=isocitrate lyase] [protein_id=KDB16006.1] [location=complement(join(97129..98036,98330..98672,98777..98932,99006..99236))] [gbkey=CDS] - [JHTR01000012.1_prot_KDB16006.1_2936]	571.032	27.52	1	13	13	30	1.00578	1.02882	1.08003	0.951374	0.964018	0.959643	545	60.2772	7.15186	0.923073	0.0229857
UV8b_5111	[locus_tag=UV8b_5111] [protein=elongation factor 3] [protein_id=KDB14122.1] [location=join(389467..392078,392111..392311,392367..393087)] [gbkey=CDS] - [JHTR01000026.1_prot_KDB14122.1_5111]	570.621	10.2	1	10	11	35	0.999492	0.985146	0.976962	0.992386	1.00396	1.02726	1177	128.387	7.6499	1.02093	0.165163
UV8b_401	[locus_tag=UV8b_401] [protein=putative eukaryotic translation initiation factor subunit eIF-4F] [protein_id=KDB19010.1] [location=complement(join(1664276..1664384,1664464..1668323,1668523..1669104))] [gbkey=CDS] - [JHTR01000001.1_prot_KDB19010.1_401]	569.49	18.01	2	28	29	50	1.00917	1.06052	1.08922	0.904634	0.987337	0.950644	1516	162.514	9.53955	0.899872	0.0345371
UV8b_6519	[locus_tag=UV8b_6519] [protein=eukaryotic translation initiation factor 3 subunit 2] [protein_id=KDB12673.1] [location=join(207958..208007,208194..208791,208928..209293)] [gbkey=CDS] - [JHTR01000041.1_prot_KDB12673.1_6519]	569.431	41.54	1	10	10	24	1.01895	1.02247	1.02704	0.991868	0.988241	0.979619	337	37.6108	6.1001	0.964564	0.00110622
UV8b_266	[locus_tag=UV8b_266] [protein=short-chain dehydrogenase] [protein_id=KDB18875.1] [location=818177..819169] [gbkey=CDS] - [JHTR01000001.1_prot_KDB18875.1_266]	568.512	22.73	1	6	6	20	0.927424	0.96019	0.946911	1.03358	1.08897	1.07004	330	35.6843	9.23193	1.12632	0.00317546
UV8b_5382	[locus_tag=UV8b_5382] [protein=putative proteasome regulatory particle subunit (RpnC)] [protein_id=KDB13775.1] [location=complement(join(226330..226473,226605..228073,228102..228378))] [gbkey=CDS] - [JHTR01000029.1_prot_KDB13775.1_5382]	567.671	25.6	1	11	11	24	0.982644	0.990833	1.00177	0.991015	1.03089	1.00082	629	70.2964	7.60596	1.01596	0.297126
UV8b_624	[locus_tag=UV8b_624] [protein=T-complex protein 1 subunit gamma] [protein_id=KDB18382.1] [location=complement(join(373881..373976,374052..374689,374811..375401,375544..375752,375831..375922))] [gbkey=CDS] - [JHTR01000002.1_prot_KDB18382.1_624]	567.552	30.68	1	15	16	37	1.03638	1.01225	1.02745	0.983797	0.966941	0.956265	541	59.2828	5.89697	0.945034	0.0061583
UV8b_5759	[locus_tag=UV8b_5759] [protein=alpha-mannosidase] [protein_id=KDB13380.1] [location=join(204416..204561,204630..206370,206457..207797)] [gbkey=CDS] - [JHTR01000032.1_prot_KDB13380.1_5759]	564.054	33.21	1	29	29	51	0.963116	0.97181	0.968671	1.00676	1.06673	1.02967	1075	121.267	6.46826	1.06873	0.0196376
UV8b_3132	[locus_tag=UV8b_3132] [protein=L-Rhamnonate Dehydratase] [protein_id=KDB16202.1] [location=complement(join(665142..666154,666273..666421,666496..666529,666609..666681))] [gbkey=CDS] - [JHTR01000012.1_prot_KDB16202.1_3132]	563.803	17.3	1	7	7	25	0.857317	0.867892	0.905539	1.10516	1.2345	1.13187	422	46.6275	5.92236	1.3196	0.00263306
UV8b_488	[locus_tag=UV8b_488] [protein=glucose repressible protein Grg1] [protein_id=KDB19097.1] [location=join(2056840..2056961,2057037..2057130)] [gbkey=CDS] - [JHTR01000001.1_prot_KDB19097.1_488]	562.931	78.87	1	7	7	27	0.947316	1.00322	1.04622	0.943508	1.0934	1.0122	71	7.38467	6.94678	1.01747	0.753709
UV8b_2520	[locus_tag=UV8b_2520] [protein=G protein beta subunit] [protein_id=KDB16485.1] [location=join(36685..36814,36947..37665,37730..37819,37902..38021,39118..39288)] [gbkey=CDS] - [JHTR01000010.1_prot_KDB16485.1_2520]	562.255	37.9	4	15	16	46	0.976902	0.967212	0.995686	1.00809	1.06912	1.02035	409	45.2433	6.59521	1.05366	0.0616874
UV8b_745	[locus_tag=UV8b_745] [protein=acetyl-coenzyme A synthetase] [protein_id=KDB18503.1] [location=complement(join(731437..731847,731925..732185,732262..733424,733572..733598,733774..733797,733878..733935))] [gbkey=CDS] - [JHTR01000002.1_prot_KDB18503.1_745]	558.064	31.99	1	21	21	52	1.00247	0.985437	1.01121	1.01331	1.00192	1.00353	647	71.7957	6.46826	1.00655	0.47743
UV8b_1916	[locus_tag=UV8b_1916] [protein=lysyl-tRNA synthetase] [protein_id=KDB17319.1] [location=join(602839..603078,603193..603258,603339..603494,603571..603670,603738..603856,603926..604289,604378..604739,604831..604955,605039..605276)] [gbkey=CDS] - [JHTR01000007.1_prot_KDB17319.1_1916]	555.089	15.11	1	8	10	29	1.05019	1.02808	1.01158	0.96404	0.974899	0.960549	589	66.8905	6.34131	0.938392	0.00612377
UV8b_1511	[locus_tag=UV8b_1511] [protein=eukaryotic translation initiation factor 3] [protein_id=KDB17627.1] [location=join(486150..486495,486667..487649,487748..489010)] [gbkey=CDS] - [JHTR01000005.1_prot_KDB17627.1_1511]	554.27	18.66	1	15	15	40	0.98753	1.01641	1.05119	0.945684	1.04289	0.970502	863	97.1995	5.19873	0.96856	0.405673
UV8b_6464	[locus_tag=UV8b_6464] [protein=ThiJ/PfpI family protein] [protein_id=KDB12618.1] [location=join(27678..27816,27895..28396,28475..28709)] [gbkey=CDS] - [JHTR01000041.1_prot_KDB12618.1_6464]	553.902	36.43	1	11	11	37	1.02208	0.987315	0.994808	0.984311	1.01088	0.997002	291	31.7782	5.19873	0.996003	0.774432
UV8b_3445	[locus_tag=UV8b_3445] [protein=hypothetical protein] [protein_id=KDB15805.1] [location=complement(506355..511016)] [gbkey=CDS] - [JHTR01000014.1_prot_KDB15805.1_3445]	553.841	21.44	1	26	26	58	1.06872	1.08875	1.07262	0.905797	0.914339	0.936783	1553	171.982	5.68115	0.853512	0.000141886
UV8b_3946	[locus_tag=UV8b_3946] [protein=histidyl-tRNA synthetase precursor] [protein_id=KDB15106.1] [location=complement(131011..132846)] [gbkey=CDS] - [JHTR01000018.1_prot_KDB15106.1_3946]	551.965	20.46	1	14	14	37	1.02741	1.03923	1.03361	0.938966	0.958618	0.959074	611	67.7739	6.55127	0.921427	0.000403384
UV8b_5815	[locus_tag=UV8b_5815] [protein=putative membrane bound C2 domain protein (vp115)] [protein_id=KDB13436.1] [location=join(393291..393479,393592..393898,393986..396666,396776..398101)] [gbkey=CDS] - [JHTR01000032.1_prot_KDB13436.1_5815]	550.33	15.73	1	20	20	39	0.991342	0.979369	0.967961	1.02012	1.02147	1.00887	1500	165.11	6.63916	1.03804	0.00895994
UV8b_2534	[locus_tag=UV8b_2534] [protein=NAD+ dependent glutamate dehydrogenase] [protein_id=KDB16499.1] [location=join(84285..87403,87496..87536,90095..90277,90677..91123,91248..91372,91522..91906,91969..92042,92129..93850,93928..93990)] [gbkey=CDS] - [JHTR01000010.1_prot_KDB16499.1_2534]	549.604	14.96	1	22	22	37	0.973689	0.981095	0.973224	1.00642	1.0293	1.03446	2052	227.864	5.60498	1.04855	0.00619985
UV8b_2278	[locus_tag=UV8b_2278] [protein=glucose-6-phosphate 1-dehydrogenase (G6PD)] [protein_id=KDB16687.1] [location=join(124227..124295,124371..124391,124486..124830,124926..125865,125930..126045)] [gbkey=CDS] - [JHTR01000009.1_prot_KDB16687.1_2278]	546.08	24.19	1	14	14	49	1.00285	1.0258	1.03968	0.967118	1.01222	0.983267	496	57.1124	7.44482	0.965543	0.107013
UV8b_683	[locus_tag=UV8b_683] [protein=putative NADPH-dependent alpha-keto amide reductase] [protein_id=KDB18441.1] [location=join(566506..566580,566704..566821,566930..567639)] [gbkey=CDS] - [JHTR01000002.1_prot_KDB18441.1_683]	545.904	43	1	9	9	26	0.992255	0.998528	1.11069	0.944136	1.0289	0.964963	300	32.9951	6.69775	0.947289	0.303196
UV8b_1989	[locus_tag=UV8b_1989] [protein=prolyl-tRNA synthetase] [protein_id=KDB17392.1] [location=join(832593..833014,833119..834367)] [gbkey=CDS] - [JHTR01000007.1_prot_KDB17392.1_1989]	544.571	30.4	1	17	17	45	1.00379	1.05753	1.07726	0.903784	0.99946	0.946282	556	63.0802	6.65381	0.907902	0.0525838
UV8b_8205	[locus_tag=UV8b_8205] [protein=putative importin beta-4 subunit] [protein_id=KDB10972.1] [location=complement(join(88043..88925,89167..91483,91734..91779))] [gbkey=CDS] - [JHTR01000088.1_prot_KDB10972.1_8205]	544.128	17.76	1	16	16	40	1.0645	1.03972	1.05239	0.930185	0.905646	0.95083	1081	119.271	4.77979	0.882803	0.00116036
UV8b_5133	[locus_tag=UV8b_5133] [protein=putative KAP95 protein] [protein_id=KDB14144.1] [location=join(467891..467939,468112..468170,468308..470287,470379..470622,470710..470818,470873..471033,471250..471374)] [gbkey=CDS] - [JHTR01000026.1_prot_KDB14144.1_5133]	541.886	14.65	1	8	8	27	1.01294	0.98987	0.992469	0.989924	0.99492	0.980786	908	99.5108	4.7417	0.990101	0.303974
UV8b_2468	[locus_tag=UV8b_2468] [protein=WSC domain containing protein] [protein_id=KDB16877.1] [location=join(755291..757217,757328..758190)] [gbkey=CDS] - [JHTR01000009.1_prot_KDB16877.1_2468]	541.452	21.21	1	13	13	23	0.966068	0.958893	0.953388	1.01609	1.05011	1.03064	929	98.0179	6.93213	1.07591	0.00228134
UV8b_2480	[locus_tag=UV8b_2480] [protein=dihydrolipoyl dehydrogenase precursor] [protein_id=KDB16889.1] [location=join(790601..793150,793528..793576,794247..794326,794444..795148,795241..795858)] [gbkey=CDS] - [JHTR01000009.1_prot_KDB16889.1_2480]	541.32	12.15	2	11	13	32	1.02608	1.02034	0.996636	0.988196	0.964823	0.978114	1333	147.808	6.87354	0.963219	0.0296514
UV8b_5364	[locus_tag=UV8b_5364] [protein=60S ribosomal protein L30] [protein_id=KDB13757.1] [location=join(172105..172183,172321..172475,172693..172791)] [gbkey=CDS] - [JHTR01000029.1_prot_KDB13757.1_5364]	541.079	52.73	1	6	6	24	1.00183	1.02431	1.06489	0.923512	0.99207	0.9733	110	11.8033	9.74463	0.934603	0.0707495
UV8b_2797	[locus_tag=UV8b_2797] [protein=aspartyl aminopeptidase] [protein_id=KDB16341.1] [location=complement(join(346991..348408,348525..348582))] [gbkey=CDS] - [JHTR01000011.1_prot_KDB16341.1_2797]	539.955	50.31	1	16	16	39	0.974485	0.993763	0.971338	1.02631	1.01741	1.01629	491	53.5221	6.15088	1.04097	0.00643424
UV8b_3121	[locus_tag=UV8b_3121] [protein=50S ribosomal protein L19e] [protein_id=KDB16191.1] [location=complement(join(622969..623112,623358..623778,623840..623889))] [gbkey=CDS] - [JHTR01000012.1_prot_KDB16191.1_3121]	538.948	47.55	1	11	11	43	1.02584	1.07158	1.08381	0.912838	0.969903	0.916483	204	23.655	11.4585	0.879917	0.00754858
UV8b_2596	[locus_tag=UV8b_2596] [protein=60S ribosomal protein L20] [protein_id=KDB16561.1] [location=join(278552..278567,278668..278852,278916..279092,279154..279312)] [gbkey=CDS] - [JHTR01000010.1_prot_KDB16561.1_2596]	538.218	59.55	1	11	11	47	1.08547	1.04557	1.05993	0.900059	0.905293	0.926821	178	20.9611	10.0962	0.856222	0.000427816
UV8b_7919	[locus_tag=UV8b_7919] [protein=Esterase-like protein] [protein_id=KDB11244.1] [location=complement(join(40371..41101,41204..41468))] [gbkey=CDS] - [JHTR01000076.1_prot_KDB11244.1_7919]	538.165	25.68	1	6	6	16	0.967503	0.964938	0.972722	1.04793	1.07148	1.01742	331	34.6904	5.8208	1.07975	0.00814631
UV8b_4539	[locus_tag=UV8b_4539] [protein=T-complex protein 1 subunit eta] [protein_id=KDB14683.1] [location=complement(join(361725..362860,362939..363260,363370..363536,363691..363736))] [gbkey=CDS] - [JHTR01000021.1_prot_KDB14683.1_4539]	536.234	32.55	1	17	17	34	1.025	1.03588	1.02149	0.946147	0.971667	0.955227	556	60.6496	7.03467	0.932086	0.00127352
UV8b_3195	[locus_tag=UV8b_3195] [protein=DUF221 domain-containing protein] [protein_id=KDB15883.1] [location=join(208252..208618,208717..208837,208980..210120,210200..210680,210778..211622)] [gbkey=CDS] - [JHTR01000013.1_prot_KDB15883.1_3195]	534.597	16.77	1	13	13	38	0.895878	0.907649	0.916001	1.10397	1.16269	1.10576	984	109.792	8.71924	1.24008	0.000416506
UV8b_4536	[locus_tag=UV8b_4536] [protein=ribosomal protein subunit S4] [protein_id=KDB14680.1] [location=join(353836..354009,354115..354988,355058..356022)] [gbkey=CDS] - [JHTR01000021.1_prot_KDB14680.1_4536]	533.591	32.99	2	12	12	25	0.984171	0.991164	0.976011	1.01372	1.03774	1.01943	670	71.9854	6.39209	1.04051	0.00925597
UV8b_2817	[locus_tag=UV8b_2817] [protein=Hsp90 co-chaperone Cdc37] [protein_id=KDB16361.1] [location=join(428766..428789,428892..430199,430324..430455)] [gbkey=CDS] - [JHTR01000011.1_prot_KDB16361.1_2817]	529.215	27.1	1	11	11	31	0.957601	0.975021	0.994791	0.994671	1.08388	1.01904	487	53.0647	4.94482	1.05813	0.119333
UV8b_16	[locus_tag=UV8b_16] [protein=porphobilinogen deaminase] [protein_id=KDB18625.1] [location=68470..69447] [gbkey=CDS] - [JHTR01000001.1_prot_KDB18625.1_16]	526.774	17.23	1	4	4	18	1.01049	1.01387	1.01512	0.979806	0.990454	1.00288	325	35.3466	6.55127	0.978172	0.0314368
UV8b_2405	[locus_tag=UV8b_2405] [protein=putative ubiquitin hydrolase] [protein_id=KDB16814.1] [location=complement(join(546815..546924,546996..547125,547232..547546,547625..548054,548126..548274,548346..548995,549066..550005,550086..550545,550624..550771,550864..551095))] [gbkey=CDS] - [JHTR01000009.1_prot_KDB16814.1_2405]	521.538	26.79	1	27	27	46	1.00975	0.989341	0.965517	1.03225	1.0062	1.00039	1187	137.946	5.50342	1.02503	0.199305
UV8b_5521	[locus_tag=UV8b_5521] [protein=subtilisin-like serine protease] [protein_id=KDB13689.1] [location=complement(join(287191..287418,287493..287601,288335..289911))] [gbkey=CDS] - [JHTR01000030.1_prot_KDB13689.1_5521]	521.336	6.59	1	3	3	13	1.03254	1.03504	1.04746	0.979287	0.919956	0.965426	637	69.2044	8.1626	0.919623	0.0107361
UV8b_5423	[locus_tag=UV8b_5423] [protein=eukaryotic translation initiation factor 3 subunit 6] [protein_id=KDB13816.1] [location=join(424422..424781,424901..425815)] [gbkey=CDS] - [JHTR01000029.1_prot_KDB13816.1_5423]	520.839	26.18	1	8	8	23	0.964797	1.01439	1.06303	0.963716	1.02683	0.994765	424	48.1004	6.40479	0.981296	0.603686
UV8b_2981	[locus_tag=UV8b_2981] [protein=argininosuccinate synthase] [protein_id=KDB16051.1] [location=complement(join(220274..220560,220617..220739,220795..220818,220881..221108,221176..221230,221290..221404,221460..221547,221757..221849,221901..221924,221988..222116,222236..222249,222311..222333))] [gbkey=CDS] - [JHTR01000012.1_prot_KDB16051.1_2981]	520.224	21	1	7	8	31	0.991144	0.998415	0.95961	1.04074	1.00671	1.00631	400	44.8907	5.68115	1.03546	0.102044
UV8b_1597	[locus_tag=UV8b_1597] [protein=Sulfate adenylyltransferase] [protein_id=KDB17713.1] [location=complement(join(751387..752582,752665..752813,752879..753069))] [gbkey=CDS] - [JHTR01000005.1_prot_KDB17713.1_1597]	518.13	29.75	1	11	11	33	1.01606	1.01535	0.996609	0.976284	0.973857	0.990178	511	57.3839	8.79248	0.971037	0.0230187
UV8b_1559	[locus_tag=UV8b_1559] [protein=eukaryotic translation initiation factor 3] [protein_id=KDB17675.1] [location=complement(join(624666..625100,625289..626822,626900..627171))] [gbkey=CDS] - [JHTR01000005.1_prot_KDB17675.1_1559]	515.094	27.61	1	18	18	41	1.04078	1.05512	1.04223	0.95691	0.960395	0.954478	746	85.5198	5.18604	0.915126	5.32342e-05
UV8b_5378	[locus_tag=UV8b_5378] [protein=coatomer beta subunit] [protein_id=KDB13771.1] [location=join(213899..214203,214281..214701,214753..216751,216831..216979)] [gbkey=CDS] - [JHTR01000029.1_prot_KDB13771.1_5378]	514.748	20.59	1	19	19	39	0.991198	0.995127	1.0257	0.962077	1.02757	0.993871	957	106.541	5.47803	0.990534	0.68575
UV8b_4625	[locus_tag=UV8b_4625] [protein=putative 6-phosphogluconolactonase] [protein_id=KDB14575.1] [location=548107..548889] [gbkey=CDS] - [JHTR01000022.1_prot_KDB14575.1_4625]	511.092	48.46	1	9	9	22	0.97303	0.952619	0.92528	1.07094	1.03569	1.03896	260	28.3286	5.65576	1.10336	0.0052922
UV8b_416	[locus_tag=UV8b_416] [protein=putative Coatomer subunit delta] [protein_id=KDB19025.1] [location=join(1716636..1717013,1717081..1717274,1717340..1718144,1718237..1718326)] [gbkey=CDS] - [JHTR01000001.1_prot_KDB19025.1_416]	511.078	25.41	1	8	8	22	0.963409	0.999065	1.03805	0.965497	1.02694	1.02253	488	54.3601	5.14795	1.00481	0.877264
UV8b_5659	[locus_tag=UV8b_5659] [protein=carbamoyl-phosphate synthase arginine-specific large chain] [protein_id=KDB13561.1] [location=join(312147..312495,312655..314336,314501..315877,315992..316099)] [gbkey=CDS] - [JHTR01000031.1_prot_KDB13561.1_5659]	509.653	19.21	2	22	22	49	0.997563	1.02132	1.03782	0.968856	0.99922	1.00327	1171	128.413	5.89697	0.972077	0.149052
UV8b_7648	[locus_tag=UV8b_7648] [protein=beta-1,3-glucanosyltransferase] [protein_id=KDB11503.1] [location=complement(join(81866..82560,82691..83540,83653..83736))] [gbkey=CDS] - [JHTR01000067.1_prot_KDB11503.1_7648]	507.684	14.39	1	9	9	41	1.03806	1.03635	1.0966	0.929753	0.948927	0.937637	542	58.3744	6.22705	0.888147	0.00454296
UV8b_2609	[locus_tag=UV8b_2609] [protein=putative translation release factor erf3] [protein_id=KDB16574.1] [location=complement(join(323510..323566,323670..325423,325485..325815))] [gbkey=CDS] - [JHTR01000010.1_prot_KDB16574.1_2609]	506.568	26.09	1	15	15	36	0.983491	1.03294	0.981149	0.998924	0.97403	0.986715	713	77.821	8.42627	0.987352	0.528942
UV8b_3072	[locus_tag=UV8b_3072] [protein=spermidine synthase] [protein_id=KDB16142.1] [location=join(496755..497204,497311..497551,497972..498249)] [gbkey=CDS] - [JHTR01000012.1_prot_KDB16142.1_3072]	506.434	41.93	1	10	10	36	0.985214	1.00278	1.05347	0.977471	1.02065	0.998461	322	36.3192	5.85889	0.985244	0.56625
UV8b_544	[locus_tag=UV8b_544] [protein=hydroxymethylglutaryl-CoA synthase] [protein_id=KDB19153.1] [location=complement(join(2299779..2299982,2300042..2301114,2301241..2301328,2301497..2301562))] [gbkey=CDS] - [JHTR01000001.1_prot_KDB19153.1_544]	504.324	19.33	1	7	7	27	0.975803	1.0729	1.18062	0.880652	0.995626	0.934969	476	52.171	7.62061	0.870538	0.109145
UV8b_1789	[locus_tag=UV8b_1789] [protein=Malate synthase, glyoxysomal] [protein_id=KDB17192.1] [location=join(157730..158090,158207..159188,159368..159644)] [gbkey=CDS] - [JHTR01000007.1_prot_KDB17192.1_1789]	504.174	31.35	1	19	19	47	1.00867	1.05805	1.06677	0.956152	0.979803	0.948154	539	60.479	8.38232	0.920415	0.0152444
UV8b_7955	[locus_tag=UV8b_7955] [protein=putative acetohydroxy-acid isomeroreductase] [protein_id=KDB11222.1] [location=complement(join(114566..114593,114703..115370,115498..115569))] [gbkey=CDS] - [JHTR01000077.1_prot_KDB11222.1_7955]	503.744	35.29	1	10	10	47	0.968963	0.971342	0.988519	1.0104	1.03073	1.00794	255	28.5233	6.80029	1.04106	0.0134534
UV8b_2305	[locus_tag=UV8b_2305] [protein=putative dipeptidyl peptidase] [protein_id=KDB16714.1] [location=complement(join(209442..210214,210281..211506,211597..211721))] [gbkey=CDS] - [JHTR01000009.1_prot_KDB16714.1_2305]	502.515	23.34	1	17	17	32	0.995457	0.98817	0.973034	1.02016	0.999522	1.00528	707	78.6974	5.66846	1.0231	0.0651304
UV8b_1857	[locus_tag=UV8b_1857] [protein=ATP-dependent bile acid permease] [protein_id=KDB17260.1] [location=join(374305..374372,374508..379536)] [gbkey=CDS] - [JHTR01000007.1_prot_KDB17260.1_1857]	499.842	13.25	1	18	18	34	0.927635	0.939373	0.908529	1.08805	1.07893	1.09743	1698	186.694	7.82568	1.17614	9.89256e-05
UV8b_479	[locus_tag=UV8b_479] [protein=QDE2-like protein] [protein_id=KDB19088.1] [location=join(2031707..2031806,2032165..2032344,2032447..2033616,2033791..2035511)] [gbkey=CDS] - [JHTR01000001.1_prot_KDB19088.1_479]	499.548	19.98	1	20	20	42	1.00948	1.00724	1.01162	0.995337	0.985517	0.991431	1056	116.402	8.73389	0.981489	0.00391323
UV8b_278	[locus_tag=UV8b_278] [protein=Dynein heavy chain, cytoplasmic] [protein_id=KDB18887.1] [location=complement(join(850794..851234,851360..863661,863756..864047))] [gbkey=CDS] - [JHTR01000001.1_prot_KDB18887.1_278]	497.395	7	1	24	24	39	1.0082	1.01225	1.01191	0.989991	0.990264	0.99099	4344	492.217	6.04932	0.979846	0.000106175
UV8b_3256	[locus_tag=UV8b_3256] [protein=cell division control protein 3] [protein_id=KDB15944.1] [location=join(431517..431787,431886..431936,432006..432152,432226..432692,432761..433396)] [gbkey=CDS] - [JHTR01000013.1_prot_KDB15944.1_3256]	495.304	34.99	1	17	17	48	0.9982	1.00865	0.998026	0.98249	1.01415	1.01255	523	59.229	6.45557	1.00144	0.901216
UV8b_8245	[locus_tag=UV8b_8245] [protein=homoaconitase] [protein_id=KDB10907.1] [location=complement(join(25270..26093,26185..26263,26351..26827,26896..27258,27365..27820,27906..27920))] [gbkey=CDS] - [JHTR01000095.1_prot_KDB10907.1_8245]	495.208	17.23	1	9	9	23	0.957083	0.987589	1.00805	0.968796	1.02604	1.01289	737	79.7699	7.35693	1.01863	0.466007
UV8b_2679	[locus_tag=UV8b_2679] [protein=centromere microtubule-binding protein cbf5] [protein_id=KDB16644.1] [location=complement(join(659116..659654,659753..660384,660452..660608,660721..660885,661451..662179,662239..662399,662453..662540,662606..662852))] [gbkey=CDS] - [JHTR01000010.1_prot_KDB16644.1_2679]	494.762	19.67	1	14	14	37	1.01834	1.05141	1.0662	0.93625	0.926944	0.956752	905	98.9811	8.39697	0.899232	0.00320606
UV8b_726	[locus_tag=UV8b_726] [protein=putative ornithine carbamoyl transferase] [protein_id=KDB18484.1] [location=join(664115..664444,664504..665191,665253..665293)] [gbkey=CDS] - [JHTR01000002.1_prot_KDB18484.1_726]	493.289	24.15	1	6	6	17	1.02333	1.00028	0.96142	1.02994	0.967168	1.00518	352	37.7263	8.41162	1.00578	0.833718
UV8b_5665	[locus_tag=UV8b_5665] [protein=putative ATP dependent RNA helicase] [protein_id=KDB13567.1] [location=complement(join(334962..335505,335602..341684))] [gbkey=CDS] - [JHTR01000031.1_prot_KDB13567.1_5665]	493.267	14.67	1	25	25	38	0.97465	1.00051	1.00455	0.984734	1.0359	1.0076	2208	249.86	5.31299	1.01629	0.407949
UV8b_3164	[locus_tag=UV8b_3164] [protein=GMP synthase] [protein_id=KDB15852.1] [location=complement(join(115194..115213,115327..115399,115514..115599,115693..115725,115830..115866,115924..116033,116096..116131,116188..116233,116347..116385,116693..116791,116857..117062,117119..117301,117394..117507,117568..117637,117695..117825,117878..117910,118035..118182))] [gbkey=CDS] - [JHTR01000013.1_prot_KDB15852.1_…	492.352	36.34	1	13	13	28	0.992331	1.00718	0.988664	1.02908	0.966462	1.02189	487	53.8641	6.72705	1.00979	0.66023
UV8b_4092	[locus_tag=UV8b_4092] [protein=homoserine kinase] [protein_id=KDB14946.1] [location=complement(join(107641..107991,108131..108429,108610..109033))] [gbkey=CDS] - [JHTR01000019.1_prot_KDB14946.1_4092]	491.815	28.85	1	5	5	20	0.934761	0.944014	0.971511	1.05398	1.07061	1.06473	357	38.274	6.37939	1.11895	0.000722943
UV8b_158	[locus_tag=UV8b_158] [protein=vacuolar ATP synthase catalytic subunit A] [protein_id=KDB18767.1] [location=join(489565..489576,489671..489755,489830..491394,491504..491560)] [gbkey=CDS] - [JHTR01000001.1_prot_KDB18767.1_158]	491.763	19.41	1	12	12	43	0.960629	0.976244	0.994464	1.02013	1.0433	1.02382	572	63.4175	5.51611	1.05319	0.0128187
UV8b_8161	[locus_tag=UV8b_8161] [protein=putative oxysterol binding protein (Osh5)] [protein_id=KDB10986.1] [location=join(53119..53228,53313..54108,56109..57296)] [gbkey=CDS] - [JHTR01000085.1_prot_KDB10986.1_8161]	491.471	14.49	1	7	7	20	1.00088	0.987497	0.962715	1.01352	1.00862	1.02561	697	77.4459	8.5874	1.03275	0.0584016
UV8b_4693	[locus_tag=UV8b_4693] [protein=transesterase] [protein_id=KDB14422.1] [location=243195..244427] [gbkey=CDS] - [JHTR01000023.1_prot_KDB14422.1_4693]	490.947	22.44	1	6	6	19	0.86916	0.909396	0.94219	1.04492	1.16065	1.1583	410	44.2677	5.79541	1.23638	0.00797262
UV8b_1728	[locus_tag=UV8b_1728] [protein=curved DNA-binding protein] [protein_id=KDB17471.1] [location=join(706562..706589,706912..707100,707187..707999,708063..708292)] [gbkey=CDS] - [JHTR01000006.1_prot_KDB17471.1_1728]	488.574	27.45	2	12	13	36	1.04357	1.04888	1.03968	0.93121	0.966398	0.958872	419	45.2306	7.21045	0.911992	0.00113265
UV8b_4762	[locus_tag=UV8b_4762] [protein=RNA binding protein] [protein_id=KDB14491.1] [location=join(457885..458051,458120..458243,458326..458382)] [gbkey=CDS] - [JHTR01000023.1_prot_KDB14491.1_4762]	484.44	60.87	1	4	4	13	1.02393	1.02973	1.11363	0.987088	0.977183	0.948933	115	12.7822	6.94678	0.919776	0.0530652
UV8b_2536	[locus_tag=UV8b_2536] [protein=30S ribosomal protein S9] [protein_id=KDB16501.1] [location=join(96463..96534,96669..96740,97053..97343)] [gbkey=CDS] - [JHTR01000010.1_prot_KDB16501.1_2536]	483.576	57.64	1	9	9	43	1.04205	1.06447	1.04958	0.892017	0.968949	0.924062	144	16.0558	10.2866	0.882426	0.00601802
UV8b_350	[locus_tag=UV8b_350] [protein=homoisocitrate dehydrogenase precursor] [protein_id=KDB18959.1] [location=join(1413767..1413791,1413880..1414913)] [gbkey=CDS] - [JHTR01000001.1_prot_KDB18959.1_350]	483.188	30.4	1	9	9	25	1.01576	1.01287	0.97046	0.998898	0.970077	1.02093	352	37.8619	6.26514	0.996938	0.889941
UV8b_1517	[locus_tag=UV8b_1517] [protein=filament-forming protein] [protein_id=KDB17633.1] [location=join(504277..504568,504734..510813)] [gbkey=CDS] - [JHTR01000005.1_prot_KDB17633.1_1517]	483.007	18.94	3	37	39	59	0.970791	0.985984	1.01861	1.0015	1.04817	1.01636	2123	236.191	5.38916	1.03047	0.200054
UV8b_5237	[locus_tag=UV8b_5237] [protein=40S ribosomal protein S0] [protein_id=KDB13903.1] [location=join(233553..233722,233936..234384,234467..234687)] [gbkey=CDS] - [JHTR01000028.1_prot_KDB13903.1_5237]	482.891	40.86	1	9	9	28	1.04682	1.04377	1.05086	0.948034	0.987186	0.954089	279	30.4843	4.85596	0.919739	0.00242838
UV8b_2030	[locus_tag=UV8b_2030] [protein=26S proteasome regulatory subunit rpn1] [protein_id=KDB16938.1] [location=join(97248..97365,97428..97501,97559..100036,100124..100150)] [gbkey=CDS] - [JHTR01000008.1_prot_KDB16938.1_2030]	482.576	25.5	1	19	20	48	0.992525	1.01915	0.989685	0.965474	1.00678	0.999928	898	99.5677	5.08447	0.990276	0.572715
UV8b_7764	[locus_tag=UV8b_7764] [protein=putative phosphate transporter (Pho88)] [protein_id=KDB11371.1] [location=join(29815..30107,30233..30490,30619..30779,30935..31329)] [gbkey=CDS] - [JHTR01000072.1_prot_KDB11371.1_7764]	482.526	24.18	1	7	7	22	0.99332	1.01632	1.07906	0.939777	0.988795	0.989311	368	40.2962	9.59814	0.944697	0.134706
UV8b_786	[locus_tag=UV8b_786] [protein=Arp2/3 complex subunit] [protein_id=KDB18544.1] [location=join(877665..877919,878015..878142,878232..878451)] [gbkey=CDS] - [JHTR01000002.1_prot_KDB18544.1_786]	476.582	21.5	1	3	3	19	0.967208	0.992709	1.10299	0.969281	1.04219	0.985026	200	21.3986	6.01123	0.978317	0.663413
UV8b_5345	[locus_tag=UV8b_5345] [protein=T-complex protein 1] [protein_id=KDB13738.1] [location=join(118428..118478,118545..118596,118649..119304,119367..120209)] [gbkey=CDS] - [JHTR01000029.1_prot_KDB13738.1_5345]	475.998	31.71	1	14	14	32	0.938942	1.0032	1.08727	0.930043	1.03808	0.987573	533	56.8851	8.55811	0.975665	0.667512
UV8b_6856	[locus_tag=UV8b_6856] [protein=budding site selection protein] [protein_id=KDB12257.1] [location=complement(join(5255..5797,5918..7181,7288..7418,7488..7614,7672..7694))] [gbkey=CDS] - [JHTR01000047.1_prot_KDB12257.1_6856]	475.97	19.14	1	11	11	26	0.940187	0.981494	1.0275	1.00792	1.05253	1.02529	695	78.1772	5.36377	1.0463	0.183788
UV8b_7751	[locus_tag=UV8b_7751] [protein=40S ribosomal protein S22] [protein_id=KDB11438.1] [location=complement(join(136989..137251,137704..137836))] [gbkey=CDS] - [JHTR01000071.1_prot_KDB11438.1_7751]	475.416	43.51	1	6	6	23	0.972913	0.989261	1.11625	0.873652	0.990317	0.962238	131	14.8741	10.1108	0.918069	0.216489
UV8b_1889	[locus_tag=UV8b_1889] [protein=glycogen phosphorylase] [protein_id=KDB17292.1] [location=complement(join(512671..513081,513169..513241,513319..514235,514353..514862,514941..515206,515283..515633,515784..515946))] [gbkey=CDS] - [JHTR01000007.1_prot_KDB17292.1_1889]	473.966	14.84	1	13	13	28	0.996457	0.996063	0.986564	1.00249	1.01118	1.01159	896	101.661	6.29053	1.0155	0.0247384
UV8b_1066	[locus_tag=UV8b_1066] [protein=pyruvate dehydrogenase E1 component beta subunit] [protein_id=KDB18218.1] [location=join(727709..728104,728254..729012)] [gbkey=CDS] - [JHTR01000003.1_prot_KDB18218.1_1066]	472.668	19.27	1	5	5	17	0.987168	0.980939	0.930235	1.05557	1.02235	1.04863	384	41.4804	6.58057	1.07874	0.0212101
UV8b_6482	[locus_tag=UV8b_6482] [protein=isoleucyl-tRNA synthetase] [protein_id=KDB12636.1] [location=complement(join(89670..92557,92610..92700,93269..93466,93699..94741,94797..96498,96555..96908,96995..97069))] [gbkey=CDS] - [JHTR01000041.1_prot_KDB12636.1_6482]	471.501	9.78	1	20	20	54	1.01136	1.03888	1.07805	0.938498	0.993223	0.961103	2116	241.679	9.26123	0.92473	0.0349837
UV8b_6593	[locus_tag=UV8b_6593] [protein=aldehyde dehydrogenase] [protein_id=KDB12572.1] [location=complement(join(143195..144623,144756..145069))] [gbkey=CDS] - [JHTR01000042.1_prot_KDB12572.1_6593]	471.431	18.45	1	9	9	24	0.979721	0.988331	1.01008	0.983572	1.03455	1.05009	580	60.5423	6.55127	1.03025	0.244536
UV8b_3196	[locus_tag=UV8b_3196] [protein=carnitine acetyl transferase] [protein_id=KDB15884.1] [location=join(212949..212991,213076..214778,214909..215010)] [gbkey=CDS] - [JHTR01000013.1_prot_KDB15884.1_3196]	471.43	26.18	1	13	13	23	1.06491	1.05513	1.0319	1.01395	0.927288	0.918646	615	68.4013	7.38623	0.90734	0.0381974
UV8b_7298	[locus_tag=UV8b_7298] [protein=mannitol-1-phosphate 5-dehydrogenase] [protein_id=KDB11875.1] [location=complement(join(160654..161792,161939..161987))] [gbkey=CDS] - [JHTR01000057.1_prot_KDB11875.1_7298]	470.952	31.39	1	11	11	29	1.06365	1.05744	1.03873	0.925262	0.924511	0.926763	395	43.7665	6.06201	0.8787	7.02473e-05
UV8b_4642	[locus_tag=UV8b_4642] [protein=flavin-containing monooxygenase] [protein_id=KDB14371.1] [location=complement(join(107013..108259,108319..108976))] [gbkey=CDS] - [JHTR01000023.1_prot_KDB14371.1_4642]	469.884	19.87	1	10	10	30	1.04969	1.05913	1.04791	0.968618	0.918308	0.936412	634	70.4963	5.98584	0.894385	0.00182411
UV8b_6153	[locus_tag=UV8b_6153] [protein=argininosuccinate lyase] [protein_id=KDB12951.1] [location=complement(join(69715..70645,70695..71106,71165..71219))] [gbkey=CDS] - [JHTR01000037.1_prot_KDB12951.1_6153]	467.17	32.04	1	12	12	31	1.00591	0.984797	1.00237	1.02616	1.00216	0.974555	465	52.0793	6.30322	1.00327	0.850789
UV8b_3915	[locus_tag=UV8b_3915] [protein=dihydrolipoamide acetyltransferase component] [protein_id=KDB15252.1] [location=join(552691..553008,553105..554166)] [gbkey=CDS] - [JHTR01000017.1_prot_KDB15252.1_3915]	466.695	30.28	1	10	10	26	1.00142	1.01343	0.986031	1.02247	0.996982	1.00231	459	49.2066	5.87158	1.00696	0.564383
UV8b_6319	[locus_tag=UV8b_6319] [protein=5'-methylthioadenosine phosphorylase (Meu1)] [protein_id=KDB12825.1] [location=complement(join(190143..190546,190683..191174,191279..191306))] [gbkey=CDS] - [JHTR01000039.1_prot_KDB12825.1_6319]	465.48	37.13	1	8	8	22	1.01672	0.977532	1.02898	0.95131	0.987131	1.02373	307	33.6949	6.63916	0.979802	0.477985
UV8b_5807	[locus_tag=UV8b_5807] [protein=Calcium/calmodulin-dependent protein kinase] [protein_id=KDB13428.1] [location=join(363186..363192,363343..363394,363490..363685,363768..363924,364003..364388,364507..364848)] [gbkey=CDS] - [JHTR01000032.1_prot_KDB13428.1_5807]	463.731	36.41	1	11	11	33	1.00953	0.945274	0.929184	1.0065	1.0096	1.05346	379	43.1899	7.07861	1.06435	0.0986157
UV8b_7777	[locus_tag=UV8b_7777] [protein=T-complex protein 1 subunit epsilon] [protein_id=KDB11384.1] [location=complement(join(70636..70650,70696..71112,71180..72296,72358..72406,72474..72491,72562..72571))] [gbkey=CDS] - [JHTR01000072.1_prot_KDB11384.1_7777]	463.381	30.5	1	16	16	41	1.03385	1.02932	0.995518	0.955064	0.946404	0.982949	541	58.8337	5.87158	0.943024	0.0238038
UV8b_7289	[locus_tag=UV8b_7289] [protein=multisynthetase complex auxiliary component p43] [protein_id=KDB11866.1] [location=complement(133930..135186)] [gbkey=CDS] - [JHTR01000057.1_prot_KDB11866.1_7289]	462.73	24.88	1	12	12	38	1.07523	1.07163	1.06699	0.944436	0.905394	0.949183	418	44.66	7.98682	0.870922	0.000602089
UV8b_6706	[locus_tag=UV8b_6706] [protein=phosphoserine aminotransferase] [protein_id=KDB12482.1] [location=complement(join(199690..200059,200119..200779,200910..201159))] [gbkey=CDS] - [JHTR01000044.1_prot_KDB12482.1_6706]	462.271	27.23	1	9	9	25	1.01011	1.01753	0.976763	0.982908	0.993937	0.986226	426	46.286	6.13818	0.986241	0.347486
UV8b_410	[locus_tag=UV8b_410] [protein=protein phosphatase PP2A regulatory subunit A] [protein_id=KDB19019.1] [location=complement(join(1695045..1695401,1695473..1695760,1695890..1695980,1696043..1696302,1696396..1696887,1696978..1697129,1697228..1697333,1697524..1697589))] [gbkey=CDS] - [JHTR01000001.1_prot_KDB19019.1_410]	461.729	23.55	1	15	15	39	0.994858	1.02308	1.05299	0.936555	0.987212	0.984864	603	67.263	5.03369	0.947149	0.083121
UV8b_7910	[locus_tag=UV8b_7910] [protein=40S ribosomal protein S17] [protein_id=KDB11235.1] [location=complement(join(13273..13368,13446..13919))] [gbkey=CDS] - [JHTR01000076.1_prot_KDB11235.1_7910]	461.178	41.8	1	6	6	21	1.00315	1.01695	1.10548	0.940244	1.03365	0.970664	189	21.7736	10.1694	0.942087	0.226385
UV8b_727	[locus_tag=UV8b_727] [protein=acetolactate synthase small subunit precursor] [protein_id=KDB18485.1] [location=complement(join(665510..665690,665770..666551))] [gbkey=CDS] - [JHTR01000002.1_prot_KDB18485.1_727]	461.123	18.13	1	5	5	21	0.996262	1.0294	1.00164	0.964704	0.979849	1.00665	320	34.7889	6.53662	0.974866	0.187986
UV8b_7410	[locus_tag=UV8b_7410] [protein=D-lactate dehydrogenase 2 precursor] [protein_id=KDB11701.1] [location=complement(join(17021..17351,17412..17799,17863..17915,18853..18884,19070..20755))] [gbkey=CDS] - [JHTR01000061.1_prot_KDB11701.1_7410]	460.992	20.14	1	14	14	27	1.0092	1.00486	0.996814	0.996618	1.00333	1.01408	829	90.1601	7.73779	1.00105	0.874815
UV8b_2524	[locus_tag=UV8b_2524] [protein=ran/spi1 binding protein] [protein_id=KDB16489.1] [location=join(49196..49258,49591..49758,49889..50147,50275..50403,50484..50611)] [gbkey=CDS] - [JHTR01000010.1_prot_KDB16489.1_2524]	459.61	39.52	1	8	8	35	0.981823	1.02158	1.01623	0.974581	1.01979	1.00735	248	27.4646	5.18604	0.994067	0.76127
UV8b_6083	[locus_tag=UV8b_6083] [protein=glycogen synthase] [protein_id=KDB13083.1] [location=join(189001..189079,189140..189237,189314..189589,189706..191264,191435..191537)] [gbkey=CDS] - [JHTR01000036.1_prot_KDB13083.1_6083]	457	25.28	1	12	13	32	1.00194	0.962037	0.976266	1.0055	1.03593	1.02259	704	79.7949	6.37939	1.0421	0.0477604
UV8b_4414	[locus_tag=UV8b_4414] [protein=small nuclear ribonucleoprotein Sm D1] [protein_id=KDB14891.1] [location=516326..516586] [gbkey=CDS] - [JHTR01000020.1_prot_KDB14891.1_4414]	456.47	25.58	1	1	1	15	0.843413	0.954973	1.04402	0.981912	1.1858	1.1077	86	8.83964	11.6196	1.15234	0.157172
UV8b_628	[locus_tag=UV8b_628] [protein=glutathione-disulfide reductase] [protein_id=KDB18386.1] [location=complement(398552..399853)] [gbkey=CDS] - [JHTR01000002.1_prot_KDB18386.1_628]	454.82	25.17	1	8	8	21	0.955081	0.951941	1.00715	1.00888	1.07605	1.05555	433	47.0121	7.06396	1.07766	0.0478137
UV8b_5910	[locus_tag=UV8b_5910] [protein=isocitrate dehydrogenase subunit 2 precursor] [protein_id=KDB13150.1] [location=join(37852..37935,38007..38066,38287..38373,38462..38584,38675..39466)] [gbkey=CDS] - [JHTR01000034.1_prot_KDB13150.1_5910]	454.762	18.37	1	6	6	28	0.986618	0.988808	1.06214	0.956373	1.0374	1.04112	381	40.9583	7.73779	0.999119	0.981997
UV8b_6569	[locus_tag=UV8b_6569] [protein=NADP-dependent glycerol dehydrogenase] [protein_id=KDB12548.1] [location=join(49379..49705,49855..49972,50061..50125,50194..50599,50671..50747)] [gbkey=CDS] - [JHTR01000042.1_prot_KDB12548.1_6569]	454.511	44.24	1	13	13	41	1.05163	1.06163	1.06439	0.905589	0.940895	0.935123	330	36.5439	6.01123	0.875367	0.000340114
UV8b_3300	[locus_tag=UV8b_3300] [protein=NAD binding Rossmann fold oxidoreductase] [protein_id=KDB15988.1] [location=complement(join(572494..573541,573632..573672))] [gbkey=CDS] - [JHTR01000013.1_prot_KDB15988.1_3300]	453.126	31.22	1	9	9	32	0.988958	1.00361	1.05945	0.949569	1.02482	1.00994	362	40.1158	7.02002	0.97782	0.513058
UV8b_6169	[locus_tag=UV8b_6169] [protein=small GTPase-binding protein] [protein_id=KDB12967.1] [location=join(111408..111475,111711..111738,112007..112204,112296..112430,112600..112758)] [gbkey=CDS] - [JHTR01000037.1_prot_KDB12967.1_6169]	452.966	40	1	9	9	33	1.054	0.999322	0.958767	1.04776	0.946346	1.00046	195	21.9724	6.97607	0.994183	0.89162
UV8b_4765	[locus_tag=UV8b_4765] [protein=putative calcium P-type ATPase] [protein_id=KDB14494.1] [location=join(469912..470029,470187..470344,470442..473065,473171..473273)] [gbkey=CDS] - [JHTR01000023.1_prot_KDB14494.1_4765]	451.201	11.5	1	7	7	15	0.992832	0.993413	1.00531	0.993898	1.04571	1.02485	1000	108.299	5.43994	1.02437	0.194086
UV8b_5838	[locus_tag=UV8b_5838] [protein=heat shock 70 kd protein cognate 1] [protein_id=KDB13248.1] [location=join(82495..82633,82732..82858,82995..84441)] [gbkey=CDS] - [JHTR01000033.1_prot_KDB13248.1_5838]	450.562	29.3	1	12	12	30	1.00512	1.0195	0.995249	0.971289	0.995362	0.998281	570	61.4495	5.43994	0.981809	0.173669
UV8b_6967	[locus_tag=UV8b_6967] [protein=proteasome regulatory subunit 12] [protein_id=KDB12143.1] [location=join(33428..33745,33803..34378)] [gbkey=CDS] - [JHTR01000049.1_prot_KDB12143.1_6967]	449.239	40.07	1	9	9	21	1.01163	0.984672	0.996108	0.993884	1.02141	1.02599	297	33.116	5.47803	1.01633	0.269205
UV8b_3982	[locus_tag=UV8b_3982] [protein=cullin binding protein CanA] [protein_id=KDB15142.1] [location=complement(join(300846..301310,301416..301754,301826..304865,304952..305187))] [gbkey=CDS] - [JHTR01000018.1_prot_KDB15142.1_3982]	447.225	13.17	1	14	14	31	1.01092	1.01203	0.997377	1.01835	0.958386	0.976545	1359	146.255	5.37646	0.977799	0.29055
UV8b_4514	[locus_tag=UV8b_4514] [protein=putative succinyl-CoA ligase] [protein_id=KDB14658.1] [location=complement(256811..257878)] [gbkey=CDS] - [JHTR01000021.1_prot_KDB14658.1_4514]	445.63	28.17	1	8	8	25	0.959539	1.00339	0.994931	0.99606	1.05017	1.03016	355	38.6938	5.37646	1.04007	0.129413
UV8b_6849	[locus_tag=UV8b_6849] [protein=endoplasmic reticulum-Golgi intermediate compartment protein 3] [protein_id=KDB12362.1] [location=join(239835..240027,240168..241102,241196..241369)] [gbkey=CDS] - [JHTR01000046.1_prot_KDB12362.1_6849]	445.568	28.18	1	10	10	24	0.970203	0.978545	0.997884	0.999826	1.05125	1.02333	433	47.9529	7.47412	1.04337	0.0661145
UV8b_7374	[locus_tag=UV8b_7374] [protein=methylcitrate synthase precursor] [protein_id=KDB11786.1] [location=complement(join(94326..94821,94922..95796,95893..95940))] [gbkey=CDS] - [JHTR01000059.1_prot_KDB11786.1_7374]	442.632	19.92	1	6	8	26	1.04298	1.03028	1.0484	0.964985	0.928622	0.968272	472	51.7819	8.79248	0.916781	0.00328655
UV8b_5780	[locus_tag=UV8b_5780] [protein=valyl-tRNA synthetase] [protein_id=KDB13401.1] [location=complement(join(265748..266154,266266..266797,266862..266895,266977..267436,267508..268524,268613..269245,269319..269391,269452..269474,269536..269566))] [gbkey=CDS] - [JHTR01000032.1_prot_KDB13401.1_5780]	441.891	26.57	1	26	26	53	1.0354	1.02632	1.062	0.94266	0.943713	0.962321	1069	120.404	7.25439	0.911956	0.00182069
UV8b_7563	[locus_tag=UV8b_7563] [protein=quinone oxidoreductase] [protein_id=KDB11596.1] [location=complement(join(105905..106159,106235..106969))] [gbkey=CDS] - [JHTR01000065.1_prot_KDB11596.1_7563]	441.588	44.07	1	10	10	23	0.979105	0.979076	0.925601	1.02522	0.976373	1.0018	329	34.8684	6.55127	1.04148	0.154333
UV8b_5898	[locus_tag=UV8b_5898] [protein=aspartate aminotransferase] [protein_id=KDB13308.1] [location=complement(join(244573..245643,245915..245974,246061..246243))] [gbkey=CDS] - [JHTR01000033.1_prot_KDB13308.1_5898]	440.408	32.04	1	11	12	26	0.949371	0.962014	0.932622	1.0613	1.04849	1.05793	437	47.5621	7.13721	1.11382	0.000320201
UV8b_580	[locus_tag=UV8b_580] [protein=ADP,ATP carrier protein] [protein_id=KDB18338.1] [location=complement(join(227812..227859,227932..228395,228951..229509,229582..229904,230034..230055,230341..230379))] [gbkey=CDS] - [JHTR01000002.1_prot_KDB18338.1_580]	439.81	21.28	1	13	13	26	1.10561	1.00193	0.957619	1.00871	0.831095	0.942366	484	52.2996	9.46631	0.907676	0.236993
UV8b_3777	[locus_tag=UV8b_3777] [protein=homoserine dehydrogenase] [protein_id=KDB15351.1] [location=complement(join(262879..263933,264000..264036))] [gbkey=CDS] - [JHTR01000016.1_prot_KDB15351.1_3777]	438.618	31.4	1	10	10	28	1.05427	1.03691	1.01294	0.996552	0.934151	0.949667	363	38.33	6.16357	0.927918	0.0285459
UV8b_6364	[locus_tag=UV8b_6364] [protein=acyl-CoA dehydrogenase] [protein_id=KDB12708.1] [location=join(25727..25841,25972..27491)] [gbkey=CDS] - [JHTR01000040.1_prot_KDB12708.1_6364]	437.931	22.24	1	14	14	43	1.00947	1.03389	1.04814	0.954153	0.971151	0.967727	544	60.1295	8.19189	0.935803	0.0059924
UV8b_610	[locus_tag=UV8b_610] [protein=UDP-galactopyranose mutase] [protein_id=KDB18368.1] [location=join(313797..313813,313952..314021,314084..314164,314269..314619,314708..315133,315220..315867)] [gbkey=CDS] - [JHTR01000002.1_prot_KDB18368.1_610]	437.191	31.51	1	14	14	38	1.02097	1.05555	1.08147	0.895918	0.965001	0.936385	530	59.2317	6.15088	0.885783	0.0106877
UV8b_2176	[locus_tag=UV8b_2176] [protein=proteasome component PUP2] [protein_id=KDB17084.1] [location=join(614679..614703,614799..615310,615505..615678)] [gbkey=CDS] - [JHTR01000008.1_prot_KDB17084.1_2176]	436.221	22.88	1	4	4	12	0.97477	0.979078	1.02794	0.981658	1.03898	0.995794	236	25.7948	4.86865	1.01162	0.658735
UV8b_6036	[locus_tag=UV8b_6036] [protein=glucosidase II alpha subunit] [protein_id=KDB13036.1] [location=complement(join(48895..51731,51788..51872))] [gbkey=CDS] - [JHTR01000036.1_prot_KDB13036.1_6036]	436.191	19.73	1	21	21	43	1.03909	1.04804	1.07606	0.936094	0.951499	0.948249	973	111.036	6.30322	0.896513	0.000832381
UV8b_4895	[locus_tag=UV8b_4895] [protein=40S ribosomal protein S6] [protein_id=KDB14300.1] [location=join(386575..386937,387248..387415,387492..387587)] [gbkey=CDS] - [JHTR01000024.1_prot_KDB14300.1_4895]	434.623	35.1	1	8	8	35	1.0247	1.03873	1.06659	0.931665	0.948577	0.969034	208	23.4168	10.6235	0.910305	0.0046412
UV8b_5842	[locus_tag=UV8b_5842] [protein=IBR domain-containing protein] [protein_id=KDB13252.1] [location=join(97264..97617,98432..99262,100050..100161,100410..100493,100591..100652)] [gbkey=CDS] - [JHTR01000033.1_prot_KDB13252.1_5842]	433.579	4.79	1	2	2	16	0.961498	1.03639	1.01165	1.03661	1.00833	0.990605	480	54.4884	6.82959	1.00864	0.753632
UV8b_3293	[locus_tag=UV8b_3293] [protein=alanine racemase domain protein] [protein_id=KDB15981.1] [location=join(551056..551250,551373..551483,551565..552692)] [gbkey=CDS] - [JHTR01000013.1_prot_KDB15981.1_3293]	433.392	17.82	1	6	6	16	1.05246	1.03399	0.973635	0.987036	0.939282	0.975774	477	51.1152	7.04932	0.948369	0.131335
UV8b_7847	[locus_tag=UV8b_7847] [protein=UDP-N-acetylglucosamine pyrophosphorylase] [protein_id=KDB11318.1] [location=join(73292..74541,74612..74684)] [gbkey=CDS] - [JHTR01000074.1_prot_KDB11318.1_7847]	432.763	42.95	1	12	12	26	0.969562	0.994076	1.00061	0.999362	1.00669	0.979165	440	48.2118	6.55127	1.00707	0.606801
UV8b_4471	[locus_tag=UV8b_4471] [protein=hypothetical protein] [protein_id=KDB14615.1] [location=complement(join(130864..132270,132353..132905,132991..133124,133197..133337))] [gbkey=CDS] - [JHTR01000021.1_prot_KDB14615.1_4471]	432.696	25.4	1	18	18	44	1.00892	1.00024	1.04192	0.952608	1.03467	0.981934	744	84.9808	7.50342	0.973167	0.371834
UV8b_7936	[locus_tag=UV8b_7936] [protein=40 kDa peptidyl-prolyl cis-trans isomerase] [protein_id=KDB11203.1] [location=complement(join(64161..64921,65011..65137,65220..65444))] [gbkey=CDS] - [JHTR01000077.1_prot_KDB11203.1_7936]	431.705	25.41	1	9	9	28	0.948123	0.974562	0.991994	0.976825	1.04496	1.02037	370	39.9251	6.17627	1.04373	0.146845
UV8b_1776	[locus_tag=UV8b_1776] [protein=putative peroxisomal membrane protein] [protein_id=KDB17179.1] [location=join(104215..104332,104461..104552,104671..105036)] [gbkey=CDS] - [JHTR01000007.1_prot_KDB17179.1_1776]	430.957	36.65	1	6	6	27	0.966575	1.04399	1.13978	0.983158	0.999768	0.944067	191	20.0431	6.34131	0.929102	0.230924
UV8b_5363	[locus_tag=UV8b_5363] [protein=60S ribosomal protein L10-A-like protein] [protein_id=KDB13756.1] [location=complement(join(170805..171034,171105..171489,171707..171751))] [gbkey=CDS] - [JHTR01000029.1_prot_KDB13756.1_5363]	429.816	52.97	4	12	13	29	1.02828	1.05405	1.03636	0.938797	0.977847	0.976236	219	25.2823	10.6382	0.927594	0.00714491
UV8b_6601	[locus_tag=UV8b_6601] [protein=putative 26S proteasome regulatory subunit Rpn2] [protein_id=KDB12580.1] [location=complement(join(164034..164447,164525..167428,167486..167629))] [gbkey=CDS] - [JHTR01000042.1_prot_KDB12580.1_6601]	427.634	19.25	1	22	23	43	0.954761	0.99612	0.989995	1.01939	1.04698	1.03397	1153	125.552	5.18604	1.05422	0.0247196
UV8b_438	[locus_tag=UV8b_438] [protein=calmodulin] [protein_id=KDB19047.1] [location=complement(join(1772961..1772995,1773059..1773200,1773260..1773304))] [gbkey=CDS] - [JHTR01000001.1_prot_KDB19047.1_438]	427.294	100	1	9	9	35	0.969325	0.996859	0.996747	0.994055	1.02603	1.02958	73	8.51394	4.37354	1.02927	0.117737
UV8b_5271	[locus_tag=UV8b_5271] [protein=60S ribosomal protein L13] [protein_id=KDB13937.1] [location=complement(join(331854..332249,332438..332596,332693..332739,332828..332861,332932..332939,333323..333467))] [gbkey=CDS] - [JHTR01000028.1_prot_KDB13937.1_5271]	427.183	46.95	1	16	16	62	1.06136	1.0951	1.05732	0.907949	0.92927	0.941332	262	29.5382	10.9458	0.864575	0.00071669
UV8b_6286	[locus_tag=UV8b_6286] [protein=nucleosome assembly protein] [protein_id=KDB12925.1] [location=complement(join(254995..255045,255105..255436,255492..256211,256270..256349,256410..256453))] [gbkey=CDS] - [JHTR01000038.1_prot_KDB12925.1_6286]	426.537	26.72	1	12	12	39	1.02317	0.999565	1.00393	0.976099	0.96184	1.00383	408	46.3446	4.52588	0.971952	0.119029
UV8b_2260	[locus_tag=UV8b_2260] [protein=succinate semialdehyde dehydrogenase] [protein_id=KDB16669.1] [location=complement(join(64887..65901,66067..66436,66546..66672))] [gbkey=CDS] - [JHTR01000009.1_prot_KDB16669.1_2260]	426.18	22.47	1	8	8	18	1.08568	1.09864	1.12751	0.916203	0.868672	0.903529	503	53.6944	6.46826	0.81176	0.000383704
UV8b_3004	[locus_tag=UV8b_3004] [protein=adenylyl-sulfate kinase] [protein_id=KDB16074.1] [location=join(274865..275245,275305..275568,275791..276153)] [gbkey=CDS] - [JHTR01000012.1_prot_KDB16074.1_3004]	424.05	8.96	1	3	3	13	0.992705	1.01672	1.08977	0.989708	0.942856	0.960311	335	37.3081	6.06201	0.933428	0.0997779
UV8b_1895	[locus_tag=UV8b_1895] [protein=mitochondrial carnitine carrier] [protein_id=KDB17298.1] [location=complement(join(537445..538118,538257..538575))] [gbkey=CDS] - [JHTR01000007.1_prot_KDB17298.1_1895]	423.635	21.82	1	5	5	15	0.992983	0.990429	0.977283	1.01751	0.999993	1.00119	330	34.021	9.83252	1.01959	0.060498
UV8b_2215	[locus_tag=UV8b_2215] [protein=actin binding protein] [protein_id=KDB17123.1] [location=complement(join(752279..752403,752492..754570,754642..754837))] [gbkey=CDS] - [JHTR01000008.1_prot_KDB17123.1_2215]	422.791	22.65	1	13	13	28	1.02566	1.03289	0.995012	1.00241	0.975126	0.98461	799	83.3701	5.03369	0.970065	0.096746
UV8b_6660	[locus_tag=UV8b_6660] [protein=disulfide isomerase] [protein_id=KDB12436.1] [location=join(50508..50651,50705..51928)] [gbkey=CDS] - [JHTR01000044.1_prot_KDB12436.1_6660]	422.105	48.13	1	20	20	55	0.984049	0.992532	0.94808	1.02242	1.02842	1.04939	455	49.2536	7.73779	1.06003	0.0211484
UV8b_4729	[locus_tag=UV8b_4729] [protein=bifunctional purine biosynthesis protein] [protein_id=KDB14458.1] [location=complement(join(354649..354804,354944..356447,356616..356764))] [gbkey=CDS] - [JHTR01000023.1_prot_KDB14458.1_4729]	419.363	19.1	1	10	10	26	1.01538	1.02594	1.0804	0.931224	1.02114	0.928662	602	64.3511	7.34229	0.922897	0.0926864
UV8b_6496	[locus_tag=UV8b_6496] [protein=uroporphyrinogen decarboxylase] [protein_id=KDB12650.1] [location=complement(join(135659..135738,135823..136213,136365..136900,136984..137002))] [gbkey=CDS] - [JHTR01000041.1_prot_KDB12650.1_6496]	418.981	43.7	1	12	12	25	1.00238	1.0221	1.01569	0.97626	1.00127	0.981589	341	38.1774	6.26514	0.97334	0.0476465
UV8b_6437	[locus_tag=UV8b_6437] [protein=1,4-alpha-glucan branching enzyme] [protein_id=KDB12781.1] [location=join(260605..260683,260742..260866,260951..261050,261111..261223,261286..261478,261686..261977,262029..262364,262416..263046,263113..263148)] [gbkey=CDS] - [JHTR01000040.1_prot_KDB12781.1_6437]	417.938	22.4	1	12	12	30	0.974394	0.966435	1.01567	1.01866	1.03872	0.999372	634	72.5527	6.13818	1.03391	0.153791
UV8b_7669	[locus_tag=UV8b_7669] [protein=SIK1-like protein] [protein_id=KDB11524.1] [location=join(152536..152705,152796..153915,153987..154217)] [gbkey=CDS] - [JHTR01000067.1_prot_KDB11524.1_7669]	417.461	30.04	1	13	13	25	0.987928	1.01411	0.999779	1.0233	1.01949	1.01011	506	55.5284	9.31982	1.01702	0.116476
UV8b_7670	[locus_tag=UV8b_7670] [protein=ubiquitin] [protein_id=KDB11525.1] [location=complement(join(155369..155455,155539..155913))] [gbkey=CDS] - [JHTR01000067.1_prot_KDB11525.1_7670]	416.894	61.44	2	7	12	54	0.999445	1.06179	1.10581	0.909161	1.02493	0.953673	153	17.5654	9.78857	0.911815	0.111335
UV8b_6820	[locus_tag=UV8b_6820] [protein=alpha-tubulin] [protein_id=KDB12333.1] [location=complement(join(105973..106448,106556..107059,107146..107456,107540..107598,107753..107764))] [gbkey=CDS] - [JHTR01000046.1_prot_KDB12333.1_6820]	414.799	26.27	1	9	10	41	0.867881	0.956045	1.02976	1.01833	1.06852	1.02488	453	50.2958	5.21143	1.09043	0.156424
UV8b_932	[locus_tag=UV8b_932] [protein=NADH-cytochrome b5 reductase] [protein_id=KDB18084.1] [location=join(276526..276570,276641..277010,277158..277717)] [gbkey=CDS] - [JHTR01000003.1_prot_KDB18084.1_932]	413.598	18.52	1	4	4	15	0.889253	0.912344	0.956289	1.05585	1.13474	1.10762	324	35.3534	9.24658	1.19592	0.00404928
UV8b_7850	[locus_tag=UV8b_7850] [protein=histidine biosynthesis trifunctional protein] [protein_id=KDB11321.1] [location=complement(join(90278..90468,90599..92984))] [gbkey=CDS] - [JHTR01000074.1_prot_KDB11321.1_7850]	412.718	21.45	4	13	14	29	0.966523	0.977326	1.01004	1.00355	1.03269	1.00806	858	92.528	6.32861	1.03061	0.131122
UV8b_7759	[locus_tag=UV8b_7759] [protein=hypothetical protein] [protein_id=KDB11366.1] [location=join(14373..14741,14803..14813,14872..14975,15030..15047,15110..15302,15409..15680,15767..15876,15961..16174,16251..16356,16434..16464)] [gbkey=CDS] - [JHTR01000072.1_prot_KDB11366.1_7759]	411.17	32	1	14	14	49	1.03141	1.0397	1.03994	0.962269	0.93748	0.938321	475	51.7115	6.32861	0.912254	0.000450926
UV8b_2984	[locus_tag=UV8b_2984] [protein=putative eukaryotic translation initiation factor 3 subunit EifCj] [protein_id=KDB16054.1] [location=complement(join(227760..227775,227846..228540,228623..228717,228891..228912))] [gbkey=CDS] - [JHTR01000012.1_prot_KDB16054.1_2984]	407.127	42.55	1	14	14	31	0.996233	1.0602	1.1087	0.916631	0.997792	0.969599	275	30.5182	5.13525	0.911185	0.0808439
UV8b_5399	[locus_tag=UV8b_5399] [protein=Vid27 family protein] [protein_id=KDB13792.1] [location=complement(join(359302..361889,362051..362069))] [gbkey=CDS] - [JHTR01000029.1_prot_KDB13792.1_5399]	407.113	10.48	2	9	9	21	0.974377	0.998088	0.95056	1.01033	0.981951	1.02888	868	97.836	5.10986	1.03357	0.166204
UV8b_7536	[locus_tag=UV8b_7536] [protein=histone H4.1] [protein_id=KDB11613.1] [location=join(138226..138235,138315..138592)] [gbkey=CDS] - [JHTR01000064.1_prot_KDB11613.1_7536]	404.378	48.42	2	4	4	29	0.922702	0.966721	0.990615	0.996482	1.06052	1.04178	95	10.753	11.356	1.07595	0.0569659
UV8b_1812	[locus_tag=UV8b_1812] [protein=aspartate-semialdehyde dehydrogenase] [protein_id=KDB17215.1] [location=join(232225..232456,232694..232951,233035..233769,233957..234024)] [gbkey=CDS] - [JHTR01000007.1_prot_KDB17215.1_1812]	404.036	33.49	1	10	10	23	1.00814	1.04878	1.05664	0.963018	0.971606	0.964861	430	46.1306	7.88428	0.931244	0.00946598
UV8b_6118	[locus_tag=UV8b_6118] [protein=40s ribosomal protein S11] [protein_id=KDB13118.1] [location=complement(join(309364..309427,309840..310225,310310..310741,311530..311768,311943..312118,312183..312202))] [gbkey=CDS] - [JHTR01000036.1_prot_KDB13118.1_6118]	403.97	16.89	1	9	9	51	1.03713	1.03349	1.03548	0.981358	0.909666	0.949935	438	49.6553	8.96826	0.914642	0.0131154
UV8b_7375	[locus_tag=UV8b_7375] [protein=isocitrate lyase] [protein_id=KDB11787.1] [location=join(96950..97361,97502..98895)] [gbkey=CDS] - [JHTR01000059.1_prot_KDB11787.1_7375]	402.61	21.3	1	11	11	22	0.925908	1.02706	1.0672	0.961993	1.06609	0.977725	601	65.7601	8.35303	0.995242	0.932428
UV8b_4669	[locus_tag=UV8b_4669] [protein=ubiquitin carboxyl-terminal hydrolase 14] [protein_id=KDB14398.1] [location=complement(191930..193699)] [gbkey=CDS] - [JHTR01000023.1_prot_KDB14398.1_4669]	401.488	34.97	1	16	16	29	0.998703	0.990574	1.00122	0.999594	0.98204	1.01428	589	64.7409	5.70654	1.00181	0.863618
UV8b_2577	[locus_tag=UV8b_2577] [protein=ER-derived vesicles protein ERV14] [protein_id=KDB16542.1] [location=join(230841..230941,231043..231198,231257..231371)] [gbkey=CDS] - [JHTR01000010.1_prot_KDB16542.1_2577]	400.722	17.89	1	4	4	19	1.0177	0.988957	0.979509	1.02842	0.985142	0.994535	123	14.0943	6.50732	1.00735	0.696762
UV8b_3656	[locus_tag=UV8b_3656] [protein=glutaminyl-tRNA synthetase] [protein_id=KDB15625.1] [location=complement(join(476042..476122,476177..477012,477121..477639,477884..478271))] [gbkey=CDS] - [JHTR01000015.1_prot_KDB15625.1_3656]	400.621	23.56	1	13	13	27	0.995512	1.02837	1.05267	0.924783	1.00062	0.963988	607	69.0459	8.68994	0.939166	0.0855068
UV8b_2352	[locus_tag=UV8b_2352] [protein=dUTP pyrophosphatase] [protein_id=KDB16761.1] [location=complement(join(377069..377349,377446..377746))] [gbkey=CDS] - [JHTR01000009.1_prot_KDB16761.1_2352]	399.626	15.03	1	2	2	10	0.958772	0.952761	0.981465	1.00788	1.09813	1.06483	193	20.5716	5.65576	1.09604	0.0289373
UV8b_7414	[locus_tag=UV8b_7414] [protein=cysteine synthase] [protein_id=KDB11705.1] [location=complement(join(27233..28230,28358..28677,29927..31505,31567..31637,31691..32676,32880..32930))] [gbkey=CDS] - [JHTR01000061.1_prot_KDB11705.1_7414]	399.458	12.37	1	8	9	14	0.991605	0.973206	1.01006	0.961684	1.01398	0.984685	1334	146.516	8.25049	0.995121	0.806583
UV8b_1719	[locus_tag=UV8b_1719] [protein=polyA nuclease] [protein_id=KDB17462.1] [location=complement(join(630702..631875,631940..634483,634546..635294))] [gbkey=CDS] - [JHTR01000006.1_prot_KDB17462.1_1719]	395.664	11.96	1	14	14	26	0.974431	0.981394	0.957332	1.01956	1.02637	1.03395	1488	160.247	6.15088	1.05723	0.00255263
UV8b_6422	[locus_tag=UV8b_6422] [protein=GTP-binding protein ypt3] [protein_id=KDB12766.1] [location=join(214970..214990,215158..215557,215641..215721,215799..215932)] [gbkey=CDS] - [JHTR01000040.1_prot_KDB12766.1_6422]	395.235	31.75	1	4	4	15	0.941435	0.947149	0.953994	1.04644	1.08373	1.03173	211	23.1777	6.12549	1.11234	0.00258803
UV8b_6553	[locus_tag=UV8b_6553] [protein=cytochrome c oxidase polypeptide iv] [protein_id=KDB12532.1] [location=join(11355..11445,11546..11641,11793..12052,12140..12304)] [gbkey=CDS] - [JHTR01000042.1_prot_KDB12532.1_6553]	394.803	48.77	1	6	6	33	0.978965	0.978959	0.983626	1.00985	1.02776	1.04657	203	22.2671	6.01123	1.04849	0.0113591
UV8b_1509	[locus_tag=UV8b_1509] [protein=60S ribosomal protein L7] [protein_id=KDB17625.1] [location=join(483226..483311,483353..483464,483649..484275)] [gbkey=CDS] - [JHTR01000005.1_prot_KDB17625.1_1509]	394.009	29.93	1	10	10	40	1.04306	1.05723	0.970465	0.997173	0.927054	0.984022	274	31.7752	10.1108	0.94708	0.190726
UV8b_7901	[locus_tag=UV8b_7901] [protein=putative glycine decarboxylase P subunit] [protein_id=KDB11291.1] [location=join(123313..125965,126065..126583,126652..126713)] [gbkey=CDS] - [JHTR01000075.1_prot_KDB11291.1_7901]	393.788	18.11	2	18	18	36	0.968081	1.02576	1.0289	0.958297	1.02029	1.00917	1077	117.408	7.76709	0.988426	0.693102
UV8b_3543	[locus_tag=UV8b_3543] [protein=DNAJ domain containing protein] [protein_id=KDB15512.1] [location=complement(join(151772..151945,152065..153386,153477..153582))] [gbkey=CDS] - [JHTR01000015.1_prot_KDB15512.1_3543]	393.361	12.2	1	6	6	14	0.981626	0.988393	0.988415	1.02146	1.0041	1.03097	533	58.6699	5.92236	1.03316	0.0161869
UV8b_7539	[locus_tag=UV8b_7539] [protein=pentafunctional AROM polypeptide] [protein_id=KDB11616.1] [location=complement(join(143175..143214,143282..143547,143777..147722,147795..147922))] [gbkey=CDS] - [JHTR01000064.1_prot_KDB11616.1_7539]	393.044	10.56	1	14	14	35	1.01413	1.01418	1.01876	0.97247	0.992626	0.989855	1459	160.525	7.84033	0.969766	0.00910241
UV8b_2650	[locus_tag=UV8b_2650] [protein=vacuolar sorting protein 1] [protein_id=KDB16615.1] [location=join(524267..524319,524390..524524,524599..525985,526061..526331,526401..526485,526551..526719)] [gbkey=CDS] - [JHTR01000010.1_prot_KDB16615.1_2650]	392.026	23.03	1	13	13	32	1.02942	1.02991	1.00404	0.993493	0.968789	0.998073	699	77.0285	8.23584	0.966369	0.051261
UV8b_2906	[locus_tag=UV8b_2906] [protein=40S ribosomal protein S7] [protein_id=KDB16450.1] [location=join(656852..656936,657014..657225,657560..657642,657724..658087)] [gbkey=CDS] - [JHTR01000011.1_prot_KDB16450.1_2906]	391.764	42.51	1	11	11	36	1.06962	1.06696	1.02744	0.946078	0.92087	0.931016	247	28.3414	10.4331	0.884308	0.00140091
UV8b_7432	[locus_tag=UV8b_7432] [protein=Pre-mRNA-splicing factor RSE1] [protein_id=KDB11723.1] [location=complement(join(88149..88175,88232..89519,89714..91793,91941..92184))] [gbkey=CDS] - [JHTR01000061.1_prot_KDB11723.1_7432]	389.885	11.06	1	10	10	23	0.967671	0.988541	0.974175	1.03107	1.0103	1.02791	1212	133.148	5.17334	1.0474	0.00658938
UV8b_5621	[locus_tag=UV8b_5621] [protein=cytochrome c peroxidase precursor] [protein_id=KDB13523.1] [location=join(188830..189310,189502..189875,189989..190216)] [gbkey=CDS] - [JHTR01000031.1_prot_KDB13523.1_5621]	389.665	36.39	1	10	12	32	0.983843	0.981713	1.03926	0.988684	1.01566	0.989932	360	40.331	8.51416	0.996493	0.874031
UV8b_6509	[locus_tag=UV8b_6509] [protein=cAMP-dependent protein kinase regulatory subunit] [protein_id=KDB12663.1] [location=complement(join(173161..173862,173963..174427))] [gbkey=CDS] - [JHTR01000041.1_prot_KDB12663.1_6509]	389.227	31.19	1	9	9	22	0.994897	0.966619	1.02639	0.975019	1.04641	0.981357	388	42.4474	6.0874	1.00498	0.870766
UV8b_30	[locus_tag=UV8b_30] [protein=CobW/HypB/UreG, nucleotide-binding domain containing protein] [protein_id=KDB18639.1] [location=join(115160..115270,115319..115404,115455..115754,115820..116030,116084..116272,116325..117287)] [gbkey=CDS] - [JHTR01000001.1_prot_KDB18639.1_30]	388.921	21	1	12	12	22	1.09273	1.08288	1.05712	0.941629	0.928297	0.942956	619	68.5758	4.83057	0.870126	0.000270711
UV8b_4316	[locus_tag=UV8b_4316] [protein=oligosaccharyltransferase alpha subunit] [protein_id=KDB14793.1] [location=join(213973..214304,214424..215269,215348..215624)] [gbkey=CDS] - [JHTR01000020.1_prot_KDB14793.1_4316]	386.811	28.51	1	12	12	23	1.01518	1.00149	1.01937	0.960418	0.961302	1.00342	484	53.6538	8.63135	0.963472	0.0715798
UV8b_4540	[locus_tag=UV8b_4540] [protein=hypothetical protein] [protein_id=KDB14684.1] [location=join(448430..449971,450063..450306,450361..451079)] [gbkey=CDS] - [JHTR01000021.1_prot_KDB14684.1_4540]	386.504	13.91	1	8	8	18	0.937544	0.957419	0.969591	1.03403	1.07751	1.05763	834	93.7988	6.84424	1.10634	0.002915
UV8b_2138	[locus_tag=UV8b_2138] [protein=cell lysis protein-like protein] [protein_id=KDB17046.1] [location=complement(join(446892..447347,447418..447719,447800..447961,448073..448105,448257..448308))] [gbkey=CDS] - [JHTR01000008.1_prot_KDB17046.1_2138]	386.499	28.14	1	8	8	28	0.977723	1.02798	0.997627	0.976159	0.993269	0.995669	334	36.0588	8.74854	0.98727	0.466455
UV8b_7100	[locus_tag=UV8b_7100] [protein=putative carboxyphosphonoenolpyruvate phosphonomutase] [protein_id=KDB12107.1] [location=complement(join(196285..196907,197045..197192,197304..197561))] [gbkey=CDS] - [JHTR01000051.1_prot_KDB12107.1_7100]	386.492	12.57	1	4	4	12	0.856183	0.816986	0.784618	1.204	1.24219	1.16333	342	36.6537	6.06201	1.4686	0.00023717
UV8b_449	[locus_tag=UV8b_449] [protein=26S protease regulatory subunit 8] [protein_id=KDB19058.1] [location=complement(join(1942443..1943377,1943500..1943734))] [gbkey=CDS] - [JHTR01000001.1_prot_KDB19058.1_449]	386.388	31.88	2	10	12	36	0.970699	1.00419	1.05497	0.97263	1.03528	0.997061	389	43.382	8.41162	0.991787	0.799359
UV8b_3371	[locus_tag=UV8b_3371] [protein=glutathione S-transferase II] [protein_id=KDB15731.1] [location=complement(join(295208..295491,295583..295750,295824..295881,296014..296431,296463..296940,297144..297711,297807..297914))] [gbkey=CDS] - [JHTR01000014.1_prot_KDB15731.1_3371]	386.23	10.68	1	6	6	17	0.935023	0.926122	0.846174	1.12577	1.15382	1.06467	693	77.861	7.6792	1.23527	0.00533162
UV8b_3117	[locus_tag=UV8b_3117] [protein=G-protein beta subunit] [protein_id=KDB16187.1] [location=complement(join(610043..610468,610791..611108,611215..611334))] [gbkey=CDS] - [JHTR01000012.1_prot_KDB16187.1_3117]	386.101	35.19	1	8	8	34	1.03929	1.04565	1.02401	0.968395	0.93694	0.966543	287	31.879	7.72314	0.923746	0.0027927
UV8b_2686	[locus_tag=UV8b_2686] [protein=KH domain RNA-binding protein] [protein_id=KDB16230.1] [location=join(16625..17024,17116..17684,17755..17892)] [gbkey=CDS] - [JHTR01000011.1_prot_KDB16230.1_2686]	385.041	24.73	1	7	7	18	0.935058	0.985558	1.00045	0.987628	1.08876	1.01667	368	39.2728	6.45557	1.05888	0.186405
UV8b_5911	[locus_tag=UV8b_5911] [protein=lysophospholipase] [protein_id=KDB13151.1] [location=join(40358..40573,40678..40713,40786..41168,41261..41345)] [gbkey=CDS] - [JHTR01000034.1_prot_KDB13151.1_5911]	384.681	33.05	1	6	6	21	1.00571	0.994541	1.08015	0.948827	0.993957	0.973215	239	26.4777	7.1958	0.94663	0.140427
UV8b_2124	[locus_tag=UV8b_2124] [protein=nuclear movement protein nudC] [protein_id=KDB17032.1] [location=complement(join(404017..404367,404529..404873))] [gbkey=CDS] - [JHTR01000008.1_prot_KDB17032.1_2124]	384.183	41.13	1	11	11	31	1.01189	1.01158	0.981766	1.03139	0.99118	1.01511	231	26.0081	6.44287	1.01079	0.520482
UV8b_6287	[locus_tag=UV8b_6287] [protein=putative myosin MYO2] [protein_id=KDB12926.1] [location=join(263319..263453,263525..263657,263724..263834,264000..264632,264732..267817,267880..267953,268015..268229,268294..268448)] [gbkey=CDS] - [JHTR01000038.1_prot_KDB12926.1_6287]	382.954	12.23	1	16	16	29	1.02037	1.0394	1.03454	0.963283	0.964974	0.976661	1513	172.203	7.1958	0.938792	0.000879677
UV8b_4070	[locus_tag=UV8b_4070] [protein=cellular nucleic acid-binding protein] [protein_id=KDB14924.1] [location=join(43335..43461,44127..44204,44309..44328,44387..44421,44485..44498,44567..44581,44635..44768,44846..44981,45051..45196)] [gbkey=CDS] - [JHTR01000019.1_prot_KDB14924.1_4070]	382.765	28.21	1	5	5	12	1.12517	1.11437	1.02107	0.916499	0.846095	0.885504	234	24.3927	8.04541	0.812149	0.00625876
UV8b_7672	[locus_tag=UV8b_7672] [protein=nuclear condensin complex subunit Smc4] [protein_id=KDB11527.1] [location=complement(join(157952..158194,158441..162706))] [gbkey=CDS] - [JHTR01000067.1_prot_KDB11527.1_7672]	382.181	11.12	1	15	15	27	1.01563	1.01006	1.02112	0.976956	0.994185	0.98566	1502	167.602	6.1001	0.970458	0.00709792
UV8b_5551	[locus_tag=UV8b_5551] [protein=thioredoxin M-type] [protein_id=KDB13719.1] [location=join(458390..458731,458836..458859)] [gbkey=CDS] - [JHTR01000030.1_prot_KDB13719.1_5551]	382.049	19.83	1	2	2	11	0.980106	1.02399	1.04052	0.979485	1.01416	1.02273	121	12.9364	4.95752	0.990727	0.695405
UV8b_7606	[locus_tag=UV8b_7606] [protein=ubiquitin carboxyl-terminal hydrolase] [protein_id=KDB11564.1] [location=complement(join(121742..122346,122456..123206,123272..125970,126124..126830,128786..128976,129280..129659,129798..131433,131499..132353,132517..132762))] [gbkey=CDS] - [JHTR01000066.1_prot_KDB11564.1_7606]	381.144	9.85	1	24	24	44	1.00455	0.99823	0.973949	1.02707	0.973039	1.00265	2689	299.942	5.57959	1.00875	0.658246
UV8b_2985	[locus_tag=UV8b_2985] [protein=arginyl-tRNA synthetase] [protein_id=KDB16055.1] [location=join(230521..230811,230879..231005,231055..231116,231176..231302,231382..231620,231692..231761,231880..231921,231979..232132,232203..232260,232339..232517,232594..232743,232805..233222)] [gbkey=CDS] - [JHTR01000012.1_prot_KDB16055.1_2985]	379.099	21.94	1	10	10	20	0.975577	1.01684	1.00164	1.01005	0.986229	0.999659	638	71.8175	6.7124	1.00063	0.966213
UV8b_1583	[locus_tag=UV8b_1583] [protein=ANTH domain protein] [protein_id=KDB17699.1] [location=join(688952..688983,689092..689232,689298..689779,689841..692254,693062..693148)] [gbkey=CDS] - [JHTR01000005.1_prot_KDB17699.1_1583]	377.64	19.7	1	19	19	36	0.978259	1.009	0.993524	1.00411	1.01245	1.00417	1051	119.101	5.89697	1.0134	0.225394
UV8b_7879	[locus_tag=UV8b_7879] [protein=oxysterol binding protein] [protein_id=KDB11269.1] [location=join(62138..62289,62420..64982,65084..66298)] [gbkey=CDS] - [JHTR01000075.1_prot_KDB11269.1_7879]	375.966	15.58	2	12	16	23	1.00151	1.04784	1.03972	0.958367	1.00038	0.973872	1309	142.989	6.12549	0.949353	0.0503264
UV8b_5387	[locus_tag=UV8b_5387] [protein=ribosomal protein S28] [protein_id=KDB13780.1] [location=complement(join(252122..252227,252253..252427,252485..252743))] [gbkey=CDS] - [JHTR01000029.1_prot_KDB13780.1_5387]	374.955	37.43	2	6	6	21	0.938328	1.0155	1.14706	0.87992	1.11121	0.95324	179	19.6689	10.6382	0.949525	0.599002
UV8b_5024	[locus_tag=UV8b_5024] [protein=transcription factor] [protein_id=KDB14035.1] [location=join(118384..119451,119524..119856,119924..120064,120133..121005)] [gbkey=CDS] - [JHTR01000026.1_prot_KDB14035.1_5024]	374.129	21.02	2	14	14	22	0.933711	0.936753	0.958573	1.02605	1.11502	1.06197	804	90.0155	6.7417	1.1322	0.00990406
UV8b_3120	[locus_tag=UV8b_3120] [protein=serine hydroxymethyltransferase precursor] [protein_id=KDB16190.1] [location=complement(join(619816..620960,621039..621176,621269..621362,621517..621573,621633..621656))] [gbkey=CDS] - [JHTR01000012.1_prot_KDB16190.1_3120]	373.848	25.57	1	9	9	20	0.999573	0.977442	1.04026	0.947662	1.04845	1.03737	485	53.0553	8.00146	1.00537	0.890499
UV8b_7643	[locus_tag=UV8b_7643] [protein=proteasome regulatory particle subunit Rpt2] [protein_id=KDB11498.1] [location=join(68442..68462,68687..68743,68803..69609,69723..70229)] [gbkey=CDS] - [JHTR01000067.1_prot_KDB11498.1_7643]	372.416	34.77	1	10	10	25	0.992906	1.00795	1.01369	0.941953	0.97513	0.985288	463	51.1685	6.12549	0.962789	0.0611611
UV8b_5350	[locus_tag=UV8b_5350] [protein=rnapii degradation factor def1] [protein_id=KDB13743.1] [location=complement(join(134659..136013,136079..137218,137544..137844))] [gbkey=CDS] - [JHTR01000029.1_prot_KDB13743.1_5350]	372.394	23.63	1	14	14	23	0.987952	0.983359	1.00218	1.01836	1.02219	1.01298	931	96.6137	6.69775	1.02692	0.0130602
UV8b_4533	[locus_tag=UV8b_4533] [protein=T-complex protein 1 subunit zeta] [protein_id=KDB14677.1] [location=complement(join(341416..341660,341720..342719,342791..343027,343098..343119,343185..343279,343353..343394))] [gbkey=CDS] - [JHTR01000021.1_prot_KDB14677.1_4533]	371.333	27.84	1	14	14	26	1.01103	1.04997	1.06302	0.935164	0.980548	0.964652	546	59.3931	6.85889	0.922004	0.016674
UV8b_6370	[locus_tag=UV8b_6370] [protein=Sec23/Sec24 family protein] [protein_id=KDB12714.1] [location=join(39827..40000,40304..40657,40687..41850,41998..42436,42635..43854,43993..44072,45453..45501)] [gbkey=CDS] - [JHTR01000040.1_prot_KDB12714.1_6370]	369.046	12.42	1	10	10	18	0.93942	0.985669	0.954717	1.01344	1.11603	1.06029	1159	125.071	8.45557	1.10763	0.0339501
UV8b_5710	[locus_tag=UV8b_5710] [protein=putative transcription regulator BDF1] [protein_id=KDB13331.1] [location=join(44684..44781,44882..47357,47507..47860)] [gbkey=CDS] - [JHTR01000032.1_prot_KDB13331.1_5710]	368.511	23.9	1	20	20	37	0.944651	0.975809	0.973619	1.02598	1.06575	1.07256	975	102.884	5.40186	1.09337	0.00697957
UV8b_4570	[locus_tag=UV8b_4570] [protein=hypothetical protein] [protein_id=KDB14714.1] [location=join(550268..550543,550601..550895,550990..551441,551612..551701)] [gbkey=CDS] - [JHTR01000021.1_prot_KDB14714.1_4570]	367.511	7.57	1	3	3	8	1.05588	0.966588	0.819659	1.15511	0.907569	1.08081	370	40.9158	6.81494	1.10603	0.374525
UV8b_5854	[locus_tag=UV8b_5854] [protein=alpha-1,2 mannosyltransferase KTR1] [protein_id=KDB13264.1] [location=join(140753..140803,140879..142007,142133..142200)] [gbkey=CDS] - [JHTR01000033.1_prot_KDB13264.1_5854]	367.157	40.72	1	16	16	39	0.972001	0.999812	1.01764	0.975692	1.02235	1.00733	415	48.2394	6.34131	1.00533	0.795074
UV8b_2086	[locus_tag=UV8b_2086] [protein=polyketide synthetase PksP] [protein_id=KDB16994.1] [location=complement(join(309454..310295,310453..315632,315722..316408,316848..317494,317555..317635))] [gbkey=CDS] - [JHTR01000008.1_prot_KDB16994.1_2086]	366.473	10.73	1	22	22	37	0.786632	0.792863	0.804479	1.26411	1.25312	1.29608	2478	267.17	6.80029	1.59956	4.33159e-06
UV8b_5700	[locus_tag=UV8b_5700] [protein=putative methylglutaconyl-CoA hydratase precursor] [protein_id=KDB13321.1] [location=join(839..1380,1549..2113)] [gbkey=CDS] - [JHTR01000032.1_prot_KDB13321.1_5700]	366.419	31.52	1	9	9	22	0.983695	1.00909	1.02642	1.01422	0.978766	0.999636	368	39.4011	9.86182	0.991195	0.611733
UV8b_3236	[locus_tag=UV8b_3236] [protein=putative pig glycolipid transfer protein] [protein_id=KDB15924.1] [location=complement(join(357031..357325,357426..357544,357707..357765,357842..357989))] [gbkey=CDS] - [JHTR01000013.1_prot_KDB15924.1_3236]	365.361	22.33	1	4	4	12	1.03602	1.00703	0.952267	0.996773	0.981318	0.98891	206	22.6107	6.91748	0.990548	0.724545
UV8b_2782	[locus_tag=UV8b_2782] [protein=GTP-binding protein SAR1] [protein_id=KDB16326.1] [location=complement(join(284567..284907,285016..285235,285436..285539,285615..285633))] [gbkey=CDS] - [JHTR01000011.1_prot_KDB16326.1_2782]	365.357	28.19	1	5	5	35	0.972887	0.99673	1.03228	0.959751	1.02364	1.00591	227	25.4622	6.53662	0.995803	0.878099
UV8b_3718	[locus_tag=UV8b_3718] [protein=60S ribosomal protein L22] [protein_id=KDB15292.1] [location=complement(join(56516..56642,56740..56936,57010..57045,57309..57323))] [gbkey=CDS] - [JHTR01000016.1_prot_KDB15292.1_3718]	364.566	25	1	3	3	16	1.06685	1.02207	1.00214	1.03977	0.909318	0.940844	124	14.2154	9.08545	0.93493	0.199833
UV8b_3436	[locus_tag=UV8b_3436] [protein=putative ribosome associated DnaJ chaperone Zuotin] [protein_id=KDB15796.1] [location=complement(join(484726..485196,487413..488438,488507..488803))] [gbkey=CDS] - [JHTR01000014.1_prot_KDB15796.1_3436]	364.211	27.3	1	16	16	29	1.03235	1.07473	1.04468	0.921719	0.951165	0.955546	597	67.4137	8.82178	0.897413	0.00281679
UV8b_3735	[locus_tag=UV8b_3735] [protein=geranylgeranyl diphosphate synthase] [protein_id=KDB15309.1] [location=complement(115808..117175)] [gbkey=CDS] - [JHTR01000016.1_prot_KDB15309.1_3735]	364.062	15.16	1	6	6	19	0.971097	0.947256	0.912619	1.08745	1.02976	1.03424	455	50.4674	6.04932	1.11321	0.0131506
UV8b_3005	[locus_tag=UV8b_3005] [protein=putative vacuolar ATPase subunit c] [protein_id=KDB16075.1] [location=complement(join(276452..276658,276753..277245,277326..277417,277492..277586,277672..277966))] [gbkey=CDS] - [JHTR01000012.1_prot_KDB16075.1_3005]	362.603	29.01	1	11	11	25	0.986923	0.998111	1.02385	0.957223	1.02329	0.997641	393	44.2375	6.58057	0.989787	0.667388
UV8b_969	[locus_tag=UV8b_969] [protein=40S ribosomal protein S19] [protein_id=KDB18121.1] [location=join(415270..415302,415758..415821,415899..416257)] [gbkey=CDS] - [JHTR01000003.1_prot_KDB18121.1_969]	362.323	57.62	1	12	12	41	1.03674	1.07299	1.10262	0.912117	0.941117	0.918913	151	16.7867	9.23193	0.862965	0.00219356
UV8b_4924	[locus_tag=UV8b_4924] [protein=NADH-ubiquinone oxidoreductase 51 kDa subunit] [protein_id=KDB14329.1] [location=complement(join(465687..465856,466027..467014,467094..467399))] [gbkey=CDS] - [JHTR01000024.1_prot_KDB14329.1_4924]	361.77	35.32	1	16	16	30	0.967366	0.991017	1.01718	1.03174	1.04341	0.98918	487	53.1847	8.22119	1.02983	0.247602
UV8b_3223	[locus_tag=UV8b_3223] [protein=class V chitin synthase] [protein_id=KDB15911.1] [location=join(313270..313580,313661..318909,318999..319030)] [gbkey=CDS] - [JHTR01000013.1_prot_KDB15911.1_3223]	360.868	9.98	2	14	14	21	1.0306	1.0085	0.975332	1.00487	0.968873	1.00504	1863	206.816	7.38623	0.988176	0.585618
UV8b_637	[locus_tag=UV8b_637] [protein=perilipin-like protein] [protein_id=KDB18395.1] [location=join(432018..432077,432234..432725)] [gbkey=CDS] - [JHTR01000002.1_prot_KDB18395.1_637]	359.758	41.53	1	9	9	54	0.858112	0.869289	0.88623	1.09844	1.19125	1.12645	183	20.1896	8.98291	1.30705	0.000734841
UV8b_1721	[locus_tag=UV8b_1721] [protein=nitrate reductase] [protein_id=KDB17464.1] [location=join(679255..679420,679574..679655,679805..680348,680475..680624)] [gbkey=CDS] - [JHTR01000006.1_prot_KDB17464.1_1721]	359.174	48.88	1	11	11	27	0.99746	1.03989	1.09795	0.927042	0.963248	0.939603	313	34.6254	9.17334	0.902591	0.0303851
UV8b_5312	[locus_tag=UV8b_5312] [protein=glutaredoxin] [protein_id=KDB13978.1] [location=complement(join(451742..451911,451964..452192))] [gbkey=CDS] - [JHTR01000028.1_prot_KDB13978.1_5312]	357.086	42.42	1	4	4	17	1.07326	1.03175	1.00596	0.905293	0.936949	0.990869	132	14.1422	6.75635	0.910685	0.0433819
UV8b_142	[locus_tag=UV8b_142] [protein=p47 protein] [protein_id=KDB18751.1] [location=join(448705..448791,448885..449324,449496..449935,450121..450446)] [gbkey=CDS] - [JHTR01000001.1_prot_KDB18751.1_142]	357.027	27.44	1	9	9	20	0.984719	1.04236	1.0161	0.978538	0.996215	1.00358	430	45.4235	5.71924	0.978692	0.30168
UV8b_1487	[locus_tag=UV8b_1487] [protein=carnitine acetyl transferase] [protein_id=KDB17603.1] [location=complement(join(392964..393112,393192..395159,395253..395670))] [gbkey=CDS] - [JHTR01000005.1_prot_KDB17603.1_1487]	356.623	10.43	1	7	7	17	1.01711	1.02582	1.07682	0.861933	0.993858	0.942785	844	93.2916	6.59521	0.89705	0.0661785
UV8b_6310	[locus_tag=UV8b_6310] [protein=Cell division control protein] [protein_id=KDB12816.1] [location=join(70089..70125,70367..71042,71158..71425)] [gbkey=CDS] - [JHTR01000039.1_prot_KDB12816.1_6310]	353.98	19.94	1	6	6	19	0.98432	0.991211	0.969861	1.05341	1.05868	0.997503	326	37.203	6.45557	1.05575	0.0562596
UV8b_8212	[locus_tag=UV8b_8212] [protein=Peptide-N4-(N-acetyl-beta-glucosaminyl)asparagine amidase A] [protein_id=KDB10918.1] [location=complement(join(8048..9816,9904..10216))] [gbkey=CDS] - [JHTR01000092.1_prot_KDB10918.1_8212]	352.564	3.32	1	2	2	11	1.02007	0.969506	1.05287	0.993768	0.973204	1.0216	693	75.2786	6.91748	0.982292	0.556314
UV8b_139	[locus_tag=UV8b_139] [protein=urg3] [protein_id=KDB18748.1] [location=join(442481..442846,443084..443359,443431..443647,443762..444354,444420..444503)] [gbkey=CDS] - [JHTR01000001.1_prot_KDB18748.1_139]	351.605	28.18	1	10	10	29	0.996542	0.992457	0.992503	1.02396	1.00089	1.02483	511	56.0436	6.63916	1.02287	0.0460401
UV8b_781	[locus_tag=UV8b_781] [protein=vacuolar ATP synthase 98 kDa subunit] [protein_id=KDB18539.1] [location=join(855412..855540,855638..855716,855773..857800,857882..858061,858160..858332)] [gbkey=CDS] - [JHTR01000002.1_prot_KDB18539.1_781]	351.253	10.9	1	9	9	20	1.00676	0.979182	0.937826	1.09388	0.974019	0.996574	862	98.0977	5.71924	1.04812	0.325435
UV8b_3217	[locus_tag=UV8b_3217] [protein=polyubiquitin] [protein_id=KDB15905.1] [location=join(286455..286574,286644..287165,287241..287454,287514..287885,287941..288236,288842..288902,288976..288982,289076..289256,289427..289537,289631..289713,290490..290772,290805..291140)] [gbkey=CDS] - [JHTR01000013.1_prot_KDB15905.1_3217]	349.889	6.85	2	3	8	41	0.928436	1.13656	1.09871	1.06229	0.953836	0.895755	861	96.052	9.24658	0.920402	0.355874
UV8b_6327	[locus_tag=UV8b_6327] [protein=PH domain protein] [protein_id=KDB12833.1] [location=complement(join(212423..213700,213770..213895,213963..214061))] [gbkey=CDS] - [JHTR01000039.1_prot_KDB12833.1_6327]	349.466	28.2	1	10	10	27	1.0449	1.03162	1.11267	0.874512	0.995348	0.946266	500	53.6927	6.37939	0.883023	0.0448931
UV8b_2567	[locus_tag=UV8b_2567] [protein=UDP-glucose:glycoprotein glucosyltransferase precursor] [protein_id=KDB16532.1] [location=join(194231..194361,194415..194759,194813..195752)] [gbkey=CDS] - [JHTR01000010.1_prot_KDB16532.1_2567]	348.029	16.56	1	5	5	14	0.950814	0.981016	1.05996	0.977963	1.06674	0.997989	471	52.5821	6.62451	1.01702	0.708217
UV8b_1410	[locus_tag=UV8b_1410] [protein=tubulin beta chain] [protein_id=KDB17526.1] [location=join(134755..135010,135131..135429,135567..136154)] [gbkey=CDS] - [JHTR01000005.1_prot_KDB17526.1_1410]	347.378	39.21	1	6	10	20	0.972082	0.947402	1.1466	0.869182	1.092	0.873316	380	42.2233	4.95752	0.924466	0.469294
UV8b_7972	[locus_tag=UV8b_7972] [protein=NTF2 and RRM domain-containing protein] [protein_id=KDB11161.1] [location=join(24959..25132,25192..25266,25348..26388,26455..26751)] [gbkey=CDS] - [JHTR01000078.1_prot_KDB11161.1_7972]	346.12	25.57	1	8	8	26	0.978646	1.02007	1.08673	0.952028	1.00271	0.987068	528	54.8692	5.09717	0.953448	0.241663
UV8b_7300	[locus_tag=UV8b_7300] [protein=glucose-6-phosphate isomerase] [protein_id=KDB11877.1] [location=complement(join(164711..165231,165325..165431,165511..166044,166131..166630))] [gbkey=CDS] - [JHTR01000057.1_prot_KDB11877.1_7300]	346.095	24.59	2	11	11	30	0.999768	1.01264	1.0526	0.964152	1.01594	0.953822	553	60.8887	6.66846	0.957231	0.154729
UV8b_645	[locus_tag=UV8b_645] [protein=aminotransferase] [protein_id=KDB18403.1] [location=join(456367..456460,456907..457382,457510..457873,457960..457972,458090..458213,458290..458369,458445..458679)] [gbkey=CDS] - [JHTR01000002.1_prot_KDB18403.1_645]	346.029	27.98	1	11	11	27	1.06142	1.03911	1.04519	0.934031	0.931229	0.941338	461	51.617	6.43018	0.892195	0.000101973
UV8b_6454	[locus_tag=UV8b_6454] [protein=transcription regulatory protein SWI3] [protein_id=KDB12798.1] [location=complement(join(318474..319922,319990..320535))] [gbkey=CDS] - [JHTR01000040.1_prot_KDB12798.1_6454]	345.997	24.1	1	13	13	21	0.960565	0.999334	1.00575	0.992143	1.06954	1.01663	664	72.542	5.56689	1.03799	0.234423
UV8b_7599	[locus_tag=UV8b_7599] [protein=60S ribosomal protein L12] [protein_id=KDB11557.1] [location=join(80106..80197,80248..80368,80425..80749,80816..80829)] [gbkey=CDS] - [JHTR01000066.1_prot_KDB11557.1_7599]	345.811	25.14	2	4	4	17	0.964872	1.04155	1.11618	0.890055	1.01969	0.977062	183	19.7588	9.5542	0.924486	0.246773
UV8b_3642	[locus_tag=UV8b_3642] [protein=N-acetylglucosaminidase] [protein_id=KDB15611.1] [location=436657..438510] [gbkey=CDS] - [JHTR01000015.1_prot_KDB15611.1_3642]	345.624	23.18	1	11	11	27	0.993615	0.99041	0.960241	1.03376	1.02708	1.01552	617	68.286	6.84424	1.04487	0.0207839
UV8b_2554	[locus_tag=UV8b_2554] [protein=integral membrane protein] [protein_id=KDB16519.1] [location=complement(join(160706..161053,161186..161461,161554..161736))] [gbkey=CDS] - [JHTR01000010.1_prot_KDB16519.1_2554]	344.832	21.64	1	6	6	13	0.981762	0.983987	0.930358	1.04665	1.00007	1.02801	268	29.609	10.4478	1.06168	0.05467
UV8b_5313	[locus_tag=UV8b_5313] [protein=60S ribosomal protein L16] [protein_id=KDB13979.1] [location=join(452422..452651,453442..454429,455257..455442,455826..455961,456063..456116,456183..456441,456517..456655)] [gbkey=CDS] - [JHTR01000028.1_prot_KDB13979.1_5313]	344.503	18.1	1	16	16	41	1.02005	1.05666	1.10688	0.940787	0.967554	0.938725	663	72.2603	9.33447	0.894292	0.0138994
UV8b_52	[locus_tag=UV8b_52] [protein=signal recognition particle 54 kDa protein] [protein_id=KDB18661.1] [location=185669..187606] [gbkey=CDS] - [JHTR01000001.1_prot_KDB18661.1_52]	343.747	17.36	1	10	10	27	1.02428	1.01117	1.03388	0.961015	1.00628	0.929114	645	69.2612	8.99756	0.943662	0.0689291
UV8b_4559	[locus_tag=UV8b_4559] [protein=serine-type carboxypeptidase] [protein_id=KDB14703.1] [location=complement(join(503255..504571,504703..504881,504992..505199))] [gbkey=CDS] - [JHTR01000021.1_prot_KDB14703.1_4559]	343.179	10.41	1	4	4	14	0.852689	0.951339	1.02334	1.00076	1.17129	1.09636	567	63.3915	6.55127	1.15599	0.103176
UV8b_3621	[locus_tag=UV8b_3621] [protein=cytochrome P450 oxidoreductase] [protein_id=KDB15590.1] [location=join(379971..381752,381833..382111,382190..382207)] [gbkey=CDS] - [JHTR01000015.1_prot_KDB15590.1_3621]	342.576	26.88	1	17	17	40	1.01756	1.00907	0.985717	1.00983	0.96387	0.970593	692	76.8373	5.35107	0.977406	0.257736
UV8b_6333	[locus_tag=UV8b_6333] [protein=proteasome regulatory particle, non-ATPase-like protein] [protein_id=KDB12839.1] [location=join(230459..230917,231002..231816,231940..232138)] [gbkey=CDS] - [JHTR01000039.1_prot_KDB12839.1_6333]	340.754	23.88	1	11	11	19	1.03014	1.03036	1.03719	0.988448	0.968384	0.973961	490	53.6266	6.18896	0.94612	0.000970527
UV8b_3203	[locus_tag=UV8b_3203] [protein=BAR domain protein] [protein_id=KDB15891.1] [location=complement(join(229115..229150,229220..229351,229411..230014,230096..230178,230242..230323,230402..230436))] [gbkey=CDS] - [JHTR01000013.1_prot_KDB15891.1_3203]	339.595	39.32	1	10	10	18	0.941698	1.01007	0.941918	1.01831	1.0158	1.02457	323	35.5369	5.37646	1.05702	0.0742511
UV8b_5344	[locus_tag=UV8b_5344] [protein=26S protease regulatory subunit 7] [protein_id=KDB13737.1] [location=complement(join(116370..117482,117538..117652,117708..117829))] [gbkey=CDS] - [JHTR01000029.1_prot_KDB13737.1_5344]	339.42	24.5	1	8	8	17	0.99017	0.999392	0.952717	1.00807	1.04305	1.00817	449	50.1429	7.1665	1.03977	0.101605
UV8b_408	[locus_tag=UV8b_408] [protein=eukaryotic translation initiation factor 6] [protein_id=KDB19017.1] [location=join(1691350..1691384,1691661..1692366)] [gbkey=CDS] - [JHTR01000001.1_prot_KDB19017.1_408]	337.831	29.27	1	5	5	10	0.960294	0.979678	0.995129	0.964584	1.08395	1.02842	246	26.5136	4.70361	1.04833	0.258498
UV8b_5881	[locus_tag=UV8b_5881] [protein=acetyl-CoA acetyltransferase] [protein_id=KDB13291.1] [location=join(204542..204691,204804..205946)] [gbkey=CDS] - [JHTR01000033.1_prot_KDB13291.1_5881]	337.522	18.6	1	7	7	21	1.01309	1.04407	1.00552	0.957784	1.01925	0.97366	430	44.8714	8.86572	0.963433	0.163033
UV8b_5214	[locus_tag=UV8b_5214] [protein=protein mlo3-like protein] [protein_id=KDB13880.1] [location=complement(join(171747..172041,172105..172178,172244..172408,173305..173334,173398..173619))] [gbkey=CDS] - [JHTR01000028.1_prot_KDB13880.1_5214]	336.473	31.42	1	7	7	23	0.987974	0.994498	0.961446	1.01456	1.0706	1.02252	261	27.1262	10.3013	1.05563	0.054067
UV8b_5173	[locus_tag=UV8b_5173] [protein=carboxyl-terminal proteinase] [protein_id=KDB13839.1] [location=join(50049..50303,50378..51421)] [gbkey=CDS] - [JHTR01000028.1_prot_KDB13839.1_5173]	336.41	15.28	1	5	5	17	0.867974	0.810844	0.813039	1.06076	1.21506	1.1965	432	45.9701	7.59131	1.39347	0.00329708
UV8b_6313	[locus_tag=UV8b_6313] [protein=sulfite reductase [NADPH] flavoprotein component] [protein_id=KDB12819.1] [location=86924..90157] [gbkey=CDS] - [JHTR01000039.1_prot_KDB12819.1_6313]	335.968	17.36	1	15	15	31	1.02248	1.0402	1.04891	0.95011	0.980211	0.956778	1077	117.864	5.36377	0.927854	0.00336034
UV8b_7588	[locus_tag=UV8b_7588] [protein=putative proteasome regulatory particle subunit (RpnI)] [protein_id=KDB11546.1] [location=complement(join(58147..58788,58869..59104,59158..59425))] [gbkey=CDS] - [JHTR01000066.1_prot_KDB11546.1_7588]	333.909	12.6	1	5	5	17	1.00542	1.00482	1.03881	0.964123	0.977556	0.988888	381	43.4934	6.11279	0.961142	0.0413353
UV8b_566	[locus_tag=UV8b_566] [protein=guanylate kinase] [protein_id=KDB18324.1] [location=join(198879..198948,199014..199330,199784..200044)] [gbkey=CDS] - [JHTR01000002.1_prot_KDB18324.1_566]	333.622	34.88	1	7	7	17	0.997292	0.983738	0.975394	1.01675	1.01147	1.01035	215	24.0955	8.14795	1.02778	0.0148571
UV8b_4048	[locus_tag=UV8b_4048] [protein=branched-chain amino acid aminotransferase] [protein_id=KDB15208.1] [location=complement(join(498663..498845,498939..500003))] [gbkey=CDS] - [JHTR01000018.1_prot_KDB15208.1_4048]	333.469	26.02	1	9	9	20	0.968892	0.984969	0.965933	1.04956	1.04017	1.04353	415	45.1731	7.56201	1.07311	0.000400393
UV8b_603	[locus_tag=UV8b_603] [protein=60S ribosomal protein L25] [protein_id=KDB18361.1] [location=complement(join(291688..291775,291837..291949,292027..292206,292273..292319,292393..292414))] [gbkey=CDS] - [JHTR01000002.1_prot_KDB18361.1_603]	332.037	31.54	1	5	5	21	1.0089	1.01824	1.01546	0.98103	0.990206	0.976426	149	16.6811	10.1108	0.968796	0.00297113
UV8b_7318	[locus_tag=UV8b_7318] [protein=isopentenyl-diphosphate delta-isomerase] [protein_id=KDB11805.1] [location=complement(join(55436..55668,55798..56136,56220..56421))] [gbkey=CDS] - [JHTR01000058.1_prot_KDB11805.1_7318]	331.372	28.4	1	7	7	20	1.00913	1.02459	1.02311	0.976855	1.01627	0.985475	257	29.5419	5.52881	0.974407	0.114038
UV8b_3846	[locus_tag=UV8b_3846] [protein=ketoisovalerate reductase] [protein_id=KDB15420.1] [location=463505..464797] [gbkey=CDS] - [JHTR01000016.1_prot_KDB15420.1_3846]	331.31	14.65	1	4	4	13	0.960173	0.974001	1.02232	0.996024	1.04176	1.03665	430	47.1799	8.66064	1.03989	0.173241
UV8b_6793	[locus_tag=UV8b_6793] [protein=ATP synthase subunit E] [protein_id=KDB12306.1] [location=complement(join(24104..24177,24275..24464,24520..24621))] [gbkey=CDS] - [JHTR01000046.1_prot_KDB12306.1_6793]	330.704	35.54	1	6	6	16	0.971832	0.985528	0.918542	1.01401	1.03538	1.06229	121	13.2639	9.27588	1.08199	0.033679
UV8b_582	[locus_tag=UV8b_582] [protein=40S ribosomal protein S5] [protein_id=KDB18340.1] [location=join(233308..233447,233609..233792,233957..234274)] [gbkey=CDS] - [JHTR01000002.1_prot_KDB18340.1_582]	330.61	48.36	1	13	13	33	1.03035	1.061	1.08708	0.946958	0.953414	0.931699	213	23.6334	9.18799	0.891028	0.00280075
UV8b_1698	[locus_tag=UV8b_1698] [protein=Eukaryotic release factor 1] [protein_id=KDB17441.1] [location=complement(join(542968..544104,544167..544216,544280..544364,544600..544635))] [gbkey=CDS] - [JHTR01000006.1_prot_KDB17441.1_1698]	329.946	16.55	3	6	6	18	1.04172	0.993401	0.944999	1.03421	0.955861	1.03754	435	48.778	5.52881	1.01594	0.702918
UV8b_3356	[locus_tag=UV8b_3356] [protein=60S ribosomal protein L31] [protein_id=KDB15716.1] [location=join(233552..233644,233752..233826,234003..234206)] [gbkey=CDS] - [JHTR01000014.1_prot_KDB15716.1_3356]	329.125	49.59	1	12	12	46	1.10628	1.06268	1.03148	0.956252	0.88211	0.929352	123	13.9476	10.2134	0.86479	0.0092776
UV8b_4000	[locus_tag=UV8b_4000] [protein=putative zinc metallo-protease] [protein_id=KDB15160.1] [location=join(349625..349639,349818..350747,350892..351323)] [gbkey=CDS] - [JHTR01000018.1_prot_KDB15160.1_4000]	328.838	16.81	1	9	9	29	0.983285	1.00754	0.977514	1.01025	1.022	0.999278	458	52.481	9.37842	1.02129	0.135756
UV8b_5944	[locus_tag=UV8b_5944] [protein=RNP domain protein] [protein_id=KDB13184.1] [location=join(173528..173727,174016..174313,174388..174657,174719..175030)] [gbkey=CDS] - [JHTR01000034.1_prot_KDB13184.1_5944]	328.786	39.28	2	11	13	44	1.10083	1.05988	0.928773	1.02586	0.869379	0.949103	359	38.4047	7.03467	0.920651	0.300648
UV8b_3616	[locus_tag=UV8b_3616] [protein=ATP-dependent protease La] [protein_id=KDB15585.1] [location=complement(join(361354..361515,361611..364799))] [gbkey=CDS] - [JHTR01000015.1_prot_KDB15585.1_3616]	328.438	19.62	1	15	15	29	0.975448	1.0084	1.03046	0.984066	1.03165	0.981438	1116	122.289	6.06201	0.994311	0.814726
UV8b_6940	[locus_tag=UV8b_6940] [protein=alcohol dehydrogenase] [protein_id=KDB12236.1] [location=join(195290..197111,197208..197335)] [gbkey=CDS] - [JHTR01000048.1_prot_KDB12236.1_6940]	328.298	20.65	1	10	10	15	0.965733	0.968172	0.981245	1.01436	1.04487	1.03152	649	69.2377	5.8208	1.06024	0.00434047
UV8b_6662	[locus_tag=UV8b_6662] [protein=zinc-binding dehydrogenase] [protein_id=KDB12438.1] [location=complement(53454..54476)] [gbkey=CDS] - [JHTR01000044.1_prot_KDB12438.1_6662]	328.11	31.47	1	9	9	18	0.961896	0.98214	0.952027	1.0206	1.0741	1.01367	340	36.1396	6.97607	1.07331	0.0282536
UV8b_605	[locus_tag=UV8b_605] [protein=4-hydroxyphenylpyruvate dioxygenase] [protein_id=KDB18363.1] [location=complement(300740..301984)] [gbkey=CDS] - [JHTR01000002.1_prot_KDB18363.1_605]	327.689	27.29	3	9	10	22	1.15525	1.11847	1.11675	0.879922	0.803535	0.840812	414	45.486	6.29053	0.744519	0.000340311
UV8b_3945	[locus_tag=UV8b_3945] [protein=nucleoporin Nup157/170] [protein_id=KDB15105.1] [location=complement(join(125814..126524,126658..129818,129889..130282))] [gbkey=CDS] - [JHTR01000018.1_prot_KDB15105.1_3945]	326.967	7.74	1	8	8	12	1.0358	0.972543	0.917827	1.06828	0.951378	0.997519	1421	156.717	6.23975	1.0311	0.562827
UV8b_6964	[locus_tag=UV8b_6964] [protein=Sec7 domain-containing protein] [protein_id=KDB12140.1] [location=complement(join(17581..17883,17943..18193,18381..18487,18636..19024,19078..19420,19472..19761,19871..22368,22438..22899,23680..23794,23848..23943,24023..24342,24423..24983,25052..25116,25184..25236))] [gbkey=CDS] - [JHTR01000049.1_prot_KDB12140.1_6964]	325.591	10	1	18	19	32	0.978802	1.00027	1.04043	1.00096	1.01881	1.00188	1950	216.305	5.22412	1.00071	0.971723
UV8b_830	[locus_tag=UV8b_830] [protein=hypothetical protein] [protein_id=KDB18588.1] [location=complement(join(1006320..1006463,1006540..1006723,1006834..1006885,1006999..1007122))] [gbkey=CDS] - [JHTR01000002.1_prot_KDB18588.1_830]	323.326	47.31	1	8	9	32	1.11597	1.11986	1.14432	0.855988	0.843693	0.852067	167	18.5017	8.96826	0.754919	8.64274e-06
UV8b_3158	[locus_tag=UV8b_3158] [protein=methylthioribose-1-phosphate isomerase] [protein_id=KDB15846.1] [location=complement(8411..9574)] [gbkey=CDS] - [JHTR01000013.1_prot_KDB15846.1_3158]	322.846	35.14	1	9	9	21	1.03149	1.00231	0.998454	0.970115	0.975555	0.967901	387	41.9667	6.07471	0.960859	0.0207178
UV8b_2303	[locus_tag=UV8b_2303] [protein=heat shock protein 78 precursor] [protein_id=KDB16712.1] [location=complement(204780..206939)] [gbkey=CDS] - [JHTR01000009.1_prot_KDB16712.1_2303]	321.644	25.03	1	15	15	24	0.979501	0.985142	1.01053	1.00127	1.03757	1.01904	719	80.0474	6.40479	1.0278	0.123616
UV8b_7712	[locus_tag=UV8b_7712] [protein=AMP-binding domain protein] [protein_id=KDB11399.1] [location=join(1273..1743,1863..2143,2233..2479,2544..2586,2656..3306,3967..4143,4356..4933)] [gbkey=CDS] - [JHTR01000071.1_prot_KDB11399.1_7712]	321.052	21.35	1	11	11	18	0.986479	0.980357	1.02569	1.00608	1.02098	0.988806	815	90.3559	6.60986	1.0078	0.670507
UV8b_4858	[locus_tag=UV8b_4858] [protein=mitochondrial intermembrane space protein Mia40] [protein_id=KDB14263.1] [location=join(247872..248082,248181..248586,248666..248924)] [gbkey=CDS] - [JHTR01000024.1_prot_KDB14263.1_4858]	319.451	32.99	1	5	5	10	0.926302	0.96187	0.944407	1.04331	1.0905	1.08115	291	31.5659	4.76709	1.13499	0.0019745
UV8b_217	[locus_tag=UV8b_217] [protein=(R)-benzylsuccinyl-CoA dehydrogenase] [protein_id=KDB18826.1] [location=join(700799..700966,701056..701130,701217..701293,701371..702115,702320..702832)] [gbkey=CDS] - [JHTR01000001.1_prot_KDB18826.1_217]	318.699	15.05	1	7	7	14	0.979564	1.01486	0.997581	0.984535	1.01332	1.01898	525	57.7578	8.96826	1.0083	0.604599
UV8b_5568	[locus_tag=UV8b_5568] [protein=GTP-binding nuclear protein RAN/TC4] [protein_id=KDB13470.1] [location=complement(join(42499..42633,42708..42913,42978..43131,43208..43300,43500..43617,44967..45279,45341..45413,45472..45624))] [gbkey=CDS] - [JHTR01000031.1_prot_KDB13470.1_5568]	318.354	30.92	1	13	13	33	0.984786	0.997846	1.08875	0.957243	1.0277	0.98683	414	45.7243	6.29053	0.967567	0.437631
UV8b_1786	[locus_tag=UV8b_1786] [protein=putative cell polarity protein (Tea1)] [protein_id=KDB17189.1] [location=join(140679..140915,141001..141376,141445..141712,141777..145245)] [gbkey=CDS] - [JHTR01000007.1_prot_KDB17189.1_1786]	317.96	14.42	1	16	16	20	0.981876	0.997944	1.00256	0.998731	0.992059	1.01411	1449	157.92	6.31592	1.00755	0.453604
UV8b_4890	[locus_tag=UV8b_4890] [protein=3-ketoacyl-CoA thiolase] [protein_id=KDB14295.1] [location=join(372688..372803,372846..373026,373120..373696,373859..374283)] [gbkey=CDS] - [JHTR01000024.1_prot_KDB14295.1_4890]	317.932	17.13	1	7	7	26	1.06452	1.08437	1.08278	0.907541	0.91628	0.907881	432	45.8464	7.98682	0.845289	1.82631e-05
UV8b_5664	[locus_tag=UV8b_5664] [protein=PWWP domain-containing protein] [protein_id=KDB13566.1] [location=complement(join(331690..332072,332197..332509,332576..332897,332980..333463,333696..333846))] [gbkey=CDS] - [JHTR01000031.1_prot_KDB13566.1_5664]	317.254	26.36	1	12	12	25	0.909288	0.943462	0.929763	1.06822	1.10884	1.08759	550	59.093	7.2251	1.17327	0.000472433
UV8b_4878	[locus_tag=UV8b_4878] [protein=aminotransferase family protein (LolT)] [protein_id=KDB14283.1] [location=join(323267..323384,323456..324696)] [gbkey=CDS] - [JHTR01000024.1_prot_KDB14283.1_4878]	316.83	23.23	1	11	11	18	1.04143	1.00965	0.978664	1.01649	0.927268	0.967005	452	50.8698	6.04932	0.96073	0.276891
UV8b_298	[locus_tag=UV8b_298] [protein=aspartate carbamoyltransferase catalytic subunit] [protein_id=KDB18907.1] [location=complement(join(1012624..1013448,1013622..1017616,1017742..1018351))] [gbkey=CDS] - [JHTR01000001.1_prot_KDB18907.1_298]	316.528	12	1	15	15	24	1.0441	1.02015	1.05118	0.954065	0.96281	0.939456	1809	196.533	8.23584	0.916836	0.00173796
UV8b_5211	[locus_tag=UV8b_5211] [protein=putative protein wos2] [protein_id=KDB13877.1] [location=join(166951..166975,167187..167579,167655..167675,167805..167974)] [gbkey=CDS] - [JHTR01000028.1_prot_KDB13877.1_5211]	315.081	40.59	1	9	9	29	0.888049	0.98656	1.06477	0.969288	1.11898	1.01952	202	22.2316	4.53857	1.05729	0.452034
UV8b_2736	[locus_tag=UV8b_2736] [protein=metallopeptidase MepB] [protein_id=KDB16280.1] [location=complement(join(170756..171023,171131..173162,174034..174267,174360..174540))] [gbkey=CDS] - [JHTR01000011.1_prot_KDB16280.1_2736]	315.025	18.58	1	14	14	27	0.994915	0.980868	1.01335	0.96715	1.04316	0.987625	904	101.374	6.22705	1.00295	0.910698
UV8b_2494	[locus_tag=UV8b_2494] [protein=mitogen activated protein kinase] [protein_id=KDB16903.1] [location=complement(join(830823..831199,831333..831714,831812..832007,832145..832257))] [gbkey=CDS] - [JHTR01000009.1_prot_KDB16903.1_2494]	314.03	19.72	1	5	5	14	0.946466	1.00995	1.11232	0.936276	1.03474	1.0246	355	41.1289	6.94678	0.976169	0.693663
UV8b_7447	[locus_tag=UV8b_7447] [protein=serine/threonine-protein phosphatase PP1] [protein_id=KDB11738.1] [location=complement(join(136772..136887,136988..137042,137268..137567,137737..138177,138249..138428))] [gbkey=CDS] - [JHTR01000061.1_prot_KDB11738.1_7447]	313.883	19.83	1	6	6	18	0.952561	1.0039	1.12525	0.910236	1.0219	0.981834	363	41.0023	5.12256	0.945568	0.409305
UV8b_8060	[locus_tag=UV8b_8060] [protein=beta-lactamase family protein] [protein_id=KDB11072.1] [location=complement(join(48091..48258,48333..48443,48511..48576))] [gbkey=CDS] - [JHTR01000081.1_prot_KDB11072.1_8060]	313.856	41.23	1	3	3	15	1.06349	1.12556	1.10995	0.887729	0.87479	0.911552	114	12.4231	5.45264	0.810571	0.000638091
UV8b_8250	[locus_tag=UV8b_8250] [protein=WD40 repeat-like-containing domain] [protein_id=KDB10912.1] [location=complement(join(37748..37963,38053..42732))] [gbkey=CDS] - [JHTR01000095.1_prot_KDB10912.1_8250]	313.175	13.43	1	16	16	28	0.970904	1.00037	1.03655	0.976022	1.0279	0.994015	1631	177.665	6.45557	0.996714	0.898801
UV8b_4404	[locus_tag=UV8b_4404] [protein=BEM46 family protein] [protein_id=KDB14881.1] [location=complement(join(484904..484947,485056..485198,485446..486084,486159..486202,486292..486423))] [gbkey=CDS] - [JHTR01000020.1_prot_KDB14881.1_4404]	312.781	9.31	1	2	2	15	1.07693	1.01616	0.931789	1.05648	0.858195	0.968484	333	36.4373	6.68311	0.953145	0.542964
UV8b_5001	[locus_tag=UV8b_5001] [protein=cystathionine gamma-lyase] [protein_id=KDB14012.1] [location=26419..27675] [gbkey=CDS] - [JHTR01000026.1_prot_KDB14012.1_5001]	311.751	8.13	2	4	4	10	1.09041	1.04913	0.994373	0.991757	0.897225	0.963098	418	44.6088	6.85889	0.91007	0.0759097
UV8b_5074	[locus_tag=UV8b_5074] [protein=Dienelactone hydrolase family] [protein_id=KDB14085.1] [location=complement(join(285421..285574,286367..286644,286739..286886,286973..287249,287312..287768))] [gbkey=CDS] - [JHTR01000026.1_prot_KDB14085.1_5074]	311.026	18.54	1	8	8	28	0.990212	0.982617	0.964551	1.00768	1.01377	1.03059	437	48.0045	6.82959	1.03903	0.020252
UV8b_1581	[locus_tag=UV8b_1581] [protein=40S ribosomal protein S9] [protein_id=KDB17697.1] [location=complement(join(685653..686064,686161..686259,686343..686407))] [gbkey=CDS] - [JHTR01000005.1_prot_KDB17697.1_1581]	311.014	43.98	1	11	11	36	1.1172	1.08652	1.04634	0.922785	0.871594	0.865874	191	21.9671	10.4478	0.818524	0.00198545
UV8b_3771	[locus_tag=UV8b_3771] [protein=fructose-1,6-bisphosphatase] [protein_id=KDB15345.1] [location=complement(join(247550..248298,250074..250855,250956..251062))] [gbkey=CDS] - [JHTR01000016.1_prot_KDB15345.1_3771]	310.568	14.68	1	5	5	15	1.00237	1.0217	1.07742	0.900662	1.04382	0.964199	545	57.3945	6.21436	0.937837	0.2444
UV8b_1431	[locus_tag=UV8b_1431] [protein=2-oxoisovalerate dehydrogenase beta subunit precursor] [protein_id=KDB17547.1] [location=join(205633..206797,207136..207217,207444..207585,207669..207687,207751..207866,208083..208135,208266..208403,208469..208817)] [gbkey=CDS] - [JHTR01000005.1_prot_KDB17547.1_1431]	310.535	11.64	1	6	6	14	1.00074	0.997639	1.00885	1.00369	1.02352	1.02383	687	74.6564	6.90283	1.01457	0.121581
UV8b_3624	[locus_tag=UV8b_3624] [protein=fes/CIP4 domain-containing protein] [protein_id=KDB15593.1] [location=join(390615..390653,390785..390877,390976..391064,391148..391815,391883..392875,393019..393719)] [gbkey=CDS] - [JHTR01000015.1_prot_KDB15593.1_3624]	310.016	12.56	1	6	7	11	0.933122	0.959319	0.954692	1.02639	1.12143	1.05843	860	92.8895	7.2251	1.12614	0.0146214
UV8b_194	[locus_tag=UV8b_194] [protein=glucosidase I] [protein_id=KDB18803.1] [location=complement(join(631511..631750,631900..633848,633984..634215))] [gbkey=CDS] - [JHTR01000001.1_prot_KDB18803.1_194]	309.725	15.51	1	10	10	17	0.966497	0.982055	1.04175	0.978826	1.08891	0.984106	806	90.7626	5.43994	1.02058	0.654968
UV8b_5416	[locus_tag=UV8b_5416] [protein=40S ribosomal protein S20] [protein_id=KDB13809.1] [location=join(400854..400895,401030..401253,401359..401443)] [gbkey=CDS] - [JHTR01000029.1_prot_KDB13809.1_5416]	309.025	46.55	1	7	7	39	1.03681	1.04836	1.0694	0.966297	0.965906	0.948061	116	13.0091	9.53955	0.913045	0.00125876
UV8b_8221	[locus_tag=UV8b_8221] [protein=hypothetical protein] [protein_id=KDB10927.1] [location=complement(join(38854..39537,39585..39710,39829..39849))] [gbkey=CDS] - [JHTR01000092.1_prot_KDB10927.1_8221]	308.799	22.46	1	5	6	13	0.963419	0.912717	0.922399	1.08179	1.04853	1.04963	276	29.093	9.51025	1.13629	0.00258713
UV8b_4138	[locus_tag=UV8b_4138] [protein=coatomer subunit epsilon] [protein_id=KDB14992.1] [location=join(258665..259064,259142..259284,259400..259638,259746..259854)] [gbkey=CDS] - [JHTR01000019.1_prot_KDB14992.1_4138]	308.228	13.51	1	4	4	14	1.03008	0.999998	0.9405	1.03741	0.981991	1.022	296	31.5874	5.17334	1.02384	0.489718
UV8b_3444	[locus_tag=UV8b_3444] [protein=hypothetical protein] [protein_id=KDB15804.1] [location=complement(501979..505410)] [gbkey=CDS] - [JHTR01000014.1_prot_KDB15804.1_3444]	306.975	18.72	2	18	18	31	1.02876	1.02112	0.991629	0.976727	0.976837	0.962591	1143	126.074	7.37158	0.958787	0.0271324
UV8b_3221	[locus_tag=UV8b_3221] [protein=mitochondrial pyruvate dehydrogenase kinase] [protein_id=KDB15909.1] [location=join(298411..298593,298742..298782,298933..299001,299106..299159,299796..299924,300099..300587,300884..302102)] [gbkey=CDS] - [JHTR01000013.1_prot_KDB15909.1_3221]	306.666	2.48	1	1	1	5	0.859574	0.92029	0.957557	1.01479	1.22333	1.13289	727	78.5529	8.89502	1.23146	0.034113
UV8b_581	[locus_tag=UV8b_581] [protein=40S ribosomal protein S25] [protein_id=KDB18339.1] [location=complement(join(232414..232436,232533..232794,232881..232952))] [gbkey=CDS] - [JHTR01000002.1_prot_KDB18339.1_581]	306.196	23.73	1	4	4	33	1.06865	1.07207	1.06701	0.943715	0.924685	0.905524	118	13.3253	9.99365	0.864762	0.000202159
UV8b_5195	[locus_tag=UV8b_5195] [protein=amine oxidase] [protein_id=KDB13861.1] [location=join(108458..108666,108750..108819,109202..109646,110386..110682,110749..110861,110940..111218)] [gbkey=CDS] - [JHTR01000028.1_prot_KDB13861.1_5195]	305.634	17.23	1	11	11	35	1.02323	1.05798	1.09571	0.889374	0.97011	0.942293	470	51.7533	10.3599	0.881915	0.0167193
UV8b_6975	[locus_tag=UV8b_6975] [protein=putative aspartate aminotransferase] [protein_id=KDB12151.1] [location=complement(join(52030..52479,52643..53292,53408..53495,53871..53990))] [gbkey=CDS] - [JHTR01000049.1_prot_KDB12151.1_6975]	303.787	34.94	1	10	11	19	0.966139	1.01275	1.03239	0.964166	1.0271	0.967028	435	47.4096	9.40771	0.982405	0.56782
UV8b_5498	[locus_tag=UV8b_5498] [protein=putative trehalose-6-phosphate synthase/trehalose phosphatase] [protein_id=KDB13666.1] [location=complement(join(222904..223469,223622..225617,225812..225937))] [gbkey=CDS] - [JHTR01000030.1_prot_KDB13666.1_5498]	303.755	18.44	1	15	15	23	1.04008	1.03918	1.00946	0.981471	0.950771	0.969457	895	99.9922	6.53662	0.939451	0.00977531
UV8b_428	[locus_tag=UV8b_428] [protein=Cell division control protein] [protein_id=KDB19037.1] [location=complement(join(1747180..1747245,1747309..1747684,1748018..1748137,1748477..1748499))] [gbkey=CDS] - [JHTR01000001.1_prot_KDB19037.1_428]	303.571	14.43	1	2	2	29	0.963317	0.932495	0.907644	1.08074	1.0543	1.07843	194	21.577	6.20166	1.14625	0.00167829
UV8b_3039	[locus_tag=UV8b_3039] [protein=asparagine synthetase] [protein_id=KDB16109.1] [location=complement(join(392999..393041,393106..393234,393276..393559,393675..394673,394755..395008,395181..395206,395262..395405,395493..395518))] [gbkey=CDS] - [JHTR01000012.1_prot_KDB16109.1_3039]	303.568	23.82	1	13	13	28	1.0379	1.03815	0.993921	0.983934	0.970985	0.990699	634	70.8879	7.04932	0.959495	0.0585666
UV8b_4095	[locus_tag=UV8b_4095] [protein=putative MAP kinase] [protein_id=KDB14949.1] [location=join(113462..113574,113737..113869,114026..114092,114244..114558,114618..115246)] [gbkey=CDS] - [JHTR01000019.1_prot_KDB14949.1_4095]	302.692	23.21	2	9	9	20	1.02148	1.06701	1.08692	0.956173	0.936066	0.940155	418	47.1397	5.71924	0.891976	0.00490113
UV8b_7854	[locus_tag=UV8b_7854] [protein=inosine-5'-monophosphate dehydrogenase IMD2] [protein_id=KDB11325.1] [location=join(100841..101321,101567..102512,102591..102783)] [gbkey=CDS] - [JHTR01000074.1_prot_KDB11325.1_7854]	301.736	18	1	8	8	16	1.04744	1.02069	1.03936	0.995904	0.939755	0.986259	539	57.1372	7.31299	0.940286	0.0315081
UV8b_8027	[locus_tag=UV8b_8027] [protein=phosphoinositide phosphatase] [protein_id=KDB11117.1] [location=complement(join(68236..68406,68567..70302,70406..70631))] [gbkey=CDS] - [JHTR01000080.1_prot_KDB11117.1_8027]	301.541	20.56	1	12	12	22	0.986445	1.00444	1.01113	0.950878	1.03025	1.00744	710	80.4099	9.33447	0.995523	0.864979
UV8b_4001	[locus_tag=UV8b_4001] [protein=putative zinc metalloprotease] [protein_id=KDB15161.1] [location=complement(join(351748..351951,352047..354261,354342..355099))] [gbkey=CDS] - [JHTR01000018.1_prot_KDB15161.1_4001]	300.415	18.24	3	15	17	32	1.01772	1.04839	1.08203	0.940364	0.974072	0.949029	1058	118.435	4.99561	0.909573	0.0109204
UV8b_2360	[locus_tag=UV8b_2360] [protein=putative FKBP-type peptidyl-prolyl isomerase] [protein_id=KDB16769.1] [location=complement(join(397405..397610,397745..398375,398434..399006,399169..399255))] [gbkey=CDS] - [JHTR01000009.1_prot_KDB16769.1_2360]	300.043	15.26	1	8	8	22	1.06415	1.04586	0.9571	0.983302	0.903833	0.973605	498	54.1632	4.55127	0.932716	0.172468
UV8b_715	[locus_tag=UV8b_715] [protein=L-threonine 3-dehydrogenase] [protein_id=KDB18473.1] [location=join(642358..642396,642456..642539,642600..642758)] [gbkey=CDS] - [JHTR01000002.1_prot_KDB18473.1_715]	299.992	36.56	1	2	2	8	0.894299	0.966055	1.50843	0.784151	1.16945	0.845728	93	10.2871	6.26514	0.830963	0.451439
UV8b_4026	[locus_tag=UV8b_4026] [protein=putative aldehyde dehydrogenase] [protein_id=KDB15186.1] [location=join(436866..436898,437093..437803,437955..438764)] [gbkey=CDS] - [JHTR01000018.1_prot_KDB15186.1_4026]	299.826	19.34	1	8	8	16	1.03013	1.00297	1.0313	0.955469	0.99067	0.980483	517	57.652	9.11475	0.95504	0.0302495
UV8b_7058	[locus_tag=UV8b_7058] [protein=nonribosomal peptide synthetase 10] [protein_id=KDB12065.1] [location=complement(join(81615..85653,85708..85808))] [gbkey=CDS] - [JHTR01000051.1_prot_KDB12065.1_7058]	299.529	12.26	1	10	10	18	1.01766	1.02797	1.00499	0.964035	0.988178	0.990326	1379	148.316	7.07861	0.96457	0.0283849
UV8b_92	[locus_tag=UV8b_92] [protein=vacuolar protein 8] [protein_id=KDB18701.1] [location=join(305153..305501,305974..306059,306133..306253,306420..306533,306600..306845,306923..307633,307766..308097)] [gbkey=CDS] - [JHTR01000001.1_prot_KDB18701.1_92]	299.153	12.73	1	5	5	11	0.970135	0.973791	0.924843	1.08395	1.06429	1.08462	652	71.0579	5.45264	1.12691	0.00207986
UV8b_511	[locus_tag=UV8b_511] [protein=cyclophilin-like peptidylprolyl cis- trans isomerase] [protein_id=KDB19120.1] [location=complement(join(2203732..2204163,2204268..2204345))] [gbkey=CDS] - [JHTR01000001.1_prot_KDB19120.1_511]	298.349	31.36	1	3	3	10	0.994431	1.00137	1.01786	0.983054	0.983749	0.969148	169	18.1222	7.54736	0.974212	0.0370591
UV8b_915	[locus_tag=UV8b_915] [protein=putative sphingolipid long chain base sensory protein] [protein_id=KDB18067.1] [location=join(222441..222497,222584..222644,222736..222869,223041..223224,223304..223905)] [gbkey=CDS] - [JHTR01000003.1_prot_KDB18067.1_915]	298.206	24.06	1	8	8	15	0.934001	0.978107	0.919479	1.11684	1.07455	1.00912	345	38.5304	5.56689	1.13029	0.0267711
UV8b_7718	[locus_tag=UV8b_7718] [protein=ssDNA binding protein] [protein_id=KDB11405.1] [location=join(32390..32667,32956..33044,33114..33163)] [gbkey=CDS] - [JHTR01000071.1_prot_KDB11405.1_7718]	298.204	31.16	1	5	5	29	1.0321	1.02197	0.990063	1.00089	0.974338	0.978547	138	15.0087	9.89111	0.970319	0.117027
UV8b_2737	[locus_tag=UV8b_2737] [protein=Crg1p S-adenosylmethionine-dependent methyltransferase] [protein_id=KDB16281.1] [location=complement(175633..176592)] [gbkey=CDS] - [JHTR01000011.1_prot_KDB16281.1_2737]	298.125	23.82	1	7	7	14	1.06627	1.06269	1.08401	0.923896	0.935283	0.908793	319	35.5115	5.85889	0.861502	0.000125796
UV8b_861	[locus_tag=UV8b_861] [protein=D-arabinitol 2-dehydrogenase] [protein_id=KDB18013.1] [location=complement(66294..67388)] [gbkey=CDS] - [JHTR01000003.1_prot_KDB18013.1_861]	298.019	23.63	1	6	6	9	0.901174	0.948392	1.02689	0.972876	1.15097	1.02958	364	38.4187	8.47021	1.09629	0.222975
UV8b_7065	[locus_tag=UV8b_7065] [protein=microtubule-associated protein EB1] [protein_id=KDB12072.1] [location=complement(join(103538..104076,104178..104290,104449..104520,104591..104604))] [gbkey=CDS] - [JHTR01000051.1_prot_KDB12072.1_7065]	297.299	42.45	1	8	8	21	1.02534	0.998047	0.959906	0.979796	0.968025	1.01984	245	27.1967	4.89404	0.994758	0.842636
UV8b_6296	[locus_tag=UV8b_6296] [protein=ribose-phosphate pyrophosphokinase] [protein_id=KDB12802.1] [location=complement(join(20371..21596,21665..21812,21889..21999))] [gbkey=CDS] - [JHTR01000039.1_prot_KDB12802.1_6296]	296.785	17.81	1	8	8	15	1.01646	1.03162	1.05886	0.956018	0.993245	0.934956	494	53.9583	7.2251	0.928317	0.0244041
UV8b_5946	[locus_tag=UV8b_5946] [protein=electron transfer flavoprotein beta-subunit] [protein_id=KDB13186.1] [location=join(177945..177995,178136..178781,178889..178971)] [gbkey=CDS] - [JHTR01000034.1_prot_KDB13186.1_5946]	296.697	29.34	1	7	7	21	1.01133	1.02303	1.03428	0.957489	0.99712	0.988948	259	28.05	8.93896	0.959238	0.0389268
UV8b_1064	[locus_tag=UV8b_1064] [protein=FAD dependent oxidoreductase] [protein_id=KDB18216.1] [location=complement(722315..723565)] [gbkey=CDS] - [JHTR01000003.1_prot_KDB18216.1_1064]	296.588	26.44	1	8	8	20	0.975542	0.980723	0.972048	1.03158	1.07636	1.02531	416	46.7021	8.95361	1.06998	0.0137128
UV8b_7788	[locus_tag=UV8b_7788] [protein=lactoylglutathione lyase] [protein_id=KDB11395.1] [location=join(107031..107077,107138..107166,107252..107688,107813..108086,108161..108336)] [gbkey=CDS] - [JHTR01000072.1_prot_KDB11395.1_7788]	296.414	25	1	6	6	13	0.960403	1.04098	1.14576	0.902162	1.07094	0.957561	320	36.4659	6.1001	0.931213	0.379576
UV8b_4275	[locus_tag=UV8b_4275] [protein=DUF255 domain protein] [protein_id=KDB14752.1] [location=join(94301..94508,94604..96250,96353..96693)] [gbkey=CDS] - [JHTR01000020.1_prot_KDB14752.1_4275]	296.288	17.37	2	9	9	14	1.01051	1.00733	0.967793	1.0442	0.98835	1.00295	731	80.1553	6.01123	1.0167	0.485371
UV8b_7570	[locus_tag=UV8b_7570] [protein=actin lateral binding protein] [protein_id=KDB11603.1] [location=complement(join(128763..128895,129048..129277,129351..129368))] [gbkey=CDS] - [JHTR01000065.1_prot_KDB11603.1_7570]	295.841	45.24	1	5	5	17	1.03376	1.01821	1.01251	0.944716	0.990441	0.976201	126	14.3235	5.07178	0.950033	0.026795
UV8b_5816	[locus_tag=UV8b_5816] [protein=proteasome component PRE2 precursor] [protein_id=KDB13437.1] [location=join(399557..399688,399800..400519)] [gbkey=CDS] - [JHTR01000032.1_prot_KDB13437.1_5816]	295.742	18.73	1	5	5	18	1.00054	1.00574	1.00802	1.01204	0.988418	0.975229	283	30.9563	6.72705	0.987188	0.306547
UV8b_6300	[locus_tag=UV8b_6300] [protein=Class E vacuolar protein-sorting machinery protein HSE1] [protein_id=KDB12806.1] [location=join(30605..30647,30798..30958,31090..31851,32048..32120,32190..32402,32499..33250)] [gbkey=CDS] - [JHTR01000039.1_prot_KDB12806.1_6300]	294.855	13.19	1	7	7	19	0.99203	0.967275	0.952153	1.029	0.990823	1.03023	667	72.585	6.34131	1.0476	0.056592
UV8b_1991	[locus_tag=UV8b_1991] [protein=60s ribosomal protein l17] [protein_id=KDB17394.1] [location=complement(join(838546..838704,838842..839029,839248..839461,839636..839744,839829..839863))] [gbkey=CDS] - [JHTR01000007.1_prot_KDB17394.1_1991]	294.585	29.06	1	6	6	27	1.02403	1.02457	1.16221	0.927983	1.00045	0.878384	234	26.3567	10.3745	0.874179	0.0811451
UV8b_411	[locus_tag=UV8b_411] [protein=phenylalanyl-tRNA synthetase, beta subunit] [protein_id=KDB19020.1] [location=join(1699306..1699358,1699450..1701226)] [gbkey=CDS] - [JHTR01000001.1_prot_KDB19020.1_411]	293.691	17.57	1	9	9	19	0.988063	1.01608	1.04934	0.968616	0.996218	0.955552	609	68.5111	5.93506	0.956413	0.106679
UV8b_3998	[locus_tag=UV8b_3998] [protein=mitochondrial presequence protease] [protein_id=KDB15158.1] [location=complement(342775..345795)] [gbkey=CDS] - [JHTR01000018.1_prot_KDB15158.1_3998]	293.564	18.99	1	15	16	25	1.02447	1.01636	0.962935	1.01604	0.95301	1.00676	1006	112.418	6.44287	0.990691	0.752077
UV8b_548	[locus_tag=UV8b_548] [protein=Guanylate-binding protein (GBP)] [protein_id=KDB18306.1] [location=complement(join(141957..142261,142341..144076,144202..144645,144760..144851))] [gbkey=CDS] - [JHTR01000002.1_prot_KDB18306.1_548]	293.354	19.11	1	15	15	30	0.981392	1.00447	1.01718	0.989756	0.999799	1.02081	858	95.6781	5.68115	1.00244	0.869272
UV8b_1259	[locus_tag=UV8b_1259] [protein=trifunctional tryptophan biosynthesis enzyme] [protein_id=KDB17892.1] [location=394971..396932] [gbkey=CDS] - [JHTR01000004.1_prot_KDB17892.1_1259]	293.193	24.66	1	12	12	22	0.939911	1.00589	1.05616	0.967168	1.08444	1.03908	653	70.5327	7.72314	1.02956	0.570677
UV8b_5298	[locus_tag=UV8b_5298] [protein=Zinc knuckle domain containing protein] [protein_id=KDB13964.1] [location=complement(join(402362..403000,403078..403383,403486..403709,403994..404211,404337..404790,405622..405778))] [gbkey=CDS] - [JHTR01000028.1_prot_KDB13964.1_5298]	292.307	15.49	1	10	10	16	0.926927	0.939366	0.99252	1.00038	1.07991	1.06738	665	73.3458	8.54346	1.10104	0.0390181
UV8b_4666	[locus_tag=UV8b_4666] [protein=GAT domain-containing protein] [protein_id=KDB14395.1] [location=complement(join(185570..186475,186538..186912,186999..187031,187105..187178,187330..187393))] [gbkey=CDS] - [JHTR01000023.1_prot_KDB14395.1_4666]	291.424	16.77	1	7	7	17	0.977168	1.01101	0.960711	0.960936	1.06462	0.992141	483	51.9157	6.7417	1.02333	0.537993
UV8b_5973	[locus_tag=UV8b_5973] [protein=putative calcium/calmodulin-dependent protein kinase] [protein_id=KDB13213.1] [location=complement(join(269439..270495,270570..270814,271230..271717,271931..271970))] [gbkey=CDS] - [JHTR01000034.1_prot_KDB13213.1_5973]	291.24	24.14	1	13	14	25	0.931523	0.970069	1.02323	0.994981	1.08816	1.05689	609	68.289	7.34229	1.07358	0.133308
UV8b_5615	[locus_tag=UV8b_5615] [protein=glycine-rich RNA-binding protein] [protein_id=KDB13517.1] [location=join(171486..171505,171609..171681,171938..172044,172154..172395,172493..172575)] [gbkey=CDS] - [JHTR01000031.1_prot_KDB13517.1_5615]	290.657	22.41	1	3	3	13	1.00952	0.962026	0.954258	1.01329	0.981323	1.04903	174	18.69	8.85107	1.04028	0.20664
UV8b_7531	[locus_tag=UV8b_7531] [protein=electron transfer flavoprotein alpha-subunit precursor] [protein_id=KDB11608.1] [location=complement(join(37121..37885,37939..38235))] [gbkey=CDS] - [JHTR01000064.1_prot_KDB11608.1_7531]	290.352	24.65	1	7	7	20	0.974805	0.980126	1.01787	1.01029	1.00496	0.982863	353	36.6646	8.22119	1.00852	0.62464
UV8b_7657	[locus_tag=UV8b_7657] [protein=putative transcription initiation factor TFIID 100Kda] [protein_id=KDB11512.1] [location=join(111615..111758,112133..112315,112367..113172,113240..114383,115131..115808,115901..116884,117049..117204)] [gbkey=CDS] - [JHTR01000067.1_prot_KDB11512.1_7657]	290.241	10.41	1	14	14	26	0.98315	0.969809	0.965592	1.01714	1.04568	1.03374	1364	149.824	6.16357	1.06099	0.00378623
UV8b_4182	[locus_tag=UV8b_4182] [protein=serum paraoxonase/arylesterase family protein] [protein_id=KDB15036.1] [location=join(404294..404632,404718..405683)] [gbkey=CDS] - [JHTR01000019.1_prot_KDB15036.1_4182]	290.195	23.5	1	7	7	21	1.16667	1.15809	1.16786	0.820572	0.799078	0.785728	434	47.5954	7.04932	0.688703	4.37551e-06
UV8b_7651	[locus_tag=UV8b_7651] [protein=ATP-binding cassette sub-family F member 2] [protein_id=KDB11506.1] [location=join(89762..90346,90517..91658,91741..91867)] [gbkey=CDS] - [JHTR01000067.1_prot_KDB11506.1_7651]	289.371	21.56	1	11	11	18	0.993513	1.045	1.07072	0.924139	1.0178	1.01486	617	68.3671	6.45557	0.950973	0.254388
UV8b_1965	[locus_tag=UV8b_1965] [protein=casein kinase I isoform epsilon] [protein_id=KDB17368.1] [location=join(768771..768782,769065..770152,770338..770395)] [gbkey=CDS] - [JHTR01000007.1_prot_KDB17368.1_1965]	289.256	32.47	1	12	12	27	0.979215	1.0103	0.990215	0.992494	1.05969	1.01267	385	43.6223	9.5542	1.02857	0.264587
UV8b_6306	[locus_tag=UV8b_6306] [protein=putative Ccr4-Not transcription complex subunit (NOT1)] [protein_id=KDB12812.1] [location=join(51250..51504,51643..51967,52062..58003,58135..58173)] [gbkey=CDS] - [JHTR01000039.1_prot_KDB12812.1_6306]	286.205	7.55	1	14	14	23	0.96449	0.974739	1.00698	1.01739	1.03015	1.02186	2186	243.895	5.97314	1.04181	0.0369706
UV8b_7609	[locus_tag=UV8b_7609] [protein=NADH:ubiquinone oxidoreductase 18.4kD subunit] [protein_id=KDB11567.1] [location=join(139539..139805,139862..140029,141157..141558)] [gbkey=CDS] - [JHTR01000066.1_prot_KDB11567.1_7609]	285.964	19.42	1	4	4	13	0.969497	0.998668	0.97243	1.04498	1.04819	1.00614	278	31.1239	9.42236	1.05397	0.0320458
UV8b_7696	[locus_tag=UV8b_7696] [protein=Xaa-Pro dipeptidase] [protein_id=KDB11473.1] [location=complement(join(134081..134180,134245..134786,134876..135515,135598..135767))] [gbkey=CDS] - [JHTR01000068.1_prot_KDB11473.1_7696]	285.744	27.74	1	11	11	19	0.983417	0.99121	0.998412	0.991454	1.02684	1.0069	483	54.1345	6.40479	1.01754	0.193046
UV8b_2120	[locus_tag=UV8b_2120] [protein=putative protein-ER retention receptor] [protein_id=KDB17028.1] [location=complement(join(399700..400389,400463..400924,400998..401012))] [gbkey=CDS] - [JHTR01000008.1_prot_KDB17028.1_2120]	285.562	28.35	1	7	7	10	0.972208	0.953094	0.954202	1.0736	1.01216	1.02933	388	44.0054	6.15088	1.08182	0.0152966
UV8b_8028	[locus_tag=UV8b_8028] [protein=cap binding protein] [protein_id=KDB11118.1] [location=join(71620..71680,71749..72224,72325..73405,73612..74498)] [gbkey=CDS] - [JHTR01000080.1_prot_KDB11118.1_8028]	285.458	13.19	1	9	9	12	0.971777	0.963991	0.973674	1.03299	1.03496	1.03353	834	92.592	5.37646	1.06601	2.93064e-05
UV8b_7470	[locus_tag=UV8b_7470] [protein=putative bifunctional purine biosynthetic protein Ade1] [protein_id=KDB11684.1] [location=complement(join(31726..31890,31963..34242))] [gbkey=CDS] - [JHTR01000062.1_prot_KDB11684.1_7470]	285.359	7.37	1	5	5	13	1.00733	1.02004	0.997198	1.0035	0.966357	1.00227	814	86.4796	5.56689	0.982661	0.275687
UV8b_7190	[locus_tag=UV8b_7190] [protein=putative PUA RNA binding domain protein] [protein_id=KDB11961.1] [location=complement(join(105480..106077,106176..106312,106388..106420))] [gbkey=CDS] - [JHTR01000054.1_prot_KDB11961.1_7190]	285.069	24.31	1	4	4	12	0.9569	1.01385	1.03433	0.961962	1.01847	0.982716	255	27.6095	6.68311	0.986045	0.648842
UV8b_1086	[locus_tag=UV8b_1086] [protein=Isopenicillin N synthase and related dioxygenase] [protein_id=KDB18238.1] [location=complement(join(784973..785003,785069..785566,785623..785700,785791..786317))] [gbkey=CDS] - [JHTR01000003.1_prot_KDB18238.1_1086]	285.021	14.59	1	4	4	10	0.968307	0.996308	0.985447	1.00579	1.03059	1.03346	377	42.3467	6.21436	1.0406	0.0290637
UV8b_4423	[locus_tag=UV8b_4423] [protein=40S ribosomal protein S13] [protein_id=KDB14900.1] [location=complement(join(542391..542564,542647..542693,542818..542850,542925..543126))] [gbkey=CDS] - [JHTR01000020.1_prot_KDB14900.1_4423]	284.957	22.52	1	4	4	21	1.12347	1.09374	1.15446	0.928942	0.853668	0.879154	151	16.7984	10.4331	0.789451	0.00110533
UV8b_722	[locus_tag=UV8b_722] [protein=vesicular-fusion protein sec17] [protein_id=KDB18480.1] [location=join(655351..655383,655474..655597,655675..655981,656136..656550)] [gbkey=CDS] - [JHTR01000002.1_prot_KDB18480.1_722]	284.806	25.68	1	7	7	13	0.936397	0.973447	0.999707	1.00328	1.08981	1.01676	292	32.477	5.19873	1.06884	0.109579
UV8b_7087	[locus_tag=UV8b_7087] [protein=hypothetical protein] [protein_id=KDB12094.1] [location=join(158136..158367,158437..158796,158878..158975)] [gbkey=CDS] - [JHTR01000051.1_prot_KDB12094.1_7087]	284.581	27.07	1	5	5	13	0.871481	0.86708	0.895558	1.09287	1.19755	1.13559	229	25.1279	9.49561	1.30063	0.00113002
UV8b_3135	[locus_tag=UV8b_3135] [protein=carbohydrate-binding module family 48 protein] [protein_id=KDB16205.1] [location=675303..676664] [gbkey=CDS] - [JHTR01000012.1_prot_KDB16205.1_3135]	284.555	15.67	1	5	5	20	0.951019	0.93386	0.96762	1.03395	1.08207	1.02149	453	45.3494	4.88135	1.09992	0.0104264
UV8b_433	[locus_tag=UV8b_433] [protein=pyruvate dehydrogenase E1 component alpha subunit] [protein_id=KDB19042.1] [location=complement(join(1761922..1762430,1762502..1762956,1763048..1763181,1763346..1763477))] [gbkey=CDS] - [JHTR01000001.1_prot_KDB19042.1_433]	284.379	43.03	1	17	17	27	0.981192	0.962191	0.970424	0.991156	1.0419	0.982259	409	45.2057	8.39697	1.03484	0.155645
UV8b_402	[locus_tag=UV8b_402] [protein=DEAD helicases superfamily protein (Aquarius)] [protein_id=KDB19011.1] [location=complement(join(1671204..1671616,1671774..1674037,1674096..1674915,1674971..1675145,1675209..1675354,1675413..1675513,1675579..1675865))] [gbkey=CDS] - [JHTR01000001.1_prot_KDB19011.1_402]	283.848	11.21	1	12	12	17	0.975849	0.978008	1.03516	0.963815	1.03534	1.01899	1401	158.98	6.32861	1.00975	0.755159
UV8b_3714	[locus_tag=UV8b_3714] [protein=hypothetical protein] [protein_id=KDB15288.1] [location=join(39972..43508,43593..45311)] [gbkey=CDS] - [JHTR01000016.1_prot_KDB15288.1_3714]	283.373	6.4	1	9	9	15	0.986063	1.01607	1.01057	0.959574	0.992292	0.981296	1751	188.559	6.354	0.973597	0.117415
UV8b_8235	[locus_tag=UV8b_8235] [protein=putative voltage-gated K channel beta subunit] [protein_id=KDB10941.1] [location=join(77199..77316,77394..77548,77618..78676)] [gbkey=CDS] - [JHTR01000092.1_prot_KDB10941.1_8235]	283.197	19.41	1	10	10	34	0.966147	0.991673	1.01381	0.972257	1.03664	0.996447	443	49.4131	7.6499	1.01135	0.654591
UV8b_2283	[locus_tag=UV8b_2283] [protein=putative L-kynurenine/alpha-aminoadipate aminotransferase] [protein_id=KDB16692.1] [location=complement(join(141220..141477,141573..142361,142401..142723,142795..142828,142901..143113))] [gbkey=CDS] - [JHTR01000009.1_prot_KDB16692.1_2283]	282.867	20.82	1	9	9	15	0.963164	0.98393	0.990497	1.01922	1.04686	1.05231	538	59.2931	6.37939	1.06155	0.0101474
UV8b_8072	[locus_tag=UV8b_8072] [protein=hypothetical protein] [protein_id=KDB11084.1] [location=join(68837..69001,69072..69194,69256..69570)] [gbkey=CDS] - [JHTR01000081.1_prot_KDB11084.1_8072]	282.459	14.5	1	2	2	11	0.962806	0.948384	0.968023	1.01865	1.08871	1.06509	200	20.5523	8.76318	1.10184	0.0102794
UV8b_1685	[locus_tag=UV8b_1685] [protein=putative eukaryotic translation initiation factor 3 subunit CLU1/TIF31] [protein_id=KDB17428.1] [location=join(139935..139965,140029..140106,140170..140228,140282..143848)] [gbkey=CDS] - [JHTR01000006.1_prot_KDB17428.1_1685]	282.094	15.19	1	14	14	23	1.00874	1.0215	1.03969	0.949144	0.994605	0.967652	1244	138.775	6.18896	0.948362	0.0296582
UV8b_4456	[locus_tag=UV8b_4456] [protein=Citrate synthase precursor] [protein_id=KDB14600.1] [location=join(85330..85446,85548..85612,85756..85949,86009..86772)] [gbkey=CDS] - [JHTR01000021.1_prot_KDB14600.1_4456]	281.729	24.8	1	10	11	23	1.09721	1.05922	1.08934	0.887037	0.89981	0.926073	379	41.8786	7.63525	0.835831	0.000403822
UV8b_5629	[locus_tag=UV8b_5629] [protein=exo-beta-1,3-glucanase] [protein_id=KDB13531.1] [location=complement(join(214490..216012,216220..216394))] [gbkey=CDS] - [JHTR01000031.1_prot_KDB13531.1_5629]	281.514	9.73	1	5	5	9	0.898394	0.904154	0.819975	1.12491	1.13268	1.09884	565	58.3404	7.48877	1.27985	0.00108366
UV8b_3789	[locus_tag=UV8b_3789] [protein=stomatin family protein] [protein_id=KDB15363.1] [location=294168..294881] [gbkey=CDS] - [JHTR01000016.1_prot_KDB15363.1_3789]	281.336	21.1	1	4	4	11	1.01212	0.974875	0.992395	0.992122	1.01372	1.01901	237	24.5747	6.81494	1.01526	0.325819
UV8b_6715	[locus_tag=UV8b_6715] [protein=Glycylpeptide N-tetradecanoyltransferase] [protein_id=KDB12491.1] [location=complement(join(228577..228972,229143..229722,229910..230607))] [gbkey=CDS] - [JHTR01000044.1_prot_KDB12491.1_6715]	281.143	19.93	1	8	9	21	1.03347	1.02202	1.06955	0.945565	0.96679	0.956056	557	61.7104	6.62451	0.917881	0.00535893
UV8b_6043	[locus_tag=UV8b_6043] [protein=cysteinyl-tRNA synthetase] [protein_id=KDB13043.1] [location=join(64217..64447,64503..65654,65812..66837)] [gbkey=CDS] - [JHTR01000036.1_prot_KDB13043.1_6043]	280.815	20.2	1	13	13	23	1.05986	1.01054	0.990939	0.987428	0.992684	0.979741	802	89.3401	6.34131	0.966847	0.179916
UV8b_8324	[locus_tag=UV8b_8324] [protein=histone H2B] [protein_id=KDB10831.1] [location=complement(join(22524..22702,22758..22829,22886..23048))] [gbkey=CDS] - [JHTR01000106.1_prot_KDB10831.1_8324]	280.417	56.2	1	13	14	49	0.923851	0.95739	1.02011	0.975069	1.07018	1.09168	137	14.836	10.1255	1.0812	0.160169
UV8b_4705	[locus_tag=UV8b_4705] [protein=cutinase negative acting protein] [protein_id=KDB14434.1] [location=complement(join(289229..289553,289623..290206,290264..290920))] [gbkey=CDS] - [JHTR01000023.1_prot_KDB14434.1_4705]	280.386	12.09	1	8	9	23	1.01275	1.09821	1.0749	0.915529	0.995474	0.948527	521	54.6462	5.14795	0.897571	0.034341
UV8b_5757	[locus_tag=UV8b_5757] [protein=60S acidic ribosomal protein P0] [protein_id=KDB13378.1] [location=join(196590..196763,196985..197758,197823..197840)] [gbkey=CDS] - [JHTR01000032.1_prot_KDB13378.1_5757]	280.293	30.84	1	8	8	14	1.05161	1.04173	0.986684	0.990066	0.942389	0.952546	321	34.4338	5.23682	0.936682	0.0591324
UV8b_5919	[locus_tag=UV8b_5919] [protein=ATP-dependent RNA helicase DED1] [protein_id=KDB13159.1] [location=complement(join(71057..72869,72989..73200))] [gbkey=CDS] - [JHTR01000034.1_prot_KDB13159.1_5919]	280.233	20.18	1	11	12	24	1.02348	1.04771	0.997127	1.00161	0.969236	0.949996	674	71.5843	8.22119	0.951937	0.0791184
UV8b_7894	[locus_tag=UV8b_7894] [protein=NIPSNAP family protein] [protein_id=KDB11284.1] [location=join(99072..99648,99726..100210)] [gbkey=CDS] - [JHTR01000075.1_prot_KDB11284.1_7894]	279.207	23.23	1	7	7	16	0.98403	0.995058	0.984253	0.986653	1.01304	1.01411	353	40.1624	9.42236	1.01703	0.15755
UV8b_2580	[locus_tag=UV8b_2580] [protein=hypothetical protein] [protein_id=KDB16545.1] [location=complement(join(238001..238005,238046..238270,238333..241655,241709..241755))] [gbkey=CDS] - [JHTR01000010.1_prot_KDB16545.1_2580]	279.026	13.43	1	13	13	21	1.02297	1.02733	1.00406	0.971789	0.971152	0.99366	1199	133.135	9.46631	0.961447	0.0188203
UV8b_2748	[locus_tag=UV8b_2748] [protein=NAD dependent epimerase] [protein_id=KDB16292.1] [location=200602..201486] [gbkey=CDS] - [JHTR01000011.1_prot_KDB16292.1_2748]	278.723	31.29	1	9	9	30	1.03509	1.0258	1.03062	0.984433	0.948943	0.960966	294	33.3749	8.47021	0.93622	0.00363649
UV8b_3284	[locus_tag=UV8b_3284] [protein=glucosidase 2 subunit beta precursor] [protein_id=KDB15972.1] [location=join(520707..520806,520986..521933,522003..522739)] [gbkey=CDS] - [JHTR01000013.1_prot_KDB15972.1_3284]	278.597	17.68	2	13	13	24	1.01471	1.03944	1.10532	0.913097	0.979449	0.939377	594	64.9437	5.19873	0.89633	0.0303016
UV8b_5799	[locus_tag=UV8b_5799] [protein=aminoadipate reductase enzyme] [protein_id=KDB13420.1] [location=join(324744..324807,324981..325176,325353..326932,327076..328889)] [gbkey=CDS] - [JHTR01000032.1_prot_KDB13420.1_5799]	278.526	19.47	1	17	17	26	1.0107	0.990343	0.947743	1.05709	0.956304	1.01487	1217	132.052	6.99072	1.02695	0.486707
UV8b_97	[locus_tag=UV8b_97] [protein=homocitrate synthase] [protein_id=KDB18706.1] [location=complement(join(316028..316124,316183..316330,316497..316550,316769..316796,316890..317006,317073..317119,317179..317239,317316..317520,317578..317726,317795..317808,317885..317948,318012..318072,318143..318158,318258..318432))] [gbkey=CDS] - [JHTR01000001.1_prot_KDB18706.1_97]	278.181	25.55	2	6	11	27	0.996701	1.02065	1.07062	0.91105	0.996429	0.959688	411	44.7188	6.1001	0.928496	0.0892295
UV8b_2345	[locus_tag=UV8b_2345] [protein=cytochrome P450 78A3] [protein_id=KDB16754.1] [location=join(341587..342916,344796..350927,351030..359579,359650..361454)] [gbkey=CDS] - [JHTR01000009.1_prot_KDB16754.1_2345]	277.701	4.19	1	19	20	27	0.982552	0.995542	0.950275	1.04025	1.02203	1.03713	5938	642.601	5.021	1.05841	0.0174115
UV8b_1952	[locus_tag=UV8b_1952] [protein=Cutinase gene palindrome-binding protein] [protein_id=KDB17355.1] [location=complement(join(714670..714828,714904..715079,715216..715374,715461..715472,715804..715951,717330..717457,717532..718777,718881..719009))] [gbkey=CDS] - [JHTR01000007.1_prot_KDB17355.1_1952]	276.704	16.02	1	5	5	7	1.12085	1.07621	1.03551	0.881404	0.842851	0.900364	718	77.2226	6.31592	0.811929	0.00247205
UV8b_3275	[locus_tag=UV8b_3275] [protein=nmt1 protein] [protein_id=KDB15963.1] [location=complement(join(481871..482692,482856..482885,482963..483065,483147..483181))] [gbkey=CDS] - [JHTR01000013.1_prot_KDB15963.1_3275]	276.255	19.45	1	5	5	15	0.873273	0.895141	0.904296	1.11386	1.17253	1.10796	329	36.9785	5.97314	1.27	0.000438999
UV8b_6111	[locus_tag=UV8b_6111] [protein=protein kinase gsk3] [protein_id=KDB13111.1] [location=join(292404..292449,292524..292696,292757..292840,292898..293281)] [gbkey=CDS] - [JHTR01000036.1_prot_KDB13111.1_6111]	276.152	39.04	1	7	7	19	1.01598	1.01102	0.995172	0.993176	0.967832	0.994237	228	26.0796	9.45166	0.977854	0.104743
UV8b_629	[locus_tag=UV8b_629] [protein=EF hand domain protein] [protein_id=KDB18387.1] [location=join(401393..401420,401546..401700,401788..404657,404756..405443,405508..405537)] [gbkey=CDS] - [JHTR01000002.1_prot_KDB18387.1_629]	275.399	14.41	1	11	11	21	0.975224	0.953196	0.93793	1.07845	1.03288	1.05221	1256	131.46	5.08447	1.10368	0.00438987
UV8b_324	[locus_tag=UV8b_324] [protein=serine/threonine protein phosphatase PP2A catalytic subunit] [protein_id=KDB18933.1] [location=join(1088158..1088313,1088541..1088582,1088657..1088762,1088828..1089361,1089460..1089532,1089608..1089657,1089734..1089756)] [gbkey=CDS] - [JHTR01000001.1_prot_KDB18933.1_324]	275.329	21.71	1	5	5	14	1.00571	0.983121	0.921188	1.08813	0.978515	1.02523	327	37.16	4.93213	1.06249	0.209557
UV8b_5120	[locus_tag=UV8b_5120] [protein=arg-6 protein precursor] [protein_id=KDB14131.1] [location=complement(428061..429710)] [gbkey=CDS] - [JHTR01000026.1_prot_KDB14131.1_5120]	274.249	17.3	1	8	8	17	1.0022	1.01705	1.04793	0.95256	1.00782	0.98453	549	60.0491	7.73779	0.960135	0.123288
UV8b_913	[locus_tag=UV8b_913] [protein=receptor-associated protein] [protein_id=KDB18065.1] [location=complement(join(215057..215411,215507..215659,215782..215867,216007..216027))] [gbkey=CDS] - [JHTR01000003.1_prot_KDB18065.1_913]	273.725	25.49	1	8	8	18	0.981284	0.993998	0.964131	1.03344	1.01173	1.01447	204	23.7506	9.27588	1.0409	0.0220468
UV8b_7825	[locus_tag=UV8b_7825] [protein=hypothetical protein] [protein_id=KDB11296.1] [location=complement(join(270..2559,2613..2767))] [gbkey=CDS] - [JHTR01000074.1_prot_KDB11296.1_7825]	273.469	11.43	1	7	8	13	1.00174	1.02371	1.02377	0.946282	1.0078	0.980086	814	87.6633	9.1001	0.962271	0.117032
UV8b_901	[locus_tag=UV8b_901] [protein=3'-phosphoadenosine 5'-phosphatase isoform A] [protein_id=KDB18053.1] [location=complement(188971..190059)] [gbkey=CDS] - [JHTR01000003.1_prot_KDB18053.1_901]	270.834	21.55	1	5	5	13	0.99941	0.98909	0.93968	1.03862	1.02154	0.994231	362	38.5799	5.85889	1.0431	0.135047
UV8b_2441	[locus_tag=UV8b_2441] [protein=putative nuclear protein SA-1] [protein_id=KDB16850.1] [location=join(662070..662478,662584..662792,662914..665832)] [gbkey=CDS] - [JHTR01000009.1_prot_KDB16850.1_2441]	270.29	6.62	1	6	6	9	0.973228	0.952919	1.02002	0.995456	1.04089	1.03568	1178	130.65	5.0083	1.04272	0.162114
UV8b_8279	[locus_tag=UV8b_8279] [protein=putative WD40 domain-containing protein] [protein_id=KDB10875.1] [location=complement(join(26317..28035,28144..28257))] [gbkey=CDS] - [JHTR01000102.1_prot_KDB10875.1_8279]	269.107	17.7	2	11	11	23	1.00023	1.02291	1.06419	0.955073	1.02196	0.968389	610	64.5046	7.6499	0.954036	0.163128
UV8b_7144	[locus_tag=UV8b_7144] [protein=Rho-GTPase-activating protein 8] [protein_id=KDB12001.1] [location=complement(join(52752..53620,53757..55206,55302..55483,55551..55596))] [gbkey=CDS] - [JHTR01000053.1_prot_KDB12001.1_7144]	269.053	18.87	2	12	13	25	0.991514	1.01573	1.02443	0.98476	1.02191	0.978054	848	94.3202	7.04932	0.984511	0.404822
UV8b_307	[locus_tag=UV8b_307] [protein=SNARE domain-containing protein] [protein_id=KDB18916.1] [location=join(1047359..1047379,1047469..1047551,1047707..1047789,1047910..1048275,1048377..1048417)] [gbkey=CDS] - [JHTR01000001.1_prot_KDB18916.1_307]	269.005	35.03	1	7	7	22	1.00006	1.00917	1.05259	0.997107	1.01617	0.988552	197	22.5313	7.1665	0.980406	0.33235
UV8b_5342	[locus_tag=UV8b_5342] [protein=cytochrome c1, heme protein precursor] [protein_id=KDB13735.1] [location=join(112680..112754,112929..113086,113251..113313,113403..114075)] [gbkey=CDS] - [JHTR01000029.1_prot_KDB13735.1_5342]	268.55	32.3	1	7	7	23	0.979012	0.987617	0.970308	1.03722	1.02506	1.04304	322	35.2857	7.48877	1.05733	0.00152474
UV8b_2662	[locus_tag=UV8b_2662] [protein=elongation factor Tu precursor] [protein_id=KDB16627.1] [location=complement(join(561570..562684,562859..563033))] [gbkey=CDS] - [JHTR01000010.1_prot_KDB16627.1_2662]	268.407	24.24	1	7	7	17	1.01091	1.01455	1.02007	1.02285	0.983986	0.969436	429	47.9415	6.88818	0.977264	0.226512
UV8b_5804	[locus_tag=UV8b_5804] [protein=ATP synthase gamma chain precursor] [protein_id=KDB13425.1] [location=join(351640..351695,351866..352458,352531..352664,352767..352895)] [gbkey=CDS] - [JHTR01000032.1_prot_KDB13425.1_5804]	267.729	28.38	1	9	9	19	0.990466	0.979466	1.00421	0.981242	1.05188	1.01095	303	32.6538	7.21045	1.02352	0.342975
UV8b_6361	[locus_tag=UV8b_6361] [protein=vacuolar protease A] [protein_id=KDB12705.1] [location=complement(join(11195..12129,12200..12356,12455..12553))] [gbkey=CDS] - [JHTR01000040.1_prot_KDB12705.1_6361]	267.026	18.18	1	10	10	27	0.99131	0.982861	0.980501	1.04352	0.960102	0.979715	396	42.5434	5.14795	1.0097	0.725834
UV8b_3760	[locus_tag=UV8b_3760] [protein=protein transport protein SEC13] [protein_id=KDB15334.1] [location=join(200324..200659,200773..200814,200976..201091,201294..202047)] [gbkey=CDS] - [JHTR01000016.1_prot_KDB15334.1_3760]	266.965	21.45	1	8	8	23	0.975149	0.988412	0.989534	1.0557	0.994524	1.0003	415	44.9533	7.57666	1.03299	0.180449
UV8b_4328	[locus_tag=UV8b_4328] [protein=putative oxidoreductase,short chain dehydrogenase] [protein_id=KDB14805.1] [location=complement(join(245739..246487,246583..247112,247173..247186))] [gbkey=CDS] - [JHTR01000020.1_prot_KDB14805.1_4328]	266.962	17.67	1	6	6	15	1.03888	1.04909	1.09309	0.881466	0.97425	0.934191	430	47.0465	9.5542	0.877037	0.0145394
UV8b_5746	[locus_tag=UV8b_5746] [protein=phosphomannomutase] [protein_id=KDB13367.1] [location=join(170836..170937,171109..171566,171658..171910)] [gbkey=CDS] - [JHTR01000032.1_prot_KDB13367.1_5746]	266.135	19.63	1	7	7	32	1.03496	1.05847	1.02475	0.957152	0.940438	0.980605	270	30.1333	5.5542	0.923036	0.00645255
UV8b_1218	[locus_tag=UV8b_1218] [protein=putative cyanate lyase] [protein_id=KDB17851.1] [location=complement(join(262836..263279,263354..263404))] [gbkey=CDS] - [JHTR01000004.1_prot_KDB17851.1_1218]	265.945	20.12	1	2	2	12	1.08194	1.07527	0.913672	0.996048	0.866721	1.00901	164	17.955	4.94482	0.935167	0.404897
UV8b_1185	[locus_tag=UV8b_1185] [protein=succinate dehydrogenase iron-sulfur protein precursor] [protein_id=KDB17818.1] [location=complement(join(98600..98923,98998..99149,99328..99658))] [gbkey=CDS] - [JHTR01000004.1_prot_KDB17818.1_1185]	265.825	29.85	1	9	9	19	1.01104	0.975925	0.947169	1.05042	0.989311	0.999378	268	30.4662	8.93896	1.03578	0.256249
UV8b_2775	[locus_tag=UV8b_2775] [protein=glutathione s-transferase GST3] [protein_id=KDB16319.1] [location=complement(join(267742..268284,268427..268732,268852..269058))] [gbkey=CDS] - [JHTR01000011.1_prot_KDB16319.1_2775]	264.967	12.82	1	4	4	9	1.04695	1.07332	0.973739	0.955288	0.943791	0.983851	351	40.8903	6.99072	0.931776	0.0933519
UV8b_6321	[locus_tag=UV8b_6321] [protein=3,4-dihydroxy-2-butanone 4-phosphate synthase] [protein_id=KDB12827.1] [location=complement(join(196276..196907,197032..197095))] [gbkey=CDS] - [JHTR01000039.1_prot_KDB12827.1_6321]	264.885	12.99	1	3	3	10	1.03687	0.981694	0.983023	1.00983	1.01265	1.02109	231	24.5364	5.31299	1.01399	0.49122
UV8b_6506	[locus_tag=UV8b_6506] [protein=STF2-like protein] [protein_id=KDB12660.1] [location=join(166700..166742,167617..167773,167854..168073)] [gbkey=CDS] - [JHTR01000041.1_prot_KDB12660.1_6506]	264.842	31.65	1	5	5	14	1.09251	1.09358	1.14025	0.850467	0.9206	0.883521	139	15.3384	6.41748	0.798049	0.000948827
UV8b_24	[locus_tag=UV8b_24] [protein=formyltetrahydrofolate deformylase] [protein_id=KDB18633.1] [location=join(92999..93352,93501..94007)] [gbkey=CDS] - [JHTR01000001.1_prot_KDB18633.1_24]	264.821	42.66	1	10	10	22	0.980922	0.990494	1.02298	1.02154	1.01149	0.992498	286	31.8375	7.47412	1.01039	0.535198
UV8b_5231	[locus_tag=UV8b_5231] [protein=glycosyltransferase family 31 protein] [protein_id=KDB13897.1] [location=complement(join(216534..217073,217148..218299))] [gbkey=CDS] - [JHTR01000028.1_prot_KDB13897.1_5231]	264.439	17.94	1	10	10	15	1.03073	1.02392	1.01047	0.990332	0.943475	0.983511	563	62.5385	6.90283	0.95178	0.0354631
UV8b_6956	[locus_tag=UV8b_6956] [protein=Cel3c putative beta-glucosidase] [protein_id=KDB12252.1] [location=complement(join(237206..239649,239778..239847))] [gbkey=CDS] - [JHTR01000048.1_prot_KDB12252.1_6956]	263.718	8.72	1	7	7	21	1.16471	1.15498	1.0783	0.890433	0.77846	0.853349	837	90.9655	5.31299	0.742275	0.00241434
UV8b_7019	[locus_tag=UV8b_7019] [protein=methyltransferase domain-containing protein] [protein_id=KDB12195.1] [location=join(198232..198387,198574..198720,198803..199315)] [gbkey=CDS] - [JHTR01000049.1_prot_KDB12195.1_7019]	263.552	27.68	1	4	4	10	1.06649	1.04009	1.01748	0.972208	0.894891	0.951118	271	30.3405	5.51611	0.902098	0.0196808
UV8b_2004	[locus_tag=UV8b_2004] [protein=Importin-beta domain containing protein] [protein_id=KDB17407.1] [location=join(885645..885734,886184..886262,886349..886815,886949..887133,887194..888377,888532..889209,889317..889495,889634..889783)] [gbkey=CDS] - [JHTR01000007.1_prot_KDB17407.1_2004]	263.402	19.94	1	17	17	29	0.991887	1.02259	1.03629	0.966855	0.962957	0.998137	1003	114.668	5.021	0.959742	0.0761236
UV8b_7684	[locus_tag=UV8b_7684] [protein=hypothetical protein] [protein_id=KDB11461.1] [location=join(86617..87680,87743..87806)] [gbkey=CDS] - [JHTR01000068.1_prot_KDB11461.1_7684]	262.274	34.4	1	9	9	17	0.947044	0.943275	0.928241	1.06774	1.07238	1.07214	375	43.1779	5.12256	1.13968	2.48052e-05
UV8b_8262	[locus_tag=UV8b_8262] [protein=60S ribosomal protein L28] [protein_id=KDB10890.1] [location=complement(join(53579..53750,53848..53972,54074..54097,54159..54253,54329..54383))] [gbkey=CDS] - [JHTR01000100.1_prot_KDB10890.1_8262]	261.153	35.9	1	8	8	36	1.09645	1.10119	0.975835	0.971551	0.888406	0.967697	156	16.861	10.4771	0.891027	0.078954
UV8b_1988	[locus_tag=UV8b_1988] [protein=T-complex protein 1 subunit alpha] [protein_id=KDB17391.1] [location=complement(join(829658..831184,831331..831416,831491..831578))] [gbkey=CDS] - [JHTR01000007.1_prot_KDB17391.1_1988]	259.882	14.31	1	7	7	15	0.940554	1.00407	1.0823	0.948206	1.05908	1.03237	566	61.4971	6.30322	1.00421	0.939861
UV8b_2100	[locus_tag=UV8b_2100] [protein=peptidoglycan binding domain containing protein] [protein_id=KDB17008.1] [location=join(349829..350084,350186..350665,350770..351590)] [gbkey=CDS] - [JHTR01000008.1_prot_KDB17008.1_2100]	258.654	18.34	1	9	10	22	0.915309	0.953528	0.97545	1.01296	1.11659	1.03536	518	56.9391	7.53271	1.11272	0.0413766
UV8b_6685	[locus_tag=UV8b_6685] [protein=MFS multidrug transporter] [protein_id=KDB12461.1] [location=complement(116108..117964)] [gbkey=CDS] - [JHTR01000044.1_prot_KDB12461.1_6685]	257.634	8.09	1	4	4	7	0.853533	0.878837	0.958146	1.04711	1.1244	1.1031	618	66.3861	8.29443	1.21709	0.00755901
UV8b_5871	[locus_tag=UV8b_5871] [protein=RHO protein GDP dissociation inhibitor containing protein] [protein_id=KDB13281.1] [location=join(181173..181266,181467..181789,181852..181900,181981..182111)] [gbkey=CDS] - [JHTR01000033.1_prot_KDB13281.1_5871]	257.559	32.83	1	4	4	14	0.971364	1.03984	1.09531	0.930802	1.00855	0.958934	198	22.0338	5.65576	0.932969	0.177309
UV8b_5677	[locus_tag=UV8b_5677] [protein=proteasome regulatory particle subunit Rpt4] [protein_id=KDB13579.1] [location=complement(join(374631..374751,374813..375269,375342..375728,375805..376015))] [gbkey=CDS] - [JHTR01000031.1_prot_KDB13579.1_5677]	256.318	28.64	2	7	9	23	0.988803	0.984878	0.982024	1.01992	1.01279	1.01555	391	44.0442	5.8208	1.03131	0.000418122
UV8b_7952	[locus_tag=UV8b_7952] [protein=gamma-glutamyl phosphate reductase] [protein_id=KDB11219.1] [location=complement(join(105360..106237,106326..106487,106566..106866))] [gbkey=CDS] - [JHTR01000077.1_prot_KDB11219.1_7952]	256.116	21.97	1	7	7	17	0.925086	0.9447	0.980105	1.03433	1.10795	1.06569	446	46.9986	5.88428	1.12565	0.0111037
UV8b_2066	[locus_tag=UV8b_2066] [protein=WD repeat containing protein 36] [protein_id=KDB16974.1] [location=complement(join(227169..229434,229547..229764,230356..230666,230766..233454,233549..233662))] [gbkey=CDS] - [JHTR01000008.1_prot_KDB16974.1_2066]	255.418	9.44	2	14	14	20	1.01257	1.009	0.98105	1.0208	0.980818	0.985491	1865	204.739	6.78564	0.994834	0.763916
UV8b_1025	[locus_tag=UV8b_1025] [protein=vacuolar protein sorting-associated protein vps17] [protein_id=KDB18177.1] [location=join(601622..602092,602165..602618,602713..603425,603481..603495)] [gbkey=CDS] - [JHTR01000003.1_prot_KDB18177.1_1025]	255.011	20.18	1	9	9	17	1.00478	0.976012	1.03225	0.975907	1.05455	0.989547	550	60.7787	8.42627	1.00231	0.940493
UV8b_1267	[locus_tag=UV8b_1267] [protein=Guanine nucleotide-binding protein alpha subunit] [protein_id=KDB17900.1] [location=complement(join(408842..408885,408957..409513,409586..409928,410092..410209))] [gbkey=CDS] - [JHTR01000004.1_prot_KDB17900.1_1267]	253.572	26.91	1	9	9	23	0.996855	0.951585	0.962903	1.02233	1.03983	1.02761	353	41.0415	5.22412	1.06129	0.015019
UV8b_3147	[locus_tag=UV8b_3147] [protein=sucrose-6-phosphate hydrolase] [protein_id=KDB16217.1] [location=complement(703919..705688)] [gbkey=CDS] - [JHTR01000012.1_prot_KDB16217.1_3147]	253.477	16.81	1	7	7	13	1.05426	1.05574	1.04935	1.01556	0.906062	0.931327	589	64.872	5.85889	0.90302	0.0369308
UV8b_7891	[locus_tag=UV8b_7891] [protein=26S proteasome non-ATPase regulatory subunit 12] [protein_id=KDB11281.1] [location=join(93969..94052,94116..94172,94231..94950,95026..95613)] [gbkey=CDS] - [JHTR01000075.1_prot_KDB11281.1_7891]	253.288	16.39	1	10	11	26	0.978006	1.00477	1.01536	0.988872	1.04348	1.00612	482	55.328	6.91748	1.01345	0.529939
UV8b_7590	[locus_tag=UV8b_7590] [protein=NADH-ubiquinone oxidoreductase 40 kDa subunit-like protein] [protein_id=KDB11548.1] [location=join(60236..60376,60426..60517,60568..60709,60757..60915,60968..61303,61357..61455)] [gbkey=CDS] - [JHTR01000066.1_prot_KDB11548.1_7590]	253.215	31.99	1	8	8	20	1.00495	0.99852	0.970407	1.02619	1.02285	1.01805	322	36.7629	6.25244	1.03135	0.0459435
UV8b_4607	[locus_tag=UV8b_4607] [protein=putative UV excision repair protein (RadW)] [protein_id=KDB14557.1] [location=join(491085..491102,491299..491346,491455..491542,491599..491678,491751..492095,492163..492651,492746..492871)] [gbkey=CDS] - [JHTR01000022.1_prot_KDB14557.1_4607]	252.758	11.08	1	4	4	14	0.964489	0.996482	1.06077	0.950779	1.06298	0.992849	397	41.7736	4.729	0.994992	0.912821
UV8b_1418	[locus_tag=UV8b_1418] [protein=manganese superoxide dismutase] [protein_id=KDB17534.1] [location=join(161887..162010,162125..162390,162478..162777)] [gbkey=CDS] - [JHTR01000005.1_prot_KDB17534.1_1418]	252.254	7.42	1	1	1	12	0.89831	0.873203	0.878747	1.1253	1.13709	1.13936	229	25.0328	7.26904	1.28356	8.95669e-06
UV8b_8306	[locus_tag=UV8b_8306] [protein=biotin protein ligase] [protein_id=KDB10862.1] [location=join(51297..51522,51889..52323,52498..52678,52931..53252)] [gbkey=CDS] - [JHTR01000103.1_prot_KDB10862.1_8306]	251.834	13.7	7	3	4	9	0.879431	0.873261	0.878663	1.11716	1.22788	1.11242	387	41.7512	9.31982	1.31394	0.00188156
UV8b_2935	[locus_tag=UV8b_2935] [protein=protein kinase SNF1] [protein_id=KDB16005.1] [location=join(93981..94399,94458..95293,95397..96041,96109..96398)] [gbkey=CDS] - [JHTR01000012.1_prot_KDB16005.1_2935]	251.436	16.46	1	11	11	18	1.01796	1.01031	0.986572	1.00423	0.972617	1.00805	729	81.8917	7.10791	0.990067	0.533673
UV8b_3509	[locus_tag=UV8b_3509] [protein=threonine ammonia-lyase precursor] [protein_id=KDB15478.1] [location=complement(53108..54628)] [gbkey=CDS] - [JHTR01000015.1_prot_KDB15478.1_3509]	251.048	25.89	1	10	10	19	1.06385	1.04248	1.02359	1.00036	0.917668	0.952942	506	55.3062	6.55127	0.917264	0.0316278
UV8b_1009	[locus_tag=UV8b_1009] [protein=branched-chain-amino-acid aminotransferase] [protein_id=KDB18161.1] [location=join(564737..564806,564929..566037)] [gbkey=CDS] - [JHTR01000003.1_prot_KDB18161.1_1009]	250.88	19.9	1	7	7	16	0.963793	0.988659	1.01904	0.987515	1.05834	1.00856	392	41.5698	6.44287	1.02791	0.353909
UV8b_1141	[locus_tag=UV8b_1141] [protein=hydroxyisocaproate dehydrogenase] [protein_id=KDB18293.1] [location=complement(join(957234..957407,957517..958130,958200..958314,958404..958502,958587..958685))] [gbkey=CDS] - [JHTR01000003.1_prot_KDB18293.1_1141]	250.687	43.44	1	10	10	20	0.978912	0.972361	0.968702	1.01695	1.05866	1.00354	366	39.4787	6.90283	1.05451	0.0346401
UV8b_4464	[locus_tag=UV8b_4464] [protein=O-acetylhomoserin (thiol)-lyase] [protein_id=KDB14608.1] [location=join(119024..119029,119121..120083)] [gbkey=CDS] - [JHTR01000021.1_prot_KDB14608.1_4464]	250.412	26.09	1	8	8	15	1.0536	1.06048	1.04825	0.92227	0.922782	0.927983	322	34.1568	8.70459	0.876896	5.27847e-06
UV8b_4887	[locus_tag=UV8b_4887] [protein=hypothetical protein] [protein_id=KDB14292.1] [location=join(362631..362636,363784..364434)] [gbkey=CDS] - [JHTR01000024.1_prot_KDB14292.1_4887]	250.123	23.85	1	4	4	9	1.01246	0.989791	0.990648	1.02851	1.00933	0.983183	218	24.6454	6.52197	1.0094	0.567838
UV8b_2904	[locus_tag=UV8b_2904] [protein=twinfilin-1] [protein_id=KDB16448.1] [location=complement(join(653283..653678,653746..654329,654395..654413))] [gbkey=CDS] - [JHTR01000011.1_prot_KDB16448.1_2904]	249.902	26.2	1	6	6	12	0.985063	1.02079	1.09377	0.896285	1.00981	0.984686	332	36.5092	7.29834	0.932623	0.212638
UV8b_5353	[locus_tag=UV8b_5353] [protein=CFEM domain-containing protein] [protein_id=KDB13746.1] [location=complement(join(144912..145304,145480..145560))] [gbkey=CDS] - [JHTR01000029.1_prot_KDB13746.1_5353]	249.872	13.38	1	2	2	8	0.972534	0.960267	1.02889	1.02544	1.03102	1.02746	157	15.3375	7.50342	1.04127	0.126881
UV8b_4336	[locus_tag=UV8b_4336] [protein=phospho-2-dehydro-3-deoxyheptonate aldolase] [protein_id=KDB14813.1] [location=join(264033..264038,264119..264176,264301..265203,265312..265472)] [gbkey=CDS] - [JHTR01000020.1_prot_KDB14813.1_4336]	249.64	24	2	7	8	15	0.909985	0.972987	1.07926	0.91148	1.12044	1.06821	375	40.497	7.34229	1.04655	0.595833
UV8b_2016	[locus_tag=UV8b_2016] [protein=conserved serine-threonine rich protein] [protein_id=KDB16924.1] [location=complement(64204..66915)] [gbkey=CDS] - [JHTR01000008.1_prot_KDB16924.1_2016]	249.59	22.15	1	13	13	17	1.00678	0.996658	0.988718	1.03496	1.01657	1.00832	903	100.432	5.70654	1.02262	0.0753532
UV8b_4079	[locus_tag=UV8b_4079] [protein=putative methionyl aminopeptidase] [protein_id=KDB14933.1] [location=complement(join(77833..77889,77980..78066,78147..79294,79382..79424))] [gbkey=CDS] - [JHTR01000019.1_prot_KDB14933.1_4079]	248.646	24.77	1	8	8	17	1.02196	1.01131	1.02505	0.986116	0.981585	0.988375	444	48.5252	5.74463	0.966568	0.00179068
UV8b_5289	[locus_tag=UV8b_5289] [protein=5'-nucleotidase precursor] [protein_id=KDB13955.1] [location=join(378042..378162,378298..379925)] [gbkey=CDS] - [JHTR01000028.1_prot_KDB13955.1_5289]	247.784	21.82	1	9	9	22	0.890701	0.905615	0.90138	1.07063	1.14432	1.13298	582	63.135	6.58057	1.24103	0.000747261
UV8b_2618	[locus_tag=UV8b_2618] [protein=protein kinase domain-containing protein] [protein_id=KDB16583.1] [location=complement(363478..364254)] [gbkey=CDS] - [JHTR01000010.1_prot_KDB16583.1_2618]	247.432	31.01	1	6	6	13	1.02356	0.989655	1.01676	1.0134	0.988217	0.983168	258	29.8433	6.53662	0.985083	0.340985
UV8b_5370	[locus_tag=UV8b_5370] [protein=calcofluor white hypersensitive protein] [protein_id=KDB13763.1] [location=complement(join(190544..190717,190941..191056,191187..191298))] [gbkey=CDS] - [JHTR01000029.1_prot_KDB13763.1_5370]	247.235	37.59	1	6	6	27	0.942648	0.979153	0.989924	0.967528	1.07594	1.04787	133	13.7301	9.24658	1.06168	0.16694
UV8b_4297	[locus_tag=UV8b_4297] [protein=putative protein kinase activator (Mob2)] [protein_id=KDB14774.1] [location=join(164873..164895,165545..165903,165966..166077,166146..166692)] [gbkey=CDS] - [JHTR01000020.1_prot_KDB14774.1_4297]	246.994	26.01	2	8	8	17	1.01555	1.02942	1.04033	0.946465	0.970292	0.999918	346	38.6021	7.28369	0.945345	0.0299867
UV8b_1745	[locus_tag=UV8b_1745] [protein=eukaryotic translation initiation factor eIF-1A] [protein_id=KDB17148.1] [location=join(2290..2310,2439..2597,2907..3197)] [gbkey=CDS] - [JHTR01000007.1_prot_KDB17148.1_1745]	246.936	32.69	1	5	5	19	1.00272	1.049	1.06463	0.900487	0.978723	0.980707	156	17.7428	5.17334	0.917716	0.0571972
UV8b_6367	[locus_tag=UV8b_6367] [protein=histone H1] [protein_id=KDB12711.1] [location=complement(join(35774..35899,36013..36369,36704..36730,36792..36857))] [gbkey=CDS] - [JHTR01000040.1_prot_KDB12711.1_6367]	246.258	54.45	6	11	14	46	0.926393	0.937372	0.960405	1.02262	1.12947	1.03298	191	19.8601	10.4478	1.12779	0.0274852
UV8b_3889	[locus_tag=UV8b_3889] [protein=vacuolar ATP synthase subunit D] [protein_id=KDB15226.1] [location=join(35291..35361,35426..35436,35492..35866,35921..36027,36098..36259)] [gbkey=CDS] - [JHTR01000017.1_prot_KDB15226.1_3889]	246.167	26.14	1	7	8	22	0.983804	0.97321	0.995639	0.992718	1.03705	1.00973	241	27.0831	6.63916	1.02941	0.11563
UV8b_1269	[locus_tag=UV8b_1269] [protein=smr domain-containing protein] [protein_id=KDB17902.1] [location=join(414856..414889,414986..415086,415187..415756)] [gbkey=CDS] - [JHTR01000004.1_prot_KDB17902.1_1269]	245.799	18.8	1	4	4	12	0.945726	0.966557	0.933896	1.0703	1.06282	1.05233	234	26.221	7.95752	1.1192	0.000483014
UV8b_5833	[locus_tag=UV8b_5833] [protein=carboxypeptidase Y precursor] [protein_id=KDB13454.1] [location=join(437131..437635,437775..438913)] [gbkey=CDS] - [JHTR01000032.1_prot_KDB13454.1_5833]	244.704	13.16	1	9	9	30	0.917429	0.950768	1.03066	1.00015	1.14515	1.03961	547	60.9342	6.1001	1.09868	0.156789
UV8b_3138	[locus_tag=UV8b_3138] [protein=histone H1-binding protein] [protein_id=KDB16208.1] [location=complement(join(684380..684715,684834..685182,685245..685474,685622..686230))] [gbkey=CDS] - [JHTR01000012.1_prot_KDB16208.1_3138]	243.435	23.27	1	8	8	17	0.930636	0.952217	0.993133	1.01853	1.11902	1.05328	507	53.8946	4.7417	1.10947	0.0389958
UV8b_5771	[locus_tag=UV8b_5771] [protein=eukaryotic translation initiation factor 2 gamma subunit] [protein_id=KDB13392.1] [location=249604..250554] [gbkey=CDS] - [JHTR01000032.1_prot_KDB13392.1_5771]	242.806	23.1	1	5	5	13	1.02521	1.01128	1.00156	0.986003	0.946884	0.965507	316	33.9873	8.39697	0.95403	0.0244104
UV8b_3708	[locus_tag=UV8b_3708] [protein=putative oxysterol binding protein (Osh3)] [protein_id=KDB15282.1] [location=join(25581..25616,25791..25867,25942..28771)] [gbkey=CDS] - [JHTR01000016.1_prot_KDB15282.1_3708]	242.711	10.92	1	9	9	15	0.990719	0.97668	0.990287	1.03019	1.01206	1.02096	980	107.755	7.53271	1.03568	0.00726897
UV8b_6001	[locus_tag=UV8b_6001] [protein=squalene synthase] [protein_id=KDB13241.1] [location=join(340732..340787,340896..341949,342021..342179,342251..342373)] [gbkey=CDS] - [JHTR01000034.1_prot_KDB13241.1_6001]	242.515	22.46	1	10	10	16	1.08492	1.08029	1.07491	0.900359	0.927306	0.884787	463	53.2881	6.32861	0.837145	0.000160115
UV8b_789	[locus_tag=UV8b_789] [protein=hypothetical protein] [protein_id=KDB18547.1] [location=complement(join(886430..886669,886877..888968,890527..890612))] [gbkey=CDS] - [JHTR01000002.1_prot_KDB18547.1_789]	242.039	17.52	1	13	13	29	0.978028	0.98119	1.00843	1.00129	1.02301	1.01609	805	90.6674	8.5874	1.02451	0.104424
UV8b_4748	[locus_tag=UV8b_4748] [protein=mannosyltransferase PMTI] [protein_id=KDB14477.1] [location=join(412890..413144,413208..414843,414904..415310)] [gbkey=CDS] - [JHTR01000023.1_prot_KDB14477.1_4748]	241.255	18.17	1	17	17	35	1.01567	1.01707	1.03839	0.95405	1.02816	0.968353	765	87.2387	9.21729	0.960741	0.167377
UV8b_2005	[locus_tag=UV8b_2005] [protein=IMP-specific 5'-nucleotidase 1] [protein_id=KDB17408.1] [location=join(891713..891748,891799..892177,892280..892630,892762..893618)] [gbkey=CDS] - [JHTR01000007.1_prot_KDB17408.1_2005]	241.102	12.96	1	5	5	12	1.02809	0.999394	1.00302	1.00803	0.971644	1.00959	540	59.2526	8.41162	0.986386	0.420429
UV8b_4066	[locus_tag=UV8b_4066] [protein=mitochondrial carrier protein] [protein_id=KDB14920.1] [location=complement(join(28058..28371,28570..29040,29219..29493,31323..31363,31484..32214,32423..32786))] [gbkey=CDS] - [JHTR01000019.1_prot_KDB14920.1_4066]	240.702	13	1	7	9	20	0.986259	0.972965	0.897297	1.08206	1.04447	1.05788	731	79.0578	9.33447	1.11479	0.0214548
UV8b_5010	[locus_tag=UV8b_5010] [protein=proteasome component C5] [protein_id=KDB14021.1] [location=join(63196..63299,63366..64053)] [gbkey=CDS] - [JHTR01000026.1_prot_KDB14021.1_5010]	240.369	33.46	1	7	7	19	1.03376	0.994975	1.0412	0.958929	0.975202	0.980182	263	28.8771	6.41748	0.949308	0.0298291
UV8b_4670	[locus_tag=UV8b_4670] [protein=ARP2/3 complex 20 kDa subunit] [protein_id=KDB14399.1] [location=join(194089..194148,194259..194363,194416..194742,194815..194961,195091..195099)] [gbkey=CDS] - [JHTR01000023.1_prot_KDB14399.1_4670]	240.085	25.58	1	4	4	9	0.965508	0.949166	0.922062	1.07345	0.969736	1.03479	215	24.5788	7.63525	1.08504	0.0703555
UV8b_5258	[locus_tag=UV8b_5258] [protein=hypothetical protein] [protein_id=KDB13924.1] [location=join(304288..304588,304735..305237)] [gbkey=CDS] - [JHTR01000028.1_prot_KDB13924.1_5258]	239.963	28.46	1	6	6	17	0.996293	1.03611	1.01896	0.945546	1.02546	0.979874	267	28.9508	8.66064	0.967069	0.264888
UV8b_3238	[locus_tag=UV8b_3238] [protein=putative phospholipase PldA] [protein_id=KDB15926.1] [location=join(359754..359911,359985..360012,360152..362399,362468..362682)] [gbkey=CDS] - [JHTR01000013.1_prot_KDB15926.1_3238]	239.872	23.92	1	18	18	22	1.01344	1.02941	1.01292	0.933393	0.949902	0.979025	882	101.852	6.40479	0.936694	0.0109942
UV8b_7145	[locus_tag=UV8b_7145] [protein=membrane dipeptidase] [protein_id=KDB12002.1] [location=join(57428..57737,57795..58007,58073..58445,58512..59058)] [gbkey=CDS] - [JHTR01000053.1_prot_KDB12002.1_7145]	239.764	22.5	1	11	11	30	0.985751	0.948168	0.891158	1.10772	1.00734	1.05931	480	52.4739	6.52197	1.12364	0.0434868
UV8b_6224	[locus_tag=UV8b_6224] [protein=glucosamine 6-phosphate N-acetyltransferase] [protein_id=KDB12863.1] [location=join(5883..6178,6360..6593,6698..6755)] [gbkey=CDS] - [JHTR01000038.1_prot_KDB12863.1_6224]	239.569	30.77	1	4	4	14	0.952816	0.984777	1.06499	0.972932	1.09008	1.00529	195	22.1049	5.59229	1.02189	0.67373
UV8b_4775	[locus_tag=UV8b_4775] [protein=mRNA splicing protein (Prp39)] [protein_id=KDB14504.1] [location=join(499079..499150,499274..499489,499566..499669,500144..501346,501442..501616)] [gbkey=CDS] - [JHTR01000023.1_prot_KDB14504.1_4775]	239.059	19.02	1	9	9	16	1.00063	0.987319	0.961934	1.03447	1.01649	1.03304	589	68.1815	5.07178	1.04546	0.0246498
UV8b_705	[locus_tag=UV8b_705] [protein=reptin] [protein_id=KDB18463.1] [location=join(615775..615871,615984..616087,616296..616476,616718..616791,616849..617075,617224..618412)] [gbkey=CDS] - [JHTR01000002.1_prot_KDB18463.1_705]	238.792	14.61	1	8	8	15	1.10655	1.01503	0.950197	1.04605	0.910864	0.950112	623	67.6727	5.49072	0.946364	0.415861
UV8b_3914	[locus_tag=UV8b_3914] [protein=putative guanyl-nucleotide exchange factor (Sec7)] [protein_id=KDB15251.1] [location=complement(join(545236..549549,549631..550896))] [gbkey=CDS] - [JHTR01000017.1_prot_KDB15251.1_3914]	238.115	10.65	1	15	15	18	0.962517	0.95083	0.956004	1.04091	1.05785	1.02303	1859	207.079	6.1001	1.08798	0.00136597
UV8b_5650	[locus_tag=UV8b_5650] [protein=F-actin capping protein beta subunit] [protein_id=KDB13552.1] [location=complement(join(291287..291419,291716..292103,292209..292636,292758..292789))] [gbkey=CDS] - [JHTR01000031.1_prot_KDB13552.1_5650]	238.04	14.11	1	3	3	6	0.977373	1.00336	0.934377	1.02608	1.0486	1.0208	326	36.5169	9.27588	1.06187	0.05127
UV8b_7908	[locus_tag=UV8b_7908] [protein=SH3 domain protein] [protein_id=KDB11233.1] [location=complement(join(6322..6492,6621..8386,8477..8551,8617..10498))] [gbkey=CDS] - [JHTR01000076.1_prot_KDB11233.1_7908]	236.587	13.03	1	12	12	16	0.960339	0.987136	0.985421	0.993642	1.07485	1.06212	1297	138.98	4.99561	1.06741	0.0688127
UV8b_190	[locus_tag=UV8b_190] [protein=DNA replication licensing factor mcm5] [protein_id=KDB18799.1] [location=join(622773..622909,622992..623118,623188..624596,624672..625164)] [gbkey=CDS] - [JHTR01000001.1_prot_KDB18799.1_190]	236.418	19.83	1	10	10	12	0.98663	0.998496	0.974786	1.035	0.996916	1.02232	721	80.6774	6.97607	1.03187	0.0746849
UV8b_3936	[locus_tag=UV8b_3936] [protein=sulphydryl oxidase] [protein_id=KDB15273.1] [location=join(617391..617634,617761..618576,618658..618803)] [gbkey=CDS] - [JHTR01000017.1_prot_KDB15273.1_3936]	236.361	21.7	1	6	6	18	0.966316	0.949865	1.06857	0.941657	0.996398	1.03645	401	43.9362	7.60596	0.996566	0.944586
UV8b_7868	[locus_tag=UV8b_7868] [protein=urea active transporter] [protein_id=KDB11258.1] [location=join(29728..31472,31642..31948)] [gbkey=CDS] - [JHTR01000075.1_prot_KDB11258.1_7868]	235.371	9.08	1	4	4	13	0.862793	0.900581	0.889855	1.08297	1.17037	1.11234	683	72.914	8.63135	1.26852	0.00106407
UV8b_6458	[locus_tag=UV8b_6458] [protein=imidazoleglycerol-phosphate dehydratase] [protein_id=KDB12612.1] [location=complement(join(12720..12905,13000..13309,13369..13976,14115..14249))] [gbkey=CDS] - [JHTR01000041.1_prot_KDB12612.1_6458]	235.179	15.29	1	5	5	16	0.917654	1.04356	1.08152	0.949717	1.02572	0.989599	412	42.9212	6.41748	0.974468	0.657559
UV8b_5070	[locus_tag=UV8b_5070] [protein=putative hexokinase HXK2] [protein_id=KDB14081.1] [location=join(274617..274713,274875..274954,275058..276542)] [gbkey=CDS] - [JHTR01000026.1_prot_KDB14081.1_5070]	233.947	13.38	1	6	6	12	0.964591	0.959855	0.951269	1.04981	1.07486	1.07506	553	60.2682	5.89697	1.11267	0.000306805
UV8b_5314	[locus_tag=UV8b_5314] [protein=tetratricopeptide repeat domain containing protein] [protein_id=KDB13980.1] [location=457766..458380] [gbkey=CDS] - [JHTR01000028.1_prot_KDB13980.1_5314]	233.686	15.2	1	3	3	9	0.972735	0.969191	0.996954	0.99545	1.02538	0.958593	204	22.6408	8.14795	1.0138	0.558341
UV8b_4882	[locus_tag=UV8b_4882] [protein=methyltransferase type 11] [protein_id=KDB14287.1] [location=330174..331040] [gbkey=CDS] - [JHTR01000024.1_prot_KDB14287.1_4882]	233.607	32.99	1	8	8	20	0.833824	0.836238	0.845783	1.19348	1.15445	1.18767	288	30.887	6.07471	1.40533	1.15685e-05
UV8b_5191	[locus_tag=UV8b_5191] [protein=putative G2/M phase checkpoint control protein Sum2] [protein_id=KDB13857.1] [location=complement(join(100356..101705,101930..102170,102227..102262,102329..102345))] [gbkey=CDS] - [JHTR01000028.1_prot_KDB13857.1_5191]	233.429	21.76	1	8	8	14	0.962662	0.986956	0.981717	1.01117	1.03053	1.04245	547	56.446	9.93506	1.05213	0.0122222
UV8b_8307	[locus_tag=UV8b_8307] [protein=dolichyl-diphosphooligosaccharide-protein glycotransferase] [protein_id=KDB10836.1] [location=join(1937..2081,2144..2254,2341..3035,3150..3569)] [gbkey=CDS] - [JHTR01000104.1_prot_KDB10836.1_8307]	232.718	15.57	1	6	7	21	0.952606	0.98868	1.10404	0.932603	1.04304	1.00074	456	49.5705	6.80029	0.977363	0.701896
UV8b_6524	[locus_tag=UV8b_6524] [protein=ubiquitin ligase (Nedd4/Rsp5p)] [protein_id=KDB12678.1] [location=join(221725..222017,222115..222137,222235..222273,222344..222449,222535..222668,222737..224816,224901..225000)] [gbkey=CDS] - [JHTR01000041.1_prot_KDB12678.1_6524]	231.718	16.02	1	14	14	26	1.02921	0.999992	0.979133	1.03985	0.935605	0.986093	924	103.246	6.69775	0.984448	0.665012
UV8b_2143	[locus_tag=UV8b_2143] [protein=DNA topoisomerase 2] [protein_id=KDB17051.1] [location=complement(join(463011..464354,464427..464702,464774..468091,468341..468412))] [gbkey=CDS] - [JHTR01000008.1_prot_KDB17051.1_2143]	231.469	7.19	1	9	9	12	1.01066	1.0107	1.01077	1.00502	0.992178	0.991979	1669	186.215	8.04541	0.985835	0.0294456
UV8b_6291	[locus_tag=UV8b_6291] [protein=transcription initiation protein spt5] [protein_id=KDB12930.1] [location=join(276122..276472,276526..278557,278637..278761,278831..278948,279005..279450)] [gbkey=CDS] - [JHTR01000038.1_prot_KDB12930.1_6291]	230.987	6.35	1	5	5	9	0.865709	0.961816	1.15881	0.851059	1.17117	1.01235	1023	111.682	5.09717	1.01616	0.9049
UV8b_3365	[locus_tag=UV8b_3365] [protein=SNARE domain-containing protein] [protein_id=KDB15725.1] [location=join(272787..272839,273199..273341,273431..274219,274333..274595)] [gbkey=CDS] - [JHTR01000014.1_prot_KDB15725.1_3365]	230.859	17.11	1	5	5	12	1.01359	1.00197	0.941683	1.01804	0.996435	1.0378	415	45.3311	8.35303	1.03213	0.27856
UV8b_4071	[locus_tag=UV8b_4071] [protein=C6 transcription factor] [protein_id=KDB14925.1] [location=complement(join(45948..46284,46400..46508,46624..46900,46984..47701,47764..48166,48678..48901,48990..50873,50951..51099))] [gbkey=CDS] - [JHTR01000019.1_prot_KDB14925.1_4071]	230.849	4.47	1	4	4	8	1.02507	1.02861	0.97444	1.03208	0.959101	0.9637	1366	150.211	8.32373	0.975812	0.452626
UV8b_5274	[locus_tag=UV8b_5274] [protein=phospho-2-dehydro-3-deoxyheptonate aldolase] [protein_id=KDB13940.1] [location=join(338169..338214,338469..339248,339319..339626)] [gbkey=CDS] - [JHTR01000028.1_prot_KDB13940.1_5274]	229.82	19.1	1	8	9	21	1.03201	1.04118	1.03132	0.975244	0.92189	0.989927	377	40.4629	7.1958	0.92996	0.0256858
UV8b_6340	[locus_tag=UV8b_6340] [protein=putative 2-nitropropane dioxygenase family oxidoreductase] [protein_id=KDB12846.1] [location=complement(join(252823..253772,253937..253979))] [gbkey=CDS] - [JHTR01000039.1_prot_KDB12846.1_6340]	229.276	11.52	1	3	3	8	1.03449	1.0258	0.908263	1.07218	0.916895	0.970306	330	35.2496	7.47412	0.996912	0.9625
UV8b_2942	[locus_tag=UV8b_2942] [protein=arsenical pump-driving ATPase] [protein_id=KDB16012.1] [location=complement(join(114909..115544,115686..116075))] [gbkey=CDS] - [JHTR01000012.1_prot_KDB16012.1_2942]	229.165	25.22	1	6	6	11	0.992915	1.04536	1.05057	0.913731	0.987978	1.0129	341	37.4709	4.89404	0.943591	0.172531
UV8b_712	[locus_tag=UV8b_712] [protein=cytochrome c oxidase polypeptide VIb] [protein_id=KDB18470.1] [location=join(636593..636647,636823..636935,636999..637062,637118..637152)] [gbkey=CDS] - [JHTR01000002.1_prot_KDB18470.1_712]	228.926	46.59	1	4	4	16	0.94963	0.972772	0.988189	1.01487	1.07774	1.03802	88	10.2579	6.90283	1.0756	0.0270209
UV8b_3240	[locus_tag=UV8b_3240] [protein=putative mitochondrial cytochrome b2] [protein_id=KDB15928.1] [location=join(369127..369189,369251..369433,369529..369810,369902..370969)] [gbkey=CDS] - [JHTR01000013.1_prot_KDB15928.1_3240]	228.713	16.38	1	8	8	12	0.972675	1.01046	1.05642	0.943499	1.05742	0.994459	531	58.3426	6.68311	0.985464	0.736901
UV8b_6862	[locus_tag=UV8b_6862] [protein=guanine deaminase] [protein_id=KDB12263.1] [location=complement(29280..30857)] [gbkey=CDS] - [JHTR01000047.1_prot_KDB12263.1_6862]	228.505	28.38	1	11	11	15	0.981903	0.999785	0.985652	1.00828	1.06459	1.03122	525	56.4562	6.44287	1.04608	0.0572453
UV8b_5183	[locus_tag=UV8b_5183] [protein=Actin-like protein 3] [protein_id=KDB13849.1] [location=join(79407..79606,80227..80249,80304..80531,80592..80638,80770..80856,80928..81761,81840..81905)] [gbkey=CDS] - [JHTR01000028.1_prot_KDB13849.1_5183]	228.349	21.05	1	9	9	18	1.04323	0.992035	0.983082	1.00005	0.971031	0.987747	494	53.9811	6.7124	0.980283	0.38875
UV8b_6113	[locus_tag=UV8b_6113] [protein=mitochondrion protein] [protein_id=KDB13113.1] [location=join(295653..295728,295822..295841,295919..295939,296011..296202,296313..296636,298021..299889)] [gbkey=CDS] - [JHTR01000036.1_prot_KDB13113.1_6113]	228.096	16.69	1	13	13	21	0.98775	0.993249	0.988271	1.0219	1.07089	1.00593	833	91.8518	6.96143	1.04359	0.0927686
UV8b_7807	[locus_tag=UV8b_7807] [protein=nitroreductase family protein] [protein_id=KDB11345.1] [location=complement(join(52369..52689,52777..53088))] [gbkey=CDS] - [JHTR01000073.1_prot_KDB11345.1_7807]	227.896	42.86	1	7	7	23	0.913631	0.923466	1.02583	0.98789	1.0164	1.04841	210	22.9466	6.85889	1.06629	0.188085
UV8b_4323	[locus_tag=UV8b_4323] [protein=hypothetical protein] [protein_id=KDB14800.1] [location=join(230978..231130,231338..231814)] [gbkey=CDS] - [JHTR01000020.1_prot_KDB14800.1_4323]	227.876	16.75	1	2	2	11	0.932878	0.970893	1.08786	0.927799	1.1563	0.943944	209	19.4581	5.35107	1.01217	0.895967
UV8b_3575	[locus_tag=UV8b_3575] [protein=eukaryotic translation initiation factor 2 alpha subunit] [protein_id=KDB15544.1] [location=complement(join(233500..233998,234072..234279,234345..234507,234567..234644))] [gbkey=CDS] - [JHTR01000015.1_prot_KDB15544.1_3575]	227.471	23.17	1	7	7	17	1.02897	1.07497	1.07435	0.988579	0.922651	0.927428	315	35.7275	5.46533	0.89314	0.0123153
UV8b_4898	[locus_tag=UV8b_4898] [protein=40S ribosomal protein S8] [protein_id=KDB14303.1] [location=complement(join(408666..409222,409448..409511))] [gbkey=CDS] - [JHTR01000024.1_prot_KDB14303.1_4898]	227.099	51.94	1	14	14	38	1.039	1.0607	1.09449	0.909527	0.964197	0.938197	206	23.3363	10.6382	0.880326	0.00485579
UV8b_2216	[locus_tag=UV8b_2216] [protein=monothiol glutaredoxin-4] [protein_id=KDB17124.1] [location=join(756372..757067,757147..757224)] [gbkey=CDS] - [JHTR01000008.1_prot_KDB17124.1_2216]	226.73	15.56	1	5	5	12	1.01315	1.04275	1.00404	0.993868	1.00158	0.989817	257	27.5831	4.76709	0.975595	0.110578
UV8b_7147	[locus_tag=UV8b_7147] [protein=peptidyl-prolyl cis-trans isomerase B precursor] [protein_id=KDB12004.1] [location=join(60402..60729,60809..60935,61062..61213,61323..61525)] [gbkey=CDS] - [JHTR01000053.1_prot_KDB12004.1_7147]	226.667	26.77	1	7	7	25	1.05228	1.02834	0.938392	1.01679	0.95109	0.979998	269	29.0811	6.82959	0.976439	0.581039
UV8b_8119	[locus_tag=UV8b_8119] [protein=glycosyl transferase family 17 protein] [protein_id=KDB11055.1] [location=complement(105005..106069)] [gbkey=CDS] - [JHTR01000082.1_prot_KDB11055.1_8119]	226.243	22.6	1	7	7	20	0.913596	0.942963	0.957148	1.05701	1.10905	1.06358	354	40.9054	6.60986	1.14782	0.00262641
UV8b_6484	[locus_tag=UV8b_6484] [protein=protein phosphatase PP2A regulatory subunit B] [protein_id=KDB12638.1] [location=complement(join(99673..100173,100258..100932,101058..101335,101433..101508,102658..103238,103328..103979,104080..104177,104274..104314,104384..104427))] [gbkey=CDS] - [JHTR01000041.1_prot_KDB12638.1_6484]	226.07	10.3	1	10	10	21	0.957583	0.981928	1.02346	0.996275	1.04764	1.02527	981	109.984	6.44287	1.03585	0.219018
UV8b_5731	[locus_tag=UV8b_5731] [protein=ERV25 protein] [protein_id=KDB13352.1] [location=join(111073..111288,111361..111484,111608..111930)] [gbkey=CDS] - [JHTR01000032.1_prot_KDB13352.1_5731]	224.838	19.09	1	4	4	13	1.02322	1.01304	1.02371	0.974318	0.934582	0.964689	220	24.7268	7.54736	0.93909	0.00757066
UV8b_2375	[locus_tag=UV8b_2375] [protein=signal sequence receptor alpha chain] [protein_id=KDB16784.1] [location=join(458007..458063,458376..458836,458958..459243)] [gbkey=CDS] - [JHTR01000009.1_prot_KDB16784.1_2375]	224.763	10.86	1	2	2	13	1.00966	0.968509	1.02895	0.988019	0.984159	0.977776	267	28.6952	8.66064	0.980992	0.35121
UV8b_4242	[locus_tag=UV8b_4242] [protein=acetyltransferase] [protein_id=KDB15096.1] [location=complement(join(561668..562179,562330..562369))] [gbkey=CDS] - [JHTR01000019.1_prot_KDB15096.1_4242]	224.387	39.34	1	4	4	11	0.977625	0.95367	0.928566	1.07772	0.987785	1.05636	183	20.1074	5.64307	1.09161	0.0462196
UV8b_3100	[locus_tag=UV8b_3100] [protein=NADP-dependent leukotriene B4 12-hydroxydehydrogenase] [protein_id=KDB16170.1] [location=join(560274..560454,560567..561076,561212..561576)] [gbkey=CDS] - [JHTR01000012.1_prot_KDB16170.1_3100]	224.36	20.8	1	6	6	14	0.986938	0.981137	0.961335	1.03231	1.0445	1.04051	351	37.8096	8.35303	1.06415	0.00183922
UV8b_1828	[locus_tag=UV8b_1828] [protein=putative D-arabinitol dehydrogenase ArbD] [protein_id=KDB17231.1] [location=join(284630..284999,285073..285142,285223..285531,285688..285804,285903..286083)] [gbkey=CDS] - [JHTR01000007.1_prot_KDB17231.1_1828]	224.247	14.37	1	3	4	9	1.00686	1.06898	1.15472	0.913844	0.955389	0.939564	348	37.2561	8.03076	0.869446	0.0343054
UV8b_5685	[locus_tag=UV8b_5685] [protein=putative serine/threonine kinase] [protein_id=KDB13587.1] [location=join(404003..404706,404778..405278,405554..406027,406095..406395)] [gbkey=CDS] - [JHTR01000031.1_prot_KDB13587.1_5685]	223.603	22.61	1	15	15	26	1.02422	1.0478	1.06523	0.924683	0.987319	0.966205	659	74.8961	8.646	0.917431	0.0169275
UV8b_6774	[locus_tag=UV8b_6774] [protein=UBA/TS-N domain containing protein] [protein_id=KDB12411.1] [location=join(137392..137473,137563..137785,137870..138020,138180..138692)] [gbkey=CDS] - [JHTR01000045.1_prot_KDB12411.1_6774]	223.447	26.4	2	7	7	12	0.977311	1.02408	1.0297	0.966396	1.00515	0.974232	322	35.4862	6.11279	0.971854	0.235547
UV8b_368	[locus_tag=UV8b_368] [protein=negative regulator of the PHO system] [protein_id=KDB18977.1] [location=join(1572050..1572118,1572199..1573110)] [gbkey=CDS] - [JHTR01000001.1_prot_KDB18977.1_368]	223.179	33.13	1	10	10	21	1.0174	1.00315	1.0323	0.967698	1.02705	0.995193	326	37.3591	7.75244	0.979395	0.334005
UV8b_8083	[locus_tag=UV8b_8083] [protein=ubiquitin carboxyl-terminal hydrolase 14] [protein_id=KDB11095.1] [location=complement(join(93922..94066,94148..96261))] [gbkey=CDS] - [JHTR01000081.1_prot_KDB11095.1_8083]	222.872	23.94	1	12	12	17	1.02829	1.02274	1.0057	0.972374	0.974744	1.00179	752	83.2784	5.22412	0.964726	0.0365496
UV8b_3192	[locus_tag=UV8b_3192] [protein=hsp70-like protein] [protein_id=KDB15880.1] [location=complement(join(191726..191925,192064..193435,193594..193698,193843..194451))] [gbkey=CDS] - [JHTR01000013.1_prot_KDB15880.1_3192]	222.773	17.74	1	11	12	22	1.03034	1.02079	0.985096	0.993757	0.968937	0.963683	761	82.823	8.19189	0.96382	0.0920638
UV8b_2055	[locus_tag=UV8b_2055] [protein=putative plasma membrane channel protein (Aqy1)] [protein_id=KDB16963.1] [location=join(183194..183218,183478..184367,184454..184562,184658..185098,185168..185696,185768..185838,186022..186194)] [gbkey=CDS] - [JHTR01000008.1_prot_KDB16963.1_2055]	222.687	16.11	1	9	9	15	1.01994	0.992812	0.946588	1.02199	0.952415	1.00409	745	83.6432	7.50342	1.00647	0.841307
UV8b_5297	[locus_tag=UV8b_5297] [protein=peptidase family M28] [protein_id=KDB13963.1] [location=complement(join(397350..398943,399047..399967,400100..400372,400446..400795))] [gbkey=CDS] - [JHTR01000028.1_prot_KDB13963.1_5297]	222.51	4.78	1	4	4	10	0.942008	0.979591	0.946513	1.07548	1.04108	1.03116	1045	113.049	6.06201	1.09749	0.00649719
UV8b_8008	[locus_tag=UV8b_8008] [protein=hypothetical protein] [protein_id=KDB11146.1] [location=101719..102870] [gbkey=CDS] - [JHTR01000079.1_prot_KDB11146.1_8008]	222.407	12.79	1	3	3	5	0.91958	0.982786	1.00085	1.01322	1.06381	1.02331	383	41.038	8.51416	1.0679	0.0867552
UV8b_1922	[locus_tag=UV8b_1922] [protein=Tyrosyl-tRNA synthetase] [protein_id=KDB17325.1] [location=complement(join(614779..616438,616572..616798))] [gbkey=CDS] - [JHTR01000007.1_prot_KDB17325.1_1922]	222.314	13.06	1	8	8	16	1.0021	1.01528	1.01765	0.992757	0.993718	0.984905	628	71.4774	9.68604	0.97903	0.0191373
UV8b_3784	[locus_tag=UV8b_3784] [protein=ribose-phosphate pyrophosphokinase II] [protein_id=KDB15358.1] [location=complement(join(280130..280192,280262..280335,280390..280525,280606..280923,281006..281306,281560..281639))] [gbkey=CDS] - [JHTR01000016.1_prot_KDB15358.1_3784]	222.04	10.84	1	3	3	10	0.938129	1.00895	1.11108	0.860576	1.11479	1.01702	323	34.828	6.53662	0.978493	0.818434
UV8b_5592	[locus_tag=UV8b_5592] [protein=translation machinery-associated protein 22] [protein_id=KDB13494.1] [location=join(111565..111615,111702..111743,111845..111932,112009..112226,112299..112493)] [gbkey=CDS] - [JHTR01000031.1_prot_KDB13494.1_5592]	221.529	25.38	1	7	7	12	1.01713	1.03404	1.03272	0.930036	0.999201	1.00401	197	21.8944	8.20654	0.951152	0.109808
UV8b_3947	[locus_tag=UV8b_3947] [protein=3-ketoacyl-CoA reductase] [protein_id=KDB15107.1] [location=complement(join(133450..134310,134370..134549))] [gbkey=CDS] - [JHTR01000018.1_prot_KDB15107.1_3947]	221.314	11.56	1	3	3	6	1.05267	1.04433	1.04656	0.902104	0.965638	0.958576	346	38.1474	9.64209	0.899083	0.00642842
UV8b_4553	[locus_tag=UV8b_4553] [protein=translation initiation factor eIF-2B epsilon subunit] [protein_id=KDB14697.1] [location=join(490566..490796,490858..490914,491063..493120)] [gbkey=CDS] - [JHTR01000021.1_prot_KDB14697.1_4553]	221.309	6.4	1	5	5	9	0.949772	0.988292	0.976012	0.960603	1.01426	1.06767	781	84.7891	4.97021	1.04408	0.263341
UV8b_5726	[locus_tag=UV8b_5726] [protein=hydrolase] [protein_id=KDB13347.1] [location=95913..96803] [gbkey=CDS] - [JHTR01000032.1_prot_KDB13347.1_5726]	220.513	23.65	1	5	5	13	0.985762	0.991666	1.00049	1.02171	1.01236	0.985616	296	32.7966	9.05615	1.01403	0.297348
UV8b_4484	[locus_tag=UV8b_4484] [protein=hypothetical protein] [protein_id=KDB14628.1] [location=join(172739..173256,173359..173413,173502..173606)] [gbkey=CDS] - [JHTR01000021.1_prot_KDB14628.1_4484]	219.798	14.22	1	2	2	6	0.973299	0.985015	1.00934	1.02283	1.03775	1.02829	225	23.8555	5.60498	1.04084	0.0244259
UV8b_714	[locus_tag=UV8b_714] [protein=40s ribosomal protein S10b] [protein_id=KDB18472.1] [location=join(638688..638726,638811..639241,639379..639421)] [gbkey=CDS] - [JHTR01000002.1_prot_KDB18472.1_714]	219.327	32.35	1	8	8	35	1.0089	1.06371	1.04634	0.955399	0.929382	0.95719	170	19.2248	9.80322	0.911195	0.00754301
UV8b_7129	[locus_tag=UV8b_7129] [protein=cyclopropane-fatty-acyl-phospholipid synthase] [protein_id=KDB12043.1] [location=complement(join(125439..125630,125701..125809,125896..127019,127079..127183))] [gbkey=CDS] - [JHTR01000052.1_prot_KDB12043.1_7129]	218.81	16.5	1	7	7	16	0.941709	0.972144	1.0117	0.978174	1.1072	1.05484	509	57.5202	7.41553	1.07337	0.168292
UV8b_1886	[locus_tag=UV8b_1886] [protein=cullin] [protein_id=KDB17289.1] [location=join(495621..495714,495794..496785,498270..498540,498625..498691,498768..498844,498944..500835,500963..501151)] [gbkey=CDS] - [JHTR01000007.1_prot_KDB17289.1_1886]	218.62	10.65	1	12	12	17	0.954141	0.97999	1.00401	1.00543	1.07	1.04388	1193	136.484	7.78174	1.06166	0.0630463
UV8b_7902	[locus_tag=UV8b_7902] [protein=Set1 complex component spp1] [protein_id=KDB11292.1] [location=complement(join(127748..129434,129868..130375,130449..131247))] [gbkey=CDS] - [JHTR01000075.1_prot_KDB11292.1_7902]	218.571	6.42	1	4	4	7	0.960616	0.973064	0.942294	1.0293	0.990664	1.04632	997	105.629	5.22412	1.06617	0.027629
UV8b_300	[locus_tag=UV8b_300] [protein=histidinol-phosphate aminotransferase] [protein_id=KDB18909.1] [location=join(1022391..1022701,1022896..1024012)] [gbkey=CDS] - [JHTR01000001.1_prot_KDB18909.1_300]	218.193	15.37	1	5	5	12	1.03338	0.984295	1.00623	0.989454	0.975793	0.981381	475	51.0283	8.45557	0.974445	0.155461
UV8b_6013	[locus_tag=UV8b_6013] [protein=MFS multidrug transporter] [protein_id=KDB13142.1] [location=join(344013..344348,344510..344816,344880..345781)] [gbkey=CDS] - [JHTR01000035.1_prot_KDB13142.1_6013]	218.033	9.53	1	6	6	19	0.932676	0.957611	1.06087	0.983031	1.12139	1.04449	514	55.9661	8.23584	1.06701	0.304821
UV8b_4921	[locus_tag=UV8b_4921] [protein=patched sphingolipid transporter] [protein_id=KDB14326.1] [location=complement(join(457114..460674,460751..461026))] [gbkey=CDS] - [JHTR01000024.1_prot_KDB14326.1_4921]	218.031	7.9	1	9	9	18	0.958738	0.981338	0.9301	1.02968	1.05943	1.05438	1278	140.515	5.80811	1.09522	0.00641576
UV8b_6840	[locus_tag=UV8b_6840] [protein=NADH-ubiquinone oxidoreductase 49 kDa subunit] [protein_id=KDB12353.1] [location=join(223097..223753,223888..224629,224691..224707)] [gbkey=CDS] - [JHTR01000046.1_prot_KDB12353.1_6840]	217.98	16.35	1	5	5	9	0.890699	0.937438	1.10152	0.955506	1.20297	1.02335	471	53.229	6.80029	1.08607	0.437918
UV8b_6151	[locus_tag=UV8b_6151] [protein=amidohydrolase family protein] [protein_id=KDB12949.1] [location=complement(join(61820..62220,62298..62366,62538..63240))] [gbkey=CDS] - [JHTR01000037.1_prot_KDB12949.1_6151]	217.48	8.21	1	3	3	7	1.02846	1.0907	1.08463	0.855908	0.975849	0.946766	390	42.0402	5.94775	0.867262	0.026276
UV8b_7951	[locus_tag=UV8b_7951] [protein=replication factor-A protein 1] [protein_id=KDB11218.1] [location=join(102792..102829,102907..103158,103280..104891)] [gbkey=CDS] - [JHTR01000077.1_prot_KDB11218.1_7951]	217.213	17.85	1	8	8	12	0.9745	0.998879	1.0168	1.01606	1.01683	1.02004	633	70.122	6.55127	1.02098	0.164785
UV8b_6776	[locus_tag=UV8b_6776] [protein=hypothetical protein] [protein_id=KDB12413.1] [location=join(141482..141698,141812..142215,142311..142477,142568..142967,143034..143192)] [gbkey=CDS] - [JHTR01000045.1_prot_KDB12413.1_6776]	217.099	11.61	1	5	5	11	0.887909	0.912843	1.05163	0.968207	1.24431	1.06216	448	51.1295	5.92236	1.14805	0.215358
UV8b_7645	[locus_tag=UV8b_7645] [protein=brefeldin A resistance protein] [protein_id=KDB11500.1] [location=complement(join(73180..74984,75131..77864))] [gbkey=CDS] - [JHTR01000067.1_prot_KDB11500.1_7645]	217.025	7.08	1	9	9	12	0.98294	0.915085	0.93249	1.06187	1.09352	1.05487	1512	168.755	7.63525	1.13416	0.00580395
UV8b_1178	[locus_tag=UV8b_1178] [protein=glyoxylate reductase] [protein_id=KDB17811.1] [location=join(83982..84025,84110..84324,84542..84945,85279..85635)] [gbkey=CDS] - [JHTR01000004.1_prot_KDB17811.1_1178]	216.712	13.57	1	3	3	8	1.03781	1.00413	1.00628	0.996072	0.980341	0.991963	339	36.3457	6.80029	0.973805	0.0882405
UV8b_4847	[locus_tag=UV8b_4847] [protein=GPI-anchored cell wall beta-1,3-endoglucanase EglC] [protein_id=KDB14252.1] [location=212194..213543] [gbkey=CDS] - [JHTR01000024.1_prot_KDB14252.1_4847]	216.569	13.14	1	7	7	23	1.0905	1.08442	1.07648	0.92998	0.912932	0.914451	449	46.0786	5.80811	0.848053	1.71759e-05
UV8b_3073	[locus_tag=UV8b_3073] [protein=putative nitrilase family protein (Nit3)] [protein_id=KDB16143.1] [location=complement(498645..499592)] [gbkey=CDS] - [JHTR01000012.1_prot_KDB16143.1_3073]	216.247	18.1	1	5	5	12	1.08551	1.02012	1.01201	0.98645	0.925638	0.953088	315	33.5482	7.47412	0.91902	0.0447602
UV8b_4124	[locus_tag=UV8b_4124] [protein=Leukotriene A-4 hydrolase] [protein_id=KDB14978.1] [location=complement(join(220019..220474,220522..220916,220993..221099,221183..221318,221404..222217))] [gbkey=CDS] - [JHTR01000019.1_prot_KDB14978.1_4124]	215.665	26.61	1	14	14	31	0.926559	0.990928	0.999033	1.01856	1.08097	1.03199	635	71.1749	6.7417	1.07372	0.0736669
UV8b_2212	[locus_tag=UV8b_2212] [protein=eukaryotic translation initiation factor 3] [protein_id=KDB17120.1] [location=join(742335..742542,742653..743874,744036..744330)] [gbkey=CDS] - [JHTR01000008.1_prot_KDB17120.1_2212]	215.088	15.85	1	8	8	14	1.05628	1.06151	1.0378	0.911538	0.956903	0.943392	574	63.7682	5.18604	0.891067	0.00167941
UV8b_1867	[locus_tag=UV8b_1867] [protein=Serine/threonine-protein phosphatase 2B catalytic subunit] [protein_id=KDB17270.1] [location=complement(join(416565..416673,416866..417773,417874..418463,418595..418760))] [gbkey=CDS] - [JHTR01000007.1_prot_KDB17270.1_1867]	214.585	13.39	1	8	8	17	1.00307	1.0236	1.07371	0.937324	0.988341	0.970115	590	67.0513	6.13818	0.934007	0.0570534
UV8b_1380	[locus_tag=UV8b_1380] [protein=suaprga1-like protein] [protein_id=KDB17496.1] [location=complement(join(44237..44771,44876..45234))] [gbkey=CDS] - [JHTR01000005.1_prot_KDB17496.1_1380]	214.423	27.61	1	4	4	7	0.970875	0.967328	0.866319	1.14624	1.01652	1.01272	297	32.8374	4.4751	1.13227	0.0905515
UV8b_2114	[locus_tag=UV8b_2114] [protein=peptidylprolyl isomerase] [protein_id=KDB17022.1] [location=join(387127..387140,387218..387282,387520..387689,387761..387867,388011..388197)] [gbkey=CDS] - [JHTR01000008.1_prot_KDB17022.1_2114]	213.992	38.33	1	7	7	21	1.03839	1.03113	0.944226	1.0077	0.937333	0.9889	180	19.5888	8.14795	0.973515	0.510186
UV8b_2924	[locus_tag=UV8b_2924] [protein=Cel3b putative secreted beta-glucosidase] [protein_id=KDB16468.1] [location=complement(join(704082..706073,706145..706550,706612..706880))] [gbkey=CDS] - [JHTR01000011.1_prot_KDB16468.1_2924]	213.76	10.36	1	8	8	15	0.986036	1.02855	1.04941	1.02979	0.88413	0.976149	888	95.529	6.32861	0.943237	0.27997
UV8b_1826	[locus_tag=UV8b_1826] [protein=methylcrotonoyl-CoA carboxylase beta chain precursor] [protein_id=KDB17229.1] [location=complement(join(278056..278178,278340..279420,279580..280094))] [gbkey=CDS] - [JHTR01000007.1_prot_KDB17229.1_1826]	213.46	13.99	1	6	6	15	1.00671	1.02054	0.994324	1.01404	0.979352	0.945097	572	60.4891	8.74854	0.972502	0.263266
UV8b_2324	[locus_tag=UV8b_2324] [protein=putative secretory component protein shr3] [protein_id=KDB16733.1] [location=complement(join(264957..265519,265629..265716))] [gbkey=CDS] - [JHTR01000009.1_prot_KDB16733.1_2324]	213.424	17.59	1	3	3	9	0.951257	0.987752	1.08391	0.963016	1.02508	1.00072	216	23.8103	8.07471	0.988716	0.80666
UV8b_317	[locus_tag=UV8b_317] [protein=ATP synthase regulation protein NCA2] [protein_id=KDB18926.1] [location=join(1070876..1070892,1070994..1072998)] [gbkey=CDS] - [JHTR01000001.1_prot_KDB18926.1_317]	213.035	13.37	1	7	7	9	0.9297	1.00565	0.952081	1.05679	1.00105	1.03946	673	76.2323	7.89893	1.07268	0.0663015
UV8b_4563	[locus_tag=UV8b_4563] [protein=putative eukaryotic translation initiation factor subunit eIF2A] [protein_id=KDB14707.1] [location=complement(join(525711..527162,527241..527828))] [gbkey=CDS] - [JHTR01000021.1_prot_KDB14707.1_4563]	212.62	16.94	1	8	8	14	0.977866	1.02767	0.981646	1.00185	1.00862	1.01499	679	73.7404	9.26123	1.01282	0.481247
UV8b_6032	[locus_tag=UV8b_6032] [protein=chorismate synthase] [protein_id=KDB13032.1] [location=join(34814..34860,34932..34998,35113..36076,36135..36229)] [gbkey=CDS] - [JHTR01000036.1_prot_KDB13032.1_6032]	212.286	20.77	1	7	7	12	0.943128	0.985958	0.993474	0.991642	1.11363	1.05088	390	41.4169	7.45947	1.07993	0.113533
UV8b_2957	[locus_tag=UV8b_2957] [protein=cysteine desulfurase precursor] [protein_id=KDB16027.1] [location=join(154212..154467,154545..155368,155614..156036)] [gbkey=CDS] - [JHTR01000012.1_prot_KDB16027.1_2957]	212.242	15	1	6	7	12	0.949859	0.94735	0.922614	1.0709	1.06255	1.06831	500	54.726	7.32764	1.13545	0.000147338
UV8b_5725	[locus_tag=UV8b_5725] [protein=sphingosine-1-phosphate lyase] [protein_id=KDB13346.1] [location=complement(join(92207..93200,93332..93937,94209..94312))] [gbkey=CDS] - [JHTR01000032.1_prot_KDB13346.1_5725]	211.67	17.81	1	9	9	18	0.995007	0.977281	0.975508	1.02205	1.03918	1.00669	567	61.5422	8.74854	1.04075	0.0236602
UV8b_3123	[locus_tag=UV8b_3123] [protein=putative ATP dependent RNA helicase] [protein_id=KDB16193.1] [location=join(634292..635036,635103..635784,635856..636420,636494..636591,636662..638680,638784..638859,638966..639214)] [gbkey=CDS] - [JHTR01000012.1_prot_KDB16193.1_3123]	211.431	8.94	1	11	11	15	1.03181	1.02813	1.01453	0.963669	0.978381	0.970938	1477	164.883	7.73779	0.947476	0.00134429
UV8b_3016	[locus_tag=UV8b_3016] [protein=SNARE domain-containing protein] [protein_id=KDB16086.1] [location=complement(join(311271..311633,311758..312480,312663..312731))] [gbkey=CDS] - [JHTR01000012.1_prot_KDB16086.1_3016]	211.388	13.8	1	4	4	6	0.78651	0.86701	1.15411	0.899156	1.38755	1.08945	384	43.8724	8.80713	1.20249	0.353441
UV8b_5220	[locus_tag=UV8b_5220] [protein=threonine synthase] [protein_id=KDB13886.1] [location=complement(join(184139..185083,185168..185373,185564..185936,186117..186203))] [gbkey=CDS] - [JHTR01000028.1_prot_KDB13886.1_5220]	211.072	13.06	1	5	5	7	0.93149	0.999256	0.994414	0.967107	1.06057	1.07333	536	59.6292	5.73193	1.06012	0.216402
UV8b_6384	[locus_tag=UV8b_6384] [protein=glutaryl-CoA dehydrogenase precursor] [protein_id=KDB12728.1] [location=join(80092..80276,80581..80930,81065..82090,82161..82207)] [gbkey=CDS] - [JHTR01000040.1_prot_KDB12728.1_6384]	210.83	13.46	1	7	7	13	0.980774	1.03466	1.06377	0.94173	1.04576	0.964138	535	58.5591	7.50342	0.958569	0.346337
UV8b_608	[locus_tag=UV8b_608] [protein=60S ribosomal protein L27] [protein_id=KDB18366.1] [location=join(305103..305165,305526..305862,306354..306517)] [gbkey=CDS] - [JHTR01000002.1_prot_KDB18366.1_608]	210.44	39.57	1	9	9	26	1.05929	1.01836	1.03572	0.957332	0.940151	0.934356	187	21.4915	10.228	0.909573	0.0023897
UV8b_3854	[locus_tag=UV8b_3854] [protein=putative lectin family integral membrane protein] [protein_id=KDB15428.1] [location=complement(494373..495497)] [gbkey=CDS] - [JHTR01000016.1_prot_KDB15428.1_3854]	210.417	17.65	1	5	5	13	0.922351	1.00271	1.16027	0.845847	1.08631	1.00763	374	41.4245	8.6167	0.952828	0.651257
UV8b_2433	[locus_tag=UV8b_2433] [protein=putative mitochondrial carrier protein] [protein_id=KDB16842.1] [location=complement(join(632030..632761,632856..634043,634224..634424))] [gbkey=CDS] - [JHTR01000009.1_prot_KDB16842.1_2433]	210.38	16.01	1	7	7	13	0.949168	0.997926	1.05497	0.92685	1.04273	1.02212	706	77.8662	8.83643	0.996546	0.944899
UV8b_856	[locus_tag=UV8b_856] [protein=ubiquinol-cytochrome c reductase complex 17 kd protein] [protein_id=KDB18008.1] [location=join(44955..45044,45177..45405,45537..45650,45791..45855)] [gbkey=CDS] - [JHTR01000003.1_prot_KDB18008.1_856]	209.488	24.85	1	3	3	10	0.965419	0.952847	0.944802	1.03242	1.10907	1.07617	165	18.684	3.97998	1.12385	0.00679409
UV8b_2353	[locus_tag=UV8b_2353] [protein=hypothetical protein] [protein_id=KDB16762.1] [location=381844..383406] [gbkey=CDS] - [JHTR01000009.1_prot_KDB16762.1_2353]	209.436	22.88	1	9	9	16	0.995268	0.987742	0.997507	1.00698	1.02703	1.0285	520	59.026	8.68994	1.02751	0.0222952
UV8b_3096	[locus_tag=UV8b_3096] [protein=putative sulfide quinone reductase] [protein_id=KDB16166.1] [location=551939..553276] [gbkey=CDS] - [JHTR01000012.1_prot_KDB16166.1_3096]	209.322	14.16	1	6	6	14	0.892299	0.946231	1.05576	1.01	1.12819	1.04545	445	48.0086	8.93896	1.09997	0.180253
UV8b_2414	[locus_tag=UV8b_2414] [protein=protein tyrosine phosphatase] [protein_id=KDB16823.1] [location=complement(join(576744..577224,577317..577990,578060..578138,578231..578415,578515..579186))] [gbkey=CDS] - [JHTR01000009.1_prot_KDB16823.1_2414]	208.916	12.93	1	8	8	19	0.95452	0.955661	0.951302	1.04505	1.05849	1.05908	696	75.8943	7.31299	1.10524	2.99767e-05
UV8b_7327	[locus_tag=UV8b_7327] [protein=ArfGAP family protein] [protein_id=KDB11814.1] [location=join(104007..104078,104158..104293,104360..104543,104609..105318,105425..105762)] [gbkey=CDS] - [JHTR01000058.1_prot_KDB11814.1_7327]	208.718	23.8	2	12	12	24	1.05617	1.03764	0.997435	0.989435	0.922782	0.965309	479	51.1937	8.73389	0.930863	0.0523578
UV8b_6796	[locus_tag=UV8b_6796] [protein=peroxisomal dehydratase] [protein_id=KDB12309.1] [location=complement(join(31377..32140,32229..32277,32360..32479))] [gbkey=CDS] - [JHTR01000046.1_prot_KDB12309.1_6796]	208.708	28.39	2	7	7	15	0.975647	1.02804	1.03375	0.982763	1.03926	0.977795	310	33.9475	8.76318	0.987614	0.666756
UV8b_4995	[locus_tag=UV8b_4995] [protein=putative peroxisomal targeting signal receptor] [protein_id=KDB14006.1] [location=complement(join(14345..14548,15382..17154,17256..17426))] [gbkey=CDS] - [JHTR01000026.1_prot_KDB14006.1_4995]	207.884	7.83	1	6	6	8	0.966358	1.02161	0.990742	0.998099	1.04997	1.01915	715	79.3467	5.13525	1.02972	0.250288
UV8b_6984	[locus_tag=UV8b_6984] [protein=Amino-acid permease inda1] [protein_id=KDB12160.1] [location=join(81510..81800,81908..81965,82076..83196,83288..83548)] [gbkey=CDS] - [JHTR01000049.1_prot_KDB12160.1_6984]	207.704	14.93	1	8	8	15	0.840619	0.857316	0.857009	1.14082	1.14735	1.16908	576	62.9947	8.92432	1.35316	7.78054e-06
UV8b_2724	[locus_tag=UV8b_2724] [protein=Golgi membrane protein (Coy1)] [protein_id=KDB16268.1] [location=join(135376..135493,135568..135735,135815..137721)] [gbkey=CDS] - [JHTR01000011.1_prot_KDB16268.1_2724]	207.559	18.22	1	11	11	16	0.966612	0.983182	1.02717	1.01087	1.06881	1.02989	730	80.8347	5.8335	1.04454	0.14982
UV8b_7929	[locus_tag=UV8b_7929] [protein=SNARE docking complex subunit] [protein_id=KDB11196.1] [location=join(37369..37408,37483..37685,37837..38152,38210..39050,39106..39733)] [gbkey=CDS] - [JHTR01000077.1_prot_KDB11196.1_7929]	207.356	20.44	1	10	10	13	1.00928	0.999705	0.986365	1.0205	0.975343	0.991958	675	74.1247	5.69385	0.997481	0.873044
UV8b_6855	[locus_tag=UV8b_6855] [protein=putative ATP binding protein] [protein_id=KDB12256.1] [location=complement(join(2868..3970,4073..4142))] [gbkey=CDS] - [JHTR01000047.1_prot_KDB12256.1_6855]	207.232	13.59	1	4	4	12	0.991006	1.02893	0.980964	0.975628	0.972519	1.00743	390	43.2211	4.99561	0.984898	0.45725
UV8b_3239	[locus_tag=UV8b_3239] [protein=vacuolar protein-sorting protein BRO1] [protein_id=KDB15927.1] [location=join(364835..365112,365202..365610,365682..366914,367035..368240)] [gbkey=CDS] - [JHTR01000013.1_prot_KDB15927.1_3239]	207.055	14.12	1	13	13	20	1.01823	0.984439	0.961563	1.04929	0.998617	1.00103	1041	117.092	6.771	1.02857	0.292487
UV8b_4937	[locus_tag=UV8b_4937] [protein=NADH-ubiquinone oxidoreductase-like protein] [protein_id=KDB14342.1] [location=complement(join(503921..504429,504496..504844))] [gbkey=CDS] - [JHTR01000024.1_prot_KDB14342.1_4937]	207.047	25.26	1	8	8	18	0.979766	0.996256	0.991185	0.997469	1.01161	0.999414	285	32.5716	9.1001	1.01392	0.104857
UV8b_5017	[locus_tag=UV8b_5017] [protein=vacuolar ATP synthase subunit H] [protein_id=KDB14028.1] [location=join(93168..93465,93681..94209,94289..94904)] [gbkey=CDS] - [JHTR01000026.1_prot_KDB14028.1_5017]	206.781	17.92	1	8	8	18	0.948571	0.96749	1.00867	1.0064	1.05959	1.06421	480	53.565	5.57959	1.07025	0.0559033
UV8b_7437	[locus_tag=UV8b_7437] [protein=developmentally regulated GTP-binding protein 1] [protein_id=KDB11728.1] [location=join(107517..107537,107635..107655,107811..108093,108177..108567,108707..108953,109045..109165,109467..109486)] [gbkey=CDS] - [JHTR01000061.1_prot_KDB11728.1_7437]	206.74	20.71	1	6	6	8	0.965357	1.00876	0.987341	0.979123	1.08168	0.992763	367	40.3451	8.04541	1.0311	0.423892
UV8b_7928	[locus_tag=UV8b_7928] [protein=zinc finger protein] [protein_id=KDB11195.1] [location=complement(join(30056..32881,32948..33039,33101..33349,33418..34651))] [gbkey=CDS] - [JHTR01000077.1_prot_KDB11195.1_7928]	206.526	7.3	1	9	9	14	0.992304	0.971423	0.970434	1.06638	1.01863	1.02464	1466	161.027	7.92822	1.05981	0.0244745
UV8b_6141	[locus_tag=UV8b_6141] [protein=glycosyl transferase family protein] [protein_id=KDB12939.1] [location=complement(23190..23750)] [gbkey=CDS] - [JHTR01000037.1_prot_KDB12939.1_6141]	206.259	27.42	1	4	4	8	0.864863	0.899798	0.930762	1.0376	1.24501	1.10695	186	20.215	7.53271	1.25752	0.0222953
UV8b_2304	[locus_tag=UV8b_2304] [protein=putative ribosomal protein L6.e.B, cytosolic] [protein_id=KDB16713.1] [location=join(207649..207762,208203..208538,208630..208782)] [gbkey=CDS] - [JHTR01000009.1_prot_KDB16713.1_2304]	205.222	38	1	10	10	36	1.04273	1.06639	1.08002	0.930242	0.937604	0.89549	200	22.2062	10.1401	0.866482	0.00111257
UV8b_1175	[locus_tag=UV8b_1175] [protein=UBA/TS-N domain-containing protein] [protein_id=KDB17808.1] [location=join(77820..80510,80602..80703)] [gbkey=CDS] - [JHTR01000004.1_prot_KDB17808.1_1175]	204.835	10.22	1	7	7	12	0.955992	0.959826	1.01534	1.004	1.05154	1.02992	930	99.7834	9.08545	1.05264	0.0947453
UV8b_7723	[locus_tag=UV8b_7723] [protein=putative thiamine biosynthetic bifunctional enzyme] [protein_id=KDB11410.1] [location=complement(join(50397..51012,51188..51399,51543..51861,51977..52112,52172..52457))] [gbkey=CDS] - [JHTR01000071.1_prot_KDB11410.1_7723]	204.007	17.05	1	6	6	15	0.989457	0.984893	0.940523	1.0429	1.00362	1.01398	522	53.6817	6.80029	1.04996	0.067887
UV8b_202	[locus_tag=UV8b_202] [protein=COPII coat assembly protein SEC16] [protein_id=KDB18811.1] [location=complement(join(647600..648195,648261..653616))] [gbkey=CDS] - [JHTR01000001.1_prot_KDB18811.1_202]	203.984	7.61	1	12	12	16	0.974163	0.981884	0.968943	1.04054	1.00036	1.03569	1983	211.473	5.59229	1.05183	0.018691
UV8b_7498	[locus_tag=UV8b_7498] [protein=kinesin] [protein_id=KDB11641.1] [location=join(80127..80289,80404..80727,80829..85597)] [gbkey=CDS] - [JHTR01000063.1_prot_KDB11641.1_7498]	203.775	11.08	1	15	15	20	1.0163	0.974225	0.935333	1.06478	0.985279	1.03683	1751	195.136	5.36377	1.05504	0.179121
UV8b_7738	[locus_tag=UV8b_7738] [protein=hypothetical protein] [protein_id=KDB11425.1] [location=complement(join(103855..103987,104148..104371,104504..105106,105352..105396))] [gbkey=CDS] - [JHTR01000071.1_prot_KDB11425.1_7738]	203.739	27.54	1	8	8	16	1.02255	1.01837	1.00586	1.00499	0.958701	0.977394	334	36.6398	7.66455	0.96531	0.0700602
UV8b_2791	[locus_tag=UV8b_2791] [protein=guanine nucleotide exchange factor-like protein] [protein_id=KDB16335.1] [location=join(318186..318323,318484..320142)] [gbkey=CDS] - [JHTR01000011.1_prot_KDB16335.1_2791]	203.36	21.74	1	10	10	19	1.00273	1.00001	1.01605	1.03195	1.00212	0.982826	598	62.9499	9.40771	0.999372	0.968696
UV8b_7477	[locus_tag=UV8b_7477] [protein=hypothetical protein] [protein_id=KDB11691.1] [location=complement(52252..52629)] [gbkey=CDS] - [JHTR01000062.1_prot_KDB11691.1_7477]	203.274	24.8	1	2	2	7	0.941311	1.01509	0.942197	1.02414	1.03831	1.06004	125	13.2947	4.90674	1.07724	0.0484427
UV8b_5129	[locus_tag=UV8b_5129] [protein=6-phosphofructokinase] [protein_id=KDB14140.1] [location=join(454832..456016,456119..457288)] [gbkey=CDS] - [JHTR01000026.1_prot_KDB14140.1_5129]	203.111	17.09	1	12	12	18	0.988636	0.996465	0.973373	1.04592	0.989179	1.01136	784	85.7145	6.72705	1.02974	0.17568
UV8b_3932	[locus_tag=UV8b_3932] [protein=panthotenate synthetase] [protein_id=KDB15269.1] [location=complement(603893..605065)] [gbkey=CDS] - [JHTR01000017.1_prot_KDB15269.1_3932]	203.046	18.46	1	4	4	7	0.996311	0.979855	0.965082	1.0597	0.979876	1.03826	390	41.0186	8.71924	1.04644	0.148729
UV8b_5122	[locus_tag=UV8b_5122] [protein=synaptobrevin] [protein_id=KDB14133.1] [location=complement(join(431800..431816,431902..432133,432280..432381))] [gbkey=CDS] - [JHTR01000026.1_prot_KDB14133.1_5122]	202.86	30.17	1	2	2	6	1.06624	1.02028	0.938758	1.04015	0.919425	1.02833	116	12.9487	9.70068	0.987648	0.827429
UV8b_5605	[locus_tag=UV8b_5605] [protein=methyltransferase] [protein_id=KDB13507.1] [location=143535..144587] [gbkey=CDS] - [JHTR01000031.1_prot_KDB13507.1_5605]	202.833	17.14	1	6	6	14	0.681231	0.69881	0.769147	1.14049	1.45251	1.33833	350	38.7424	5.75732	1.82922	0.00333764
UV8b_1489	[locus_tag=UV8b_1489] [protein=choline oxidase (CodA)] [protein_id=KDB17605.1] [location=401462..403099] [gbkey=CDS] - [JHTR01000005.1_prot_KDB17605.1_1489]	202.641	15.6	1	7	7	16	1.04782	1.01981	1.01516	1.00078	0.941317	0.986076	545	59.9014	6.68311	0.949846	0.0665173
UV8b_4531	[locus_tag=UV8b_4531] [protein=putative eukaryotic translation initiation factor 3 subunit EifCk] [protein_id=KDB14675.1] [location=338760..339233] [gbkey=CDS] - [JHTR01000021.1_prot_KDB14675.1_4531]	202.443	28.03	1	3	3	8	0.941603	0.980492	1.0115	0.995499	1.09983	1.03716	157	17.4549	4.89404	1.0678	0.143033
UV8b_2800	[locus_tag=UV8b_2800] [protein=tRNA exportin] [protein_id=KDB16344.1] [location=join(362341..362352,362573..364112,364238..365754)] [gbkey=CDS] - [JHTR01000011.1_prot_KDB16344.1_2800]	202.21	6.26	1	6	6	13	1.08584	1.04311	0.926996	1.03482	0.935187	0.950389	1022	114.03	5.08447	0.955644	0.469982
UV8b_7866	[locus_tag=UV8b_7866] [protein=hypothetical protein] [protein_id=KDB11256.1] [location=complement(join(22965..23029,23135..23204,23296..23322,23390..23424,23516..23549,23621..23643,23722..23767))] [gbkey=CDS] - [JHTR01000075.1_prot_KDB11256.1_7866]	202.172	48.48	1	4	4	20	0.946606	0.932904	0.960761	1.05263	1.05573	1.07821	99	11.5337	6.78564	1.12192	0.000532888
UV8b_7671	[locus_tag=UV8b_7671] [protein=putative 40S ribosomal protein] [protein_id=KDB11526.1] [location=join(156646..156668,156764..156891,157047..157191,157325..157424)] [gbkey=CDS] - [JHTR01000067.1_prot_KDB11526.1_7671]	202.146	41.22	1	6	6	12	1.00554	0.990604	1.16246	0.883632	0.969951	0.944099	131	14.8639	10.4917	0.885733	0.118189
UV8b_3710	[locus_tag=UV8b_3710] [protein=enoyl-CoA hydratase/isomerase family protein] [protein_id=KDB15284.1] [location=join(32824..33187,33341..33834)] [gbkey=CDS] - [JHTR01000016.1_prot_KDB15284.1_3710]	201.538	12.28	2	4	4	9	0.999394	0.996646	0.99189	0.986329	0.981157	0.985917	285	30.2335	7.72314	0.988445	0.013853
UV8b_5962	[locus_tag=UV8b_5962] [protein=40S ribosomal protein S21 (CRP7)] [protein_id=KDB13202.1] [location=complement(join(238628..238859,238946..238977))] [gbkey=CDS] - [JHTR01000034.1_prot_KDB13202.1_5962]	201.353	41.38	1	4	4	16	1.02152	1.00082	1.13016	0.956313	1.01636	0.932976	87	9.63689	8.00146	0.921695	0.15606
UV8b_7941	[locus_tag=UV8b_7941] [protein=M protein repeat protein] [protein_id=KDB11208.1] [location=join(80360..80416,80475..80948,81014..82114)] [gbkey=CDS] - [JHTR01000077.1_prot_KDB11208.1_7941]	201.329	21.55	1	11	12	19	0.966859	0.983217	0.988797	0.99034	1.06624	0.98823	543	60.8041	5.69385	1.03605	0.253373
UV8b_365	[locus_tag=UV8b_365] [protein=putative alpha/beta hydrolase] [protein_id=KDB18974.1] [location=join(1564769..1564834,1564905..1565768)] [gbkey=CDS] - [JHTR01000001.1_prot_KDB18974.1_365]	201.232	26.86	1	8	8	16	1.00783	0.981504	0.940483	1.06496	1.01893	1.02697	309	33.7741	7.1665	1.06179	0.0671807
UV8b_5234	[locus_tag=UV8b_5234] [protein=nucleolar protein NOP58-like protein] [protein_id=KDB13900.1] [location=complement(join(227832..229521,229624..229713,229804..229838))] [gbkey=CDS] - [JHTR01000028.1_prot_KDB13900.1_5234]	201.039	21.85	1	13	13	31	1.02481	1.00285	0.989899	0.98831	0.998316	1.01095	604	66.455	8.60205	0.993378	0.611644
UV8b_997	[locus_tag=UV8b_997] [protein=allantoinase] [protein_id=KDB18149.1] [location=complement(join(518512..519555,519639..520151))] [gbkey=CDS] - [JHTR01000003.1_prot_KDB18149.1_997]	200.402	20.46	1	5	5	8	0.990585	0.999931	0.978993	1.01368	0.973881	1.01171	518	54.7376	6.43018	1.01002	0.525894
UV8b_5803	[locus_tag=UV8b_5803] [protein=topoisomerase I] [protein_id=KDB13424.1] [location=complement(join(347734..347874,347942..348391,348495..348746,348852..350477,350621..350761))] [gbkey=CDS] - [JHTR01000032.1_prot_KDB13424.1_5803]	200.337	14.61	1	10	10	12	0.990562	1.01613	1.00534	0.980685	1.07236	0.997211	869	98.484	9.27588	1.01269	0.6848
UV8b_6178	[locus_tag=UV8b_6178] [protein=golgi matrix protein] [protein_id=KDB12976.1] [location=complement(join(134744..135149,135259..136313,136444..137067,137131..137235))] [gbkey=CDS] - [JHTR01000037.1_prot_KDB12976.1_6178]	200.301	13.17	1	7	7	10	0.920732	0.975143	1.03449	0.998138	1.07772	1.02937	729	79.8111	5.59229	1.05967	0.220578
UV8b_2815	[locus_tag=UV8b_2815] [protein=putative chromosome segregation protein SudA] [protein_id=KDB16359.1] [location=complement(join(415116..415717,415820..416255,416339..419165,419222..419259))] [gbkey=CDS] - [JHTR01000011.1_prot_KDB16359.1_2815]	199.914	12.23	1	14	14	19	0.944247	0.964569	0.97866	1.03744	1.09924	1.0452	1300	146.607	6.41748	1.10196	0.010897
UV8b_2598	[locus_tag=UV8b_2598] [protein=guanine nucleotide exchange factor synembryn-like protein] [protein_id=KDB16563.1] [location=complement(join(282104..282209,282273..283393,283447..283523,283581..283655,283732..283768))] [gbkey=CDS] - [JHTR01000010.1_prot_KDB16563.1_2598]	199.801	11.46	1	5	5	11	1.05267	0.989921	1.04849	0.995798	0.993298	0.995071	471	52.4268	5.21143	0.965413	0.153534
UV8b_2778	[locus_tag=UV8b_2778] [protein=Preprotein translocase subunit] [protein_id=KDB16322.1] [location=complement(join(277189..277340,277445..279047,279196..279504,279702..279731))] [gbkey=CDS] - [JHTR01000011.1_prot_KDB16322.1_2778]	199.767	21.09	1	13	13	23	0.999028	1.00738	1.00577	0.943757	1.00497	0.967775	697	77.2384	5.45264	0.968236	0.150955
UV8b_8233	[locus_tag=UV8b_8233] [protein=putative casein kinase] [protein_id=KDB10939.1] [location=join(73506..73634,73721..73790,73906..75107)] [gbkey=CDS] - [JHTR01000092.1_prot_KDB10939.1_8233]	199.742	23.82	1	9	9	21	0.98628	1.00141	1.00912	0.990292	0.996355	1.01632	466	52.0332	9.43701	1.00206	0.852086
UV8b_7420	[locus_tag=UV8b_7420] [protein=midasin] [protein_id=KDB11711.1] [location=complement(join(49246..49750,49845..49898,50070..50573,51244..66080))] [gbkey=CDS] - [JHTR01000061.1_prot_KDB11711.1_7420]	199.368	2	1	6	6	11	1.03147	1.00073	1.0042	0.9947	0.936276	0.995073	5299	590.823	5.33838	0.963656	0.167123
UV8b_7463	[locus_tag=UV8b_7463] [protein=hypothetical protein] [protein_id=KDB11677.1] [location=join(11540..11588,11648..11688,12040..12711)] [gbkey=CDS] - [JHTR01000062.1_prot_KDB11677.1_7463]	198.809	11.46	1	2	2	9	0.969605	0.971462	1.02736	1.01668	1.05452	0.996127	253	28.0914	5.99854	1.03332	0.266114
UV8b_5162	[locus_tag=UV8b_5162] [protein=putative proteasome activator subunit 4] [protein_id=KDB13828.1] [location=join(18003..18466,18588..23943,24188..24250)] [gbkey=CDS] - [JHTR01000028.1_prot_KDB13828.1_5162]	198.249	7.91	1	14	14	23	1.01241	1.00659	1.02317	0.965369	1.00361	0.97208	1960	221.752	6.68311	0.966765	0.0574054
UV8b_4150	[locus_tag=UV8b_4150] [protein=ribose 5-phosphate isomerase A] [protein_id=KDB15004.1] [location=complement(join(295438..295518,295636..296072,296183..296558,296617..296664))] [gbkey=CDS] - [JHTR01000019.1_prot_KDB15004.1_4150]	198.035	20.45	1	5	5	10	0.971737	0.976617	1.05489	0.993427	1.02337	0.959826	313	32.4711	7.29834	0.991137	0.798968
UV8b_6841	[locus_tag=UV8b_6841] [protein=ubiquinone biosynthesis monooxygenase COQ6] [protein_id=KDB12354.1] [location=complement(join(225170..226464,226566..226737))] [gbkey=CDS] - [JHTR01000046.1_prot_KDB12354.1_6841]	197.197	17.62	1	4	4	8	0.993626	0.9611	1.00037	0.985536	1.09888	1.00016	488	52.662	7.62061	1.04381	0.315052
UV8b_3064	[locus_tag=UV8b_3064] [protein=glutamate-cysteine ligase catalytic subunit] [protein_id=KDB16134.1] [location=join(462426..462436,462511..462583,462654..462719,462848..463002,463074..463782,463940..465133)] [gbkey=CDS] - [JHTR01000012.1_prot_KDB16134.1_3064]	197.171	17.69	1	11	11	17	1.04547	1.00842	0.985261	1.03029	0.906499	0.989665	735	81.8311	5.40186	0.962918	0.405433
UV8b_5596	[locus_tag=UV8b_5596] [protein=RNA polymerase Rpb4 family protein] [protein_id=KDB13498.1] [location=join(117052..117233,117319..117446,117545..117666)] [gbkey=CDS] - [JHTR01000031.1_prot_KDB13498.1_5596]	196.837	10.49	1	1	1	9	0.992703	0.889829	0.867958	1.11262	1.10338	1.14723	143	16.1262	5.23682	1.22277	0.0073989
UV8b_328	[locus_tag=UV8b_328] [protein=putative gamma interferon inducible lysosomal thiol reductase (GILT)] [protein_id=KDB18937.1] [location=complement(join(1100845..1100865,1101002..1101284,1101348..1101427,1101574..1102017))] [gbkey=CDS] - [JHTR01000001.1_prot_KDB18937.1_328]	196.828	10.91	1	3	3	8	0.962049	0.960889	0.995645	1.01566	1.05712	1.046	275	30.8187	8.80713	1.0686	0.0166187
UV8b_8224	[locus_tag=UV8b_8224] [protein=eukaryotic translation initiation factor 3 subunit F] [protein_id=KDB10930.1] [location=join(44504..44614,44790..45773)] [gbkey=CDS] - [JHTR01000092.1_prot_KDB10930.1_8224]	196.381	20.33	1	6	6	15	1.01642	1.01354	0.994963	0.981403	0.984172	0.979416	364	39.7698	4.98291	0.973578	0.0178095
UV8b_8398	[locus_tag=UV8b_8398] [protein=chitin biosynthesis protein CHS5] [protein_id=KDB10755.1] [location=5016..5900] [gbkey=CDS] - [JHTR01000231.1_prot_KDB10755.1_8398]	196.304	23.81	1	5	5	13	0.939118	0.9491	1.0153	0.952801	1.11366	1.06274	294	31.2261	4.83057	1.07773	0.229854
UV8b_4509	[locus_tag=UV8b_4509] [protein=hypothetical protein] [protein_id=KDB14653.1] [location=join(249273..249300,249477..249838)] [gbkey=CDS] - [JHTR01000021.1_prot_KDB14653.1_4509]	196.282	38.76	1	4	4	13	1.06813	1.07228	1.11589	0.91845	0.947019	0.905862	129	13.7389	9.33447	0.851065	0.00116349
UV8b_5879	[locus_tag=UV8b_5879] [protein=kinesin] [protein_id=KDB13289.1] [location=complement(join(198709..198949,199048..201500,201829..201945))] [gbkey=CDS] - [JHTR01000033.1_prot_KDB13289.1_5879]	196.138	13.03	1	9	9	17	0.989713	1.00659	0.968321	1.0182	1.01884	1.01636	936	103.282	5.87158	1.02994	0.0560259
UV8b_3406	[locus_tag=UV8b_3406] [protein=serine/threonine-protein kinase SRPK2] [protein_id=KDB15766.1] [location=join(396634..396836,399554..400338,400537..400606,400666..400924,401005..401445)] [gbkey=CDS] - [JHTR01000014.1_prot_KDB15766.1_3406]	196.114	25.13	2	12	12	18	1.01231	0.987431	0.966991	1.04169	1.01451	1.00487	585	64.619	7.34229	1.0318	0.140177
UV8b_3171	[locus_tag=UV8b_3171] [protein=UPF0041 domain protein] [protein_id=KDB15859.1] [location=complement(join(143221..143371,143438..143574,143751..143766,143826..144043))] [gbkey=CDS] - [JHTR01000013.1_prot_KDB15859.1_3171]	196.058	26.59	1	5	5	14	0.966623	0.986916	0.958994	1.02713	1.00838	1.06222	173	19.5344	10.5649	1.06358	0.0258247
UV8b_4769	[locus_tag=UV8b_4769] [protein=60S ribosomal protein L36] [protein_id=KDB14498.1] [location=complement(join(478121..478198,478269..478350,478607..478707,478851..478907))] [gbkey=CDS] - [JHTR01000023.1_prot_KDB14498.1_4769]	195.637	40.95	2	7	7	24	1.01993	1.04858	1.06699	0.902765	0.928561	0.949955	105	11.8508	11.6196	0.887032	0.00363473
UV8b_3764	[locus_tag=UV8b_3764] [protein=protein kinase-like protein] [protein_id=KDB15338.1] [location=join(216919..217109,217825..218038,218091..219191,219398..220025,220119..222136)] [gbkey=CDS] - [JHTR01000016.1_prot_KDB15338.1_3764]	195.363	10.27	1	13	13	18	0.967113	0.993607	1.0362	0.954728	1.05123	0.996719	1383	152.009	9.93506	1.00192	0.958257
UV8b_3317	[locus_tag=UV8b_3317] [protein=putative RNA-binding protein (Nab3)] [protein_id=KDB15677.1] [location=join(91166..92570,92667..92846,92927..94125)] [gbkey=CDS] - [JHTR01000014.1_prot_KDB15677.1_3317]	195.047	3.99	1	4	4	11	0.942955	1.00358	1.05236	1.01222	1.05382	1.00583	927	96.9101	5.93506	1.02433	0.525751
UV8b_5789	[locus_tag=UV8b_5789] [protein=putative oxysterol binding protein] [protein_id=KDB13410.1] [location=complement(join(288673..288952,289018..289319,289382..289631,289686..290144,290267..290372,290544..290658))] [gbkey=CDS] - [JHTR01000032.1_prot_KDB13410.1_5789]	194.604	22.66	1	10	10	20	0.990598	1.01846	1.03512	0.961692	1.03078	0.989719	503	56.5216	6.49365	0.979636	0.436017
UV8b_5675	[locus_tag=UV8b_5675] [protein=20S proteasome subunit] [protein_id=KDB13577.1] [location=join(367647..367676,367745..367892,368124..368731)] [gbkey=CDS] - [JHTR01000031.1_prot_KDB13577.1_5675]	194.45	22.99	1	4	4	7	0.947593	1.00049	1.1248	0.941506	1.01745	1.04907	261	28.8675	7.13721	0.978892	0.742735
UV8b_352	[locus_tag=UV8b_352] [protein=putative SMC1 protein] [protein_id=KDB18961.1] [location=join(1495602..1498541,1498621..1499298,1499366..1499383)] [gbkey=CDS] - [JHTR01000001.1_prot_KDB18961.1_352]	194.404	8.01	1	8	8	12	0.947278	0.989464	1.00461	1.0153	1.06184	1.02592	1211	138.835	5.64307	1.05498	0.0720683
UV8b_394	[locus_tag=UV8b_394] [protein=TIA1 cytotoxic granule-associated RNA binding protein] [protein_id=KDB19003.1] [location=join(1640206..1640565,1640688..1640783,1640873..1641520,1641595..1641715,1641801..1642003)] [gbkey=CDS] - [JHTR01000001.1_prot_KDB19003.1_394]	194.388	9.68	1	5	5	9	0.926799	1.02001	1.09934	0.904677	1.04646	0.987472	475	51.1412	7.04932	0.964698	0.608704
UV8b_8353	[locus_tag=UV8b_8353] [protein=Eukaryotic translation initiation factor 3 subunit M] [protein_id=KDB10801.1] [location=21516..22835] [gbkey=CDS] - [JHTR01000121.1_prot_KDB10801.1_8353]	193.734	17.31	1	8	9	27	1.02265	1.04062	0.993745	0.988216	0.942437	0.975973	439	49.5195	5.36377	0.950805	0.0604743
UV8b_561	[locus_tag=UV8b_561] [protein=hypothetical protein] [protein_id=KDB18319.1] [location=complement(183032..185620)] [gbkey=CDS] - [JHTR01000002.1_prot_KDB18319.1_561]	193.037	15.89	1	9	9	13	0.986387	0.989272	1.02026	1.00763	1.00657	0.972279	862	98.3961	8.93896	0.99685	0.852696
UV8b_1345	[locus_tag=UV8b_1345] [protein=ubiquitin carboxyl-terminal hydrolase] [protein_id=KDB17978.1] [location=join(661024..661771,661842..662007,662096..662347,662483..664814,664886..665845,665903..666012,666129..666283,666341..666919,666985..667036,667096..669305,669380..669436,669494..669579)] [gbkey=CDS] - [JHTR01000004.1_prot_KDB17978.1_1345]	192.625	2.41	1	5	5	8	1.04049	0.98108	0.856751	1.10119	0.872459	1.0007	2568	287.51	5.5542	1.03336	0.727158
UV8b_871	[locus_tag=UV8b_871] [protein=3-ketoacyl-CoA thiolase] [protein_id=KDB18023.1] [location=join(93789..93795,93875..93966,94113..94474,94705..95503)] [gbkey=CDS] - [JHTR01000003.1_prot_KDB18023.1_871]	192.614	18.14	1	5	5	11	1.00203	1.00882	1.04423	0.97207	1.00424	1.00121	419	43.5993	6.771	0.974611	0.194843
UV8b_517	[locus_tag=UV8b_517] [protein=intermembrane space AAA protease IAP-1] [protein_id=KDB19126.1] [location=complement(join(2213491..2213931,2214009..2215778))] [gbkey=CDS] - [JHTR01000001.1_prot_KDB19126.1_517]	192.327	8.02	1	5	5	6	0.953866	0.980788	1.01042	0.998954	1.08471	1.02701	736	80.0466	9.49561	1.05623	0.140264
UV8b_639	[locus_tag=UV8b_639] [protein=ribonucleoside-diphosphate reductase large chain] [protein_id=KDB18397.1] [location=complement(join(440245..440288,440359..442831,442927..443084,443161..443179))] [gbkey=CDS] - [JHTR01000002.1_prot_KDB18397.1_639]	192.111	13.38	1	11	11	21	1.00157	0.981196	1.03473	0.965884	1.02324	0.999977	897	100.161	6.44287	0.990591	0.699634
UV8b_8332	[locus_tag=UV8b_8332] [protein=AP-1 complex subunit mu] [protein_id=KDB10821.1] [location=join(9780..9818,9920..10048,10136..11233,11394..11474)] [gbkey=CDS] - [JHTR01000110.1_prot_KDB10821.1_8332]	192.097	16.29	1	6	6	8	1.01338	0.999122	1.0509	0.908138	0.995286	1.00831	448	50.7852	6.7417	0.950492	0.222492
UV8b_4060	[locus_tag=UV8b_4060] [protein=translation regulator GCD7] [protein_id=KDB14914.1] [location=join(15677..15774,15853..17016,17100..17193)] [gbkey=CDS] - [JHTR01000019.1_prot_KDB14914.1_4060]	192.062	20.84	1	5	5	11	0.990063	0.985237	1.00715	1.06731	1.00911	0.961225	451	48.5933	6.21436	1.01851	0.589204
UV8b_4447	[locus_tag=UV8b_4447] [protein=putative CUE domain protein] [protein_id=KDB14591.1] [location=49967..50920] [gbkey=CDS] - [JHTR01000021.1_prot_KDB14591.1_4447]	191.876	32.81	1	9	9	15	1.00845	1.00951	0.990689	0.999471	0.961786	1.00052	317	35.3662	5.14795	0.984422	0.330819
UV8b_3177	[locus_tag=UV8b_3177] [protein=ATP synthase D chain] [protein_id=KDB15865.1] [location=join(158813..159046,159136..159194,159287..159614)] [gbkey=CDS] - [JHTR01000013.1_prot_KDB15865.1_3177]	191.862	34.95	1	4	5	8	0.991438	0.994926	1.11071	1.05296	0.976618	0.928936	206	22.432	4.58936	0.955262	0.435062
UV8b_2938	[locus_tag=UV8b_2938] [protein=neutral trehalase] [protein_id=KDB16008.1] [location=complement(join(100612..100765,100846..102715,102779..102842,102896..103027))] [gbkey=CDS] - [JHTR01000012.1_prot_KDB16008.1_2938]	191.648	19.62	1	14	14	22	1.04056	1.06156	1.0424	0.949911	0.924548	0.943724	739	85.4039	6.39209	0.89622	0.000432303
UV8b_5006	[locus_tag=UV8b_5006] [protein=6,7-dimethyl-8-ribityllumazine synthase] [protein_id=KDB14017.1] [location=join(43766..43968,44098..44491)] [gbkey=CDS] - [JHTR01000026.1_prot_KDB14017.1_5006]	191.519	28.79	1	4	4	12	0.948739	0.988853	1.05796	0.964715	1.05789	0.976123	198	20.5566	6.78564	1.00106	0.981688
UV8b_1607	[locus_tag=UV8b_1607] [protein=dsDNA-binding protein PDCD5] [protein_id=KDB17723.1] [location=complement(join(774484..774766,774883..775007,775046..775069))] [gbkey=CDS] - [JHTR01000005.1_prot_KDB17723.1_1607]	191.283	35.66	1	4	4	9	0.987349	1.01267	0.939391	1.07109	0.992745	1.02124	143	15.8912	5.2749	1.04956	0.196918
UV8b_8268	[locus_tag=UV8b_8268] [protein=eukaryotic translation initiation factor 2 beta subunit] [protein_id=KDB10864.1] [location=join(2507..3185,3309..3478)] [gbkey=CDS] - [JHTR01000102.1_prot_KDB10864.1_8268]	191.219	22.34	1	6	6	17	1.0437	1.04298	1.04982	0.923162	0.990423	0.960409	282	30.5376	8.92432	0.916304	0.0110723
UV8b_3848	[locus_tag=UV8b_3848] [protein=pre-mRNA processing splicing factor 8] [protein_id=KDB15422.1] [location=complement(471700..478881)] [gbkey=CDS] - [JHTR01000016.1_prot_KDB15422.1_3848]	191.218	6.81	1	15	15	18	1.00361	0.977075	0.946972	1.03579	1.00005	0.982523	2393	276.713	8.79248	1.03098	0.252938
UV8b_4675	[locus_tag=UV8b_4675] [protein=CRAL/TRIO domain protein] [protein_id=KDB14404.1] [location=complement(join(206944..207619,207719..208194))] [gbkey=CDS] - [JHTR01000023.1_prot_KDB14404.1_4675]	190.985	14.88	1	4	4	10	0.996071	0.975315	0.983668	1.00015	1.04313	1.04637	383	40.8116	5.07178	1.04554	0.0492312
UV8b_7001	[locus_tag=UV8b_7001] [protein=ubiquinol-cytochrome-C oxidoreductase complex III subunit VIII] [protein_id=KDB12177.1] [location=join(134156..134320,134392..134501,134660..134685,135009..135186,135245..135299)] [gbkey=CDS] - [JHTR01000049.1_prot_KDB12177.1_7001]	190.592	28.25	1	4	4	14	0.922816	0.976277	1.0818	0.949862	1.10688	1.02145	177	20.1564	10.4185	1.03264	0.644632
UV8b_1677	[locus_tag=UV8b_1677] [protein=putative glutathione-S-transferase theta, GST] [protein_id=KDB17420.1] [location=complement(24888..25721)] [gbkey=CDS] - [JHTR01000006.1_prot_KDB17420.1_1677]	190.545	16.97	1	4	4	8	0.953713	0.974609	1.05734	0.960289	1.07518	0.984772	277	31.4579	7.95752	1.01158	0.818822
UV8b_1914	[locus_tag=UV8b_1914] [protein=Isocitrate dehydrogenase [NAD] subunit 1 precursor] [protein_id=KDB17317.1] [location=join(598413..598445,598914..599932,600121..600205)] [gbkey=CDS] - [JHTR01000007.1_prot_KDB17317.1_1914]	190.542	32.8	1	11	11	33	1.02782	1.01337	1.01242	0.973137	0.963208	0.988075	378	41.1453	8.74854	0.95769	0.00800598
UV8b_7417	[locus_tag=UV8b_7417] [protein=U3 small nucleolar RNA-associated protein] [protein_id=KDB11708.1] [location=complement(join(38397..39302,39381..43512,43586..43962))] [gbkey=CDS] - [JHTR01000061.1_prot_KDB11708.1_7417]	190.517	6.04	1	7	7	8	0.972542	0.989011	1.03546	0.951663	1.05387	0.999627	1804	200.381	6.30322	1.00272	0.941879
UV8b_236	[locus_tag=UV8b_236] [protein=putative MFS multidrug transporter] [protein_id=KDB18845.1] [location=join(740729..742121,742200..742513)] [gbkey=CDS] - [JHTR01000001.1_prot_KDB18845.1_236]	190.505	2.99	1	1	1	4	0.90749	0.856248	0.73783	1.23444	1.11529	1.16526	568	60.5199	7.47412	1.40512	0.00518871
UV8b_2106	[locus_tag=UV8b_2106] [protein=peroxysomal citrate synthase] [protein_id=KDB17014.1] [location=complement(join(367434..367713,367806..369025))] [gbkey=CDS] - [JHTR01000008.1_prot_KDB17014.1_2106]	190.352	15.43	1	8	8	12	0.988099	1.00284	1.0413	0.970481	1.01173	0.997937	499	55.7123	8.98291	0.982819	0.433393
UV8b_4091	[locus_tag=UV8b_4091] [protein=dihydrodipicolinate synthase] [protein_id=KDB14945.1] [location=complement(join(105972..106536,106599..107059))] [gbkey=CDS] - [JHTR01000019.1_prot_KDB14945.1_4091]	190.246	21.41	1	5	5	11	0.989096	1.01429	0.992761	1.00015	0.980503	1.00601	341	36.4598	6.17627	0.996836	0.788392
UV8b_8237	[locus_tag=UV8b_8237] [protein=survival factor 1] [protein_id=KDB10915.1] [location=join(43188..43210,43298..43516,43612..44413,44496..44594)] [gbkey=CDS] - [JHTR01000093.1_prot_KDB10915.1_8237]	190.194	19.74	1	5	5	12	1.00497	0.986495	0.939066	1.03388	0.957344	1.03327	380	41.6834	5.2876	1.03206	0.384606
UV8b_768	[locus_tag=UV8b_768] [protein=26S proteasome non-ATPase regulatory subunit 11] [protein_id=KDB18526.1] [location=complement(join(814131..815137,815257..815339,815396..815577))] [gbkey=CDS] - [JHTR01000002.1_prot_KDB18526.1_768]	190.157	16.78	1	7	7	20	1.01218	1.00902	1.02781	0.979718	1.00375	0.985525	423	47.6287	6.39209	0.973761	0.0453288
UV8b_2759	[locus_tag=UV8b_2759] [protein=glycerol-3-phosphate dehydrogenase] [protein_id=KDB16303.1] [location=join(223534..223604,223735..224950)] [gbkey=CDS] - [JHTR01000011.1_prot_KDB16303.1_2759]	189.969	25.47	1	7	7	12	0.99365	1.00387	1.02867	0.986596	1.03014	1.00964	428	46.1434	6.59521	1.00006	0.997284
UV8b_6298	[locus_tag=UV8b_6298] [protein=ubiquitin-like activating enzyme] [protein_id=KDB12804.1] [location=join(23121..23720,23816..24122,24201..24562)] [gbkey=CDS] - [JHTR01000039.1_prot_KDB12804.1_6298]	189.774	25.59	1	7	7	10	0.989081	0.967115	0.952506	1.06845	0.95415	1.04955	422	47.0525	6.0874	1.05619	0.214221
UV8b_5341	[locus_tag=UV8b_5341] [protein=ran GTPase activating protein 1] [protein_id=KDB13734.1] [location=complement(join(110442..111509,111599..111796))] [gbkey=CDS] - [JHTR01000029.1_prot_KDB13734.1_5341]	189.381	18.29	1	5	6	13	1.01844	1.00941	0.982026	1.01147	0.95377	0.973169	421	45.9702	4.94482	0.976258	0.303252
UV8b_6696	[locus_tag=UV8b_6696] [protein=putative ribosomal elongation factor EF-2] [protein_id=KDB12472.1] [location=complement(join(161588..162153,162230..162317,162411..164554,164639..164775,164874..164893))] [gbkey=CDS] - [JHTR01000044.1_prot_KDB12472.1_6696]	189.29	12.8	1	10	10	19	1.02311	0.989898	0.993338	1.02741	0.992516	0.991502	984	109.34	5.2876	1.00169	0.91997
UV8b_4574	[locus_tag=UV8b_4574] [protein=succinyl-CoA:3-ketoacid-coenzyme A transferase subunit A] [protein_id=KDB14718.1] [location=complement(join(562687..562818,562926..564276,564367..564377))] [gbkey=CDS] - [JHTR01000021.1_prot_KDB14718.1_4574]	189.24	16.5	1	7	8	18	1.0295	1.09763	1.10788	0.904871	0.949847	0.87877	497	53.1094	7.7085	0.844971	0.00654189
UV8b_4011	[locus_tag=UV8b_4011] [protein=putative B56-delta regulatory subunit of protein phosphatase 2A] [protein_id=KDB15171.1] [location=389222..389830] [gbkey=CDS] - [JHTR01000018.1_prot_KDB15171.1_4011]	189.223	20.3	2	4	4	12	0.996859	1.01156	0.991348	1.0063	1.0135	0.994344	202	22.9592	5.63037	1.00479	0.59106
UV8b_1282	[locus_tag=UV8b_1282] [protein=putative nuclear pore complex subunit Nup192] [protein_id=KDB17915.1] [location=join(473501..473690,473763..474371,474435..478148,478240..478670,478752..478808)] [gbkey=CDS] - [JHTR01000004.1_prot_KDB17915.1_1282]	189.202	4.98	1	8	8	13	1.00456	1.0126	1.01081	0.976631	1.01007	0.98304	1666	185.588	5.24951	0.98077	0.139142
UV8b_941	[locus_tag=UV8b_941] [protein=DNA-directed RNA polymerase II largest subunit] [protein_id=KDB18093.1] [location=complement(join(309399..309426,309506..314412,314538..314894))] [gbkey=CDS] - [JHTR01000003.1_prot_KDB18093.1_941]	188.919	8.05	1	13	13	21	1.01461	1.0074	1.00949	0.997073	1.01051	0.991523	1763	193.601	6.32861	0.989313	0.147711
UV8b_3255	[locus_tag=UV8b_3255] [protein=ferrochelatase precursor] [protein_id=KDB15943.1] [location=join(425038..425274,425354..426382)] [gbkey=CDS] - [JHTR01000013.1_prot_KDB15943.1_3255]	188.695	20.67	1	6	6	10	1.00366	1.00779	1.04162	0.956722	1.0383	0.996477	421	46.7237	8.6167	0.97983	0.480941
UV8b_5853	[locus_tag=UV8b_5853] [protein=topoisomerase II-associated protein PAT1] [protein_id=KDB13263.1] [location=complement(join(135514..135802,135874..138065))] [gbkey=CDS] - [JHTR01000033.1_prot_KDB13263.1_5853]	188.32	16.71	1	9	10	17	0.993194	1.00563	1.00476	0.97436	0.977471	1.00832	826	91.5324	7.02002	0.98554	0.278478
UV8b_4528	[locus_tag=UV8b_4528] [protein=hypothetical protein] [protein_id=KDB14672.1] [location=complement(join(300060..300698,300770..300946,301014..301582,301661..302298,302466..302572))] [gbkey=CDS] - [JHTR01000021.1_prot_KDB14672.1_4528]	188.277	16.64	1	9	9	11	1.09916	1.03502	0.991136	0.991535	0.914231	0.938215	709	77.1525	5.04639	0.909981	0.0730241
UV8b_1856	[locus_tag=UV8b_1856] [protein=protein transport protein SEC61 alpha subunit] [protein_id=KDB17259.1] [location=join(369146..369155,369334..370682)] [gbkey=CDS] - [JHTR01000007.1_prot_KDB17259.1_1856]	187.93	9.96	1	4	4	11	1.01727	1.01517	0.946192	1.01651	0.960109	0.984395	452	49.615	8.45557	0.994083	0.846745
UV8b_2196	[locus_tag=UV8b_2196] [protein=hypothetical protein] [protein_id=KDB17104.1] [location=complement(686164..688353)] [gbkey=CDS] - [JHTR01000008.1_prot_KDB17104.1_2196]	187.775	10.7	1	6	6	7	0.977837	0.968759	1.12665	0.979591	1.02956	1.01563	729	80.2781	9.83252	0.984233	0.776982
UV8b_5528	[locus_tag=UV8b_5528] [protein=uracil phosphoribosyltransferase] [protein_id=KDB13696.1] [location=complement(join(301977..302381,302472..302564,302658..302834))] [gbkey=CDS] - [JHTR01000030.1_prot_KDB13696.1_5528]	186.913	40.63	1	5	5	11	1.04867	1.03001	0.985891	0.983557	0.916421	0.972954	224	23.5273	6.27783	0.937469	0.084202
UV8b_3929	[locus_tag=UV8b_3929] [protein=GYF domain protein] [protein_id=KDB15266.1] [location=complement(join(592299..592618,592716..596259,596377..596839,597110..597219))] [gbkey=CDS] - [JHTR01000017.1_prot_KDB15266.1_3929]	186.788	10.15	1	10	11	15	1.00821	0.997954	0.905127	1.04789	0.965355	1.02921	1478	153.194	8.52881	1.04505	0.348664
UV8b_8313	[locus_tag=UV8b_8313] [protein=magnesium-translocating P-type ATPase family protein] [protein_id=KDB10842.1] [location=complement(join(13741..14014,14164..14311,14373..14490,14557..14628,14696..15715,15817..16032,16093..16214,16285..16735,16800..17090))] [gbkey=CDS] - [JHTR01000104.1_prot_KDB10842.1_8313]	186.761	9.3	1	6	6	8	0.852204	0.820009	0.77521	1.26138	1.13733	1.24075	903	98.2634	5.94775	1.48706	0.000862137
UV8b_874	[locus_tag=UV8b_874] [protein=hypothetical protein] [protein_id=KDB18026.1] [location=complement(join(100123..101879,101946..102500,102582..102861))] [gbkey=CDS] - [JHTR01000003.1_prot_KDB18026.1_874]	186.757	17.15	1	14	14	27	0.988597	1.01065	0.983209	1.02011	0.991179	0.998343	863	94.8076	6.31592	1.00911	0.49527
UV8b_1726	[locus_tag=UV8b_1726] [protein=putative SPO76 protein] [protein_id=KDB17469.1] [location=join(696941..697399,697494..700940,701026..701622)] [gbkey=CDS] - [JHTR01000006.1_prot_KDB17469.1_1726]	186.631	9.8	1	12	12	16	0.971331	0.981828	0.971504	1.04835	0.998042	1.03104	1500	166.681	6.30322	1.05223	0.0283202
UV8b_6365	[locus_tag=UV8b_6365] [protein=ATP-dependent RNA helicase DHH1] [protein_id=KDB12709.1] [location=join(29192..29235,29388..29466,29646..31169)] [gbkey=CDS] - [JHTR01000040.1_prot_KDB12709.1_6365]	186.565	11.13	1	4	4	11	0.971269	1.01567	1.03175	0.957701	1.03368	1.03055	548	61.9716	8.86572	1.00107	0.973671
UV8b_7872	[locus_tag=UV8b_7872] [protein=hypothetical protein] [protein_id=KDB11262.1] [location=complement(join(36952..39354,40098..40253,40462..40548))] [gbkey=CDS] - [JHTR01000075.1_prot_KDB11262.1_7872]	186.555	7.95	1	7	7	11	0.945621	0.940566	0.95069	1.03859	1.1102	1.0794	881	94.8181	7.07861	1.13794	0.00338521
UV8b_6690	[locus_tag=UV8b_6690] [protein=hisactophilin c49s mutant phototropin phy3 fusion protein] [protein_id=KDB12466.1] [location=complement(join(138187..139343,139421..140193,140282..140490))] [gbkey=CDS] - [JHTR01000044.1_prot_KDB12466.1_6690]	185.919	8.15	1	5	5	11	0.938708	0.974368	1.01006	1.00418	1.04994	1.04907	712	77.6884	7.10791	1.06159	0.0785862
UV8b_1910	[locus_tag=UV8b_1910] [protein=mRNA binding post-transcriptional regulator] [protein_id=KDB17313.1] [location=complement(join(578404..578589,578640..578883,578946..579053,579126..579217))] [gbkey=CDS] - [JHTR01000007.1_prot_KDB17313.1_1910]	185.801	21.05	1	4	4	8	0.948356	1.01894	1.10249	0.933337	1.03225	1.00093	209	22.347	8.60205	0.96636	0.553275
UV8b_5590	[locus_tag=UV8b_5590] [protein=prohibitin-2] [protein_id=KDB13492.1] [location=complement(join(105298..105618,105707..106062,106258..106675))] [gbkey=CDS] - [JHTR01000031.1_prot_KDB13492.1_5590]	185.655	22.25	1	6	6	14	1.0153	1.01021	1.03105	0.96536	0.990684	0.985974	364	39.925	9.70068	0.962525	0.0187575
UV8b_3862	[locus_tag=UV8b_3862] [protein=Translationally-controlled tumor protein] [protein_id=KDB15436.1] [location=complement(join(514911..514995,515135..515297,515405..515542,515778..515886))] [gbkey=CDS] - [JHTR01000016.1_prot_KDB15436.1_3862]	185.395	23.17	1	6	6	23	1.0991	1.05424	0.955142	1.02277	0.873895	0.899044	164	18.1212	5.99854	0.89938	0.171436
UV8b_1853	[locus_tag=UV8b_1853] [protein=succinate dehydrogenase cytochrome b subunit] [protein_id=KDB17256.1] [location=complement(join(359881..360325,360441..360501,360572..360611))] [gbkey=CDS] - [JHTR01000007.1_prot_KDB17256.1_1853]	185.05	18.23	1	3	3	14	0.971442	0.972753	0.969786	0.985927	1.05314	1.05549	181	19.5095	10.3306	1.06197	0.0577348
UV8b_17	[locus_tag=UV8b_17] [protein=putative glycine cleavage system H protein] [protein_id=KDB18626.1] [location=complement(join(69968..70365,70475..70577))] [gbkey=CDS] - [JHTR01000001.1_prot_KDB18626.1_17]	185.021	27.71	1	3	3	9	0.933327	0.979261	1.05994	0.90763	1.14664	1.08944	166	17.7538	4.88135	1.05759	0.520016
UV8b_4136	[locus_tag=UV8b_4136] [protein=ureidoglycolate hydrolase] [protein_id=KDB14990.1] [location=join(255531..255644,255819..256673)] [gbkey=CDS] - [JHTR01000019.1_prot_KDB14990.1_4136]	184.945	17.39	1	5	5	9	1.00737	1.01301	1.05992	0.963318	1.02203	0.986346	322	35.807	6.69775	0.964742	0.203738
UV8b_5158	[locus_tag=UV8b_5158] [protein=signal recognition particle protein] [protein_id=KDB14002.1] [location=480536..481630] [gbkey=CDS] - [JHTR01000027.1_prot_KDB14002.1_5158]	184.758	17.03	1	4	4	6	1.00192	0.987002	0.9553	1.05223	1.0083	1.00555	364	39.5941	9.67139	1.04139	0.117769
UV8b_404	[locus_tag=UV8b_404] [protein=eukaryotic translation initiation factor 5] [protein_id=KDB19013.1] [location=complement(1680435..1681811)] [gbkey=CDS] - [JHTR01000001.1_prot_KDB19013.1_404]	184.745	12.01	1	6	6	12	1.01816	1.01697	0.995882	0.999671	0.979599	0.987692	458	50.9701	5.56689	0.978868	0.083165
UV8b_7864	[locus_tag=UV8b_7864] [protein=putative Ubiquitin carboxyl-terminal hydrolase] [protein_id=KDB11254.1] [location=complement(join(7991..8361,8460..8837,9403..9799,9882..9965,10041..10113,10205..10306,10429..10564,10633..10651))] [gbkey=CDS] - [JHTR01000075.1_prot_KDB11254.1_7864]	184.574	18.69	2	7	8	14	0.96746	0.977899	0.88213	1.09779	1.01986	1.05022	519	56.4205	5.80811	1.12038	0.0401106
UV8b_7721	[locus_tag=UV8b_7721] [protein=5-aminolevulinate synthase precursor] [protein_id=KDB11408.1] [location=join(43434..43800,43910..45399)] [gbkey=CDS] - [JHTR01000071.1_prot_KDB11408.1_7721]	184.569	13.43	1	6	7	15	0.967307	0.984185	0.966667	1.00542	1.09409	0.983975	618	66.909	8.63135	1.05665	0.182277
UV8b_3051	[locus_tag=UV8b_3051] [protein=diphosphomevalonate decarboxylase] [protein_id=KDB16121.1] [location=complement(join(420482..421595,421723..421784))] [gbkey=CDS] - [JHTR01000012.1_prot_KDB16121.1_3051]	184.456	22.51	1	7	7	10	1.05052	1.06242	1.06137	0.915009	0.938173	0.982638	391	41.6658	7.1958	0.893367	0.0050429
UV8b_4351	[locus_tag=UV8b_4351] [protein=hypothetical protein] [protein_id=KDB14828.1] [location=302229..303482] [gbkey=CDS] - [JHTR01000020.1_prot_KDB14828.1_4351]	184.396	15.83	1	6	7	20	0.994309	1.01864	0.990559	1.0072	1.02712	1.02052	417	44.8843	6.22705	1.01709	0.180856
UV8b_1498	[locus_tag=UV8b_1498] [protein=putative PHD finger domain protein] [protein_id=KDB17614.1] [location=join(439605..440213,440293..442320)] [gbkey=CDS] - [JHTR01000005.1_prot_KDB17614.1_1498]	184.316	12.19	2	9	10	15	0.972592	0.953102	0.973199	1.03001	1.1061	1.03452	878	96.9134	7.76709	1.09374	0.0238005
UV8b_7687	[locus_tag=UV8b_7687] [protein=class v chitinase] [protein_id=KDB11464.1] [location=join(91922..92189,92250..92407,92472..92635,92694..94746,94826..95455)] [gbkey=CDS] - [JHTR01000068.1_prot_KDB11464.1_7687]	184.242	8.35	1	8	8	17	0.785693	0.791004	0.761875	1.25439	1.32917	1.29747	1090	118.319	7.07861	1.65957	2.55948e-05
UV8b_2149	[locus_tag=UV8b_2149] [protein=putative nuclear serine protease HtrA2/Nma111] [protein_id=KDB17057.1] [location=complement(join(485145..485353,485478..487775,487853..488049,488149..488495))] [gbkey=CDS] - [JHTR01000008.1_prot_KDB17057.1_2149]	183.548	18.11	1	13	13	21	0.999595	0.976482	0.998843	1.01375	1.00509	0.997613	1016	111.86	5.5415	1.01396	0.194841
UV8b_2173	[locus_tag=UV8b_2173] [protein=Signal recognition particle 68 kDa protein] [protein_id=KDB17081.1] [location=complement(join(581780..582317,582419..583570,583656..583846))] [gbkey=CDS] - [JHTR01000008.1_prot_KDB17081.1_2173]	182.924	17.41	1	9	9	14	1.02984	1.00353	1.03538	0.979183	0.979547	1.00471	626	69.0571	9.43701	0.965684	0.0535856
UV8b_3389	[locus_tag=UV8b_3389] [protein=phospholipase A-2-activating protein] [protein_id=KDB15749.1] [location=join(334399..334449,334513..335902,336118..336893)] [gbkey=CDS] - [JHTR01000014.1_prot_KDB15749.1_3389]	182.856	15.99	1	7	7	13	1.00624	1.0038	0.965287	1.03925	0.973661	1.02107	738	78.8071	5.71924	1.01971	0.454479
UV8b_6673	[locus_tag=UV8b_6673] [protein=cell wall glycoprotein] [protein_id=KDB12449.1] [location=complement(81889..82809)] [gbkey=CDS] - [JHTR01000044.1_prot_KDB12449.1_6673]	182.771	13.73	1	2	2	6	1.20378	1.30288	1.21233	0.733348	0.746828	0.745889	306	30.1574	7.47412	0.598566	9.98447e-05
UV8b_1802	[locus_tag=UV8b_1802] [protein=phospholipid-translocating P-type ATPase domain-containing protein] [protein_id=KDB17205.1] [location=join(201846..202928,203043..206251,206357..207260)] [gbkey=CDS] - [JHTR01000007.1_prot_KDB17205.1_1802]	182.713	3.93	1	6	6	8	0.987011	0.934177	0.933191	1.02433	1.00798	1.03878	1731	194.815	7.07861	1.07592	0.0220861
UV8b_7007	[locus_tag=UV8b_7007] [protein=putative endoglucanase] [protein_id=KDB12183.1] [location=162183..163850] [gbkey=CDS] - [JHTR01000049.1_prot_KDB12183.1_7007]	182.57	13.51	1	7	7	13	1.00404	1.01715	1.04471	0.949578	0.965897	0.996019	555	59.6699	6.75635	0.949639	0.0469224
UV8b_6062	[locus_tag=UV8b_6062] [protein=proteasome component PRE3 precursor] [protein_id=KDB13062.1] [location=complement(join(121252..121570,121664..121904,121962..121996,122057..122071,122135..122180,122248..122281))] [gbkey=CDS] - [JHTR01000036.1_prot_KDB13062.1_6062]	181.352	21.4	1	4	4	13	0.981681	0.954512	1.07248	0.963695	1.13238	0.965985	229	25.0184	6.43018	1.01775	0.801549
UV8b_4057	[locus_tag=UV8b_4057] [protein=putative H/ACA ribonucleoprotein complex subunit] [protein_id=KDB14911.1] [location=join(8536..8854,8974..9419)] [gbkey=CDS] - [JHTR01000019.1_prot_KDB14911.1_4057]	181.326	25.59	1	6	7	18	1.00594	1.03916	1.01375	0.960824	1.00092	1.00574	254	27.4906	9.40771	0.97013	0.15521
UV8b_2568	[locus_tag=UV8b_2568] [protein=UDP-glucose:glycoprotein glucosyltransferase precursor] [protein_id=KDB16533.1] [location=195860..198799] [gbkey=CDS] - [JHTR01000010.1_prot_KDB16533.1_2568]	181.323	6.44	1	6	6	10	1.00123	1.01108	1.02491	0.983615	1.03029	0.996934	979	110.886	5.64307	0.991315	0.600534
UV8b_456	[locus_tag=UV8b_456] [protein=glutamate decarboxylase] [protein_id=KDB19065.1] [location=complement(1965152..1966675)] [gbkey=CDS] - [JHTR01000001.1_prot_KDB19065.1_456]	181.072	8.09	1	3	4	11	0.932349	0.903299	0.883947	1.10585	1.1473	1.09369	507	56.7563	7.6792	1.23064	0.00062334
UV8b_1827	[locus_tag=UV8b_1827] [protein=isovaleryl-CoA dehydrogenase precursor] [protein_id=KDB17230.1] [location=join(280466..280770,280827..280846,280906..282148,282252..282342)] [gbkey=CDS] - [JHTR01000007.1_prot_KDB17230.1_1827]	181.018	4.89	1	3	3	7	0.99587	1.03217	0.901374	1.08442	0.920154	1.01485	552	58.8123	9.49561	1.03072	0.651351
UV8b_6075	[locus_tag=UV8b_6075] [protein=3-hydroxybutyryl-CoA dehydrogenase] [protein_id=KDB13075.1] [location=complement(join(165460..166190,166287..166386,166566..166625))] [gbkey=CDS] - [JHTR01000036.1_prot_KDB13075.1_6075]	181.003	13.18	1	4	4	12	0.978686	1.03488	1.06166	0.979908	1.01898	0.966095	296	31.5405	8.03076	0.964153	0.275701
UV8b_2113	[locus_tag=UV8b_2113] [protein=epsin domain containing protein] [protein_id=KDB17021.1] [location=complement(383254..384879)] [gbkey=CDS] - [JHTR01000008.1_prot_KDB17021.1_2113]	180.937	10.91	1	5	5	12	0.979399	0.977951	1.00183	0.965192	1.07277	0.978438	541	55.6794	8.83643	1.01934	0.612175
UV8b_7424	[locus_tag=UV8b_7424] [protein=histone acetyltransferase type B catalytic subunit] [protein_id=KDB11715.1] [location=complement(join(70305..71437,71486..71770,71838..71865))] [gbkey=CDS] - [JHTR01000061.1_prot_KDB11715.1_7424]	180.102	28.9	1	9	9	15	1.02806	1.01993	0.954115	1.02077	0.969011	0.98152	481	54.759	5.60498	0.989738	0.733533
UV8b_3502	[locus_tag=UV8b_3502] [protein=peptide methionine sulfoxide] [protein_id=KDB15471.1] [location=join(42517..42597,42681..42957,43041..43390)] [gbkey=CDS] - [JHTR01000015.1_prot_KDB15471.1_3502]	179.922	28.51	1	5	5	8	0.956539	0.963997	1.00666	1.01561	1.07442	1.03661	235	26.2182	8.98291	1.06813	0.0458685
UV8b_1777	[locus_tag=UV8b_1777] [protein=60S ribosomal protein L24a] [protein_id=KDB17180.1] [location=complement(join(105763..106050,106251..106394,106690..106740))] [gbkey=CDS] - [JHTR01000007.1_prot_KDB17180.1_1777]	179.917	26.88	1	6	6	19	1.04571	1.07427	1.03158	0.957547	0.92575	0.938644	160	17.947	11.5464	0.895412	0.00213439
UV8b_5977	[locus_tag=UV8b_5977] [protein=mitochondrial distribution and morphology protein 38] [protein_id=KDB13217.1] [location=join(282512..282572,282632..284184)] [gbkey=CDS] - [JHTR01000034.1_prot_KDB13217.1_5977]	179.426	23.65	2	11	12	23	0.987918	0.982808	1.01165	0.997626	1.05506	1.03978	537	59.8097	7.63525	1.03691	0.130587
UV8b_5149	[locus_tag=UV8b_5149] [protein=putative choline kinase] [protein_id=KDB14160.1] [location=complement(join(524062..524799,524965..526644))] [gbkey=CDS] - [JHTR01000026.1_prot_KDB14160.1_5149]	179.368	14.29	3	10	10	13	0.965864	0.990468	0.999044	1.03771	1.06658	1.01444	805	89.7995	7.85498	1.05527	0.0393922
UV8b_659	[locus_tag=UV8b_659] [protein=orotidine-5'-phosphate decarboxylase] [protein_id=KDB18417.1] [location=496406..497518] [gbkey=CDS] - [JHTR01000002.1_prot_KDB18417.1_659]	179.22	20.81	1	6	6	10	1.03079	1.02122	0.947042	1.02342	0.930171	1.02563	370	40.2358	5.47803	0.993387	0.880044
UV8b_6909	[locus_tag=UV8b_6909] [protein=vacuolar ATP synthase subunit G] [protein_id=KDB12205.1] [location=complement(join(117511..117678,117761..117861,117944..117952,118037..118070,118147..118152))] [gbkey=CDS] - [JHTR01000048.1_prot_KDB12205.1_6909]	179.108	29.52	1	4	4	21	0.956946	0.997703	0.995285	0.968446	1.06768	1.02361	105	11.7222	9.33447	1.03722	0.311151
UV8b_3336	[locus_tag=UV8b_3336] [protein=putative nucleoporin SONB] [protein_id=KDB15696.1] [location=join(153162..153273,153349..153462,153582..157300,157476..157706,157793..159397,159550..159660)] [gbkey=CDS] - [JHTR01000014.1_prot_KDB15696.1_3336]	179.064	7.13	1	11	11	18	0.974283	0.975386	0.976927	1.03493	1.00686	1.01074	1963	206.894	5.77002	1.04303	0.00889818
UV8b_3996	[locus_tag=UV8b_3996] [protein=elongation factor 1-beta] [protein_id=KDB15156.1] [location=complement(join(334720..334949,335103..335580))] [gbkey=CDS] - [JHTR01000018.1_prot_KDB15156.1_3996]	179.051	24.68	1	5	6	21	0.990658	1.00987	0.948161	1.02624	1.01141	1.00868	235	26.064	4.88135	1.03311	0.162381
UV8b_2180	[locus_tag=UV8b_2180] [protein=Orotate phosphoribosyltransferase] [protein_id=KDB17088.1] [location=complement(631949..632653)] [gbkey=CDS] - [JHTR01000008.1_prot_KDB17088.1_2180]	178.702	34.19	1	5	5	11	1.00239	0.997922	0.987502	1.01751	1.02392	1.00199	234	25.2313	6.11279	1.01861	0.0779344
UV8b_593	[locus_tag=UV8b_593] [protein=ATP-binding cassette protein] [protein_id=KDB18351.1] [location=complement(join(263876..264665,264746..265419,265499..266020))] [gbkey=CDS] - [JHTR01000002.1_prot_KDB18351.1_593]	178.564	4.54	1	2	2	4	0.971875	0.964669	0.907932	1.06518	1.04726	1.04444	661	74.6417	8.90967	1.10983	0.00802535
UV8b_3921	[locus_tag=UV8b_3921] [protein=allergen asp f4-like protein] [protein_id=KDB15258.1] [location=complement(561710..562570)] [gbkey=CDS] - [JHTR01000017.1_prot_KDB15258.1_3921]	178.356	22.73	1	3	3	6	0.983679	1.00344	1.02727	0.993555	1.02749	0.987386	286	29.3954	7.69385	0.998024	0.916204
UV8b_7551	[locus_tag=UV8b_7551] [protein=chromatin assembly factor 1 subunit C] [protein_id=KDB11584.1] [location=join(60778..60814,60893..60946,61017..61068,61156..61671,61757..62242,62486..62660)] [gbkey=CDS] - [JHTR01000065.1_prot_KDB11584.1_7551]	178.131	33.94	1	9	9	11	0.992024	0.983497	0.944178	1.01295	1.04778	1.02226	439	48.8241	4.81787	1.05593	0.039286
UV8b_7637	[locus_tag=UV8b_7637] [protein=glucose-repressible alcohol dehydrogenase transcriptional effector] [protein_id=KDB11492.1] [location=join(54427..55252,55372..56594)] [gbkey=CDS] - [JHTR01000067.1_prot_KDB11492.1_7637]	178.114	11.88	1	6	6	11	0.992414	0.971779	0.919026	1.0527	1.01459	1.04434	682	77.6287	6.59521	1.07922	0.0369413
UV8b_7899	[locus_tag=UV8b_7899] [protein=NADH:ubiquinone oxidoreductase 20.8kD subunit] [protein_id=KDB11289.1] [location=complement(join(118507..118647,118762..118894,119079..119306,119408..119427))] [gbkey=CDS] - [JHTR01000075.1_prot_KDB11289.1_7899]	178.042	42.77	1	6	6	13	0.965613	0.991719	0.958314	1.01387	1.06059	1.05541	173	19.8829	8.11865	1.07348	0.016361
UV8b_7427	[locus_tag=UV8b_7427] [protein=cAMP-dependent protein kinase catalytic subunit] [protein_id=KDB11718.1] [location=complement(join(78442..78469,78540..78917,78989..79242,79349..80395))] [gbkey=CDS] - [JHTR01000061.1_prot_KDB11718.1_7427]	177.75	14.96	1	6	8	12	0.962862	0.978678	1.00058	0.997197	1.07215	1.0375	568	63.5067	8.38232	1.05599	0.0863877
UV8b_8076	[locus_tag=UV8b_8076] [protein=cytochrome P450] [protein_id=KDB11088.1] [location=complement(join(78400..79462,79589..80106))] [gbkey=CDS] - [JHTR01000081.1_prot_KDB11088.1_8076]	177.58	8.37	1	4	4	7	0.890625	0.889817	0.869902	1.16595	1.16704	1.09703	526	58.3533	9.1001	1.29418	0.000421346
UV8b_6639	[locus_tag=UV8b_6639] [protein=40S ribosomal protein S24] [protein_id=KDB12514.1] [location=join(95145..95227,95675..95922,96013..96092)] [gbkey=CDS] - [JHTR01000043.1_prot_KDB12514.1_6639]	177.501	36.03	1	7	7	25	1.07056	1.03715	1.01158	1.00019	0.947343	0.935127	136	15.5275	10.9458	0.924141	0.0398547
UV8b_6853	[locus_tag=UV8b_6853] [protein=Fe-S cluster assembly protein DRE2] [protein_id=KDB12254.1] [location=join(704..1295,1385..1683)] [gbkey=CDS] - [JHTR01000047.1_prot_KDB12254.1_6853]	177.406	30.41	1	6	6	8	0.998707	1.00464	0.97857	0.973164	0.998918	1.01637	296	32.0343	5.21143	1.00219	0.890382
UV8b_5925	[locus_tag=UV8b_5925] [protein=exonuclease] [protein_id=KDB13165.1] [location=complement(join(93021..95635,95749..97056,97113..97422,97480..97573,98503..98885,98966..100148,100224..100327))] [gbkey=CDS] - [JHTR01000034.1_prot_KDB13165.1_5925]	177.211	8.06	1	14	14	20	0.971505	1.00172	1.0564	0.974466	1.02012	0.984123	1998	222.736	7.35693	0.983195	0.5831
UV8b_1992	[locus_tag=UV8b_1992] [protein=rRNA 2'-O-methyltransferase fibrillarin] [protein_id=KDB17395.1] [location=join(840355..840481,840553..840680,840766..841429,841497..841555)] [gbkey=CDS] - [JHTR01000007.1_prot_KDB17395.1_1992]	177.091	30.46	1	9	9	15	0.996456	1.03037	1.04117	0.950562	1.02945	0.972161	325	34.0373	10.3306	0.962247	0.227643
UV8b_2039	[locus_tag=UV8b_2039] [protein=deoxyhypusine hydroxylase] [protein_id=KDB16947.1] [location=join(131470..131927,131987..132497)] [gbkey=CDS] - [JHTR01000008.1_prot_KDB16947.1_2039]	177.059	21.43	1	5	5	8	1.02027	1.0391	0.988861	0.956243	0.964219	0.987629	322	35.2878	4.81787	0.954027	0.0551293
UV8b_6825	[locus_tag=UV8b_6825] [protein=streptomycin biosynthesis protein StrI] [protein_id=KDB12338.1] [location=complement(join(117802..119389,119544..119673,119784..119790))] [gbkey=CDS] - [JHTR01000046.1_prot_KDB12338.1_6825]	176.969	12.89	1	6	6	10	0.954554	0.984753	0.947996	1.04374	1.06931	1.04825	574	63.9168	6.99072	1.0949	0.00269595
UV8b_5622	[locus_tag=UV8b_5622] [protein=NADH-dependent flavin oxidoreductase-like protein] [protein_id=KDB13524.1] [location=join(191323..192015,192080..192244,192358..192581,192629..193214)] [gbkey=CDS] - [JHTR01000031.1_prot_KDB13524.1_5622]	176.955	16.76	1	9	11	19	1.0837	1.05981	1.08243	0.917823	0.927742	0.895553	555	61.6586	6.7417	0.84971	0.000192532
UV8b_6842	[locus_tag=UV8b_6842] [protein=putative sister chromatid separation protein (Src1)] [protein_id=KDB12355.1] [location=join(227359..228860,228998..229586)] [gbkey=CDS] - [JHTR01000046.1_prot_KDB12355.1_6842]	176.913	13.79	1	8	8	9	0.974794	0.96153	1.00286	0.990395	1.02142	1.04108	696	77.6917	8.30908	1.03869	0.118675
UV8b_6798	[locus_tag=UV8b_6798] [protein=Phosphatidylinositol-specific phospholipase C, X domain containing protein] [protein_id=KDB12311.1] [location=complement(36383..37801)] [gbkey=CDS] - [JHTR01000046.1_prot_KDB12311.1_6798]	176.903	14.19	1	5	5	8	0.843624	0.876948	0.955969	1.01181	1.14687	1.19355	472	52.5983	5.77002	1.25245	0.0243079
UV8b_8352	[locus_tag=UV8b_8352] [protein=checkpoint kinase 2-like protein] [protein_id=KDB10800.1] [location=join(18022..18066,18176..18752,18851..19443,19584..19953,20042..20490)] [gbkey=CDS] - [JHTR01000121.1_prot_KDB10800.1_8352]	176.788	15.36	1	7	7	9	0.872363	0.925713	0.957955	1.05475	1.02279	1.09236	677	75.0962	7.23975	1.15017	0.0125985
UV8b_2850	[locus_tag=UV8b_2850] [protein=mitochondrial nuclease] [protein_id=KDB16394.1] [location=500828..501943] [gbkey=CDS] - [JHTR01000011.1_prot_KDB16394.1_2850]	176.601	20.22	1	6	6	11	0.98012	0.999301	0.977367	1.0547	0.991946	1.01701	371	39.8461	9.21729	1.03614	0.141734
UV8b_4872	[locus_tag=UV8b_4872] [protein=cation-transporting ATPase 4] [protein_id=KDB14277.1] [location=join(298680..299036,299117..302163,302385..302922)] [gbkey=CDS] - [JHTR01000024.1_prot_KDB14277.1_4872]	176.584	8	1	10	11	19	1.03514	1.04127	1.01722	0.953379	0.986254	0.936342	1313	146.022	7.44482	0.929646	0.0113075
UV8b_6229	[locus_tag=UV8b_6229] [protein=D-galacturonic acid reductase] [protein_id=KDB12868.1] [location=complement(join(16132..16328,16436..16682,16772..16905,16971..16998,17135..17400,17511..17568))] [gbkey=CDS] - [JHTR01000038.1_prot_KDB12868.1_6229]	176.371	18.77	1	6	6	12	0.993239	1.00889	1.04962	0.978209	1.00226	1.01219	309	34.2335	6.55127	0.980637	0.37178
UV8b_1737	[locus_tag=UV8b_1737] [protein=glutamate 5-kinase] [protein_id=KDB17480.1] [location=complement(join(736374..737113,737229..737499,737810..737997,738143..738196,738432..738576))] [gbkey=CDS] - [JHTR01000006.1_prot_KDB17480.1_1737]	176.344	11.61	1	4	4	7	0.976652	1.04679	0.977404	1.02736	0.997115	1.02313	465	50.3426	6.56592	1.01558	0.568327
UV8b_7213	[locus_tag=UV8b_7213] [protein=hypothetical protein] [protein_id=KDB11984.1] [location=join(187812..187871,188042..188803,188919..189077,189262..189359,189504..190224)] [gbkey=CDS] - [JHTR01000054.1_prot_KDB11984.1_7213]	175.744	8.68	2	4	4	6	0.940995	0.952502	0.988859	1.01167	1.07637	1.07762	599	62.4744	5.14795	1.09829	0.0224514
UV8b_6516	[locus_tag=UV8b_6516] [protein=hypothetical protein] [protein_id=KDB12670.1] [location=complement(join(196199..196955,197119..197346,197634..197719))] [gbkey=CDS] - [JHTR01000041.1_prot_KDB12670.1_6516]	175.74	16.57	1	5	5	12	0.919329	0.96784	0.984713	1.05242	1.01717	1.09938	356	38.3099	9.5835	1.10345	0.0325531
UV8b_2179	[locus_tag=UV8b_2179] [protein=DNA damage-inducible protein 1] [protein_id=KDB17087.1] [location=complement(join(626790..627538,627606..628161))] [gbkey=CDS] - [JHTR01000008.1_prot_KDB17087.1_2179]	175.48	15.67	1	6	6	11	1.04746	0.965731	0.978745	1.0023	1.03323	0.996721	434	46.9849	5.85889	1.01348	0.653812
UV8b_2089	[locus_tag=UV8b_2089] [protein=ERG4/ERG24 ergosterol biosynthesis-like protein] [protein_id=KDB16997.1] [location=join(324856..325611,325685..325750)] [gbkey=CDS] - [JHTR01000008.1_prot_KDB16997.1_2089]	174.709	25.27	1	7	7	18	0.708009	0.704392	0.70034	1.24364	1.48	1.27482	273	30.1886	9.08545	1.89254	0.00106265
UV8b_3015	[locus_tag=UV8b_3015] [protein=mitochondrial outer membrane 72Kda protein] [protein_id=KDB16085.1] [location=join(307871..308053,308190..309624,309751..309998)] [gbkey=CDS] - [JHTR01000012.1_prot_KDB16085.1_3015]	174.694	13.69	1	6	6	18	0.955786	0.985318	0.994999	0.970015	1.05115	1.03318	621	68.9178	5.71924	1.04027	0.222077
UV8b_4755	[locus_tag=UV8b_4755] [protein=hypothetical protein] [protein_id=KDB14484.1] [location=complement(join(434780..435285,435350..435854,435970..436096,436176..436207,436299..436457))] [gbkey=CDS] - [JHTR01000023.1_prot_KDB14484.1_4755]	174.059	23.76	1	9	9	13	1.01063	0.990734	0.999956	1.04249	1.00428	0.96761	442	48.1905	7.97217	1.00435	0.855177
UV8b_5037	[locus_tag=UV8b_5037] [protein=TPR domain-containing protein] [protein_id=KDB14048.1] [location=151264..152403] [gbkey=CDS] - [JHTR01000026.1_prot_KDB14048.1_5037]	174.041	20.84	1	6	6	11	1.04326	0.985415	0.969901	1.00622	0.950392	0.976307	379	42.1844	4.44971	0.978102	0.471251
UV8b_5684	[locus_tag=UV8b_5684] [protein=mitochondrial import inner membrane translocase subunit tim-54] [protein_id=KDB13586.1] [location=complement(401333..402766)] [gbkey=CDS] - [JHTR01000031.1_prot_KDB13586.1_5684]	173.98	17.61	1	7	7	9	0.977634	0.997159	0.982987	1.01759	0.992418	1.03882	477	52.871	7.31299	1.03078	0.106552
UV8b_3090	[locus_tag=UV8b_3090] [protein=putative cystathionine gamma-synthase] [protein_id=KDB16160.1] [location=join(531345..531527,531668..532414,532499..533236)] [gbkey=CDS] - [JHTR01000012.1_prot_KDB16160.1_3090]	173.711	19.46	1	9	9	12	0.909681	0.925456	0.997223	0.991899	1.18253	1.07891	555	61.9744	6.30322	1.14863	0.0840476
UV8b_2560	[locus_tag=UV8b_2560] [protein=60S ribosomal protein L34] [protein_id=KDB16525.1] [location=join(173249..173286,173386..173509,173764..173952)] [gbkey=CDS] - [JHTR01000010.1_prot_KDB16525.1_2560]	173.654	41.38	1	6	7	29	1.12353	1.12276	1.14606	0.862481	0.83068	0.871473	116	13.3144	10.9019	0.756005	4.54725e-05
UV8b_3820	[locus_tag=UV8b_3820] [protein=Eukaryotic translation initiation factor 3 subunit L] [protein_id=KDB15394.1] [location=join(365997..366305,366422..367459,367570..367653)] [gbkey=CDS] - [JHTR01000016.1_prot_KDB15394.1_3820]	173.58	14.5	1	7	7	18	1.02525	1.01738	1.01133	0.988968	0.940076	0.95405	476	54.9014	5.22412	0.944055	0.0195241
UV8b_4367	[locus_tag=UV8b_4367] [protein=pre-mRNA-processing protein prp40] [protein_id=KDB14844.1] [location=complement(join(353518..353649,353791..354804,354884..356239,356319..356453))] [gbkey=CDS] - [JHTR01000020.1_prot_KDB14844.1_4367]	173.42	11.73	1	8	8	12	0.94329	1.00981	1.058	0.96884	1.07211	1.01753	878	105.216	9.40771	1.01574	0.741468
UV8b_2199	[locus_tag=UV8b_2199] [protein=La domain family] [protein_id=KDB17107.1] [location=complement(join(693154..694043,694245..695568))] [gbkey=CDS] - [JHTR01000008.1_prot_KDB17107.1_2199]	173.416	19.13	1	11	11	18	1.0507	1.05086	1.03683	0.930576	0.952679	0.962462	737	80.0538	9.29053	0.906741	0.000750583
UV8b_5136	[locus_tag=UV8b_5136] [protein=hypothetical protein] [protein_id=KDB14147.1] [location=complement(476391..478244)] [gbkey=CDS] - [JHTR01000026.1_prot_KDB14147.1_5136]	173.292	7.62	1	3	3	7	0.975817	0.992729	1.0339	0.99364	1.04927	0.987655	617	68.2649	8.27979	1.00937	0.737849
UV8b_4121	[locus_tag=UV8b_4121] [protein=kinesin] [protein_id=KDB14975.1] [location=complement(join(212025..217186,217315..217378))] [gbkey=CDS] - [JHTR01000019.1_prot_KDB14975.1_4121]	172.068	5.46	1	6	6	10	0.995184	0.991087	0.933539	1.01706	0.991175	1.03865	1741	192.9	5.59229	1.04352	0.154614
UV8b_7600	[locus_tag=UV8b_7600] [protein=SCF complex subunit Skp1] [protein_id=KDB11558.1] [location=join(82568..82634,82720..82817,82874..83044,83129..83305)] [gbkey=CDS] - [JHTR01000066.1_prot_KDB11558.1_7600]	171.921	37.06	1	8	8	12	0.983886	0.997766	1.02443	0.961519	1.03744	1.00545	170	19.7717	4.61475	0.999445	0.983326
UV8b_2874	[locus_tag=UV8b_2874] [protein=zinc transporter protein] [protein_id=KDB16418.1] [location=569255..570388] [gbkey=CDS] - [JHTR01000011.1_prot_KDB16418.1_2874]	171.879	11.94	1	4	4	13	0.825219	0.955694	0.871394	1.14327	1.03215	1.09963	377	40.4809	6.41748	1.23479	0.014277
UV8b_3709	[locus_tag=UV8b_3709] [protein=1,3-beta-glucanosyltransferase Gel1] [protein_id=KDB15283.1] [location=join(30533..30659,30802..31462,31550..32135)] [gbkey=CDS] - [JHTR01000016.1_prot_KDB15283.1_3709]	171.511	11.16	1	5	5	10	0.946165	0.962552	0.972579	0.995863	1.04923	1.04127	457	49.1469	5.42725	1.07117	0.0202688
UV8b_2900	[locus_tag=UV8b_2900] [protein=FAD binding domain protein] [protein_id=KDB16444.1] [location=join(637235..637519,637663..637856,638059..638503,638621..639256)] [gbkey=CDS] - [JHTR01000011.1_prot_KDB16444.1_2900]	171.498	14.07	1	5	5	10	0.947017	0.967166	1.06193	0.948851	1.0826	1.04888	519	55.8143	8.73389	1.03502	0.551923
UV8b_7976	[locus_tag=UV8b_7976] [protein=pumilio domain-containing protein] [protein_id=KDB11165.1] [location=complement(join(44790..45169,45254..45809,45910..47610))] [gbkey=CDS] - [JHTR01000078.1_prot_KDB11165.1_7976]	171.385	10.82	1	7	7	10	0.971658	0.966329	0.970088	1.02789	1.04059	1.02115	878	95.6103	7.06396	1.06243	0.000513519
UV8b_6742	[locus_tag=UV8b_6742] [protein=DnaJ domain containing protein] [protein_id=KDB12379.1] [location=join(50314..50415,50461..50549,50791..51865)] [gbkey=CDS] - [JHTR01000045.1_prot_KDB12379.1_6742]	171.38	28.5	1	13	13	19	1.00394	1.00638	0.985592	1.00781	1.01916	1.00975	421	47.6042	6.354	1.01362	0.141352
UV8b_4349	[locus_tag=UV8b_4349] [protein=putative nucleoside hydrolase] [protein_id=KDB14826.1] [location=complement(297687..299507)] [gbkey=CDS] - [JHTR01000020.1_prot_KDB14826.1_4349]	170.893	13.04	1	6	6	16	1.01425	1.01966	0.988529	0.989372	0.970458	1.01493	606	69.9349	10.5796	0.984225	0.378684
UV8b_6710	[locus_tag=UV8b_6710] [protein=putative transcription regulatory protein] [protein_id=KDB12486.1] [location=join(210059..214381,215660..216286,216714..216821,216997..217097,217161..220236,220317..220838,221330..221359)] [gbkey=CDS] - [JHTR01000044.1_prot_KDB12486.1_6710]	170.73	5.23	1	15	15	18	0.966066	0.972858	1.02147	1.02732	1.049	1.0316	2928	328.978	7.50342	1.04983	0.0578961
UV8b_487	[locus_tag=UV8b_487] [protein=BSD domain-containing protein] [protein_id=KDB19096.1] [location=complement(join(2053358..2053653,2053754..2054498,2054564..2054752))] [gbkey=CDS] - [JHTR01000001.1_prot_KDB19096.1_487]	170.586	23.96	1	6	6	8	0.995003	1.01285	0.978434	0.998537	1.02678	1.03547	409	44.4726	4.84326	1.02495	0.171697
UV8b_975	[locus_tag=UV8b_975] [protein=putative rRNA biogenesis protein RRP5] [protein_id=KDB18127.1] [location=complement(join(433275..433850,433949..438373,438466..438900))] [gbkey=CDS] - [JHTR01000003.1_prot_KDB18127.1_975]	170.582	6.57	1	10	10	15	1.02306	1.03526	0.995064	0.987868	0.991145	0.968812	1811	198.746	7.03467	0.965427	0.063149
UV8b_4504	[locus_tag=UV8b_4504] [protein=small GTP-binding protein YPTI] [protein_id=KDB14648.1] [location=complement(join(234918..235115,235288..235422))] [gbkey=CDS] - [JHTR01000021.1_prot_KDB14648.1_4504]	170.256	42.73	1	5	5	10	1.03337	1.06407	0.974779	0.995161	0.963879	0.930185	110	11.9508	6.62451	0.940438	0.131252
UV8b_3334	[locus_tag=UV8b_3334] [protein=Epsin-like protein ent1/2] [protein_id=KDB15694.1] [location=join(148255..148327,148395..148464,148529..148749,148809..150094)] [gbkey=CDS] - [JHTR01000014.1_prot_KDB15694.1_3334]	170.081	14.94	1	6	6	8	0.90477	0.957479	1.02503	1.0111	1.13226	1.07786	549	61.8078	5.73193	1.11566	0.0872505
UV8b_6532	[locus_tag=UV8b_6532] [protein=putative phosphatidylserine decarboxylase] [protein_id=KDB12686.1] [location=join(255579..257745,257837..258588,258762..258929)] [gbkey=CDS] - [JHTR01000041.1_prot_KDB12686.1_6532]	170.004	10.7	1	10	11	23	0.967254	0.973466	1.0506	0.964792	1.09353	1.04438	1028	114.294	5.87158	1.03724	0.465761
UV8b_6557	[locus_tag=UV8b_6557] [protein=Sorting nexin mvp-1] [protein_id=KDB12536.1] [location=join(19873..20368,20758..21788,21957..22550,22807..23016)] [gbkey=CDS] - [JHTR01000042.1_prot_KDB12536.1_6557]	170	17.53	1	13	13	22	0.930398	0.96605	1.03546	0.972464	1.10643	1.0476	776	84.5427	6.354	1.06637	0.260618
UV8b_1231	[locus_tag=UV8b_1231] [protein=multidrug resistance-associated protein 1] [protein_id=KDB17864.1] [location=complement(join(300545..300864,300955..301023,301108..304270,304367..305182,305270..305581))] [gbkey=CDS] - [JHTR01000004.1_prot_KDB17864.1_1231]	169.895	4.49	1	7	7	13	0.980971	0.986536	0.973425	1.01621	0.991912	1.06426	1559	173.531	7.53271	1.0447	0.112313
UV8b_4140	[locus_tag=UV8b_4140] [protein=Multiprotein-bridging factor 1] [protein_id=KDB14994.1] [location=complement(join(261342..261647,261710..261868))] [gbkey=CDS] - [JHTR01000019.1_prot_KDB14994.1_4140]	169.833	25.32	1	4	4	9	1.07852	1.09687	0.939164	0.996741	0.845209	0.988496	154	16.2176	10.1401	0.908781	0.247478
UV8b_5389	[locus_tag=UV8b_5389] [protein=putative transport protein] [protein_id=KDB13782.1] [location=complement(join(258040..258198,258254..258364,258435..258605,258658..258877,258927..260167,260228..261217))] [gbkey=CDS] - [JHTR01000029.1_prot_KDB13782.1_5389]	169.141	6.13	1	5	5	8	0.99667	1.01398	1.05635	0.969562	1.02045	0.977073	963	107.413	5.08447	0.967422	0.234015
UV8b_1594	[locus_tag=UV8b_1594] [protein=anaphase-promoting complex subunit Apc5] [protein_id=KDB17710.1] [location=complement(join(742212..742360,742449..742541,742671..742745,742888..742915))] [gbkey=CDS] - [JHTR01000005.1_prot_KDB17710.1_1594]	168.933	27.19	1	5	5	13	1.03627	1.05521	1.0138	0.961851	0.965757	0.958129	114	13.0719	8.60205	0.929299	0.00384881
UV8b_316	[locus_tag=UV8b_316] [protein=C-4 sterol methyl oxidase] [protein_id=KDB18925.1] [location=complement(join(1068001..1068801,1068953..1069072))] [gbkey=CDS] - [JHTR01000001.1_prot_KDB18925.1_316]	168.927	13.4	1	4	4	10	1.04933	0.981787	1.04222	0.94014	0.955461	0.989663	306	35.6709	7.72314	0.938806	0.0730961
UV8b_4329	[locus_tag=UV8b_4329] [protein=IdgA domain protein] [protein_id=KDB14806.1] [location=join(247763..248254,248393..249066,249145..249423,249495..250479)] [gbkey=CDS] - [JHTR01000020.1_prot_KDB14806.1_4329]	168.444	8.78	1	5	5	7	1.02966	0.974064	1.05234	1.00793	0.938686	0.995616	809	86.4248	8.22119	0.96275	0.295436
UV8b_7349	[locus_tag=UV8b_7349] [protein=putative translation initiation factor eIF3 subunit] [protein_id=KDB11836.1] [location=join(156898..156926,156994..157636,157696..157920)] [gbkey=CDS] - [JHTR01000058.1_prot_KDB11836.1_7349]	168.124	36.91	3	9	10	27	1.03169	1.07314	1.08221	0.895231	0.956161	0.926986	298	32.5172	8.88037	0.871775	0.00439125
UV8b_2033	[locus_tag=UV8b_2033] [protein=Importin-beta domain containing protein] [protein_id=KDB16941.1] [location=join(106161..106312,106366..106378,106532..106813,106927..107017,107079..108362,108502..109433,110347..110502,111500..111631)] [gbkey=CDS] - [JHTR01000008.1_prot_KDB16941.1_2033]	168.089	11.65	1	9	9	15	1.04922	0.99907	0.969332	1.00884	0.98845	0.972831	1013	113.024	5.2876	0.98426	0.56884
UV8b_3888	[locus_tag=UV8b_3888] [protein=pre-mRNA splicing factor SYF1] [protein_id=KDB15225.1] [location=complement(join(32251..34470,34572..34688,34756..34797))] [gbkey=CDS] - [JHTR01000017.1_prot_KDB15225.1_3888]	167.652	8.08	1	6	6	11	0.987287	0.97725	0.909505	1.04792	1.02415	1.04407	792	91.6104	6.01123	1.08424	0.0340841
UV8b_2548	[locus_tag=UV8b_2548] [protein=uricase] [protein_id=KDB16513.1] [location=join(143757..144582,144770..144876)] [gbkey=CDS] - [JHTR01000010.1_prot_KDB16513.1_2548]	167.431	20.32	1	6	6	13	0.922403	0.955662	1.03279	0.98198	1.06152	1.03011	310	34.4924	6.80029	1.05591	0.246977
UV8b_3751	[locus_tag=UV8b_3751] [protein=short chain dehydrogenase reductase family protein] [protein_id=KDB15325.1] [location=complement(155050..155892)] [gbkey=CDS] - [JHTR01000016.1_prot_KDB15325.1_3751]	167.292	21.43	1	4	4	7	0.967825	1.01939	1.00929	0.987349	1.01617	0.960834	280	29.7763	7.59131	0.98927	0.65806
UV8b_3727	[locus_tag=UV8b_3727] [protein=putative ANP1 protein] [protein_id=KDB15301.1] [location=join(87956..88047,88223..88851,88910..88957,89020..89100,89185..89319,89385..89533)] [gbkey=CDS] - [JHTR01000016.1_prot_KDB15301.1_3727]	166.968	18.04	1	8	8	15	0.959358	0.997961	0.998409	1.003	1.05831	1.00349	377	43.1458	6.59521	1.0369	0.180815
UV8b_2204	[locus_tag=UV8b_2204] [protein=putative choline/ethanolamine kinase] [protein_id=KDB17112.1] [location=join(716230..716943,717030..717527)] [gbkey=CDS] - [JHTR01000008.1_prot_KDB17112.1_2204]	166.872	31.76	2	10	10	19	0.995691	1.02215	1.1093	0.9212	1.00207	0.975454	403	45.2728	5.73193	0.926955	0.142355
UV8b_3125	[locus_tag=UV8b_3125] [protein=ankyrin repeat domain containing protein] [protein_id=KDB16195.1] [location=645523..648231] [gbkey=CDS] - [JHTR01000012.1_prot_KDB16195.1_3125]	166.493	15.19	1	10	10	19	1.11273	1.10916	1.08407	0.915658	0.863597	0.873646	902	97.1579	6.93213	0.802461	0.000287172
UV8b_867	[locus_tag=UV8b_867] [protein=DUF500 domain-containing protein] [protein_id=KDB18019.1] [location=complement(join(85887..85947,86153..87260,87392..87434))] [gbkey=CDS] - [JHTR01000003.1_prot_KDB18019.1_867]	166.482	14.64	1	5	5	11	1.01904	0.966446	0.941878	1.0411	0.965661	1.02828	403	42.3644	9.24658	1.03678	0.332384
UV8b_4841	[locus_tag=UV8b_4841] [protein=vacuolar protein sorting-associated protein vps13] [protein_id=KDB14246.1] [location=join(182050..188501,188569..191719)] [gbkey=CDS] - [JHTR01000024.1_prot_KDB14246.1_4841]	166.322	5.91	1	13	13	14	0.958748	0.95547	0.976693	1.0583	1.02051	1.04727	3200	358.5	5.87158	1.08135	0.0038291
UV8b_241	[locus_tag=UV8b_241] [protein=glutathione peroxidase-like protein] [protein_id=KDB18850.1] [location=join(749941..749983,750079..750545)] [gbkey=CDS] - [JHTR01000001.1_prot_KDB18850.1_241]	166.149	43.79	1	6	6	20	0.976069	0.998995	0.925128	1.0298	0.995975	1.04679	169	19.1697	8.19189	1.05943	0.0955558
UV8b_3670	[locus_tag=UV8b_3670] [protein=endoplasmic oxidoreductin-1 precursor] [protein_id=KDB15639.1] [location=complement(join(516100..516217,516337..518018,518169..518261))] [gbkey=CDS] - [JHTR01000015.1_prot_KDB15639.1_3670]	166.021	9.52	1	4	4	7	0.955296	0.966883	1.00979	1.02298	1.03097	1.03136	630	70.3943	5.89697	1.0523	0.0382895
UV8b_2090	[locus_tag=UV8b_2090] [protein=polyketide synthase] [protein_id=KDB16998.1] [location=complement(join(326885..328068,328153..328510))] [gbkey=CDS] - [JHTR01000008.1_prot_KDB16998.1_2090]	165.949	16.18	1	7	7	23	0.746816	0.758069	0.719136	1.25571	1.32606	1.18642	513	56.6561	5.79541	1.69432	0.000253113
UV8b_4897	[locus_tag=UV8b_4897] [protein=GTPase-activating protein GYP5] [protein_id=KDB14302.1] [location=join(404533..404628,404725..405064,405138..406411,406479..407420,407517..407579)] [gbkey=CDS] - [JHTR01000024.1_prot_KDB14302.1_4897]	165.687	9.96	1	7	7	8	0.982537	0.980484	0.982355	1.0113	1.03669	1.05739	904	100.014	5.75732	1.05432	0.0161821
UV8b_7480	[locus_tag=UV8b_7480] [protein=CBS domain containing protein] [protein_id=KDB11694.1] [location=join(115230..115343,115443..115906,115984..116144,116250..116353,116436..116543)] [gbkey=CDS] - [JHTR01000062.1_prot_KDB11694.1_7480]	165.102	4.43	1	1	1	5	1.0677	1.04428	0.982576	0.999819	0.932078	0.949503	316	34.5405	4.76709	0.931117	0.0941708
UV8b_1800	[locus_tag=UV8b_1800] [protein=vacuolar ATP synthase subunit E] [protein_id=KDB17203.1] [location=join(195584..195613,195773..196281,196354..196504)] [gbkey=CDS] - [JHTR01000007.1_prot_KDB17203.1_1800]	165.038	18.78	1	4	4	12	0.979005	0.992906	0.995238	1.01735	1.07045	1.02899	229	25.8505	7.25439	1.05043	0.0418403
UV8b_4580	[locus_tag=UV8b_4580] [protein=transformer-SR ribonucleoprotein] [protein_id=KDB14530.1] [location=complement(join(138823..139223,139278..139624,139708..139819,139917..139968))] [gbkey=CDS] - [JHTR01000022.1_prot_KDB14530.1_4580]	165.037	23.1	1	8	9	19	0.955153	1.00547	1.04357	0.967279	1.05997	1.01874	303	34.9766	8.68994	1.01391	0.726118
UV8b_7423	[locus_tag=UV8b_7423] [protein=pyrroline-5-carboxylate reductase] [protein_id=KDB11714.1] [location=join(68921..68969,69026..69969)] [gbkey=CDS] - [JHTR01000061.1_prot_KDB11714.1_7423]	164.823	10.3	1	2	2	5	1.00632	0.988699	0.992099	1.02164	0.977017	1.00415	330	34.4217	8.33838	1.00525	0.72875
UV8b_5519	[locus_tag=UV8b_5519] [protein=putative glutathione S-transferase family protein] [protein_id=KDB13687.1] [location=join(284116..284694,284785..284976)] [gbkey=CDS] - [JHTR01000030.1_prot_KDB13687.1_5519]	164.803	25	1	6	6	11	0.971286	0.998246	1.00753	1.02714	1.01311	1.00708	256	28.4716	6.354	1.02361	0.131576
UV8b_6241	[locus_tag=UV8b_6241] [protein=Dolichyl-phosphate-mannose-protein mannosyltransferase containing protein] [protein_id=KDB12880.1] [location=complement(join(46297..46779,46882..48635,48716..49005,49092..49312))] [gbkey=CDS] - [JHTR01000038.1_prot_KDB12880.1_6241]	164.769	13.11	1	9	9	20	1.04808	1.03711	1.04482	0.967508	0.944622	0.965386	915	102.514	7.26904	0.919331	0.000459809
UV8b_1449	[locus_tag=UV8b_1449] [protein=hypothetical protein] [protein_id=KDB17565.1] [location=complement(join(281035..281480,281613..281994))] [gbkey=CDS] - [JHTR01000005.1_prot_KDB17565.1_1449]	164.695	18.91	1	5	5	10	0.954988	0.965544	1.03932	0.986101	1.0675	1.04614	275	30.8525	5.23682	1.04726	0.265148
UV8b_54	[locus_tag=UV8b_54] [protein=acetamidase] [protein_id=KDB18663.1] [location=complement(join(199305..199401,199528..199751,199818..199910,200005..200075,200150..200290,200375..201443,201497..201541,201657..201968))] [gbkey=CDS] - [JHTR01000001.1_prot_KDB18663.1_54]	164.161	12.15	1	5	6	11	1.12598	1.08349	1.12635	0.898249	0.850966	0.864374	683	74.5106	7.00537	0.783491	0.000273442
UV8b_2931	[locus_tag=UV8b_2931] [protein=MYG1 protein] [protein_id=KDB16001.1] [location=complement(75715..76758)] [gbkey=CDS] - [JHTR01000012.1_prot_KDB16001.1_2931]	163.786	24.78	1	5	5	9	1.0285	0.994957	0.908041	1.08294	0.943649	1.01155	347	38.4383	6.13818	1.03638	0.545607
UV8b_899	[locus_tag=UV8b_899] [protein=ATPase components of ABC transporter] [protein_id=KDB18051.1] [location=join(181845..181901,181988..182059,182150..183082,183152..183232,183316..184701)] [gbkey=CDS] - [JHTR01000003.1_prot_KDB18051.1_899]	163.779	7.84	1	7	7	10	1.05941	1.05028	0.994928	0.965164	0.98361	0.954782	842	92.0682	6.17627	0.935238	0.0373301
UV8b_5600	[locus_tag=UV8b_5600] [protein=acetyl-CoA synthetase-like protein] [protein_id=KDB13502.1] [location=complement(join(122770..122898,123052..123250,123286..124282,124692..125294,125451..125538,126332..127521,127703..128105))] [gbkey=CDS] - [JHTR01000031.1_prot_KDB13502.1_5600]	163.356	1.91	1	2	2	5	1.05197	1.03199	1.01327	0.902961	0.98313	1.03035	1202	130.143	6.72705	0.941633	0.195593
UV8b_4287	[locus_tag=UV8b_4287] [protein=hypothetical protein] [protein_id=KDB14764.1] [location=join(124186..124523,124680..126327)] [gbkey=CDS] - [JHTR01000020.1_prot_KDB14764.1_4287]	163.155	23.15	2	11	11	13	0.952711	0.999958	0.983202	0.958128	1.05537	1.00353	661	73.6348	6.20166	1.02764	0.43632
UV8b_5557	[locus_tag=UV8b_5557] [protein=eukaryotic Sm and Sm-like (LSm) protein] [protein_id=KDB13459.1] [location=complement(join(10821..10954,11017..11107,11164..11460,11521..11592,11679..11687,11751..11774))] [gbkey=CDS] - [JHTR01000031.1_prot_KDB13459.1_5557]	162.972	28.37	1	5	5	9	1.02432	1.01516	0.89232	1.08836	0.95147	1.01552	208	20.9678	11.1655	1.04215	0.517454
UV8b_8366	[locus_tag=UV8b_8366] [protein=ubiquitin-conjugating enzyme] [protein_id=KDB10787.1] [location=11630..12328] [gbkey=CDS] - [JHTR01000125.1_prot_KDB10787.1_8366]	162.956	9.05	1	1	1	3	0.895916	0.835319	0.962689	1.07548	1.1254	1.05511	232	25.1391	8.03076	1.20864	0.0114249
UV8b_1465	[locus_tag=UV8b_1465] [protein=PAB1 binding protein (Pbp1)] [protein_id=KDB17581.1] [location=complement(join(319826..321989,322045..322427))] [gbkey=CDS] - [JHTR01000005.1_prot_KDB17581.1_1465]	162.528	14.03	1	10	10	15	1.0274	1.00663	1.04946	0.987666	0.963598	0.996682	848	92.0844	9.68604	0.956042	0.0461541
UV8b_7822	[locus_tag=UV8b_7822] [protein=putative importin] [protein_id=KDB11360.1] [location=join(98197..98298,98361..100979,101078..101179)] [gbkey=CDS] - [JHTR01000073.1_prot_KDB11360.1_7822]	161.853	14.15	1	11	11	17	1.00696	1.03656	0.986073	0.971722	1.00618	0.965874	940	104.32	4.95752	0.971673	0.212494
UV8b_8286	[locus_tag=UV8b_8286] [protein=putative dynein light chain (Tctex1)] [protein_id=KDB10882.1] [location=39185..39523] [gbkey=CDS] - [JHTR01000102.1_prot_KDB10882.1_8286]	161.565	83.04	1	7	7	14	0.953292	0.973584	1.00712	1.00399	1.11091	1.00977	112	12.122	8.1626	1.06499	0.170595
UV8b_1008	[locus_tag=UV8b_1008] [protein=trehalose phosphate synthase] [protein_id=KDB18160.1] [location=join(560942..560964,561045..563704,563846..563883)] [gbkey=CDS] - [JHTR01000003.1_prot_KDB18160.1_1008]	161.515	10.15	1	8	8	10	0.914863	0.984156	0.988714	0.988621	1.07725	1.03391	906	102.448	6.82959	1.07343	0.113625
UV8b_5051	[locus_tag=UV8b_5051] [protein=annexin ANXC4] [protein_id=KDB14062.1] [location=complement(join(203791..204111,204202..206469))] [gbkey=CDS] - [JHTR01000026.1_prot_KDB14062.1_5051]	161.263	11.83	1	10	10	14	0.938731	0.944815	0.883265	1.11202	1.06621	1.11149	862	97.6106	9.33447	1.18899	0.00215232
UV8b_3359	[locus_tag=UV8b_3359] [protein=thiosulfate sulfurtransferase] [protein_id=KDB15719.1] [location=join(240020..240975,241058..241115)] [gbkey=CDS] - [JHTR01000014.1_prot_KDB15719.1_3359]	161.177	24.63	1	9	9	15	0.957298	1.01061	1.03649	0.973152	1.01215	0.97436	337	37.3361	6.7417	0.985111	0.604982
UV8b_6112	[locus_tag=UV8b_6112] [protein=protein kinase gsk3] [protein_id=KDB13112.1] [location=join(293340..293715,293827..293960)] [gbkey=CDS] - [JHTR01000036.1_prot_KDB13112.1_6112]	160.605	29.59	1	4	4	9	1.00272	1.00394	1.02157	0.99989	1.01685	1.00813	169	19.0649	6.27783	0.998893	0.893174
UV8b_3610	[locus_tag=UV8b_3610] [protein=PBSP domain protein] [protein_id=KDB15579.1] [location=join(336884..336947,337011..338014)] [gbkey=CDS] - [JHTR01000015.1_prot_KDB15579.1_3610]	160.382	15.21	1	4	4	8	1.08639	1.00051	1.06635	0.987529	0.920375	0.978542	355	39.9121	7.41553	0.91539	0.0562568
UV8b_4132	[locus_tag=UV8b_4132] [protein=PX domain-containing protein] [protein_id=KDB14986.1] [location=243841..247083] [gbkey=CDS] - [JHTR01000019.1_prot_KDB14986.1_4132]	160.249	3.33	1	3	3	4	1.00193	0.953364	1.08629	0.96956	0.988658	1.01981	1080	114.885	6.26514	0.979105	0.636624
UV8b_4072	[locus_tag=UV8b_4072] [protein=glycerol kinase] [protein_id=KDB14926.1] [location=complement(join(52097..52336,52473..53592,53681..53820))] [gbkey=CDS] - [JHTR01000019.1_prot_KDB14926.1_4072]	159.888	10.62	1	5	5	11	1.0427	1.08843	1.03009	0.911659	0.960113	0.914328	499	54.3775	7.10791	0.881337	0.00618205
UV8b_6295	[locus_tag=UV8b_6295] [protein=oxidoreductase] [protein_id=KDB12801.1] [location=join(18326..18630,18765..19074,19182..19237,19313..19421,19530..19565)] [gbkey=CDS] - [JHTR01000039.1_prot_KDB12801.1_6295]	159.175	11.44	1	3	3	4	0.941896	1.02043	1.01433	0.984823	1.02291	1.03759	271	29.1272	7.98682	1.02307	0.484202
UV8b_7026	[locus_tag=UV8b_7026] [protein=putative esterase] [protein_id=KDB12123.1] [location=111135..112193] [gbkey=CDS] - [JHTR01000050.1_prot_KDB12123.1_7026]	159.151	15.63	1	3	3	7	1.01708	0.955825	0.928206	1.07293	1.00209	1.0465	352	38.6287	6.11279	1.07597	0.0928294
UV8b_1432	[locus_tag=UV8b_1432] [protein=putative cytochrome b5] [protein_id=KDB17548.1] [location=join(210619..210737,210974..211100,211326..211505)] [gbkey=CDS] - [JHTR01000005.1_prot_KDB17548.1_1432]	158.568	13.48	1	3	3	16	1.02255	1.046	1.0657	0.959126	0.998057	0.928453	141	15.1074	4.729	0.920677	0.0249327
UV8b_5829	[locus_tag=UV8b_5829] [protein=40S ribosomal protein S18] [protein_id=KDB13450.1] [location=join(429184..429222,429419..429549,429686..429986)] [gbkey=CDS] - [JHTR01000032.1_prot_KDB13450.1_5829]	158.497	42.31	1	10	12	31	1.04731	1.07003	1.0786	0.940393	0.963339	0.911469	156	17.8648	10.5503	0.880866	0.00199159
UV8b_1392	[locus_tag=UV8b_1392] [protein=putative glutamate decarboxylase] [protein_id=KDB17508.1] [location=complement(join(84462..85589,85734..85778,85912..86205,86353..86448))] [gbkey=CDS] - [JHTR01000005.1_prot_KDB17508.1_1392]	158.45	7.5	1	3	3	5	1.03617	1.04617	1.0237	0.988224	0.939327	0.948203	520	55.6612	7.44482	0.925859	0.00941045
UV8b_6777	[locus_tag=UV8b_6777] [protein=dimeric alpha-beta barrel] [protein_id=KDB12414.1] [location=complement(join(144037..144078,144182..144292,144384..144538,144642..144697,144773..144948))] [gbkey=CDS] - [JHTR01000045.1_prot_KDB12414.1_6777]	158.374	14.53	1	2	2	6	0.953617	0.982943	0.990304	1.00077	1.07974	1.02385	179	19.5824	10.4331	1.06064	0.0850676
UV8b_4114	[locus_tag=UV8b_4114] [protein=aconitate hydratase] [protein_id=KDB14968.1] [location=join(190051..190095,190184..192619)] [gbkey=CDS] - [JHTR01000019.1_prot_KDB14968.1_4114]	157.773	14.16	1	7	9	14	1.00019	1.00129	1.037	0.984996	1.0742	0.988976	826	87.5117	7.2251	1.00319	0.923312
UV8b_5674	[locus_tag=UV8b_5674] [protein=HMG box protein] [protein_id=KDB13576.1] [location=complement(join(364995..365429,365636..366399,366976..367133,367241..367260))] [gbkey=CDS] - [JHTR01000031.1_prot_KDB13576.1_5674]	157.576	12.23	1	10	11	28	0.950123	0.983139	0.977102	1.00131	1.09	1.05795	458	50.6862	10.7407	1.08208	0.0459419
UV8b_2988	[locus_tag=UV8b_2988] [protein=hypothetical protein] [protein_id=KDB16058.1] [location=join(244157..244300,244378..246850,246894..248171,248307..250387)] [gbkey=CDS] - [JHTR01000012.1_prot_KDB16058.1_2988]	157.404	4.67	2	7	8	9	0.962328	1.0058	1.02585	0.992998	1.06748	0.987812	1991	219.228	5.75732	1.01814	0.600058
UV8b_1226	[locus_tag=UV8b_1226] [protein=CCR4-NOT transcription complex subunit 7] [protein_id=KDB17859.1] [location=join(278829..279263,279391..280425)] [gbkey=CDS] - [JHTR01000004.1_prot_KDB17859.1_1226]	157.204	23.11	1	7	7	8	1.00783	0.975168	0.946215	1.10687	0.982967	1.04312	489	52.4867	7.07861	1.06955	0.164407
UV8b_7950	[locus_tag=UV8b_7950] [protein=dienelactone hydrolase] [protein_id=KDB11217.1] [location=complement(join(100845..100939,101030..101705,102182..102301))] [gbkey=CDS] - [JHTR01000077.1_prot_KDB11217.1_7950]	157.119	5.74	1	1	1	3	0.942073	1.00511	1.11586	0.951248	1.12799	1.01153	296	30.5952	4.95752	1.00905	0.904842
UV8b_2820	[locus_tag=UV8b_2820] [protein=DUF1682 domain protein] [protein_id=KDB16364.1] [location=complement(join(434787..436018,436088..436163))] [gbkey=CDS] - [JHTR01000011.1_prot_KDB16364.1_2820]	157.083	15.86	1	6	7	13	0.996493	1.01447	0.977456	0.988586	1.03971	0.999094	435	48.5685	8.79248	1.01304	0.529599
UV8b_735	[locus_tag=UV8b_735] [protein=anthranilate synthase component 1] [protein_id=KDB18493.1] [location=complement(join(690310..690452,690563..690718,690763..692206,692325..692336))] [gbkey=CDS] - [JHTR01000002.1_prot_KDB18493.1_735]	157.068	13.53	1	9	9	15	0.999467	1.04798	1.0394	0.944901	0.995017	0.968857	584	63.7597	5.92236	0.942315	0.046257
UV8b_7611	[locus_tag=UV8b_7611] [protein=cleavage and polyadenylation specific factor 5] [protein_id=KDB11569.1] [location=complement(142589..143158)] [gbkey=CDS] - [JHTR01000066.1_prot_KDB11569.1_7611]	157.027	20.11	1	5	5	15	0.989685	1.00437	0.961499	1.07081	0.998863	0.974064	189	21.7889	6.13818	1.02984	0.405198
UV8b_6567	[locus_tag=UV8b_6567] [protein=cell wall glucanase (Utr2)] [protein_id=KDB12546.1] [location=join(43278..43383,43581..44887)] [gbkey=CDS] - [JHTR01000042.1_prot_KDB12546.1_6567]	156.946	4.68	1	1	1	3	0.945604	0.958295	0.950401	1.05034	1.05317	1.05471	470	48.4277	5.94775	1.10648	1.3244e-05
UV8b_5430	[locus_tag=UV8b_5430] [protein=phenylalanyl-tRNA synthetase alpha chain] [protein_id=KDB13823.1] [location=join(446977..447352,447430..447449,447545..447906,447972..448050,448149..448592,448649..448715,448798..448830,448945..449023,449090..449240)] [gbkey=CDS] - [JHTR01000029.1_prot_KDB13823.1_5430]	156.94	13.43	1	6	7	13	1.00219	0.989161	1.11338	0.9106	1.05238	0.990537	536	60.2306	8.30908	0.951297	0.425764
UV8b_2183	[locus_tag=UV8b_2183] [protein=nucleolar GTP-binding protein] [protein_id=KDB17091.1] [location=join(637036..637165,637260..637845,637963..639172,639276..639317)] [gbkey=CDS] - [JHTR01000008.1_prot_KDB17091.1_2183]	156.064	8.4	1	4	6	11	1.04819	1.00771	1.02744	0.965568	0.961087	0.958274	655	75.044	8.92432	0.93565	0.00509932
UV8b_2589	[locus_tag=UV8b_2589] [protein=plasma membrane phosphatase required for sodium stress response] [protein_id=KDB16554.1] [location=complement(join(258427..258461,258534..258629,258734..258941,260444..260725,260784..260933,260990..261982))] [gbkey=CDS] - [JHTR01000010.1_prot_KDB16554.1_2589]	156.053	7.16	1	2	2	6	0.912019	0.953914	1.01926	0.96398	1.03428	1.08906	587	62.4184	6.12549	1.07006	0.231418
UV8b_1024	[locus_tag=UV8b_1024] [protein=bcp1] [protein_id=KDB18176.1] [location=complement(join(600043..600810,600878..600970))] [gbkey=CDS] - [JHTR01000003.1_prot_KDB18176.1_1024]	155.804	25.87	1	5	5	13	0.969841	0.981455	0.992838	0.99209	1.03067	1.05414	286	32.0081	4.90674	1.0451	0.083234
UV8b_7134	[locus_tag=UV8b_7134] [protein=secretion pathway protein Sls2/Rcy1] [protein_id=KDB11991.1] [location=join(19869..20015,20105..20213,20323..23231)] [gbkey=CDS] - [JHTR01000053.1_prot_KDB11991.1_7134]	155.545	8.82	1	7	7	8	0.986769	1.01984	1.02293	0.998042	1.02928	0.988353	1054	114.182	6.55127	0.995422	0.798257
UV8b_3447	[locus_tag=UV8b_3447] [protein=transcriptional activator srcap-like protein] [protein_id=KDB15807.1] [location=join(514881..516571,516643..522193)] [gbkey=CDS] - [JHTR01000014.1_prot_KDB15807.1_3447]	154.696	7.71	1	14	15	17	0.986504	1.00826	0.970806	1.04568	1.00742	1.02724	2413	264.334	6.07471	1.0387	0.0689815
UV8b_8133	[locus_tag=UV8b_8133] [protein=3-hydroxyisobutyrate dehydrogenase] [protein_id=KDB11005.1] [location=join(28616..29044,29116..29136,29198..29260,29344..29754,29844..31628)] [gbkey=CDS] - [JHTR01000083.1_prot_KDB11005.1_8133]	154.491	10.86	1	6	6	8	0.839151	0.87135	0.953411	1.08025	1.21096	1.13568	902	100.213	8.17725	1.28641	0.00751318
UV8b_6802	[locus_tag=UV8b_6802] [protein=putative ATP binding protein] [protein_id=KDB12315.1] [location=join(48686..48733,48828..49706)] [gbkey=CDS] - [JHTR01000046.1_prot_KDB12315.1_6802]	154.233	18.83	1	3	3	4	0.891276	0.967782	0.970513	0.981589	1.06254	1.14505	308	34.335	4.62744	1.12709	0.0900606
UV8b_450	[locus_tag=UV8b_450] [protein=calcium permease] [protein_id=KDB19059.1] [location=join(1945570..1945750,1945895..1948689,1948787..1949215)] [gbkey=CDS] - [JHTR01000001.1_prot_KDB19059.1_450]	153.997	3.79	1	3	3	6	0.948569	0.971022	0.969825	1.0574	0.964028	1.05944	1134	123.942	7.03467	1.06626	0.119408
UV8b_8410	[locus_tag=UV8b_8410] [protein=succinate dehydrogenase flavoprotein subunit precursor] [protein_id=KDB10743.1] [location=55..294] [gbkey=CDS] - [JHTR01000264.1_prot_KDB10743.1_8410]	153.977	49.37	1	4	4	12	0.932904	0.966184	1.00423	1.03593	1.10639	1.06079	79	8.9535	9.43701	1.10326	0.0266045
UV8b_5227	[locus_tag=UV8b_5227] [protein=hypothetical protein] [protein_id=KDB13893.1] [location=join(201731..201891,201978..202005,202134..202638,202725..203125,203196..203396)] [gbkey=CDS] - [JHTR01000028.1_prot_KDB13893.1_5227]	153.878	20.19	1	6	6	10	0.996491	1.02122	1.00485	1.00559	0.990045	0.974303	431	46.244	5.59229	0.982589	0.204705
UV8b_6505	[locus_tag=UV8b_6505] [protein=Transcription elongation factor spt-6] [protein_id=KDB12659.1] [location=join(159586..159759,159829..160044,160111..163732,163853..164106)] [gbkey=CDS] - [JHTR01000041.1_prot_KDB12659.1_6505]	153.295	14.57	1	15	15	26	0.973247	0.988829	0.993943	1.00961	1.04069	1.01467	1421	163.935	4.88135	1.03686	0.0339345
UV8b_2574	[locus_tag=UV8b_2574] [protein=ABC transporter (Adp1)] [protein_id=KDB16539.1] [location=complement(217876..220593)] [gbkey=CDS] - [JHTR01000010.1_prot_KDB16539.1_2574]	153.13	7.85	1	7	7	11	0.929814	0.994555	0.990003	0.988523	1.0648	1.03503	905	98.8982	6.53662	1.0597	0.129668
UV8b_7212	[locus_tag=UV8b_7212] [protein=mannose phospho-dolichol synthase] [protein_id=KDB11983.1] [location=complement(join(185874..186492,186716..186828))] [gbkey=CDS] - [JHTR01000054.1_prot_KDB11983.1_7212]	153.05	28.81	1	5	5	10	1.07015	0.995177	1.03526	0.984027	0.942912	0.963281	243	26.8658	8.85107	0.932152	0.046914
UV8b_8269	[locus_tag=UV8b_8269] [protein=nuclear pore complex subunit Nup133] [protein_id=KDB10865.1] [location=complement(join(4331..4665,4810..8229,8319..8388,8503..8835))] [gbkey=CDS] - [JHTR01000102.1_prot_KDB10865.1_8269]	152.935	6.86	1	6	6	8	1.04209	0.975781	0.93518	1.04836	0.984353	1.01487	1385	153.342	6.53662	1.03201	0.433508
UV8b_776	[locus_tag=UV8b_776] [protein=glycoside hydrolase family 63] [protein_id=KDB18534.1] [location=complement(join(834513..834870,834979..836223,836311..836770,836908..837535,837600..837756,837816..837933,837996..838034,838106..838229))] [gbkey=CDS] - [JHTR01000002.1_prot_KDB18534.1_776]	152.641	14.01	1	12	12	18	1.00973	0.966438	0.938406	1.0383	1.02179	1.05213	1042	121.47	6.20166	1.06781	0.0430194
UV8b_7377	[locus_tag=UV8b_7377] [protein=glutamine synthetase] [protein_id=KDB11789.1] [location=join(101837..102305,102398..103383)] [gbkey=CDS] - [JHTR01000059.1_prot_KDB11789.1_7377]	152.484	14.26	1	4	4	7	0.955211	0.954582	0.998229	1.00533	1.10224	1.03566	484	53.3978	6.84424	1.08088	0.0707821
UV8b_1478	[locus_tag=UV8b_1478] [protein=NifU-like protein] [protein_id=KDB17594.1] [location=join(356200..356988,357057..357167)] [gbkey=CDS] - [JHTR01000005.1_prot_KDB17594.1_1478]	152.363	23.41	1	4	4	7	0.968226	0.98556	0.937045	1.12682	1.02036	1.02531	299	33.196	6.65381	1.09743	0.0664248
UV8b_4743	[locus_tag=UV8b_4743] [protein=mannosyl-oligosaccharide 1,2-alpha-mannosidase] [protein_id=KDB14472.1] [location=complement(join(403867..404061,404159..405498,405593..406148))] [gbkey=CDS] - [JHTR01000023.1_prot_KDB14472.1_4743]	152.324	10.78	1	5	6	7	0.986484	0.984493	0.98711	1.04108	1.0275	1.03077	696	78.7402	5.89697	1.04776	0.000349731
UV8b_1846	[locus_tag=UV8b_1846] [protein=hypothetical protein] [protein_id=KDB17249.1] [location=complement(join(344503..344536,344592..344719,344780..344833))] [gbkey=CDS] - [JHTR01000007.1_prot_KDB17249.1_1846]	150.862	52.11	1	5	5	10	0.97556	0.981443	0.94195	1.06435	1.02777	1.02144	71	7.43774	9.08545	1.07403	0.017004
UV8b_5792	[locus_tag=UV8b_5792] [protein=putative mitochondrial protein] [protein_id=KDB13413.1] [location=complement(join(301798..302335,302425..302849,302928..302957))] [gbkey=CDS] - [JHTR01000032.1_prot_KDB13413.1_5792]	150.433	9.09	1	3	3	11	1.03301	0.989803	0.897149	1.08827	0.999929	0.999029	330	35.8168	10.1108	1.05728	0.32577
UV8b_3363	[locus_tag=UV8b_3363] [protein=zinc homeostasis factor 1] [protein_id=KDB15723.1] [location=join(265532..265657,265778..265861,265959..267551)] [gbkey=CDS] - [JHTR01000014.1_prot_KDB15723.1_3363]	150.433	3.5	1	2	2	5	0.943738	0.946313	0.961921	1.04233	1.04073	1.09351	600	64.1648	6.7124	1.11382	0.00404744
UV8b_8001	[locus_tag=UV8b_8001] [protein=PX domain protein] [protein_id=KDB11190.1] [location=join(136558..136711,136882..137111,137168..137765,137823..137947,138022..138355,138445..139238,139366..140016)] [gbkey=CDS] - [JHTR01000078.1_prot_KDB11190.1_8001]	150.365	10.72	1	11	12	19	0.991132	0.990188	0.88926	1.07539	1.00606	1.03512	961	108.862	6.72705	1.0857	0.105412
UV8b_4497	[locus_tag=UV8b_4497] [protein=hypothetical protein] [protein_id=KDB14641.1] [location=complement(join(206074..206604,206709..206987))] [gbkey=CDS] - [JHTR01000021.1_prot_KDB14641.1_4497]	150.284	17.84	1	4	4	7	0.969394	0.958795	0.952976	1.0482	1.03069	1.07819	269	30.2675	5.45264	1.09576	0.00330945
UV8b_8159	[locus_tag=UV8b_8159] [protein=vacuolar protein sorting-associated protein 35] [protein_id=KDB10984.1] [location=join(24858..24991,25046..27071,27298..27318)] [gbkey=CDS] - [JHTR01000085.1_prot_KDB10984.1_8159]	149.774	14.19	1	8	8	12	0.979638	0.97902	1.00067	1.01213	1.01191	1.03908	726	81.4264	5.33838	1.03507	0.0395016
UV8b_6331	[locus_tag=UV8b_6331] [protein=mitochondrial Rho GTPase 1] [protein_id=KDB12837.1] [location=225626..227425] [gbkey=CDS] - [JHTR01000039.1_prot_KDB12837.1_6331]	148.765	9.85	1	5	5	10	1.07023	0.998902	0.91518	1.05782	0.954168	0.99556	599	67.5132	5.99854	1.00779	0.892843
UV8b_4641	[locus_tag=UV8b_4641] [protein=putative oxidoreductase,short chain dehydrogenase] [protein_id=KDB14370.1] [location=join(104301..104848,104899..104945,104997..105265)] [gbkey=CDS] - [JHTR01000023.1_prot_KDB14370.1_4641]	148.521	14.63	1	3	3	8	0.939945	1.04876	1.02992	0.966708	1.04006	1.02793	287	30.8109	8.77783	1.00533	0.901186
UV8b_5101	[locus_tag=UV8b_5101] [protein=37S ribosomal protein Rsm22] [protein_id=KDB14112.1] [location=join(361637..364153,364489..364860)] [gbkey=CDS] - [JHTR01000026.1_prot_KDB14112.1_5101]	148.472	4.99	1	4	4	5	1.00002	1.05813	1.05877	0.962284	0.983235	0.97003	962	105.137	9.1001	0.935394	0.0302702
UV8b_1670	[locus_tag=UV8b_1670] [protein=putative Fungal specific transcription factor] [protein_id=KDB17413.1] [location=complement(join(5496..7125,7396..7548,8273..8589))] [gbkey=CDS] - [JHTR01000006.1_prot_KDB17413.1_1670]	148.329	11.02	1	6	6	7	1.01191	1.01496	1.01934	1.02256	0.959324	1.01248	699	74.5871	7.38623	0.982979	0.43056
UV8b_524	[locus_tag=UV8b_524] [protein=DUF866 domain protein] [protein_id=KDB19133.1] [location=join(2249952..2249986,2250075..2250189,2250270..2250335,2250398..2250520,2250591..2250734)] [gbkey=CDS] - [JHTR01000001.1_prot_KDB19133.1_524]	147.841	45.63	1	5	5	10	0.98788	1.01516	1.05547	0.953037	1.04542	0.980825	160	18.2707	4.89404	0.974096	0.476776
UV8b_728	[locus_tag=UV8b_728] [protein=KH domain protein] [protein_id=KDB18486.1] [location=join(668034..668229,668294..668523,668696..668717,668782..668834,668932..669123,669204..669412,669478..669816,669884..670100)] [gbkey=CDS] - [JHTR01000002.1_prot_KDB18486.1_728]	147.826	13.4	1	5	5	10	1.02473	0.990575	0.974067	0.993664	1.00499	1.01522	485	52.5429	8.48486	1.00819	0.640116
UV8b_6523	[locus_tag=UV8b_6523] [protein=putative rrm-type rna binding protein] [protein_id=KDB12677.1] [location=join(218590..218673,218839..219095,219218..219464)] [gbkey=CDS] - [JHTR01000041.1_prot_KDB12677.1_6523]	147.534	17.44	1	3	3	7	0.942277	0.952335	0.888277	1.13401	1.04953	1.06552	195	21.4036	8.11865	1.16751	0.00892333
UV8b_980	[locus_tag=UV8b_980] [protein=myosin type II heavy chain] [protein_id=KDB18132.1] [location=complement(join(458613..459035,459103..465390,465449..465910))] [gbkey=CDS] - [JHTR01000003.1_prot_KDB18132.1_980]	147.231	5.02	1	9	9	12	1.04749	1.04246	1.02769	0.969444	0.953192	0.959397	2390	272.535	6.65381	0.924427	0.000494434
UV8b_1723	[locus_tag=UV8b_1723] [protein=sorting nexin-41] [protein_id=KDB17466.1] [location=join(686148..686682,687569..687769,687981..688252,688340..688606,688670..689800,689884..689979)] [gbkey=CDS] - [JHTR01000006.1_prot_KDB17466.1_1723]	147.035	13.45	1	10	10	13	0.98235	0.986268	1.00195	1.04199	1.00901	1.01233	833	93.0648	6.75635	1.03123	0.0625697
UV8b_3925	[locus_tag=UV8b_3925] [protein=glutaminyl-tRNA synthetase] [protein_id=KDB15262.1] [location=join(576477..577041,577121..578361,578433..578516)] [gbkey=CDS] - [JHTR01000017.1_prot_KDB15262.1_3925]	146.993	8.43	1	4	5	10	1.00341	0.9776	0.904802	1.11532	1.00999	1.06934	629	71.7636	7.50342	1.10702	0.0723173
UV8b_7478	[locus_tag=UV8b_7478] [protein=phospho-2-dehydro-3-deoxyheptonate aldolase] [protein_id=KDB11692.1] [location=join(53623..54086,54191..55166)] [gbkey=CDS] - [JHTR01000062.1_prot_KDB11692.1_7478]	146.966	22.34	2	9	10	17	1.00107	1.02683	0.984756	0.955539	1.01003	1.01379	479	53.8055	6.94678	0.988946	0.64697
UV8b_2773	[locus_tag=UV8b_2773] [protein=Sec1 family superfamily] [protein_id=KDB16317.1] [location=join(260351..260384,260567..260628,260667..260754,260828..261177,261251..262987)] [gbkey=CDS] - [JHTR01000011.1_prot_KDB16317.1_2773]	146.754	14.15	1	7	7	11	0.987388	0.975764	0.878076	1.0521	0.987819	1.04117	756	84.7732	7.37158	1.08442	0.115927
UV8b_6583	[locus_tag=UV8b_6583] [protein=hypothetical protein] [protein_id=KDB12562.1] [location=join(100749..100928,101022..103568)] [gbkey=CDS] - [JHTR01000042.1_prot_KDB12562.1_6583]	146.72	3.96	1	3	3	4	1.073	1.05108	1.04457	0.982834	0.894205	0.951157	908	99.7526	6.29053	0.892554	0.014211
UV8b_1366	[locus_tag=UV8b_1366] [protein=DUF618 domain protein] [protein_id=KDB17999.1] [location=join(713440..713537,713613..713704,713803..714003,714055..714836)] [gbkey=CDS] - [JHTR01000004.1_prot_KDB17999.1_1366]	146.628	10.26	1	3	3	6	1.02474	0.994173	0.923755	1.02405	0.967331	1.0202	390	42.4304	5.30029	1.02342	0.548048
UV8b_968	[locus_tag=UV8b_968] [protein=membrane zinc transporter] [protein_id=KDB18120.1] [location=413271..414398] [gbkey=CDS] - [JHTR01000003.1_prot_KDB18120.1_968]	146.316	12.8	1	3	3	10	0.830155	0.92179	0.976689	0.974079	1.22307	1.16351	375	40.5948	6.41748	1.23162	0.0712927
UV8b_5831	[locus_tag=UV8b_5831] [protein=tryptophanyl-tRNA synthetase] [protein_id=KDB13452.1] [location=join(431721..432014,432101..432251,432431..432650,432722..433039,433139..433250,433313..433786)] [gbkey=CDS] - [JHTR01000032.1_prot_KDB13452.1_5831]	146.171	11.11	1	5	5	8	0.998007	1.02852	1.0487	0.92465	1.02804	0.972949	522	56.9846	8.36768	0.951358	0.2087
UV8b_6698	[locus_tag=UV8b_6698] [protein=sn-1,2-diacylglycerol cholinephosphotransferase] [protein_id=KDB12474.1] [location=complement(join(168154..169146,169463..169588,169741..169850,170179..170266))] [gbkey=CDS] - [JHTR01000044.1_prot_KDB12474.1_6698]	145.537	3.42	1	1	1	2	0.870167	0.92615	1.15842	0.868715	1.22805	1.07037	438	48.2139	7.69385	1.07188	0.631084
UV8b_8128	[locus_tag=UV8b_8128] [protein=metacaspase CasA] [protein_id=KDB11000.1] [location=complement(join(18893..18918,18981..19150,19271..19709,19808..20558))] [gbkey=CDS] - [JHTR01000083.1_prot_KDB11000.1_8128]	145.142	16.92	1	6	6	10	0.992011	0.985241	1.00365	0.993236	1.05436	1.01651	461	49.5176	6.53662	1.02791	0.210279
UV8b_5594	[locus_tag=UV8b_5594] [protein=26S proteasome regulatory subunit S5A] [protein_id=KDB13496.1] [location=join(114508..114798,114862..115425)] [gbkey=CDS] - [JHTR01000031.1_prot_KDB13496.1_5594]	144.951	25	1	6	6	17	0.970823	0.980195	0.987689	1.00894	1.054	1.02069	284	30.5654	5.13525	1.04932	0.0281255
UV8b_2028	[locus_tag=UV8b_2028] [protein=C3HC4 type (RING finger) zinc finger containing protein] [protein_id=KDB16936.1] [location=join(89792..90061,90160..92255,92323..93794,93861..94885)] [gbkey=CDS] - [JHTR01000008.1_prot_KDB16936.1_2028]	144.867	8.27	1	11	11	18	0.991447	0.97677	1.00589	1.00789	1.00805	1.00453	1620	177.43	6.25244	1.01559	0.142586
UV8b_565	[locus_tag=UV8b_565] [protein=mitochondrial genome maintenance protein MGM101] [protein_id=KDB18323.1] [location=complement(join(195961..196231,196361..196741,197879..197943))] [gbkey=CDS] - [JHTR01000002.1_prot_KDB18323.1_565]	144.834	20.17	1	4	4	12	0.982394	0.997784	1.00878	0.987038	1.01738	1.03796	238	26.4001	5.2876	1.01787	0.345163
UV8b_1930	[locus_tag=UV8b_1930] [protein=high mobility group protein] [protein_id=KDB17333.1] [location=complement(join(631235..632008,632902..633066))] [gbkey=CDS] - [JHTR01000007.1_prot_KDB17333.1_1930]	144.707	22.12	1	9	9	18	0.939063	0.952464	0.904569	1.05656	1.05693	1.08791	312	34.7789	9.48096	1.14495	0.00156485
UV8b_2607	[locus_tag=UV8b_2607] [protein=Peptidyl-prolyl cis-trans isomerase] [protein_id=KDB16572.1] [location=complement(join(314067..314245,314315..314400,314475..314516,314587..314644,314784..314964))] [gbkey=CDS] - [JHTR01000010.1_prot_KDB16572.1_2607]	144.248	49.17	1	7	7	15	0.996274	0.999831	1.0018	1.01953	0.98997	0.993833	181	18.8157	5.42725	1.00181	0.856913
UV8b_3555	[locus_tag=UV8b_3555] [protein=putative arsenate reductase (Arc2)] [protein_id=KDB15524.1] [location=complement(join(196188..196369,196439..196844))] [gbkey=CDS] - [JHTR01000015.1_prot_KDB15524.1_3555]	144.009	13.85	1	1	1	5	1.03358	0.955528	0.970038	1.01993	0.960154	0.991753	195	21.0803	6.3667	1.00429	0.893004
UV8b_8319	[locus_tag=UV8b_8319] [protein=beta-1,3-glucan synthase catalytic subunit] [protein_id=KDB10826.1] [location=join(5069..5250,5307..9052,9890..10601,10672..11005)] [gbkey=CDS] - [JHTR01000106.1_prot_KDB10826.1_8319]	143.7	5.49	1	8	8	13	1.05718	1.02303	0.979882	1.02691	0.876232	0.958622	1657	187.992	7.34229	0.93519	0.248328
UV8b_1161	[locus_tag=UV8b_1161] [protein=SGT1 and CS domain containing protein] [protein_id=KDB17794.1] [location=complement(join(37217..37667,37795..38869,39701..39962))] [gbkey=CDS] - [JHTR01000004.1_prot_KDB17794.1_1161]	143.426	23.7	1	12	12	15	1.00784	1.0231	1.0053	0.977368	0.992844	0.974616	595	66.1694	6.60986	0.969891	0.0185061
UV8b_6299	[locus_tag=UV8b_6299] [protein=autophagy protein Atg13] [protein_id=KDB12805.1] [location=join(26457..26693,26756..26851,26950..29451)] [gbkey=CDS] - [JHTR01000039.1_prot_KDB12805.1_6299]	143.404	7.63	1	4	4	8	0.951496	0.995818	0.983144	1.02259	1.02973	1.06731	944	100.886	9.62744	1.06455	0.0300518
UV8b_7000	[locus_tag=UV8b_7000] [protein=putative prohibitin PHB1] [protein_id=KDB12176.1] [location=complement(join(133120..133632,133741..134070))] [gbkey=CDS] - [JHTR01000049.1_prot_KDB12176.1_7000]	143.343	10.36	1	2	3	10	0.989133	0.953932	0.99677	0.990912	1.01555	1.04112	280	30.7043	9.24658	1.03665	0.140814
UV8b_7845	[locus_tag=UV8b_7845] [protein=actin] [protein_id=KDB11316.1] [location=join(69263..69317,69424..70775)] [gbkey=CDS] - [JHTR01000074.1_prot_KDB11316.1_7845]	143.167	14.96	1	6	6	10	1.02316	0.979155	0.962102	1.04139	0.978722	1.00484	468	52.183	5.23682	1.02042	0.476443
UV8b_322	[locus_tag=UV8b_322] [protein=mitochondrial import receptor subunit tom-20] [protein_id=KDB18931.1] [location=complement(join(1083033..1083152,1083208..1083308,1083406..1083651,1083781..1083841))] [gbkey=CDS] - [JHTR01000001.1_prot_KDB18931.1_322]	143.148	30.29	1	4	4	10	0.946884	0.982443	0.995667	1.00816	1.07675	1.06347	175	19.4521	6.07471	1.07637	0.0435323
UV8b_4374	[locus_tag=UV8b_4374] [protein=putative pyroglutamyl peptidase type I] [protein_id=KDB14851.1] [location=join(378103..378186,378283..378702,378886..379209)] [gbkey=CDS] - [JHTR01000020.1_prot_KDB14851.1_4374]	143.101	26.91	1	4	4	12	1.05993	1.03724	1.04327	1.00828	0.87916	0.924487	275	29.8867	6.58057	0.89539	0.0464001
UV8b_7405	[locus_tag=UV8b_7405] [protein=transcriptional repressor tup1] [protein_id=KDB11696.1] [location=complement(join(23..947,1040..1121,1204..1336))] [gbkey=CDS] - [JHTR01000061.1_prot_KDB11696.1_7405]	143.098	28.5	1	9	9	14	0.989345	0.954153	0.936523	1.04401	1.04489	1.04013	379	40.5369	6.91748	1.08646	0.00599707
UV8b_4838	[locus_tag=UV8b_4838] [protein=SIT4 phosphatase-associated protein] [protein_id=KDB14243.1] [location=complement(join(169452..170921,171051..171719))] [gbkey=CDS] - [JHTR01000024.1_prot_KDB14243.1_4838]	142.906	8.99	1	5	5	10	0.987302	1.00855	1.04151	0.931403	1.0305	0.986782	712	79.2275	4.70361	0.970806	0.41746
UV8b_468	[locus_tag=UV8b_468] [protein=xanthine dehydrogenase] [protein_id=KDB19077.1] [location=complement(join(2001754..2001770,2001839..2004006,2004119..2004312))] [gbkey=CDS] - [JHTR01000001.1_prot_KDB19077.1_468]	142.662	12.88	1	10	10	12	1.01395	0.972111	0.997243	1.01413	1.01807	0.990461	792	86.1464	6.29053	1.01319	0.428436
UV8b_6109	[locus_tag=UV8b_6109] [protein=putative 6-phosphofructo-2-kinase/fructose-2, 6-bisphosphate 2-phosphatase] [protein_id=KDB13109.1] [location=join(279403..279416,279554..279742,279816..280119,280174..280254,280387..280992,281084..281533)] [gbkey=CDS] - [JHTR01000036.1_prot_KDB13109.1_6109]	142.496	7.68	1	4	4	6	0.993339	1.0192	0.99335	0.974143	1.05379	1.00846	547	61.8203	6.45557	1.01015	0.700719
UV8b_3264	[locus_tag=UV8b_3264] [protein=U2 small nuclear ribonucleoprotein A'] [protein_id=KDB15952.1] [location=join(461099..461177,461302..461342,461482..461742,461904..462038,462131..462349)] [gbkey=CDS] - [JHTR01000013.1_prot_KDB15952.1_3264]	142.444	10.66	1	2	2	5	1.08975	1.02704	0.950454	1.10186	0.882737	0.976356	244	27.3274	6.3667	0.965346	0.661997
UV8b_6912	[locus_tag=UV8b_6912] [protein=DNA-dependent RNA polymerase II beta subunit] [protein_id=KDB12208.1] [location=complement(121053..123485)] [gbkey=CDS] - [JHTR01000048.1_prot_KDB12208.1_6912]	142.024	13.33	1	9	9	13	1.00982	1.00369	0.973792	1.00919	1.0216	0.993318	810	91.243	5.70654	1.01232	0.424668
UV8b_829	[locus_tag=UV8b_829] [protein=homogentisate 1,2-dioxygenase] [protein_id=KDB18587.1] [location=complement(join(1003589..1004927,1005064..1005131))] [gbkey=CDS] - [JHTR01000002.1_prot_KDB18587.1_829]	141.735	25.85	1	10	10	16	1.01623	1.00868	0.992823	1.02216	1.00441	1.00493	468	51.3932	6.44287	1.00456	0.638066
UV8b_3968	[locus_tag=UV8b_3968] [protein=hypothetical protein] [protein_id=KDB15128.1] [location=join(254440..255783,256150..256230)] [gbkey=CDS] - [JHTR01000018.1_prot_KDB15128.1_3968]	141.671	6.96	2	3	3	4	0.998334	1.01853	1.05568	0.897994	1.01523	1.00797	474	50.2723	10.7554	0.950743	0.290752
UV8b_5770	[locus_tag=UV8b_5770] [protein=eukaryotic translation initiation factor 2 gamma subunit] [protein_id=KDB13391.1] [location=248958..249473] [gbkey=CDS] - [JHTR01000032.1_prot_KDB13391.1_5770]	141.667	39.77	1	6	6	14	1.02713	1.03205	0.999353	0.974308	0.946136	0.981348	171	18.7835	5.89697	0.948752	0.0242764
UV8b_4412	[locus_tag=UV8b_4412] [protein=2-keto-4-pentenoate hydratase] [protein_id=KDB14889.1] [location=complement(join(510508..510935,511029..511240,511459..511550))] [gbkey=CDS] - [JHTR01000020.1_prot_KDB14889.1_4412]	141.51	24.28	1	4	4	7	1.01509	0.998659	1.02949	0.975829	0.989021	0.957926	243	26.2747	7.38623	0.960415	0.0338783
UV8b_5774	[locus_tag=UV8b_5774] [protein=putative mitochondrial ATPase inhibitor] [protein_id=KDB13395.1] [location=complement(join(255950..255989,256091..256222,256379..256500))] [gbkey=CDS] - [JHTR01000032.1_prot_KDB13395.1_5774]	141.337	21.65	1	3	3	13	0.944456	0.929996	1.09483	0.891698	1.1476	1.01364	97	10.8837	9.89111	1.02817	0.774017
UV8b_6128	[locus_tag=UV8b_6128] [protein=tRNA-dihydrouridine synthase 3] [protein_id=KDB13128.1] [location=join(339683..340029,340092..342020,342121..342202)] [gbkey=CDS] - [JHTR01000036.1_prot_KDB13128.1_6128]	140.805	18.6	1	11	11	13	0.971775	1.00662	1.00174	1.01294	1.03841	1.02096	785	87.5826	7.1958	1.03093	0.0810189
UV8b_3285	[locus_tag=UV8b_3285] [protein=TOR kinase] [protein_id=KDB15973.1] [location=complement(join(523466..523918,524004..528503,528592..530813,530874..530941,530994..531058))] [gbkey=CDS] - [JHTR01000013.1_prot_KDB15973.1_3285]	140.77	3.53	1	7	7	13	0.946923	0.955912	0.943483	1.06153	1.01148	1.05037	2435	275.747	6.91748	1.09734	0.00409369
UV8b_4281	[locus_tag=UV8b_4281] [protein=transmembrane BAX inhibitor motif-containing protein] [protein_id=KDB14758.1] [location=complement(join(108687..109178,109246..109419,109724..109894))] [gbkey=CDS] - [JHTR01000020.1_prot_KDB14758.1_4281]	140.727	11.15	1	2	2	8	0.914512	0.915196	0.904083	1.0644	1.08277	1.13334	278	31.0789	5.79541	1.19999	0.000956845
UV8b_6266	[locus_tag=UV8b_6266] [protein=SAP domain containing protein] [protein_id=KDB12905.1] [location=complement(139820..140689)] [gbkey=CDS] - [JHTR01000038.1_prot_KDB12905.1_6266]	140.402	22.49	1	6	6	10	0.982069	0.97932	0.903109	1.10809	1.0459	1.03625	289	30.3455	9.39307	1.11372	0.0339903
UV8b_8236	[locus_tag=UV8b_8236] [protein=2-nitropropane dioxygenase] [protein_id=KDB10942.1] [location=join(79065..79299,79380..79919,80000..80013,80105..80190,80261..80440,80531..80639)] [gbkey=CDS] - [JHTR01000092.1_prot_KDB10942.1_8236]	140.375	11.37	1	2	2	3	0.959442	0.954698	1.06663	1.00779	1.12521	1.0367	387	40.7982	7.15186	1.06338	0.283053
UV8b_3018	[locus_tag=UV8b_3018] [protein=Regulator of nonsense transcripts 1] [protein_id=KDB16088.1] [location=join(316061..316350,316439..319496)] [gbkey=CDS] - [JHTR01000012.1_prot_KDB16088.1_3018]	140.268	9.24	1	9	9	11	1.05547	1.02561	0.972349	1.045	0.923325	1.00265	1115	123.021	6.82959	0.972994	0.558822
UV8b_4884	[locus_tag=UV8b_4884] [protein=thiazole biosynthetic enzyme variant 1] [protein_id=KDB14289.1] [location=complement(join(337821..337915,338003..338873))] [gbkey=CDS] - [JHTR01000024.1_prot_KDB14289.1_4884]	140.134	19	1	6	6	15	0.978293	1.00206	0.971337	1.01617	0.996939	1.04175	321	34.3003	6.69775	1.03495	0.0975845
UV8b_4537	[locus_tag=UV8b_4537] [protein=37S ribosomal protein MRP4 precursor] [protein_id=KDB14681.1] [location=join(356575..357467,357541..358009)] [gbkey=CDS] - [JHTR01000021.1_prot_KDB14681.1_4537]	140.085	11.48	1	4	4	7	1.02507	1.01186	0.947479	1.02565	0.990864	1.00566	453	49.9186	8.6167	1.01265	0.653661
UV8b_4457	[locus_tag=UV8b_4457] [protein=Citrate synthase precursor] [protein_id=KDB14601.1] [location=86821..87114] [gbkey=CDS] - [JHTR01000021.1_prot_KDB14601.1_4457]	140.007	21.65	1	2	2	10	1.03183	1.0313	1.08054	0.953088	0.978538	0.963845	97	10.7307	9.27588	0.921048	0.00989424
UV8b_513	[locus_tag=UV8b_513] [protein=3-oxoacyl-(acyl-carrier-protein) reductase] [protein_id=KDB19122.1] [location=complement(join(2206627..2207083,2207228..2207855,2208141..2208223,2208321..2208481))] [gbkey=CDS] - [JHTR01000001.1_prot_KDB19122.1_513]	139.726	9.28	1	3	3	5	0.96503	0.993034	1.1171	0.957091	1.03005	0.995979	442	46.7235	8.23584	0.970071	0.581749
UV8b_7459	[locus_tag=UV8b_7459] [protein=hypothetical protein] [protein_id=KDB11673.1] [location=join(35..51,159..744)] [gbkey=CDS] - [JHTR01000062.1_prot_KDB11673.1_7459]	139.697	19	1	4	4	12	1.00876	0.958723	0.933472	1.04152	1.00175	1.04985	200	21.6518	7.50342	1.06624	0.0740117
UV8b_3563	[locus_tag=UV8b_3563] [protein=putative acetylserotonin methytransferase-like protein (ASMTL)] [protein_id=KDB15532.1] [location=join(207497..207700,207752..208387)] [gbkey=CDS] - [JHTR01000015.1_prot_KDB15532.1_3563]	139.607	13.98	1	4	4	8	1.06678	1.01399	0.916032	1.07711	0.850547	0.970539	279	30.9938	5.70654	0.967097	0.698545
UV8b_6666	[locus_tag=UV8b_6666] [protein=L-xylulose reductase] [protein_id=KDB12442.1] [location=join(65151..65470,65597..66077)] [gbkey=CDS] - [JHTR01000044.1_prot_KDB12442.1_6666]	139.575	33.46	1	9	9	22	1.01706	1.01341	1.01138	0.97876	1.02239	0.994334	266	28.3303	6.3667	0.984756	0.296086
UV8b_1659	[locus_tag=UV8b_1659] [protein=endosomal integral membrane protein] [protein_id=KDB17775.1] [location=join(925925..927803,927895..927962)] [gbkey=CDS] - [JHTR01000005.1_prot_KDB17775.1_1659]	139.419	10.03	1	5	5	10	1.04591	0.979589	0.984815	1.01615	0.965271	0.983545	648	73.0377	6.97607	0.984938	0.591882
UV8b_5018	[locus_tag=UV8b_5018] [protein=glycine cleavage system T protein] [protein_id=KDB14029.1] [location=95516..96856] [gbkey=CDS] - [JHTR01000026.1_prot_KDB14029.1_5018]	139.018	15.47	1	8	8	15	0.912283	0.995237	1.04709	0.94249	1.13464	1.05279	446	47.8977	9.12939	1.05934	0.43933
UV8b_869	[locus_tag=UV8b_869] [protein=stromal membrane-associated protein] [protein_id=KDB18021.1] [location=complement(join(89533..91172,91255..91372))] [gbkey=CDS] - [JHTR01000003.1_prot_KDB18021.1_869]	138.715	10.43	1	5	5	11	1.07398	1.08172	1.04066	0.910804	0.907385	0.945973	585	59.6188	9.23193	0.864783	0.00122029
UV8b_3252	[locus_tag=UV8b_3252] [protein=pentatricopeptide repeat protein] [protein_id=KDB15940.1] [location=416547..418463] [gbkey=CDS] - [JHTR01000013.1_prot_KDB15940.1_3252]	138.592	10.34	1	4	4	8	1.03781	0.949642	1.02192	1.01523	0.937484	0.976415	638	69.654	6.75635	0.973336	0.489794
UV8b_7320	[locus_tag=UV8b_7320] [protein=acyl binding protein] [protein_id=KDB11807.1] [location=join(73766..73886,74025..74083,74203..74292)] [gbkey=CDS] - [JHTR01000058.1_prot_KDB11807.1_7320]	138.477	48.31	1	3	3	8	1.13482	1.02164	0.98545	1.00952	0.838155	0.861322	89	9.58982	4.75439	0.862214	0.108409
UV8b_7240	[locus_tag=UV8b_7240] [protein=hypothetical protein] [protein_id=KDB11915.1] [location=complement(join(94764..94960,95028..95485,95563..96161))] [gbkey=CDS] - [JHTR01000056.1_prot_KDB11915.1_7240]	138.253	24.46	1	8	8	19	1.02086	0.996322	1.02028	1.00033	0.961035	1.02565	417	47.5881	6.72705	0.98339	0.457298
UV8b_6520	[locus_tag=UV8b_6520] [protein=chromatin remodelling complex ATPase chain ISW1] [protein_id=KDB12674.1] [location=complement(join(210200..210210,210274..210382,210473..213430,213510..213836))] [gbkey=CDS] - [JHTR01000041.1_prot_KDB12674.1_6520]	137.905	13.93	1	15	16	21	1.02242	1.0176	0.970631	1.02168	0.967999	1.00836	1134	129.346	7.91357	0.99581	0.864363
UV8b_2088	[locus_tag=UV8b_2088] [protein=major facilitator superfamily transporter] [protein_id=KDB16996.1] [location=complement(join(320659..322113,322314..322583))] [gbkey=CDS] - [JHTR01000008.1_prot_KDB16996.1_2088]	137.798	10.8	1	6	6	8	0.571956	0.58179	0.575205	1.36946	1.60144	1.52621	574	61.597	6.29053	2.60106	0.000174661
UV8b_5239	[locus_tag=UV8b_5239] [protein=vesicle fusion factor NSFI] [protein_id=KDB13905.1] [location=complement(join(245651..245986,246120..247989,248057..248364))] [gbkey=CDS] - [JHTR01000028.1_prot_KDB13905.1_5239]	137.797	20.67	1	12	12	20	1.00517	0.999133	0.981903	0.995328	1.00376	1.0154	837	90.7835	7.57666	1.00947	0.35778
UV8b_228	[locus_tag=UV8b_228] [protein=psi protein] [protein_id=KDB18837.1] [location=join(725444..725523,725691..726444,726551..726844)] [gbkey=CDS] - [JHTR01000001.1_prot_KDB18837.1_228]	137.694	27.47	1	9	9	15	0.936024	0.959378	0.952329	1.04366	1.03268	1.05152	375	40.5386	9.15869	1.09837	0.000448969
UV8b_4119	[locus_tag=UV8b_4119] [protein=putative cytochrome b5] [protein_id=KDB14973.1] [location=complement(join(202948..203065,203171..203401,203867..204020,204092..204188))] [gbkey=CDS] - [JHTR01000019.1_prot_KDB14973.1_4119]	137.285	11.06	1	2	2	6	1.04658	1.03359	0.984766	1.02912	0.947132	0.99163	199	21.6526	5.92236	0.968335	0.345264
UV8b_2483	[locus_tag=UV8b_2483] [protein=RNP domain protein] [protein_id=KDB16892.1] [location=complement(join(801200..801508,801565..801989,802071..802122,802236..802403,802465..802558,802632..802639,802785..802837,802893..803226,803288..803317))] [gbkey=CDS] - [JHTR01000009.1_prot_KDB16892.1_2483]	137.257	15.51	1	8	8	14	1.01865	0.97358	1.04485	0.998387	1.01001	0.984834	490	52.3966	9.68604	0.985562	0.543615
UV8b_6813	[locus_tag=UV8b_6813] [protein=putative MFS transporter] [protein_id=KDB12326.1] [location=complement(join(84008..84078,84168..84335,84425..85793,85950..86050,86239..86284))] [gbkey=CDS] - [JHTR01000046.1_prot_KDB12326.1_6813]	137.116	3.94	1	2	2	6	1.06365	1.09922	1.07707	0.915143	0.811543	0.926263	584	63.6814	8.79248	0.818827	0.00673086
UV8b_4103	[locus_tag=UV8b_4103] [protein=putative 5-oxoprolinase] [protein_id=KDB14957.1] [location=join(150714..151748,151859..153120,153252..154995)] [gbkey=CDS] - [JHTR01000019.1_prot_KDB14957.1_4103]	137.073	12.33	1	11	11	16	0.985285	0.999939	1.02785	1.00168	1.00388	1.00798	1346	146.263	6.39209	1.00016	0.99065
UV8b_933	[locus_tag=UV8b_933] [protein=PA domain-containing protein] [protein_id=KDB18085.1] [location=complement(join(278060..278169,278220..279583,279680..280224,280395..280670))] [gbkey=CDS] - [JHTR01000003.1_prot_KDB18085.1_933]	136.903	14.14	1	9	9	14	1.0599	0.984171	0.931688	1.05998	0.938771	1.00935	764	83.6672	6.78564	1.01087	0.843483
UV8b_4050	[locus_tag=UV8b_4050] [protein=ethanolamine-phosphate cytidylyltransferase] [protein_id=KDB15210.1] [location=complement(join(501884..502243,502337..503111,503174..503291,503371..503470))] [gbkey=CDS] - [JHTR01000018.1_prot_KDB15210.1_4050]	136.809	12	1	5	5	7	1.01454	1.05566	1.07993	0.899892	0.973507	0.935788	450	50.268	6.65381	0.891766	0.0164163
UV8b_5038	[locus_tag=UV8b_5038] [protein=putative RWD domain protein (Gir2)] [protein_id=KDB14049.1] [location=complement(join(152846..153471,153552..153618))] [gbkey=CDS] - [JHTR01000026.1_prot_KDB14049.1_5038]	136.766	16.52	1	4	4	7	0.942954	1.01438	1.08703	0.942107	1.08733	1.00102	230	25.5808	4.44971	0.995431	0.941364
UV8b_3819	[locus_tag=UV8b_3819] [protein=putative ribosome biogenesis protein Ria1] [protein_id=KDB15393.1] [location=complement(361851..365000)] [gbkey=CDS] - [JHTR01000016.1_prot_KDB15393.1_3819]	136.672	7.53	1	6	6	11	1.03129	1.02518	1.12385	0.924477	1.02376	0.937749	1049	115.698	5.57959	0.907452	0.0925687
UV8b_5654	[locus_tag=UV8b_5654] [protein=CORD and CS domain containing protein] [protein_id=KDB13556.1] [location=complement(join(302513..302834,302910..303459,303561..303672))] [gbkey=CDS] - [JHTR01000031.1_prot_KDB13556.1_5654]	136.547	25.08	1	8	8	15	0.986538	1.02101	0.963331	1.01547	1.00312	1.01832	327	35.8941	8.32373	1.02222	0.274423
UV8b_7544	[locus_tag=UV8b_7544] [protein=DNA replication licensing factor mcm3] [protein_id=KDB11621.1] [location=join(160183..160255,160324..162904,163037..163070)] [gbkey=CDS] - [JHTR01000064.1_prot_KDB11621.1_7544]	136.414	10.5	1	8	8	11	1.03198	0.966043	0.895873	1.12604	0.953146	0.975478	895	99.2594	6.52197	1.05555	0.468744
UV8b_7433	[locus_tag=UV8b_7433] [protein=putative mRNA processing protein (Mss51)] [protein_id=KDB11724.1] [location=join(92802..93297,93352..94009,94077..94104)] [gbkey=CDS] - [JHTR01000061.1_prot_KDB11724.1_7433]	136.247	19.34	1	6	6	11	1.03044	0.97253	0.986533	0.997708	1.00404	0.991447	393	45.0701	6.07471	1.00124	0.94815
UV8b_8037	[locus_tag=UV8b_8037] [protein=DUF410 domain-containing protein] [protein_id=KDB11127.1] [location=complement(join(99604..100270,100439..100776))] [gbkey=CDS] - [JHTR01000080.1_prot_KDB11127.1_8037]	136.068	17.07	1	6	6	13	0.99372	1.03121	0.984952	0.972954	1.00952	1.03362	334	36.4154	6.55127	1.00206	0.931479
UV8b_5868	[locus_tag=UV8b_5868] [protein=putative 3-hydroxyisobutyrate dehydrogenase G6G8.5] [protein_id=KDB13278.1] [location=complement(join(174853..175584,175714..175839,175966..176070))] [gbkey=CDS] - [JHTR01000033.1_prot_KDB13278.1_5868]	136.022	11.56	1	2	2	6	1.03672	0.994705	0.90549	1.07917	0.940212	0.990381	320	33.9005	9.21729	1.02481	0.687441
UV8b_2810	[locus_tag=UV8b_2810] [protein=saccharopine dehydrogenase] [protein_id=KDB16354.1] [location=complement(join(403733..403890,403962..404527,404624..405197,405325..405379))] [gbkey=CDS] - [JHTR01000011.1_prot_KDB16354.1_2810]	135.826	13.78	1	5	5	9	0.982621	0.916962	0.941198	1.05191	1.08563	1.05608	450	49.0131	7.02002	1.1242	0.00581595
UV8b_4971	[locus_tag=UV8b_4971] [protein=diphthamide biosynthesis protein 2] [protein_id=KDB14181.1] [location=383784..385439] [gbkey=CDS] - [JHTR01000025.1_prot_KDB14181.1_4971]	135.784	6.53	1	2	2	3	1.04066	0.994656	0.940387	1.03806	0.952994	1.03086	551	59.1687	5.33838	1.01553	0.71822
UV8b_1602	[locus_tag=UV8b_1602] [protein=putative UPF0016 domain protein] [protein_id=KDB17718.1] [location=complement(join(761808..761878,761981..762887,762979..763602))] [gbkey=CDS] - [JHTR01000005.1_prot_KDB17718.1_1602]	135.574	16.89	1	7	7	13	0.987236	0.997406	1.03925	0.959959	0.998068	0.99851	533	57.1082	9.15869	0.977726	0.333083
UV8b_7428	[locus_tag=UV8b_7428] [protein=putative lectin family integral membrane protein] [protein_id=KDB11719.1] [location=complement(join(82667..83432,83510..83580,83695..83718,83782..83829))] [gbkey=CDS] - [JHTR01000061.1_prot_KDB11719.1_7428]	134.868	27.48	1	5	5	8	1.04164	1.01617	0.957605	1.06782	0.927902	1.00498	302	33.9698	7.51807	0.995121	0.922735
UV8b_5753	[locus_tag=UV8b_5753] [protein=putative Noc1p protein] [protein_id=KDB13374.1] [location=join(188321..188772,188844..190812)] [gbkey=CDS] - [JHTR01000032.1_prot_KDB13374.1_5753]	134.767	9.06	1	6	6	6	0.976498	1.00686	0.989138	0.978737	0.998373	0.988968	806	87.3439	6.23975	0.99784	0.848088
UV8b_6278	[locus_tag=UV8b_6278] [protein=putative endosomal SPRY domain protein] [protein_id=KDB12917.1] [location=join(182386..182650,182772..183077,183190..184235)] [gbkey=CDS] - [JHTR01000038.1_prot_KDB12917.1_6278]	134.676	4.09	1	2	2	4	1.02646	1.01729	1.00003	0.903237	1.06076	0.951464	538	57.8563	6.3667	0.957841	0.416411
UV8b_5194	[locus_tag=UV8b_5194] [protein=amine oxidase] [protein_id=KDB13860.1] [location=join(106478..106834,106968..107819)] [gbkey=CDS] - [JHTR01000028.1_prot_KDB13860.1_5194]	134.523	13.93	1	4	4	6	0.933205	0.890303	0.90787	1.12017	1.05951	1.11261	402	45.2013	8.71924	1.20536	0.00120261
UV8b_7923	[locus_tag=UV8b_7923] [protein=nuclear migration protein nudF] [protein_id=KDB11248.1] [location=complement(join(50857..52080,52181..52331,52553..52590))] [gbkey=CDS] - [JHTR01000076.1_prot_KDB11248.1_7923]	134.467	13.83	1	5	5	7	1.00588	1.05344	1.04917	0.938793	0.982595	0.936749	470	50.8835	7.63525	0.919461	0.0173218
UV8b_7947	[locus_tag=UV8b_7947] [protein=hypothetical protein] [protein_id=KDB11214.1] [location=join(92023..92131,92313..92596)] [gbkey=CDS] - [JHTR01000077.1_prot_KDB11214.1_7947]	134.326	31.54	1	3	3	10	0.9037	0.881501	0.898949	1.15546	1.05354	1.09039	130	14.2819	7.95752	1.22921	0.00256356
UV8b_6843	[locus_tag=UV8b_6843] [protein=ATP synthase subunit 4 precursor] [protein_id=KDB12356.1] [location=complement(join(229996..230021,230110..230332,230410..230861,230955..230985))] [gbkey=CDS] - [JHTR01000046.1_prot_KDB12356.1_6843]	134.195	22.22	1	5	5	17	0.980038	0.982841	0.984889	1.03088	0.996298	0.976021	243	26.3882	9.40771	1.01881	0.314459
UV8b_5709	[locus_tag=UV8b_5709] [protein=u3 small nucleolar RNA-associated protein 5] [protein_id=KDB13330.1] [location=complement(join(40397..40442,40544..41865))] [gbkey=CDS] - [JHTR01000032.1_prot_KDB13330.1_5709]	134.171	7.47	1	3	3	8	1.03767	1.01264	1.10715	0.907795	1.03087	0.948874	455	48.2113	4.61475	0.914512	0.121602
UV8b_1773	[locus_tag=UV8b_1773] [protein=septin] [protein_id=KDB17176.1] [location=join(90762..91207,91417..92479)] [gbkey=CDS] - [JHTR01000007.1_prot_KDB17176.1_1773]	133.93	23.51	1	9	9	12	0.93476	0.951343	0.934553	1.06809	1.11193	1.09636	502	56.0093	7.57666	1.16157	0.000407878
UV8b_104	[locus_tag=UV8b_104] [protein=RNA recognition domain-containing protein] [protein_id=KDB18713.1] [location=join(337003..337063,337159..337690,337824..338157)] [gbkey=CDS] - [JHTR01000001.1_prot_KDB18713.1_104]	133.858	24.03	1	7	7	10	0.911919	1.0065	1.0648	0.962719	1.10333	0.957817	308	34.0003	6.80029	1.01362	0.845707
UV8b_5031	[locus_tag=UV8b_5031] [protein=protein arginine N-methyltransferase 1] [protein_id=KDB14042.1] [location=join(138895..138993,139634..139743,139848..140193)] [gbkey=CDS] - [JHTR01000026.1_prot_KDB14042.1_5031]	133.857	16.3	1	2	2	8	1.03129	1.04147	1.03217	0.973322	0.988065	0.93814	184	20.8575	5.66846	0.933845	0.0106957
UV8b_332	[locus_tag=UV8b_332] [protein=pre-mRNA splicing factor CEF1] [protein_id=KDB18941.1] [location=complement(join(1109116..1109469,1109556..1111562))] [gbkey=CDS] - [JHTR01000001.1_prot_KDB18941.1_332]	133.78	15.52	1	10	10	15	1.03794	0.986492	0.978431	1.03974	0.991951	0.99209	786	87.3579	7.82568	1.00697	0.790109
UV8b_7187	[locus_tag=UV8b_7187] [protein=putative 1-aminocyclopropane-1-carboxylate deaminase] [protein_id=KDB11958.1] [location=join(99208..99407,99507..100359)] [gbkey=CDS] - [JHTR01000054.1_prot_KDB11958.1_7187]	133.744	11.71	1	3	3	6	1.03353	1.04712	1.05419	0.93934	0.964931	0.952917	350	36.734	6.72705	0.91143	0.000636585
UV8b_6623	[locus_tag=UV8b_6623] [protein=D-3-phosphoglycerate dehydrogenase 1] [protein_id=KDB12602.1] [location=join(242739..243043,243131..243398,243508..244027,244388..244446,244512..244607)] [gbkey=CDS] - [JHTR01000042.1_prot_KDB12602.1_6623]	133.732	20.72	2	8	8	14	1.01413	0.996738	0.967964	1.00924	0.948685	0.961709	415	45.3434	6.46826	0.980126	0.435567
UV8b_2762	[locus_tag=UV8b_2762] [protein=putative DUF221 domain protein] [protein_id=KDB16306.1] [location=join(237648..237770,237860..238060,238115..240267,240350..240518)] [gbkey=CDS] - [JHTR01000011.1_prot_KDB16306.1_2762]	133.706	4.99	1	4	4	7	0.914068	0.944425	1.01151	1.05393	1.12608	0.994287	881	100.749	6.25244	1.10603	0.10088
UV8b_46	[locus_tag=UV8b_46] [protein=haloalkanoic acid dehalogenase] [protein_id=KDB18655.1] [location=168599..169315] [gbkey=CDS] - [JHTR01000001.1_prot_KDB18655.1_46]	133.39	23.95	1	4	4	8	0.931958	0.991039	0.949487	1.05127	1.04086	1.05696	238	26.4184	5.89697	1.09629	0.00706982
UV8b_8025	[locus_tag=UV8b_8025] [protein=putative isoleucine--tRNA ligase] [protein_id=KDB11115.1] [location=join(59294..59332,59447..61764,61860..62316,63481..63750)] [gbkey=CDS] - [JHTR01000080.1_prot_KDB11115.1_8025]	133.218	1.85	1	1	1	3	0.914394	0.975032	0.988398	0.964511	1.12695	1.0406	1027	113.845	6.17627	1.08834	0.179515
UV8b_6179	[locus_tag=UV8b_6179] [protein=ribosomal biogenesis protein Gar2] [protein_id=KDB12977.1] [location=complement(join(138066..139165,139224..139298,139352..139379))] [gbkey=CDS] - [JHTR01000037.1_prot_KDB12977.1_6179]	133.15	29.25	1	10	10	18	0.980794	1.00634	0.994538	1.01378	1.02884	1.03139	400	43.2755	9.37842	1.03097	0.0286964
UV8b_1301	[locus_tag=UV8b_1301] [protein=Rab5-like protein ypt51] [protein_id=KDB17934.1] [location=join(536187..536261,536366..536429,536512..537071)] [gbkey=CDS] - [JHTR01000004.1_prot_KDB17934.1_1301]	133.121	23.71	2	4	4	11	0.957221	0.982401	1.05199	1.01164	1.04729	0.998222	232	24.5535	6.0874	1.02191	0.531048
UV8b_7302	[locus_tag=UV8b_7302] [protein=serine/threonine-protein kinase gad8] [protein_id=KDB11879.1] [location=complement(join(168056..168262,168429..169987,170068..170199,170329..170350))] [gbkey=CDS] - [JHTR01000057.1_prot_KDB11879.1_7302]	133.11	12.68	1	8	9	11	1.00356	1.07019	1.10137	0.905923	1.00371	0.946559	639	70.7051	8.22119	0.899554	0.0583155
UV8b_919	[locus_tag=UV8b_919] [protein=cysteine synthase 2] [protein_id=KDB18071.1] [location=complement(230987..232378)] [gbkey=CDS] - [JHTR01000003.1_prot_KDB18071.1_919]	133.106	12.53	1	4	4	7	1.04399	0.983657	1.00945	1.01674	1.03154	0.963091	463	49.093	7.13721	0.991533	0.768108
UV8b_4268	[locus_tag=UV8b_4268] [protein=Phospholipid-binding protein] [protein_id=KDB14745.1] [location=join(81065..81109,81139..82206)] [gbkey=CDS] - [JHTR01000020.1_prot_KDB14745.1_4268]	133.092	10.81	1	3	3	6	1.0304	0.956605	0.918452	1.01697	1.00564	1.01519	370	40.3102	5.79541	1.04555	0.252801
UV8b_3571	[locus_tag=UV8b_3571] [protein=2OG-Fe oxygenase] [protein_id=KDB15540.1] [location=complement(225814..226941)] [gbkey=CDS] - [JHTR01000015.1_prot_KDB15540.1_3571]	133.051	12.8	1	5	5	9	1.11591	1.05337	1.09911	0.917966	0.904967	0.928697	375	41.6992	6.91748	0.841894	0.000981308
UV8b_3220	[locus_tag=UV8b_3220] [protein=cytochrome P450 61] [protein_id=KDB15908.1] [location=complement(join(293851..293889,294034..294317,294430..295400,295495..295645,295827..295995))] [gbkey=CDS] - [JHTR01000013.1_prot_KDB15908.1_3220]	132.876	9.87	1	4	4	5	0.936533	0.928387	0.891488	1.07265	1.13793	1.10829	537	60.6963	7.10791	1.20406	0.00131885
UV8b_2882	[locus_tag=UV8b_2882] [protein=peptidyl-prolyl cis/trans isomerase] [protein_id=KDB16426.1] [location=complement(join(596330..596587,596830..596955))] [gbkey=CDS] - [JHTR01000011.1_prot_KDB16426.1_2882]	132.849	35.43	1	4	4	7	1.05362	0.989415	0.927994	1.05789	1.01144	1.00302	127	13.911	9.24658	1.0341	0.446878
UV8b_8340	[locus_tag=UV8b_8340] [protein=DNA-directed RNA polymerases I and III 40 kDa polypeptide] [protein_id=KDB10809.1] [location=join(11528..11599,11693..12326,12417..16159)] [gbkey=CDS] - [JHTR01000118.1_prot_KDB10809.1_8340]	132.635	4.86	1	5	5	9	0.990164	0.995314	0.971232	1.04206	0.979418	0.98442	1482	156.131	5.04639	1.01663	0.486123
UV8b_7922	[locus_tag=UV8b_7922] [protein=ER membrane protein] [protein_id=KDB11247.1] [location=complement(join(48003..48538,48673..48896,49313..49644))] [gbkey=CDS] - [JHTR01000076.1_prot_KDB11247.1_7922]	132.45	7.99	1	3	3	7	1.14613	1.0337	0.858797	1.03004	0.849008	0.98334	363	39.5144	10.1841	0.942001	0.587245
UV8b_1046	[locus_tag=UV8b_1046] [protein=hypothetical protein] [protein_id=KDB18198.1] [location=join(659083..659328,659391..660629)] [gbkey=CDS] - [JHTR01000003.1_prot_KDB18198.1_1046]	132.413	10.12	1	4	4	7	0.956488	0.992124	1.03348	0.934571	1.08608	1.01073	494	55.0901	9.42236	1.01653	0.754591
UV8b_7556	[locus_tag=UV8b_7556] [protein=putative glutathione S-transferase] [protein_id=KDB11589.1] [location=complement(77662..78330)] [gbkey=CDS] - [JHTR01000065.1_prot_KDB11589.1_7556]	132.379	15.77	1	3	3	9	0.974348	0.956034	1.01052	0.98269	1.12204	1.03983	222	25.2126	7.00537	1.06925	0.193627
UV8b_8074	[locus_tag=UV8b_8074] [protein=AIF-like mitochondrial oxidoreductase (Nfrl)] [protein_id=KDB11086.1] [location=join(75192..75411,75556..76964)] [gbkey=CDS] - [JHTR01000081.1_prot_KDB11086.1_8074]	132.367	10.33	1	4	4	8	1.04482	1.00367	0.95478	1.07741	0.943569	0.980836	542	57.2344	6.90283	0.999516	0.992364
UV8b_6549	[locus_tag=UV8b_6549] [protein=cell cycle control protein] [protein_id=KDB12528.1] [location=complement(join(3841..3903,4001..4449,4572..5029,5111..5549,5616..5660,5717..5729))] [gbkey=CDS] - [JHTR01000042.1_prot_KDB12528.1_6549]	132.363	10.45	1	6	6	11	0.941303	0.968181	1.04822	0.947548	1.09202	1.01726	488	51.8497	5.47803	1.03351	0.564286
UV8b_7149	[locus_tag=UV8b_7149] [protein=ER protein BIG1] [protein_id=KDB12006.1] [location=complement(join(62903..63042,63098..63767))] [gbkey=CDS] - [JHTR01000053.1_prot_KDB12006.1_7149]	132.197	9.29	1	2	2	5	0.947897	0.954651	1.02355	0.994103	1.10643	1.04395	269	29.3022	7.82568	1.07463	0.14668
UV8b_1887	[locus_tag=UV8b_1887] [protein=LAlv9 family protein] [protein_id=KDB17290.1] [location=complement(join(501905..503386,503499..503711,503830..504256,504393..504640))] [gbkey=CDS] - [JHTR01000007.1_prot_KDB17290.1_1887]	132.164	13.05	1	7	7	8	0.978866	0.973069	1.0799	0.916726	1.07463	0.962833	789	85.3691	5.69385	0.974388	0.680096
UV8b_8341	[locus_tag=UV8b_8341] [protein=DNA-directed RNA polymerases I and III 40 kDa polypeptide] [protein_id=KDB10810.1] [location=join(17728..17793,17870..18949)] [gbkey=CDS] - [JHTR01000118.1_prot_KDB10810.1_8341]	132.131	17.32	1	6	6	8	1.01172	1.01173	1.02972	0.983436	1.00135	0.994517	381	42.4846	6.17627	0.975805	0.0363308
UV8b_4753	[locus_tag=UV8b_4753] [protein=hypothetical protein] [protein_id=KDB14482.1] [location=431694..432596] [gbkey=CDS] - [JHTR01000023.1_prot_KDB14482.1_4753]	132.011	12.67	1	4	4	10	0.949348	0.937067	0.963653	1.02121	1.1313	1.02111	300	31.7283	6.02393	1.11352	0.0452211
UV8b_3956	[locus_tag=UV8b_3956] [protein=tho2 protein] [protein_id=KDB15116.1] [location=join(159777..163376,163439..164587,164646..164731,164792..165501,165623..166013,166093..166174)] [gbkey=CDS] - [JHTR01000018.1_prot_KDB15116.1_3956]	131.783	3.24	1	7	7	10	1.00087	0.980044	0.978671	1.0066	1.03348	1.0328	2005	226.061	6.69775	1.03828	0.0295385
UV8b_1117	[locus_tag=UV8b_1117] [protein=26S protease regulatory subunit 6B] [protein_id=KDB18269.1] [location=join(887880..888034,888132..888173,888284..888382,888458..889427)] [gbkey=CDS] - [JHTR01000003.1_prot_KDB18269.1_1117]	131.722	23.99	1	7	8	15	0.978931	0.991737	1.06334	0.963378	1.03847	0.987334	421	46.9455	5.61768	0.985226	0.686048
UV8b_4597	[locus_tag=UV8b_4597] [protein=putative phospholipid-transporting ATPase] [protein_id=KDB14547.1] [location=complement(join(431535..431709,431831..432498,432678..435896))] [gbkey=CDS] - [JHTR01000022.1_prot_KDB14547.1_4597]	131.663	4.66	1	5	5	7	0.956112	1.00072	1.07672	0.947854	1.03647	0.957183	1353	150.675	7.37158	0.969657	0.533241
UV8b_711	[locus_tag=UV8b_711] [protein=hypothetical protein] [protein_id=KDB18469.1] [location=complement(join(635816..635931,635989..636051,636151..636166,636232..636294))] [gbkey=CDS] - [JHTR01000002.1_prot_KDB18469.1_711]	131.188	30.59	1	3	3	13	0.985551	0.987589	1.01869	0.945134	1.08771	0.989697	85	9.55316	11.605	1.01026	0.82534
UV8b_2760	[locus_tag=UV8b_2760] [protein=glycogen debranching enzyme] [protein_id=KDB16304.1] [location=join(227064..231725,231855..231941)] [gbkey=CDS] - [JHTR01000011.1_prot_KDB16304.1_2760]	131.163	3.98	1	6	6	8	1.02259	0.972483	0.943451	1.05851	0.951635	1.03283	1582	177.083	5.87158	1.03555	0.429403
UV8b_6041	[locus_tag=UV8b_6041] [protein=hypothetical protein] [protein_id=KDB13041.1] [location=58611..60497] [gbkey=CDS] - [JHTR01000036.1_prot_KDB13041.1_6041]	130.984	10.19	1	4	4	6	0.981994	0.96097	1.07878	0.972635	1.03029	0.992581	628	67.8627	9.61279	0.991316	0.837705
UV8b_2097	[locus_tag=UV8b_2097] [protein=glutathione s-transferase] [protein_id=KDB17005.1] [location=complement(342079..342921)] [gbkey=CDS] - [JHTR01000008.1_prot_KDB17005.1_2097]	130.915	13.21	1	4	4	7	0.984934	0.968801	0.941005	1.07211	0.986015	1.00866	280	30.7853	5.10986	1.05944	0.117135
UV8b_2593	[locus_tag=UV8b_2593] [protein=protein phosphatases PP1 regulatory subunit sds22] [protein_id=KDB16558.1] [location=complement(join(270546..270673,270856..271734,271794..272034))] [gbkey=CDS] - [JHTR01000010.1_prot_KDB16558.1_2593]	130.741	15.18	1	5	5	9	0.987983	0.98146	1.03261	0.96829	1.01072	1.02206	415	46.6104	5.68115	0.999672	0.989259
UV8b_3045	[locus_tag=UV8b_3045] [protein=hypothetical protein] [protein_id=KDB16115.1] [location=complement(408557..409468)] [gbkey=CDS] - [JHTR01000012.1_prot_KDB16115.1_3045]	130.68	16.5	1	4	4	8	1.03633	0.964808	0.914879	1.1252	0.925921	1.01365	303	35.0668	5.56689	1.05101	0.503826
UV8b_6686	[locus_tag=UV8b_6686] [protein=hypothetical protein] [protein_id=KDB12462.1] [location=join(119999..120328,120399..121946)] [gbkey=CDS] - [JHTR01000044.1_prot_KDB12462.1_6686]	130.559	16.32	1	6	6	8	0.868358	0.884686	0.916084	1.11122	1.2042	1.11586	625	71.1352	5.03369	1.28554	0.00159143
UV8b_8314	[locus_tag=UV8b_8314] [protein=hypothetical protein] [protein_id=KDB10843.1] [location=join(19797..20520,20584..21074)] [gbkey=CDS] - [JHTR01000104.1_prot_KDB10843.1_8314]	130.531	16.09	1	5	5	7	1.17521	1.0445	0.914585	1.02708	0.764956	0.991318	404	45.7208	6.91748	0.888031	0.352671
UV8b_6434	[locus_tag=UV8b_6434] [protein=cytochrome c oxidase polypeptide V precursor] [protein_id=KDB12778.1] [location=join(253226..253454,253755..253948,254013..254099)] [gbkey=CDS] - [JHTR01000040.1_prot_KDB12778.1_6434]	130.46	25.44	1	3	3	11	0.980077	1.01085	1.08001	0.907708	1.05511	0.985544	169	18.7037	9.92041	0.960087	0.47458
UV8b_2349	[locus_tag=UV8b_2349] [protein=proliferating cell nuclear antigen] [protein_id=KDB16758.1] [location=join(369524..369572,369653..369876,369966..370444,370565..371016,371122..371747,372724..372897,372988..373417,373571..373860,373948..373965)] [gbkey=CDS] - [JHTR01000009.1_prot_KDB16758.1_2349]	130.236	7.78	1	5	5	9	0.973032	0.996706	0.967966	1.03064	0.913702	0.975441	913	100.605	5.8208	0.993898	0.872437
UV8b_4766	[locus_tag=UV8b_4766] [protein=proteasome component PUP3] [protein_id=KDB14495.1] [location=complement(join(473789..473932,474052..474483))] [gbkey=CDS] - [JHTR01000023.1_prot_KDB14495.1_4766]	130.201	25.65	1	3	3	7	1.12358	1.00837	0.911403	1.04297	0.835277	0.944834	191	21.1368	5.42725	0.927622	0.440289
UV8b_1454	[locus_tag=UV8b_1454] [protein=aldose 1-epimerase] [protein_id=KDB17570.1] [location=complement(join(289604..290016,290252..291187,291253..291397,291442..291510))] [gbkey=CDS] - [JHTR01000005.1_prot_KDB17570.1_1454]	130.144	13.65	1	5	5	11	0.870284	0.852888	0.93098	1.01376	1.18481	1.09554	520	56.417	6.63916	1.24112	0.0176221
UV8b_7681	[locus_tag=UV8b_7681] [protein=putative SRP receptor beta subunit (Srp102)] [protein_id=KDB11458.1] [location=70349..71206] [gbkey=CDS] - [JHTR01000068.1_prot_KDB11458.1_7681]	130.079	13.68	1	2	2	3	1.00997	0.996675	1.00069	1.05372	1.01507	1.05038	285	31.0493	6.55127	1.03719	0.0453092
UV8b_2153	[locus_tag=UV8b_2153] [protein=Mob1/phocein family protein] [protein_id=KDB17061.1] [location=join(502280..502495,502628..503884)] [gbkey=CDS] - [JHTR01000008.1_prot_KDB17061.1_2153]	129.838	7.14	1	2	2	3	1.01691	0.972243	0.954325	1.0616	0.998977	0.963794	490	52.8928	4.91943	1.02748	0.473619
UV8b_5647	[locus_tag=UV8b_5647] [protein=putative cystathionine beta-synthase] [protein_id=KDB13549.1] [location=join(282629..282718,282894..283319)] [gbkey=CDS] - [JHTR01000031.1_prot_KDB13549.1_5647]	129.823	22.22	1	3	3	9	0.952879	0.973919	0.973767	1.0529	1.04638	1.02769	171	19.1068	6.34131	1.07805	0.00184032
UV8b_6933	[locus_tag=UV8b_6933] [protein=putative Ran exchange factor Prp20/Pim1] [protein_id=KDB12229.1] [location=complement(join(171073..171939,172070..172806,172934..173060))] [gbkey=CDS] - [JHTR01000048.1_prot_KDB12229.1_6933]	129.68	18.58	2	9	10	16	0.957437	0.988	0.937289	1.07332	1.04524	1.05955	576	62.0145	8.29443	1.10247	0.00425206
UV8b_7745	[locus_tag=UV8b_7745] [protein=pseudouridine synthase TruD/Pus7] [protein_id=KDB11432.1] [location=complement(join(125080..127035,127137..127229,127300..127410))] [gbkey=CDS] - [JHTR01000071.1_prot_KDB11432.1_7745]	129.367	14.74	1	8	8	11	1.01125	1.01654	0.986812	0.992284	1.00127	1.00718	719	79.2025	6.50732	0.995401	0.671819
UV8b_5862	[locus_tag=UV8b_5862] [protein=D-amino-acid oxidase] [protein_id=KDB13272.1] [location=complement(159487..160284)] [gbkey=CDS] - [JHTR01000033.1_prot_KDB13272.1_5862]	129.274	10.57	1	3	3	7	1.02048	1.06249	1.07026	0.915859	0.956596	0.937109	265	28.8176	6.60986	0.891012	0.00413667
[truncated: 2,783 more rows]
