# Supplementary material for: Quantitative Proteomics Analysis Reveals the Function of the Putative Ester Cyclase UvEC1 in the Pathogenicity of the Rice False Smut Fungus Ustilaginoidea virens
Source: Int J Mol Sci. 2021 Apr 15;22(8):4069. doi: 10.3390/ijms22084069 (PMC8071170; doi:10.3390/ijms22084069)
Supplement: Supplementary file 1 [file ijms-22-04069-s001.zip › ijms-1183058-supplementary table S3.xlsx]

## Sheet: down
Accession	Description	Score	Coverage	# Proteins	# Unique Peptides	# Peptides	# PSMs	WT-1/ref	WT-2/ref	WT-3/ref	UvEC1-1/ref	UvEC1-2/ref	UvEC1-3/ref	# AAs	MW [kDa]	calc. pI	Ratio(UvEC1/WT)	Pvalue(UvEC1/WT)
UV8b_4649	[locus_tag=UV8b_4649] [protein=ester cyclase] [protein_id=KDB14378.1] [location=125330..125731] [gbkey=CDS] - [JHTR01000023.1_prot_KDB14378.1_4649]	34.41	21.8	1	2	2	2	1.23946	1.31735	1.30522	0.673663	0.642543	0.703954	133	15.0263	4.93213	0.523081	3.36454e-05
UV8b_1980	[locus_tag=UV8b_1980] [protein=WD repeat-containing protein 79] [protein_id=KDB17383.1] [location=complement(813113..814447)] [gbkey=CDS] - [JHTR01000007.1_prot_KDB17383.1_1980]	0	1.58	1	1	1	1	1.21926	1.39008	1.16416	0.715785	0.719355	0.685432	444	47.1392	6.21436	0.561963	0.00132274
UV8b_8247	[locus_tag=UV8b_8247] [protein=hypothetical protein] [protein_id=KDB10909.1] [location=complement(join(31877..32337,32441..32803,32881..32938,33043..33081))] [gbkey=CDS] - [JHTR01000095.1_prot_KDB10909.1_8247]	25.7	3.27	1	1	1	1	1.23062	1.28006	1.26933	0.715851	0.711308	0.701491	306	34.7094	8.14795	0.563133	3.85006e-06
UV8b_2458	[locus_tag=UV8b_2458] [protein=glucose repressible protein Grg1] [protein_id=KDB16867.1] [location=complement(join(715754..715841,715924..716045))] [gbkey=CDS] - [JHTR01000009.1_prot_KDB16867.1_2458]	71.75	40.58	1	6	6	12	1.23289	1.29725	1.22518	0.685084	0.735633	0.696941	69	7.21966	8.44092	0.563908	3.78691e-05
UV8b_3965	[locus_tag=UV8b_3965] [protein=cell surface flocculin] [protein_id=KDB15125.1] [location=246385..249180] [gbkey=CDS] - [JHTR01000018.1_prot_KDB15125.1_3965]	25.01	2.47	1	1	1	2	1.21334	1.24719	1.28125	0.686574	0.758088	0.716812	931	93.4092	5.30029	0.577659	5.06246e-05
UV8b_6673	[locus_tag=UV8b_6673] [protein=cell wall glycoprotein] [protein_id=KDB12449.1] [location=complement(81889..82809)] [gbkey=CDS] - [JHTR01000044.1_prot_KDB12449.1_6673]	182.771	13.73	1	2	2	6	1.20378	1.30288	1.21233	0.733348	0.746828	0.745889	306	30.1574	7.47412	0.598566	9.98447e-05
UV8b_2070	[locus_tag=UV8b_2070] [protein=40s ribosomal protein S30] [protein_id=KDB16978.1] [location=join(253976..254009,254072..254097,254227..254331,254397..254420)] [gbkey=CDS] - [JHTR01000008.1_prot_KDB16978.1_2070]	115.681	17.74	1	1	1	4	1.24565	1.25917	1.14934	0.76472	0.74154	0.738893	62	6.82388	11.7661	0.61441	0.000189369
UV8b_8012	[locus_tag=UV8b_8012] [protein=protein transport protein sec22] [protein_id=KDB11150.1] [location=complement(109392..110015)] [gbkey=CDS] - [JHTR01000079.1_prot_KDB11150.1_8012]	92.0242	12.08	1	3	3	7	1.18928	1.17664	1.29119	0.779042	0.77044	0.743945	207	23.4851	8.70459	0.627116	0.000273227
UV8b_5319	[locus_tag=UV8b_5319] [protein=Kazal domain-containing protein] [protein_id=KDB13985.1] [location=complement(481716..482138)] [gbkey=CDS] - [JHTR01000028.1_prot_KDB13985.1_5319]	0	6.43	1	1	1	1	1.21459	1.23693	1.12674	0.811834	0.706096	0.807312	140	14.5359	8.00146	0.649826	0.00097522
UV8b_2261	[locus_tag=UV8b_2261] [protein=hypothetical protein] [protein_id=KDB16670.1] [location=complement(join(67930..68167,68268..68564,68686..68969))] [gbkey=CDS] - [JHTR01000009.1_prot_KDB16670.1_2261]	25.46	6.62	1	1	1	1	1.29616	1.24454	1.00331	0.893873	0.62789	0.784116	272	31.159	9.37842	0.650642	0.025456
UV8b_657	[locus_tag=UV8b_657] [protein=putative CDP-diacylglycerol--inositol 3-phosphatidyltransferase] [protein_id=KDB18415.1] [location=complement(join(490715..491110,491200..491576,491708..491891))] [gbkey=CDS] - [JHTR01000002.1_prot_KDB18415.1_657]	21.01	4.09	1	1	1	1	1.22826	1.273	1.01513	0.950561	0.717467	0.68634	318	35.3881	9.14404	0.66954	0.0282735
UV8b_5532	[locus_tag=UV8b_5532] [protein=ectomycorrhiza-regulated small secreted protein] [protein_id=KDB13700.1] [location=complement(314001..314534)] [gbkey=CDS] - [JHTR01000030.1_prot_KDB13700.1_5532]	21.06	9.04	1	2	2	6	1.16862	1.1635	1.16429	0.820039	0.746706	0.791505	177	19.9399	4.57666	0.674477	5.9489e-05
UV8b_3481	[locus_tag=UV8b_3481] [protein=pentatricopeptide repeat containing protein] [protein_id=KDB15841.1] [location=632866..634641] [gbkey=CDS] - [JHTR01000014.1_prot_KDB15841.1_3481]	21.62	1.69	1	1	1	1	0.934514	1.29614	1.34233	0.807163	0.832942	0.79517	591	67.5639	9.86182	0.68158	0.0427945
UV8b_4182	[locus_tag=UV8b_4182] [protein=serum paraoxonase/arylesterase family protein] [protein_id=KDB15036.1] [location=join(404294..404632,404718..405683)] [gbkey=CDS] - [JHTR01000019.1_prot_KDB15036.1_4182]	290.195	23.5	1	7	7	21	1.16667	1.15809	1.16786	0.820572	0.799078	0.785728	434	47.5954	7.04932	0.688703	4.37551e-06
UV8b_1907	[locus_tag=UV8b_1907] [protein=pyridoxine] [protein_id=KDB17310.1] [location=complement(join(572946..573396,573464..573696))] [gbkey=CDS] - [JHTR01000007.1_prot_KDB17310.1_1907]	44.13	3.08	1	1	1	2	1.13924	1.19531	1.17545	0.796407	0.814311	0.83131	227	24.354	6.69775	0.695734	5.04061e-05
UV8b_7731	[locus_tag=UV8b_7731] [protein=secreted aspartic proteinase precursor] [protein_id=KDB11418.1] [location=join(82858..83584,83649..84148)] [gbkey=CDS] - [JHTR01000071.1_prot_KDB11418.1_7731]	47.03	5.64	1	1	1	1	1.15326	1.13908	1.17814	0.865346	0.784668	0.82217	408	42.9063	6.62451	0.712348	0.000213331
UV8b_1036	[locus_tag=UV8b_1036] [protein=beta-1,3-glucanosyltransferase] [protein_id=KDB18188.1] [location=join(631764..631835,631915..632749,632963..633606)] [gbkey=CDS] - [JHTR01000003.1_prot_KDB18188.1_1036]	31.23	4.65	1	2	2	3	1.05988	1.14707	1.20737	0.761832	0.88957	0.801195	516	54.1748	4.86865	0.718325	0.00494326
UV8b_3635	[locus_tag=UV8b_3635] [protein=alpha-ketoglutarate-dependent taurine dioxygenase] [protein_id=KDB15604.1] [location=join(416767..416916,417036..417768,417836..418089)] [gbkey=CDS] - [JHTR01000015.1_prot_KDB15604.1_3635]	996.602	50	2	18	18	59	1.11489	1.14772	1.16182	0.83068	0.824012	0.828411	378	42.3203	6.52197	0.725116	2.37288e-05
UV8b_359	[locus_tag=UV8b_359] [protein=alcohol dehydrogenase] [protein_id=KDB18968.1] [location=join(1553186..1553283,1553355..1553916,1553971..1553999,1554061..1554153,1554279..1554375)] [gbkey=CDS] - [JHTR01000001.1_prot_KDB18968.1_359]	659.61	25.34	1	5	5	25	1.19173	1.13708	1.10855	0.869919	0.815386	0.822418	292	31.756	5.8208	0.72955	0.000483863
UV8b_1189	[locus_tag=UV8b_1189] [protein=60S acidic ribosomal protein P2] [protein_id=KDB17822.1] [location=complement(join(107898..108077,108183..108341))] [gbkey=CDS] - [JHTR01000004.1_prot_KDB17822.1_1189]	63.6408	17.86	1	1	1	3	1.14665	1.15268	1.08997	0.900824	0.846721	0.753233	112	11.0104	4.33545	0.737844	0.00337359
UV8b_2896	[locus_tag=UV8b_2896] [protein=UPF0187 domain membrane protein] [protein_id=KDB16440.1] [location=complement(628864..630306)] [gbkey=CDS] - [JHTR01000011.1_prot_KDB16440.1_2896]	24.36	3.33	1	2	2	2	1.07867	1.14784	1.21787	0.798864	0.910052	0.839576	480	53.2596	8.19189	0.739897	0.00445111
UV8b_2374	[locus_tag=UV8b_2374] [protein=putative thioredoxin] [protein_id=KDB16783.1] [location=join(441995..442076,442265..442815,442876..443208)] [gbkey=CDS] - [JHTR01000009.1_prot_KDB16783.1_2374]	32.79	3.74	1	1	1	2	1.09431	1.14992	1.1872	0.814573	0.852636	0.877547	321	35.4452	5.04639	0.741601	0.000821806
UV8b_7945	[locus_tag=UV8b_7945] [protein=putative S-adenosylmethionine-dependent methyltransferase] [protein_id=KDB11212.1] [location=complement(88044..89210)] [gbkey=CDS] - [JHTR01000077.1_prot_KDB11212.1_7945]	0	2.32	1	1	1	2	1.13295	1.1338	1.15402	0.842881	0.859834	0.835113	388	42.4164	5.19873	0.741886	8.04692e-06
UV8b_5790	[locus_tag=UV8b_5790] [protein=hypothetical protein] [protein_id=KDB13411.1] [location=complement(294006..297356)] [gbkey=CDS] - [JHTR01000032.1_prot_KDB13411.1_5790]	29	0.63	1	1	1	1	1.19206	1.15767	1.05372	0.846155	0.793722	0.885877	1116	122.715	8.14795	0.742116	0.00407479
UV8b_6956	[locus_tag=UV8b_6956] [protein=Cel3c putative beta-glucosidase] [protein_id=KDB12252.1] [location=complement(join(237206..239649,239778..239847))] [gbkey=CDS] - [JHTR01000048.1_prot_KDB12252.1_6956]	263.718	8.72	1	7	7	21	1.16471	1.15498	1.0783	0.890433	0.77846	0.853349	837	90.9655	5.31299	0.742275	0.00241434
UV8b_605	[locus_tag=UV8b_605] [protein=4-hydroxyphenylpyruvate dioxygenase] [protein_id=KDB18363.1] [location=complement(300740..301984)] [gbkey=CDS] - [JHTR01000002.1_prot_KDB18363.1_605]	327.689	27.29	3	9	10	22	1.15525	1.11847	1.11675	0.879922	0.803535	0.840812	414	45.486	6.29053	0.744519	0.000340311
UV8b_4800	[locus_tag=UV8b_4800] [protein=hypothetical protein] [protein_id=KDB14205.1] [location=complement(join(29425..29840,29906..30262,30458..30773))] [gbkey=CDS] - [JHTR01000024.1_prot_KDB14205.1_4800]	28.8	3.04	1	1	1	1	1.07544	1.1631	1.18551	0.846713	0.829333	0.873792	362	40.4387	7.48877	0.744685	0.00126485
UV8b_3251	[locus_tag=UV8b_3251] [protein=small nuclear ribonucleoprotein] [protein_id=KDB15939.1] [location=complement(join(415248..415463,415579..415629,415712..415813))] [gbkey=CDS] - [JHTR01000013.1_prot_KDB15939.1_3251]	0	5.74	1	1	1	1	1.09573	1.13823	1.19142	0.830602	0.850814	0.869768	122	13.0666	10.3892	0.74479	0.000621075
UV8b_3277	[locus_tag=UV8b_3277] [protein=high-affinity glucose transporter snf3] [protein_id=KDB15965.1] [location=join(498611..498700,498800..499102,499250..500419)] [gbkey=CDS] - [JHTR01000013.1_prot_KDB15965.1_3277]	30.32	5.96	1	2	2	2	1.14093	1.14353	1.11055	0.857554	0.828172	0.850548	520	57.0395	7.56201	0.74706	3.19507e-05
UV8b_5588	[locus_tag=UV8b_5588] [protein=putative RNA polymerase II transcription factor SIII (Elongin) subunit A,putative] [protein_id=KDB13490.1] [location=101859..103208] [gbkey=CDS] - [JHTR01000031.1_prot_KDB13490.1_5588]	0	1.11	1	1	1	1	1.25985	1.11072	0.992776	0.953321	0.761072	0.814139	449	48.433	9.92041	0.751791	0.044463
UV8b_1785	[locus_tag=UV8b_1785] [protein=TORC1 growth control complex subunit Kog1] [protein_id=KDB17188.1] [location=complement(join(132559..132775,133049..136662,136895..137275))] [gbkey=CDS] - [JHTR01000007.1_prot_KDB17188.1_1785]	16.19	0.86	3	1	2	3	1.04336	1.22984	1.13699	0.874644	0.923711	0.772255	1403	159.134	6.94678	0.753803	0.0160939
UV8b_830	[locus_tag=UV8b_830] [protein=hypothetical protein] [protein_id=KDB18588.1] [location=complement(join(1006320..1006463,1006540..1006723,1006834..1006885,1006999..1007122))] [gbkey=CDS] - [JHTR01000002.1_prot_KDB18588.1_830]	323.326	47.31	1	8	9	32	1.11597	1.11986	1.14432	0.855988	0.843693	0.852067	167	18.5017	8.96826	0.754919	8.64274e-06
UV8b_1286	[locus_tag=UV8b_1286] [protein=pre-mRNA-splicing factor spp2] [protein_id=KDB17919.1] [location=complement(489159..490229)] [gbkey=CDS] - [JHTR01000004.1_prot_KDB17919.1_1286]	18.64	2.53	1	1	1	1	1.17272	1.11374	1.11423	0.798114	0.922167	0.847029	356	38.8403	9.1001	0.754937	0.00248704
UV8b_2560	[locus_tag=UV8b_2560] [protein=60S ribosomal protein L34] [protein_id=KDB16525.1] [location=join(173249..173286,173386..173509,173764..173952)] [gbkey=CDS] - [JHTR01000010.1_prot_KDB16525.1_2560]	173.654	41.38	1	6	7	29	1.12353	1.12276	1.14606	0.862481	0.83068	0.871473	116	13.3144	10.9019	0.756005	4.54725e-05
UV8b_5441	[locus_tag=UV8b_5441] [protein=hypothetical protein] [protein_id=KDB13609.1] [location=complement(join(51434..51791,51872..52280,52359..52590))] [gbkey=CDS] - [JHTR01000030.1_prot_KDB13609.1_5441]	0	4.52	1	1	1	1	1.17256	1.13469	1.04451	0.981337	0.752275	0.827101	332	37.1408	9.48096	0.76399	0.0271041
UV8b_888	[locus_tag=UV8b_888] [protein=ribonuclease subunit b] [protein_id=KDB18040.1] [location=complement(140952..142277)] [gbkey=CDS] - [JHTR01000003.1_prot_KDB18040.1_888]	37.79	2.04	1	1	1	1	1.15301	1.10571	1.1135	0.887341	0.82983	0.860406	441	48.2866	7.78174	0.764356	0.000279976
UV8b_7118	[locus_tag=UV8b_7118] [protein=Sulfatase domain containing protein] [protein_id=KDB12032.1] [location=join(94731..94963,95297..95541,95607..97777)] [gbkey=CDS] - [JHTR01000052.1_prot_KDB12032.1_7118]	0	2.83	1	2	2	2	1.13815	1.10869	1.12084	0.890392	0.850548	0.839584	882	99.6451	6.69775	0.766261	0.000119121
UV8b_3637	[locus_tag=UV8b_3637] [protein=class v chitinase] [protein_id=KDB15606.1] [location=complement(join(419177..420248,420372..420472,420537..420778,420834..421378,421505..421667,421744..421870,422013..422081))] [gbkey=CDS] - [JHTR01000015.1_prot_KDB15606.1_3637]	632.261	21.76	1	15	15	40	1.06768	1.11137	1.16806	0.875473	0.880384	0.812256	772	85.7614	8.82178	0.767261	0.00204399
UV8b_5407	[locus_tag=UV8b_5407] [protein=putative tubulin-specific chaperone c] [protein_id=KDB13800.1] [location=complement(join(377301..377504,377571..378242,378347..378507,378601..378649))] [gbkey=CDS] - [JHTR01000029.1_prot_KDB13800.1_5407]	121.52	8.31	1	2	2	3	1.08328	1.10786	1.18365	0.845387	0.858164	0.88959	361	40.2891	6.01123	0.768385	0.00138194
UV8b_3754	[locus_tag=UV8b_3754] [protein=putative nuclear migration protein ami1] [protein_id=KDB15328.1] [location=complement(join(160365..161422,161605..164497))] [gbkey=CDS] - [JHTR01000016.1_prot_KDB15328.1_3754]	0	0.99	1	1	1	1	1.10903	1.1018	1.16478	0.805261	0.912026	0.896822	1316	143.476	9.30518	0.77441	0.00282979
UV8b_2481	[locus_tag=UV8b_2481] [protein=fatty acid desaturase] [protein_id=KDB16890.1] [location=join(796779..797080,797183..798677)] [gbkey=CDS] - [JHTR01000009.1_prot_KDB16890.1_2481]	65.1659	3.01	1	2	2	3	1.11268	1.06006	1.21655	0.887547	0.864685	0.878369	598	66.0472	8.68994	0.776151	0.00552782
UV8b_654	[locus_tag=UV8b_654] [protein=putative iron transferase] [protein_id=KDB18412.1] [location=complement(join(483526..483816,483906..484104,484188..484627,484743..484898))] [gbkey=CDS] - [JHTR01000002.1_prot_KDB18412.1_654]	21.54	1.94	1	1	1	1	1.12775	1.07208	1.15476	0.88439	0.876974	0.855026	361	38.8182	8.47021	0.779945	0.000683904
UV8b_5644	[locus_tag=UV8b_5644] [protein=yos1-like protein] [protein_id=KDB13546.1] [location=join(273146..273985,274280..274357)] [gbkey=CDS] - [JHTR01000031.1_prot_KDB13546.1_5644]	21.24	2.95	1	1	1	1	1.03322	1.09161	1.24545	0.871885	0.876202	0.884387	305	32.9502	9.51025	0.781084	0.017858
UV8b_3532	[locus_tag=UV8b_3532] [protein=hypothetical protein] [protein_id=KDB15501.1] [location=complement(join(120878..121175,121300..122303))] [gbkey=CDS] - [JHTR01000015.1_prot_KDB15501.1_3532]	0	1.85	1	1	1	1	1.07402	1.13543	1.15008	0.846911	0.904062	0.877619	433	47.5352	9.36377	0.782426	0.00103557
UV8b_54	[locus_tag=UV8b_54] [protein=acetamidase] [protein_id=KDB18663.1] [location=complement(join(199305..199401,199528..199751,199818..199910,200005..200075,200150..200290,200375..201443,201497..201541,201657..201968))] [gbkey=CDS] - [JHTR01000001.1_prot_KDB18663.1_54]	164.161	12.15	1	5	6	11	1.12598	1.08349	1.12635	0.898249	0.850966	0.864374	683	74.5106	7.00537	0.783491	0.000273442
UV8b_2979	[locus_tag=UV8b_2979] [protein=kinase domain containing protein] [protein_id=KDB16049.1] [location=complement(join(212945..215133,215200..215596,215694..216680))] [gbkey=CDS] - [JHTR01000012.1_prot_KDB16049.1_2979]	27.7685	2.69	1	2	2	2	1.13543	1.11395	1.07326	0.927554	0.844515	0.838157	1190	131.667	5.18604	0.785588	0.00223077
UV8b_7960	[locus_tag=UV8b_7960] [protein=putative OPY2 protein] [protein_id=KDB11227.1] [location=join(128542..128596,128689..129992)] [gbkey=CDS] - [JHTR01000077.1_prot_KDB11227.1_7960]	0	1.99	1	1	1	1	1.14413	1.12154	1.06947	0.872518	0.879405	0.871369	452	46.5149	8.44092	0.786562	0.000437848
UV8b_5418	[locus_tag=UV8b_5418] [protein=Cytochrome P450 family protein] [protein_id=KDB13811.1] [location=complement(join(404801..406170,406271..406421,406605..406670))] [gbkey=CDS] - [JHTR01000029.1_prot_KDB13811.1_5418]	30.71	8.33	1	5	5	6	1.13274	1.1102	1.0779	0.908621	0.868586	0.838148	528	59.6812	8.92432	0.78756	0.000813169
UV8b_4423	[locus_tag=UV8b_4423] [protein=40S ribosomal protein S13] [protein_id=KDB14900.1] [location=complement(join(542391..542564,542647..542693,542818..542850,542925..543126))] [gbkey=CDS] - [JHTR01000020.1_prot_KDB14900.1_4423]	284.957	22.52	1	4	4	21	1.12347	1.09374	1.15446	0.928942	0.853668	0.879154	151	16.7984	10.4331	0.789451	0.00110533
UV8b_7705	[locus_tag=UV8b_7705] [protein=hypothetical protein] [protein_id=KDB11449.1] [location=117041..118102] [gbkey=CDS] - [JHTR01000069.1_prot_KDB11449.1_7705]	28.6976	5.95	1	2	2	2	1.15079	1.06721	1.09892	0.924644	0.838795	0.862781	353	41.4391	7.44482	0.791763	0.00285936
UV8b_309	[locus_tag=UV8b_309] [protein=profilin] [protein_id=KDB18918.1] [location=join(1055178..1055309,1055407..1055541)] [gbkey=CDS] - [JHTR01000001.1_prot_KDB18918.1_309]	28.0879	30.68	1	2	2	2	1.09305	1.15007	1.07998	0.919863	0.833814	0.877757	88	9.1938	9.08545	0.79186	0.00217422
UV8b_229	[locus_tag=UV8b_229] [protein=putative HAD superfamily hydrolase] [protein_id=KDB18838.1] [location=join(728274..728282,728539..729288)] [gbkey=CDS] - [JHTR01000001.1_prot_KDB18838.1_229]	98.8254	21.83	1	5	6	11	1.08286	1.11178	1.13879	0.859862	0.907746	0.875204	252	27.362	5.10986	0.792821	0.000427096
UV8b_7789	[locus_tag=UV8b_7789] [protein=d-3-phosphoglycerate dehydrogenase] [protein_id=KDB11396.1] [location=109513..111234] [gbkey=CDS] - [JHTR01000072.1_prot_KDB11396.1_7789]	107.154	2.62	1	1	1	5	1.14436	1.01238	1.17515	0.900888	0.869506	0.87136	573	60.6332	6.85889	0.792868	0.0106956
UV8b_3318	[locus_tag=UV8b_3318] [protein=ferric reductase like transmembrane component] [protein_id=KDB15678.1] [location=complement(join(94606..94699,94792..96175,96266..96716))] [gbkey=CDS] - [JHTR01000014.1_prot_KDB15678.1_3318]	35.87	3.12	1	2	2	3	1.18002	1.10832	0.992373	0.945287	0.802232	0.865208	642	70.2167	9.75928	0.79639	0.0314628
UV8b_3472	[locus_tag=UV8b_3472] [protein=putative 3,2-trans-enoyl-CoA isomerase precursor] [protein_id=KDB15832.1] [location=601935..602438] [gbkey=CDS] - [JHTR01000014.1_prot_KDB15832.1_3472]	41.7086	8.98	1	2	2	2	1.051	1.11454	1.16712	0.877777	0.889959	0.889052	167	18.5916	8.6167	0.797196	0.00263181
UV8b_6506	[locus_tag=UV8b_6506] [protein=STF2-like protein] [protein_id=KDB12660.1] [location=join(166700..166742,167617..167773,167854..168073)] [gbkey=CDS] - [JHTR01000041.1_prot_KDB12660.1_6506]	264.842	31.65	1	5	5	14	1.09251	1.09358	1.14025	0.850467	0.9206	0.883521	139	15.3384	6.41748	0.798049	0.000948827
UV8b_2608	[locus_tag=UV8b_2608] [protein=phosphoenolpyruvate carboxykinase] [protein_id=KDB16573.1] [location=complement(join(316190..317533,318288..318488,318554..318629,318771..318819,318958..319057))] [gbkey=CDS] - [JHTR01000010.1_prot_KDB16573.1_2608]	956.869	39.56	1	15	15	47	1.10226	1.07839	1.11871	0.894558	0.874094	0.865749	589	65.7409	6.49365	0.798457	0.000106808
UV8b_2275	[locus_tag=UV8b_2275] [protein=putative SNF2 family helicase/ATPase] [protein_id=KDB16684.1] [location=complement(join(109786..110978,111056..112997))] [gbkey=CDS] - [JHTR01000009.1_prot_KDB16684.1_2275]	0	0.96	1	1	1	1	1.15455	1.0769	1.07025	0.963289	0.805193	0.868005	1044	117.115	6.81494	0.798525	0.0141725
UV8b_2651	[locus_tag=UV8b_2651] [protein=alpha-methylacyl-CoA racemase] [protein_id=KDB16616.1] [location=complement(join(527424..528541,528689..528767,529465..529672,529782..530401))] [gbkey=CDS] - [JHTR01000010.1_prot_KDB16616.1_2651]	28.72	2.37	1	1	1	1	1.12868	1.08004	1.10587	0.909884	0.911281	0.833333	674	73.9208	8.646	0.800853	0.00169058
UV8b_3125	[locus_tag=UV8b_3125] [protein=ankyrin repeat domain containing protein] [protein_id=KDB16195.1] [location=645523..648231] [gbkey=CDS] - [JHTR01000012.1_prot_KDB16195.1_3125]	166.493	15.19	1	10	10	19	1.11273	1.10916	1.08407	0.915658	0.863597	0.873646	902	97.1579	6.93213	0.802461	0.000287172
UV8b_5952	[locus_tag=UV8b_5952] [protein=CFEM domain-containing protein] [protein_id=KDB13192.1] [location=join(198095..198133,198202..198319,198401..199088,199260..199463,199534..199705)] [gbkey=CDS] - [JHTR01000034.1_prot_KDB13192.1_5952]	37.79	2.22	1	1	1	1	1.09132	1.10073	1.12099	0.883762	0.883936	0.898439	406	45.5998	8.54346	0.804741	2.75333e-05
UV8b_2953	[locus_tag=UV8b_2953] [protein=hypothetical protein] [protein_id=KDB16023.1] [location=complement(join(140634..142013,142114..144618))] [gbkey=CDS] - [JHTR01000012.1_prot_KDB16023.1_2953]	40.9573	2.86	1	3	3	5	1.1313	1.09507	1.04877	0.904455	0.799744	0.943781	1294	137.151	8.82178	0.808508	0.0131441
UV8b_8060	[locus_tag=UV8b_8060] [protein=beta-lactamase family protein] [protein_id=KDB11072.1] [location=complement(join(48091..48258,48333..48443,48511..48576))] [gbkey=CDS] - [JHTR01000081.1_prot_KDB11072.1_8060]	313.856	41.23	1	3	3	15	1.06349	1.12556	1.10995	0.887729	0.87479	0.911552	114	12.4231	5.45264	0.810571	0.000638091
UV8b_7168	[locus_tag=UV8b_7168] [protein=glutamate carboxypeptidase] [protein_id=KDB11939.1] [location=join(35514..38048,38116..38307)] [gbkey=CDS] - [JHTR01000054.1_prot_KDB11939.1_7168]	61.9827	0.77	1	1	1	2	1.10463	1.10002	1.08646	0.900683	0.876199	0.893213	908	101.788	5.41455	0.811306	2.18006e-05
UV8b_3331	[locus_tag=UV8b_3331] [protein=membrane fusion mating protein fig1] [protein_id=KDB15691.1] [location=join(139528..139988,140044..140413)] [gbkey=CDS] - [JHTR01000014.1_prot_KDB15691.1_3331]	0	5.07	1	1	1	1	1.08778	1.12543	1.07951	0.928416	0.85756	0.886524	276	29.9656	5.79541	0.811639	0.00115887
UV8b_2260	[locus_tag=UV8b_2260] [protein=succinate semialdehyde dehydrogenase] [protein_id=KDB16669.1] [location=complement(join(64887..65901,66067..66436,66546..66672))] [gbkey=CDS] - [JHTR01000009.1_prot_KDB16669.1_2260]	426.18	22.47	1	8	8	18	1.08568	1.09864	1.12751	0.916203	0.868672	0.903529	503	53.6944	6.46826	0.81176	0.000383704
UV8b_1952	[locus_tag=UV8b_1952] [protein=Cutinase gene palindrome-binding protein] [protein_id=KDB17355.1] [location=complement(join(714670..714828,714904..715079,715216..715374,715461..715472,715804..715951,717330..717457,717532..718777,718881..719009))] [gbkey=CDS] - [JHTR01000007.1_prot_KDB17355.1_1952]	276.704	16.02	1	5	5	7	1.12085	1.07621	1.03551	0.881404	0.842851	0.900364	718	77.2226	6.31592	0.811929	0.00247205
UV8b_4070	[locus_tag=UV8b_4070] [protein=cellular nucleic acid-binding protein] [protein_id=KDB14924.1] [location=join(43335..43461,44127..44204,44309..44328,44387..44421,44485..44498,44567..44581,44635..44768,44846..44981,45051..45196)] [gbkey=CDS] - [JHTR01000019.1_prot_KDB14924.1_4070]	382.765	28.21	1	5	5	12	1.12517	1.11437	1.02107	0.916499	0.846095	0.885504	234	24.3927	8.04541	0.812149	0.00625876
UV8b_3219	[locus_tag=UV8b_3219] [protein=rhodanese domain-containing protein] [protein_id=KDB15907.1] [location=complement(join(292413..292768,292893..293169))] [gbkey=CDS] - [JHTR01000013.1_prot_KDB15907.1_3219]	29.77	10	1	2	2	3	1.06938	1.08415	1.13211	0.808005	0.965354	0.89647	210	22.1685	10.4331	0.812578	0.0141225
UV8b_2400	[locus_tag=UV8b_2400] [protein=putative Snf1 kinase complex beta-subunit Gal83] [protein_id=KDB16809.1] [location=535959..536456] [gbkey=CDS] - [JHTR01000009.1_prot_KDB16809.1_2400]	0	6.67	1	1	1	1	1.09512	1.1244	1.07857	0.878237	0.934504	0.870025	165	17.6529	5.85889	0.813429	0.00107791
UV8b_4571	[locus_tag=UV8b_4571] [protein=ribosome biogenesis protein Rrp14-C] [protein_id=KDB14715.1] [location=complement(552920..554257)] [gbkey=CDS] - [JHTR01000021.1_prot_KDB14715.1_4571]	0	5.62	1	2	2	2	1.07742	1.09407	1.10229	0.877009	0.89906	0.890804	445	49.6061	9.75928	0.814616	3.17616e-05
UV8b_3322	[locus_tag=UV8b_3322] [protein=putative VanZ domain protein] [protein_id=KDB15682.1] [location=109168..109776] [gbkey=CDS] - [JHTR01000014.1_prot_KDB15682.1_3322]	35.71	6.44	1	1	1	1	1.13425	1.13406	1.01314	0.903214	0.887282	0.883182	202	22.379	4.7417	0.814785	0.00767537
UV8b_1686	[locus_tag=UV8b_1686] [protein=FKH1-like protein] [protein_id=KDB17429.1] [location=complement(join(144500..144581,144673..145490,145586..146632))] [gbkey=CDS] - [JHTR01000006.1_prot_KDB17429.1_1686]	0	1.08	1	1	1	1	1.09208	1.14248	1.04944	0.936506	0.863547	0.87601	648	70.5667	9.78857	0.814881	0.00446059
UV8b_1469	[locus_tag=UV8b_1469] [protein=chromosome segregation ATPase] [protein_id=KDB17585.1] [location=join(332641..332753,332974..338761)] [gbkey=CDS] - [JHTR01000005.1_prot_KDB17585.1_1469]	41.55	2.24	1	3	3	3	1.09215	1.10834	1.09375	0.888891	0.90159	0.896233	1966	217.066	4.77979	0.815578	5.69018e-06
UV8b_7288	[locus_tag=UV8b_7288] [protein=DNA-directed RNA polymerase] [protein_id=KDB11865.1] [location=join(129095..133279,133386..133436)] [gbkey=CDS] - [JHTR01000057.1_prot_KDB11865.1_7288]	0	0.64	1	1	1	1	1.13476	1.07837	1.0688	0.911465	0.856652	0.90953	1411	157.206	7.76709	0.815876	0.00180139
UV8b_5097	[locus_tag=UV8b_5097] [protein=tyrosyl-tRNA synthetase] [protein_id=KDB14108.1] [location=join(355827..355876,355908..356193,356286..356561)] [gbkey=CDS] - [JHTR01000026.1_prot_KDB14108.1_5097]	40.92	14.78	1	2	2	3	1.06667	1.09647	1.12726	0.906178	0.880088	0.898562	203	21.6786	8.19189	0.815957	0.000456195
UV8b_1020	[locus_tag=UV8b_1020] [protein=hypothetical protein] [protein_id=KDB18172.1] [location=592249..593832] [gbkey=CDS] - [JHTR01000003.1_prot_KDB18172.1_1020]	0	2.47	1	1	1	1	1.04412	1.10049	1.16478	0.862745	0.977767	0.861285	527	56.8239	8.76318	0.816403	0.0176184
UV8b_1581	[locus_tag=UV8b_1581] [protein=40S ribosomal protein S9] [protein_id=KDB17697.1] [location=complement(join(685653..686064,686161..686259,686343..686407))] [gbkey=CDS] - [JHTR01000005.1_prot_KDB17697.1_1581]	311.014	43.98	1	11	11	36	1.1172	1.08652	1.04634	0.922785	0.871594	0.865874	191	21.9671	10.4478	0.818524	0.00198545
UV8b_6813	[locus_tag=UV8b_6813] [protein=putative MFS transporter] [protein_id=KDB12326.1] [location=complement(join(84008..84078,84168..84335,84425..85793,85950..86050,86239..86284))] [gbkey=CDS] - [JHTR01000046.1_prot_KDB12326.1_6813]	137.116	3.94	1	2	2	6	1.06365	1.09922	1.07707	0.915143	0.811543	0.926263	584	63.6814	8.79248	0.818827	0.00673086
UV8b_1114	[locus_tag=UV8b_1114] [protein=hypothetical protein] [protein_id=KDB18266.1] [location=complement(877303..877842)] [gbkey=CDS] - [JHTR01000003.1_prot_KDB18266.1_1114]	16.83	5.59	1	1	1	1	1.05054	1.04884	1.19583	0.889498	0.894004	0.924154	179	19.5794	6.31592	0.821696	0.017198
UV8b_4506	[locus_tag=UV8b_4506] [protein=hypothetical protein] [protein_id=KDB14650.1] [location=complement(join(238650..238969,239068..239128))] [gbkey=CDS] - [JHTR01000021.1_prot_KDB14650.1_4506]	21.38	10.32	1	1	2	4	1.10068	1.09493	1.08115	0.89917	0.894737	0.898611	126	14.2304	5.38916	0.821702	5.23179e-06
UV8b_1061	[locus_tag=UV8b_1061] [protein=1,2-a-D-mannosidase] [protein_id=KDB18213.1] [location=complement(join(710967..711523,711589..712185,712294..712475,712567..712775))] [gbkey=CDS] - [JHTR01000003.1_prot_KDB18213.1_1061]	26.3571	7.59	1	3	3	5	1.1218	1.0908	1.06715	0.9159	0.866459	0.918239	514	56.9777	6.03662	0.823416	0.00112824
UV8b_751	[locus_tag=UV8b_751] [protein=Deoxyhypusine synthase] [protein_id=KDB18509.1] [location=join(755161..755370,755499..756278,756339..756404)] [gbkey=CDS] - [JHTR01000002.1_prot_KDB18509.1_751]	65.855	14.25	1	4	4	5	1.12671	1.01812	1.07873	0.869004	0.890526	0.895439	351	38.8506	6.12549	0.823616	0.0042843
UV8b_1474	[locus_tag=UV8b_1474] [protein=putative aimless RasGEF (aleA)] [protein_id=KDB17590.1] [location=complement(join(345377..345466,345548..347004,347178..347381,347448..347645,347760..348066))] [gbkey=CDS] - [JHTR01000005.1_prot_KDB17590.1_1474]	41.04	1.07	1	1	1	1	1.02256	1.08156	1.18978	0.886467	0.90087	0.926979	751	84.6954	7.28369	0.824042	0.0185414
UV8b_77	[locus_tag=UV8b_77] [protein=sarcosine oxidase] [protein_id=KDB18686.1] [location=join(268675..269479,269548..269788,269928..270177,270350..270499)] [gbkey=CDS] - [JHTR01000001.1_prot_KDB18686.1_77]	33.3603	6.03	1	3	3	3	1.09281	1.09983	1.05806	0.913031	0.861558	0.911667	481	53.1167	6.62451	0.826364	0.000906009
UV8b_129	[locus_tag=UV8b_129] [protein=60s ribosomal protein l38] [protein_id=KDB18738.1] [location=join(414966..415164,415235..415835,416061..416334,416417..416450,416630..416758,416896..416930)] [gbkey=CDS] - [JHTR01000001.1_prot_KDB18738.1_129]	125.68	9.69	1	7	7	21	1.02912	1.07143	1.17476	0.842768	0.949181	0.919246	423	46.6568	11.4731	0.827768	0.0247398
UV8b_716	[locus_tag=UV8b_716] [protein=L-threonine 3-dehydrogenase] [protein_id=KDB18474.1] [location=join(642783..642965,643021..643204,643261..643342,643406..643503,643565..643707)] [gbkey=CDS] - [JHTR01000002.1_prot_KDB18474.1_716]	727.832	35.81	1	7	7	31	1.06872	1.07665	1.1278	0.919431	0.894726	0.901887	229	25.0089	7.76709	0.82979	0.000736441
UV8b_5924	[locus_tag=UV8b_5924] [protein=fermentation associated protein] [protein_id=KDB13164.1] [location=join(91523..91669,91708..91929,92058..92248,92334..92583)] [gbkey=CDS] - [JHTR01000034.1_prot_KDB13164.1_5924]	44.4387	10.04	1	2	2	5	1.06874	1.11871	1.09889	0.844399	0.960622	0.92531	269	30.1706	8.54346	0.830812	0.00768823

## Sheet: up
Accession	Description	Score	Coverage	# Proteins	# Unique Peptides	# Peptides	# PSMs	WT-1/ref	WT-2/ref	WT-3/ref	UvEC1-1/ref	UvEC1-2/ref	UvEC1-3/ref	# AAs	MW [kDa]	calc. pI	Ratio(UvEC1/WT)	Pvalue(UvEC1/WT)
UV8b_7224	[locus_tag=UV8b_7224] [protein=Vacuolar protein sorting-associated protein 27] [protein_id=KDB11899.1] [location=join(39363..39436,39502..39634,39714..39998,40120..40893)] [gbkey=CDS] - [JHTR01000056.1_prot_KDB11899.1_7224]	41.7116	11.4	1	4	4	8	0.899431	0.919466	0.934793	1.10021	1.0981	1.11123	421	46.1621	6.84424	1.20186	7.32918e-05
UV8b_4171	[locus_tag=UV8b_4171] [protein=putative O-methyltransferase] [protein_id=KDB15025.1] [location=join(367119..367600,367694..368036)] [gbkey=CDS] - [JHTR01000019.1_prot_KDB15025.1_4171]	94.9523	19.34	1	4	4	8	0.917312	0.919676	0.907127	1.11489	1.09239	1.09459	274	29.8864	7.00537	1.20325	2.16872e-05
UV8b_3220	[locus_tag=UV8b_3220] [protein=cytochrome P450 61] [protein_id=KDB15908.1] [location=complement(join(293851..293889,294034..294317,294430..295400,295495..295645,295827..295995))] [gbkey=CDS] - [JHTR01000013.1_prot_KDB15908.1_3220]	132.876	9.87	1	4	4	5	0.936533	0.928387	0.891488	1.07265	1.13793	1.10829	537	60.6963	7.10791	1.20406	0.00131885
UV8b_5194	[locus_tag=UV8b_5194] [protein=amine oxidase] [protein_id=KDB13860.1] [location=join(106478..106834,106968..107819)] [gbkey=CDS] - [JHTR01000028.1_prot_KDB13860.1_5194]	134.523	13.93	1	4	4	6	0.933205	0.890303	0.90787	1.12017	1.05951	1.11261	402	45.2013	8.71924	1.20536	0.00120261
UV8b_6335	[locus_tag=UV8b_6335] [protein=hypothetical protein] [protein_id=KDB12841.1] [location=complement(join(236959..238513,238565..238669,238741..238951,239003..240137))] [gbkey=CDS] - [JHTR01000039.1_prot_KDB12841.1_6335]	0	1.7	1	1	1	1	0.876344	0.957129	0.904863	1.22596	1.05512	1.02105	1001	112.569	7.47412	1.20589	0.0499483
UV8b_1890	[locus_tag=UV8b_1890] [protein=G-protein alpha subunit] [protein_id=KDB17293.1] [location=complement(join(518213..518465,518509..518789))] [gbkey=CDS] - [JHTR01000007.1_prot_KDB17293.1_1890]	59.2707	11.86	1	1	2	6	0.868471	0.91863	0.975452	1.02557	1.1873	1.12411	177	20.4033	6.39209	1.20793	0.0272478
UV8b_8366	[locus_tag=UV8b_8366] [protein=ubiquitin-conjugating enzyme] [protein_id=KDB10787.1] [location=11630..12328] [gbkey=CDS] - [JHTR01000125.1_prot_KDB10787.1_8366]	162.956	9.05	1	1	1	3	0.895916	0.835319	0.962689	1.07548	1.1254	1.05511	232	25.1391	8.03076	1.20864	0.0114249
UV8b_886	[locus_tag=UV8b_886] [protein=hypothetical protein] [protein_id=KDB18038.1] [location=complement(join(137790..138261,138336..139132))] [gbkey=CDS] - [JHTR01000003.1_prot_KDB18038.1_886]	0	3.32	1	1	1	1	0.937891	0.925315	0.873307	1.13416	1.09485	1.07883	422	46.0672	9.83252	1.20878	0.0017721
UV8b_1093	[locus_tag=UV8b_1093] [protein=hypothetical protein] [protein_id=KDB18245.1] [location=join(824559..824765,824835..824843,824984..825280)] [gbkey=CDS] - [JHTR01000003.1_prot_KDB18245.1_1093]	58.8309	19.41	1	4	4	6	0.871413	0.927651	0.977145	1.06079	1.19261	1.10261	170	18.6731	7.66455	1.20885	0.0174182
UV8b_7070	[locus_tag=UV8b_7070] [protein=glucan 1,3-beta-glucosidase GLUC78 precursor] [protein_id=KDB12077.1] [location=complement(116003..118237)] [gbkey=CDS] - [JHTR01000051.1_prot_KDB12077.1_7070]	67.7315	2.28	1	1	1	3	0.873775	0.942842	0.892196	1.09519	1.0814	1.10159	744	80.3759	6.46826	1.21019	0.00090754
UV8b_6746	[locus_tag=UV8b_6746] [protein=hypothetical protein] [protein_id=KDB12383.1] [location=complement(60358..60714)] [gbkey=CDS] - [JHTR01000045.1_prot_KDB12383.1_6746]	21.57	11.02	1	1	1	4	0.904466	0.927264	0.908639	1.1184	1.09535	1.11226	118	13.3872	9.80322	1.21371	3.7904e-05
UV8b_4383	[locus_tag=UV8b_4383] [protein=CCAAT-binding protein subunit HAP3] [protein_id=KDB14860.1] [location=join(398680..398845,399018..399173,399359..399486,399563..399766)] [gbkey=CDS] - [JHTR01000020.1_prot_KDB14860.1_4383]	36.75	3.69	1	1	1	1	0.911956	0.912689	0.919381	1.06687	1.16347	1.10104	217	23.5767	4.58936	1.21405	0.00231447
UV8b_5118	[locus_tag=UV8b_5118] [protein=Glycylpeptide N-tetradecanoyltransferase] [protein_id=KDB14129.1] [location=complement(join(418010..418402,418518..419094,419171..419730))] [gbkey=CDS] - [JHTR01000026.1_prot_KDB14129.1_5118]	56.5391	4.13	1	1	2	3	0.889327	0.918761	0.930467	1.07846	1.12649	1.1272	509	56.2069	8.07471	1.21675	0.000614215
UV8b_6685	[locus_tag=UV8b_6685] [protein=MFS multidrug transporter] [protein_id=KDB12461.1] [location=complement(116108..117964)] [gbkey=CDS] - [JHTR01000044.1_prot_KDB12461.1_6685]	257.634	8.09	1	4	4	7	0.853533	0.878837	0.958146	1.04711	1.1244	1.1031	618	66.3861	8.29443	1.21709	0.00755901
UV8b_5556	[locus_tag=UV8b_5556] [protein=DNAJ domain containing protein] [protein_id=KDB13458.1] [location=join(9265..9292,9360..9420,9585..10110,10206..10283)] [gbkey=CDS] - [JHTR01000031.1_prot_KDB13458.1_5556]	61.8779	14.35	1	2	2	3	0.884526	0.969838	0.880905	1.08876	1.1163	1.12486	230	24.9924	5.50342	1.2174	0.0030835
UV8b_8105	[locus_tag=UV8b_8105] [protein=hypothetical protein] [protein_id=KDB11041.1] [location=complement(join(42783..43634,43759..44027,44199..44237,44395..45025,46085..46213,46297..46790,46869..46981,47123..47283))] [gbkey=CDS] - [JHTR01000082.1_prot_KDB11041.1_8105]	43.8852	3.8	1	2	2	4	0.838663	0.943475	0.933744	1.15694	1.09596	1.05538	895	98.889	8.29443	1.21812	0.0114423
UV8b_7767	[locus_tag=UV8b_7767] [protein=hypothetical protein] [protein_id=KDB11374.1] [location=join(41694..41724,41818..43019)] [gbkey=CDS] - [JHTR01000072.1_prot_KDB11374.1_7767]	0	6.1	1	2	2	2	0.935614	0.923452	0.850246	1.14692	1.05508	1.09905	410	42.7051	10.3745	1.21841	0.00631795
UV8b_8123	[locus_tag=UV8b_8123] [protein=hypothetical protein] [protein_id=KDB11059.1] [location=join(114324..114388,114505..115462)] [gbkey=CDS] - [JHTR01000082.1_prot_KDB11059.1_8123]	48.6039	9.71	1	4	4	5	0.869157	0.905288	0.971543	1.09774	1.13474	1.11351	340	38.1508	6.65381	1.2185	0.00327932
UV8b_7201	[locus_tag=UV8b_7201] [protein=MFS phospholipid transporter Git1] [protein_id=KDB11972.1] [location=complement(join(146697..147622,147767..147901,148013..148301,148437..148604))] [gbkey=CDS] - [JHTR01000054.1_prot_KDB11972.1_7201]	47.6775	6.53	1	3	3	8	0.856102	0.906858	1.0113	1.09577	1.18469	1.10084	505	55.402	7.21045	1.21881	0.0200293
UV8b_1348	[locus_tag=UV8b_1348] [protein=hypothetical protein] [protein_id=KDB17981.1] [location=complement(673386..674615)] [gbkey=CDS] - [JHTR01000004.1_prot_KDB17981.1_1348]	0	7.33	1	2	2	2	0.95045	0.936447	0.818074	1.15223	1.00178	1.14427	409	43.2535	8.73389	1.21934	0.0373187
UV8b_3257	[locus_tag=UV8b_3257] [protein=putative mitochondrial membrane fission protein (Fis1)] [protein_id=KDB15945.1] [location=complement(434778..435230)] [gbkey=CDS] - [JHTR01000013.1_prot_KDB15945.1_3257]	91.5027	26	1	3	3	5	0.90405	0.947109	0.951441	1.0836	1.16586	1.16857	150	16.657	9.71533	1.21959	0.00294536
UV8b_2316	[locus_tag=UV8b_2316] [protein=hypothetical protein] [protein_id=KDB16725.1] [location=complement(join(240712..241588,241684..241829))] [gbkey=CDS] - [JHTR01000009.1_prot_KDB16725.1_2316]	21.21	4.71	1	2	2	5	0.887461	0.909726	0.949729	1.06096	1.18155	1.11041	340	37.2815	7.78174	1.22061	0.00688719
UV8b_3835	[locus_tag=UV8b_3835] [protein=hypothetical protein] [protein_id=KDB15409.1] [location=complement(435018..435725)] [gbkey=CDS] - [JHTR01000016.1_prot_KDB15409.1_3835]	44.0818	10.21	1	1	1	2	0.884725	0.882869	0.971026	1.07654	1.15041	1.11668	235	23.4106	5.24951	1.22092	0.00502498
UV8b_5596	[locus_tag=UV8b_5596] [protein=RNA polymerase Rpb4 family protein] [protein_id=KDB13498.1] [location=join(117052..117233,117319..117446,117545..117666)] [gbkey=CDS] - [JHTR01000031.1_prot_KDB13498.1_5596]	196.837	10.49	1	1	1	9	0.992703	0.889829	0.867958	1.11262	1.10338	1.14723	143	16.1262	5.23682	1.22277	0.0073989
UV8b_5176	[locus_tag=UV8b_5176] [protein=small nucleolar ribonucleoprotein complex subunit Utp14, putatrive] [protein_id=KDB13842.1] [location=join(58279..58737,58801..60894,61002..61184)] [gbkey=CDS] - [JHTR01000028.1_prot_KDB13842.1_5176]	0	0.55	1	1	1	1	0.908359	0.906201	0.919486	1.04196	1.13991	1.16276	911	99.2671	5.16064	1.22333	0.00547027
UV8b_7455	[locus_tag=UV8b_7455] [protein=ubiquinol-cytochrome c chaperone] [protein_id=KDB11746.1] [location=join(172405..172771,172900..173456)] [gbkey=CDS] - [JHTR01000061.1_prot_KDB11746.1_7455]	81.42	10.75	1	2	2	2	0.899356	0.946726	0.883136	1.08871	1.2286	1.02499	307	34.4544	9.18799	1.22464	0.0316926
UV8b_6937	[locus_tag=UV8b_6937] [protein=hypothetical protein] [protein_id=KDB12233.1] [location=complement(join(183367..183753,184476..184526))] [gbkey=CDS] - [JHTR01000048.1_prot_KDB12233.1_6937]	22.8	13.79	1	1	1	1	0.837998	0.9313	0.977152	1.02	1.20396	1.14041	145	15.71	8.82178	1.22499	0.0383425
UV8b_7088	[locus_tag=UV8b_7088] [protein=NACHT domain protein] [protein_id=KDB12095.1] [location=join(160320..160877,160971..161169,161228..162942,163012..163575)] [gbkey=CDS] - [JHTR01000051.1_prot_KDB12095.1_7088]	1450.13	35.31	1	31	31	109	0.89146	0.906488	0.938028	1.09739	1.15707	1.09808	1011	115.741	6.72705	1.22535	0.00103318
UV8b_3836	[locus_tag=UV8b_3836] [protein=toxin biosynthesis] [protein_id=KDB15410.1] [location=436703..438016] [gbkey=CDS] - [JHTR01000016.1_prot_KDB15410.1_3836]	20.68	6.18	1	2	2	2	0.820624	0.924179	0.996604	1.0671	1.1752	1.11982	437	48.8261	8.93896	1.22642	0.0258813
UV8b_4222	[locus_tag=UV8b_4222] [protein=phosphatidate cytidylyltransferase] [protein_id=KDB15076.1] [location=complement(join(514599..514637,514691..515152,515227..515573,515694..516063,516131..516292))] [gbkey=CDS] - [JHTR01000019.1_prot_KDB15076.1_4222]	80.7606	4.58	1	1	1	2	0.89007	0.907912	0.930425	1.06708	1.16452	1.11489	459	51.8697	9.27588	1.22654	0.00249152
UV8b_6492	[locus_tag=UV8b_6492] [protein=ATP phosphoribosyltransferase] [protein_id=KDB12646.1] [location=complement(join(128306..128676,128871..129404,129523..129557,129725..129741))] [gbkey=CDS] - [JHTR01000041.1_prot_KDB12646.1_6492]	29.4626	7.86	1	3	3	3	0.878582	0.960553	0.848712	1.10609	1.14386	1.04948	318	34.0257	5.59229	1.22754	0.00921001
UV8b_7947	[locus_tag=UV8b_7947] [protein=hypothetical protein] [protein_id=KDB11214.1] [location=join(92023..92131,92313..92596)] [gbkey=CDS] - [JHTR01000077.1_prot_KDB11214.1_7947]	134.326	31.54	1	3	3	10	0.9037	0.881501	0.898949	1.15546	1.05354	1.09039	130	14.2819	7.95752	1.22921	0.00256356
UV8b_456	[locus_tag=UV8b_456] [protein=glutamate decarboxylase] [protein_id=KDB19065.1] [location=complement(1965152..1966675)] [gbkey=CDS] - [JHTR01000001.1_prot_KDB19065.1_456]	181.072	8.09	1	3	4	11	0.932349	0.903299	0.883947	1.10585	1.1473	1.09369	507	56.7563	7.6792	1.23064	0.00062334
UV8b_2116	[locus_tag=UV8b_2116] [protein=histone deacetylase RpdA/Rpd3] [protein_id=KDB17024.1] [location=complement(join(392165..393085,393157..393698,393772..394072,394152..394436,394743..394859))] [gbkey=CDS] - [JHTR01000008.1_prot_KDB17024.1_2116]	76.5125	5.41	1	3	3	5	0.901323	0.921292	0.883711	1.12226	1.10443	1.10433	721	79.1532	4.53857	1.23082	7.33297e-05
UV8b_3221	[locus_tag=UV8b_3221] [protein=mitochondrial pyruvate dehydrogenase kinase] [protein_id=KDB15909.1] [location=join(298411..298593,298742..298782,298933..299001,299106..299159,299796..299924,300099..300587,300884..302102)] [gbkey=CDS] - [JHTR01000013.1_prot_KDB15909.1_3221]	306.666	2.48	1	1	1	5	0.859574	0.92029	0.957557	1.01479	1.22333	1.13289	727	78.5529	8.89502	1.23146	0.034113
UV8b_414	[locus_tag=UV8b_414] [protein=DUF803 domain membrane protein] [protein_id=KDB19023.1] [location=complement(join(1708516..1709002,1709125..1709416,1709489..1709740,1709798..1709882))] [gbkey=CDS] - [JHTR01000001.1_prot_KDB19023.1_414]	27.77	3.23	1	1	1	1	0.929423	0.912176	0.868781	1.12222	1.07817	1.13834	371	39.9473	6.07471	1.23183	0.00119238
UV8b_3053	[locus_tag=UV8b_3053] [protein=vacuolar ATP synthase 16 kda proteolipid subunit] [protein_id=KDB16123.1] [location=complement(423856..424131)] [gbkey=CDS] - [JHTR01000012.1_prot_KDB16123.1_3053]	97.9897	19.78	1	1	1	4	0.918514	0.918419	0.861704	1.12348	1.03366	1.16732	91	9.50882	8.39697	1.23191	0.00878202
UV8b_4717	[locus_tag=UV8b_4717] [protein=annexin XIV] [protein_id=KDB14446.1] [location=join(312510..312543,312629..313683,313746..314033)] [gbkey=CDS] - [JHTR01000023.1_prot_KDB14446.1_4717]	58.1843	8.3	1	4	4	6	0.880214	0.912027	0.927537	1.07263	1.1293	1.14877	458	50.9243	8.29443	1.23197	0.00141452
UV8b_7843	[locus_tag=UV8b_7843] [protein=TOS1 protein] [protein_id=KDB11314.1] [location=join(64158..64400,64465..64958,65063..65684)] [gbkey=CDS] - [JHTR01000074.1_prot_KDB11314.1_7843]	39.8	4.42	1	2	2	3	0.863336	0.879074	0.929815	1.0705	1.09513	1.1288	452	48.1284	7.18115	1.23284	0.00138332
UV8b_2874	[locus_tag=UV8b_2874] [protein=zinc transporter protein] [protein_id=KDB16418.1] [location=569255..570388] [gbkey=CDS] - [JHTR01000011.1_prot_KDB16418.1_2874]	171.879	11.94	1	4	4	13	0.825219	0.955694	0.871394	1.14327	1.03215	1.09963	377	40.4809	6.41748	1.23479	0.014277
UV8b_3371	[locus_tag=UV8b_3371] [protein=glutathione S-transferase II] [protein_id=KDB15731.1] [location=complement(join(295208..295491,295583..295750,295824..295881,296014..296431,296463..296940,297144..297711,297807..297914))] [gbkey=CDS] - [JHTR01000014.1_prot_KDB15731.1_3371]	386.23	10.68	1	6	6	17	0.935023	0.926122	0.846174	1.12577	1.15382	1.06467	693	77.861	7.6792	1.23527	0.00533162
UV8b_4693	[locus_tag=UV8b_4693] [protein=transesterase] [protein_id=KDB14422.1] [location=243195..244427] [gbkey=CDS] - [JHTR01000023.1_prot_KDB14422.1_4693]	490.947	22.44	1	6	6	19	0.86916	0.909396	0.94219	1.04492	1.16065	1.1583	410	44.2677	5.79541	1.23638	0.00797262
UV8b_3195	[locus_tag=UV8b_3195] [protein=DUF221 domain-containing protein] [protein_id=KDB15883.1] [location=join(208252..208618,208717..208837,208980..210120,210200..210680,210778..211622)] [gbkey=CDS] - [JHTR01000013.1_prot_KDB15883.1_3195]	534.597	16.77	1	13	13	38	0.895878	0.907649	0.916001	1.10397	1.16269	1.10576	984	109.792	8.71924	1.24008	0.000416506
UV8b_7084	[locus_tag=UV8b_7084] [protein=peptidase S8 and S53 subtilisin kexin sedolisin] [protein_id=KDB12091.1] [location=complement(join(149965..150273,150366..150658,150718..150789,150881..150992,151052..151284,151374..151527,151593..152232,152360..152406))] [gbkey=CDS] - [JHTR01000051.1_prot_KDB12091.1_7084]	838.525	40.23	1	20	20	53	0.903753	0.900121	0.885245	1.1319	1.12347	1.08112	619	66.1879	8.33838	1.24074	0.000206831
UV8b_5289	[locus_tag=UV8b_5289] [protein=5'-nucleotidase precursor] [protein_id=KDB13955.1] [location=join(378042..378162,378298..379925)] [gbkey=CDS] - [JHTR01000028.1_prot_KDB13955.1_5289]	247.784	21.82	1	9	9	22	0.890701	0.905615	0.90138	1.07063	1.14432	1.13298	582	63.135	6.58057	1.24103	0.000747261
UV8b_1454	[locus_tag=UV8b_1454] [protein=aldose 1-epimerase] [protein_id=KDB17570.1] [location=complement(join(289604..290016,290252..291187,291253..291397,291442..291510))] [gbkey=CDS] - [JHTR01000005.1_prot_KDB17570.1_1454]	130.144	13.65	1	5	5	11	0.870284	0.852888	0.93098	1.01376	1.18481	1.09554	520	56.417	6.63916	1.24112	0.0176221
UV8b_7970	[locus_tag=UV8b_7970] [protein=putative 60S acidic ribosomal protein P0] [protein_id=KDB11159.1] [location=complement(join(20879..20951,21024..21503,21726..21974,22370..22545))] [gbkey=CDS] - [JHTR01000078.1_prot_KDB11159.1_7970]	92.9129	10.15	1	1	1	2	0.958987	0.846849	0.886476	1.14695	1.14749	1.0478	325	35.763	5.73193	1.2414	0.00970504
UV8b_8017	[locus_tag=UV8b_8017] [protein=multidrug resistance protein fnx1] [protein_id=KDB11107.1] [location=complement(22151..23977)] [gbkey=CDS] - [JHTR01000080.1_prot_KDB11107.1_8017]	49.4065	6.09	1	4	4	7	0.853079	0.914391	0.944881	1.06384	1.1603	1.14372	608	65.0051	8.98291	1.24168	0.0055553
UV8b_7083	[locus_tag=UV8b_7083] [protein=peptidase S8 and S53 subtilisin kexin sedolisin] [protein_id=KDB12090.1] [location=complement(join(147700..147872,147932..148706,148768..149022,149099..149371))] [gbkey=CDS] - [JHTR01000051.1_prot_KDB12090.1_7083]	896.951	28.31	1	10	10	42	0.871866	0.905388	0.915735	1.07539	1.15832	1.11123	491	53.0763	6.354	1.24209	0.00137206
UV8b_7009	[locus_tag=UV8b_7009] [protein=FAD dependent oxidoreductase] [protein_id=KDB12185.1] [location=complement(join(165941..167116,167219..167470))] [gbkey=CDS] - [JHTR01000049.1_prot_KDB12185.1_7009]	17.46	3.37	1	2	2	2	0.898947	0.8911	0.889933	1.22297	1.03421	1.07907	475	52.0862	6.21436	1.24488	0.0184986
UV8b_2545	[locus_tag=UV8b_2545] [protein=external NADH-ubiquinone oxidoreductase] [protein_id=KDB16510.1] [location=complement(join(128198..128271,128351..129512))] [gbkey=CDS] - [JHTR01000010.1_prot_KDB16510.1_2545]	117.773	13.63	1	6	6	11	0.885296	0.91634	0.912978	1.10039	1.15696	1.12507	411	45.6676	7.44482	1.246	0.000309907
UV8b_5686	[locus_tag=UV8b_5686] [protein=putative splicing factor 3a subunit 2] [protein_id=KDB13588.1] [location=complement(406992..407726)] [gbkey=CDS] - [JHTR01000031.1_prot_KDB13588.1_5686]	35.0907	6.97	1	2	2	3	0.864908	0.911014	0.95024	1.06403	1.21496	1.11941	244	27.5499	9.49561	1.24659	0.0113667
UV8b_7461	[locus_tag=UV8b_7461] [protein=putative transporter] [protein_id=KDB11675.1] [location=join(2875..3038,3170..4278,4434..4594,4665..4730,4826..5368)] [gbkey=CDS] - [JHTR01000062.1_prot_KDB11675.1_7461]	21.23	2.65	1	1	1	1	0.897886	0.942583	0.847193	1.14629	1.00503	1.20224	680	73.6239	6.37939	1.24776	0.0266846
UV8b_5766	[locus_tag=UV8b_5766] [protein=CCCH zinc finger and SMR domain containing protein] [protein_id=KDB13387.1] [location=complement(join(232888..233075,233369..233399,233466..233964,234064..234816,234913..235847))] [gbkey=CDS] - [JHTR01000032.1_prot_KDB13387.1_5766]	30.36	2.87	1	1	1	1	0.837583	0.952299	0.91909	1.08625	1.18685	1.11188	801	85.6141	7.66455	1.24955	0.00776121
UV8b_6798	[locus_tag=UV8b_6798] [protein=Phosphatidylinositol-specific phospholipase C, X domain containing protein] [protein_id=KDB12311.1] [location=complement(36383..37801)] [gbkey=CDS] - [JHTR01000046.1_prot_KDB12311.1_6798]	176.903	14.19	1	5	5	8	0.843624	0.876948	0.955969	1.01181	1.14687	1.19355	472	52.5983	5.77002	1.25245	0.0243079
UV8b_5850	[locus_tag=UV8b_5850] [protein=lps-induced tumor necrosis factor alpha factor] [protein_id=KDB13260.1] [location=complement(join(129679..130057,130182..130513))] [gbkey=CDS] - [JHTR01000033.1_prot_KDB13260.1_5850]	51.52	11.44	1	2	2	2	0.886373	0.847971	0.955866	1.02592	1.24835	1.10082	236	26.1154	6.43018	1.25458	0.0346547
UV8b_1191	[locus_tag=UV8b_1191] [protein=nuclear fragile X mental retardation-interacting protein 1] [protein_id=KDB17824.1] [location=complement(join(111445..112348,112419..113443))] [gbkey=CDS] - [JHTR01000004.1_prot_KDB17824.1_1191]	33.68	1.87	1	1	1	1	0.925097	0.946642	0.799423	1.15686	1.01332	1.18879	642	68.9168	9.20264	1.25749	0.0317866
UV8b_6141	[locus_tag=UV8b_6141] [protein=glycosyl transferase family protein] [protein_id=KDB12939.1] [location=complement(23190..23750)] [gbkey=CDS] - [JHTR01000037.1_prot_KDB12939.1_6141]	206.259	27.42	1	4	4	8	0.864863	0.899798	0.930762	1.0376	1.24501	1.10695	186	20.215	7.53271	1.25752	0.0222953
UV8b_5282	[locus_tag=UV8b_5282] [protein=cytochrome P450] [protein_id=KDB13948.1] [location=355291..356658] [gbkey=CDS] - [JHTR01000028.1_prot_KDB13948.1_5282]	0	3.3	1	1	1	1	0.909738	0.878135	0.906673	1.07938	1.20307	1.10785	455	50.2301	6.96143	1.25821	0.00391048
UV8b_3977	[locus_tag=UV8b_3977] [protein=lysine decarboxylase-like protein] [protein_id=KDB15137.1] [location=complement(join(277787..278328,278419..278593))] [gbkey=CDS] - [JHTR01000018.1_prot_KDB15137.1_3977]	108.744	10.92	1	1	1	2	0.854338	0.902686	0.936008	1.08289	1.1915	1.12598	238	25.4145	6.11279	1.26265	0.00395087
UV8b_618	[locus_tag=UV8b_618] [protein=cytochrome b561] [protein_id=KDB18376.1] [location=join(353667..353814,353885..354486)] [gbkey=CDS] - [JHTR01000002.1_prot_KDB18376.1_618]	22.29	10.04	1	1	1	1	0.892589	0.931698	0.848837	1.16703	1.06829	1.14122	249	27.1375	9.59814	1.26314	0.00351578
UV8b_7693	[locus_tag=UV8b_7693] [protein=putative GPI anchored protein] [protein_id=KDB11470.1] [location=complement(join(126064..126375,126488..126877))] [gbkey=CDS] - [JHTR01000068.1_prot_KDB11470.1_7693]	59.0762	17.17	1	2	2	3	0.874376	0.90813	0.920155	1.11072	1.14807	1.15715	233	24.0768	5.8208	1.26392	0.000272375
UV8b_3145	[locus_tag=UV8b_3145] [protein=DUF895 domain protein] [protein_id=KDB16215.1] [location=join(700333..700440,700512..700724)] [gbkey=CDS] - [JHTR01000012.1_prot_KDB16215.1_3145]	57.47	36.79	1	3	3	5	0.885528	0.897707	0.901407	1.08998	1.19767	1.11768	106	11.842	6.04932	1.26845	0.00181596
UV8b_7868	[locus_tag=UV8b_7868] [protein=urea active transporter] [protein_id=KDB11258.1] [location=join(29728..31472,31642..31948)] [gbkey=CDS] - [JHTR01000075.1_prot_KDB11258.1_7868]	235.371	9.08	1	4	4	13	0.862793	0.900581	0.889855	1.08297	1.17037	1.11234	683	72.914	8.63135	1.26852	0.00106407
UV8b_3790	[locus_tag=UV8b_3790] [protein=hypothetical protein] [protein_id=KDB15364.1] [location=complement(join(296086..296785,297033..297112))] [gbkey=CDS] - [JHTR01000016.1_prot_KDB15364.1_3790]	0	5.02	1	2	2	2	0.842517	0.921456	0.917902	0.996048	1.1451	1.26099	259	23.2135	5.46533	1.26856	0.0412176
UV8b_184	[locus_tag=UV8b_184] [protein=hypothetical protein] [protein_id=KDB18793.1] [location=join(601902..603170,603277..605025)] [gbkey=CDS] - [JHTR01000001.1_prot_KDB18793.1_184]	41.3	3.08	1	2	2	2	0.949552	0.874175	0.835582	1.15173	1.09033	1.13402	1005	109.972	9.1001	1.26953	0.00330562
UV8b_3275	[locus_tag=UV8b_3275] [protein=nmt1 protein] [protein_id=KDB15963.1] [location=complement(join(481871..482692,482856..482885,482963..483065,483147..483181))] [gbkey=CDS] - [JHTR01000013.1_prot_KDB15963.1_3275]	276.255	19.45	1	5	5	15	0.873273	0.895141	0.904296	1.11386	1.17253	1.10796	329	36.9785	5.97314	1.27	0.000438999
UV8b_5494	[locus_tag=UV8b_5494] [protein=putative delta(24(24(1)))-sterol reductase] [protein_id=KDB13662.1] [location=complement(join(209927..210134,210196..210606,210690..211567))] [gbkey=CDS] - [JHTR01000030.1_prot_KDB13662.1_5494]	0	1.41	1	1	1	1	0.795985	0.887185	1.01181	1.03418	1.24815	1.15889	498	57.0632	8.11865	1.2769	0.0476763
UV8b_5629	[locus_tag=UV8b_5629] [protein=exo-beta-1,3-glucanase] [protein_id=KDB13531.1] [location=complement(join(214490..216012,216220..216394))] [gbkey=CDS] - [JHTR01000031.1_prot_KDB13531.1_5629]	281.514	9.73	1	5	5	9	0.898394	0.904154	0.819975	1.12491	1.13268	1.09884	565	58.3404	7.48877	1.27985	0.00108366
UV8b_4827	[locus_tag=UV8b_4827] [protein=putative negative regulator of DNA transposition (Rtt106)] [protein_id=KDB14232.1] [location=complement(join(119287..120527,120646..121042))] [gbkey=CDS] - [JHTR01000024.1_prot_KDB14232.1_4827]	56.77	3.85	1	1	1	1	0.924888	0.873189	0.856725	1.17089	1.11363	1.11441	545	58.7681	4.79248	1.28029	0.000890401
UV8b_6705	[locus_tag=UV8b_6705] [protein=putative polyketide synthase] [protein_id=KDB12481.1] [location=join(189601..190524,190642..190667,190733..190798,190885..191078,191187..191742,191892..197019,197096..197272,197386..198024)] [gbkey=CDS] - [JHTR01000044.1_prot_KDB12481.1_6705]	1384.31	19.23	1	37	37	82	0.891682	0.894767	0.862703	1.12845	1.13826	1.12507	2569	277.877	6.32861	1.28033	2.26933e-05
UV8b_816	[locus_tag=UV8b_816] [protein=ABC transporter ABCl1] [protein_id=KDB18574.1] [location=complement(join(970832..973699,973846..974885,975175..975874))] [gbkey=CDS] - [JHTR01000002.1_prot_KDB18574.1_816]	25.86	1.04	1	1	2	2	0.908764	0.913497	0.83297	1.12479	1.12434	1.15664	1535	170.704	6.68311	1.28267	0.000891088
UV8b_1418	[locus_tag=UV8b_1418] [protein=manganese superoxide dismutase] [protein_id=KDB17534.1] [location=join(161887..162010,162125..162390,162478..162777)] [gbkey=CDS] - [JHTR01000005.1_prot_KDB17534.1_1418]	252.254	7.42	1	1	1	12	0.89831	0.873203	0.878747	1.1253	1.13709	1.13936	229	25.0328	7.26904	1.28356	8.95669e-06
UV8b_2674	[locus_tag=UV8b_2674] [protein=putative glycosyltransferase family 2 protein] [protein_id=KDB16639.1] [location=join(639799..639969,640030..640461,640575..641552,641621..641837,642041..642939)] [gbkey=CDS] - [JHTR01000010.1_prot_KDB16639.1_2674]	95.577	9.24	1	5	5	6	0.866421	0.881704	0.90014	1.08471	1.18658	1.13213	898	100.117	6.55127	1.28515	0.00125151
UV8b_6686	[locus_tag=UV8b_6686] [protein=hypothetical protein] [protein_id=KDB12462.1] [location=join(119999..120328,120399..121946)] [gbkey=CDS] - [JHTR01000044.1_prot_KDB12462.1_6686]	130.559	16.32	1	6	6	8	0.868358	0.884686	0.916084	1.11122	1.2042	1.11586	625	71.1352	5.03369	1.28554	0.00159143
UV8b_8133	[locus_tag=UV8b_8133] [protein=3-hydroxyisobutyrate dehydrogenase] [protein_id=KDB11005.1] [location=join(28616..29044,29116..29136,29198..29260,29344..29754,29844..31628)] [gbkey=CDS] - [JHTR01000083.1_prot_KDB11005.1_8133]	154.491	10.86	1	6	6	8	0.839151	0.87135	0.953411	1.08025	1.21096	1.13568	902	100.213	8.17725	1.28641	0.00751318
UV8b_1840	[locus_tag=UV8b_1840] [protein=hypothetical protein] [protein_id=KDB17243.1] [location=complement(join(326573..327261,327386..327518))] [gbkey=CDS] - [JHTR01000007.1_prot_KDB17243.1_1840]	115.933	16.12	1	3	3	4	0.8529	0.919493	0.900728	1.08233	1.22105	1.14024	273	30.8539	8.33838	1.28824	0.00460142
UV8b_1756	[locus_tag=UV8b_1756] [protein=putative 2-dehydropantoate 2-reductase] [protein_id=KDB17159.1] [location=complement(join(30054..31716,31784..32216,32325..32365,32446..32566,32894..32930))] [gbkey=CDS] - [JHTR01000007.1_prot_KDB17159.1_1756]	81.0161	6.02	1	3	3	3	0.868322	0.845159	0.881522	1.10389	1.17662	1.06638	764	82.8542	8.48486	1.28974	0.0018174
UV8b_1441	[locus_tag=UV8b_1441] [protein=N-acetylglucosamine-6-phosphate deacetylase] [protein_id=KDB17557.1] [location=join(248409..248798,248855..249591,249761..250073)] [gbkey=CDS] - [JHTR01000005.1_prot_KDB17557.1_1441]	62.87	1.88	1	1	1	1	0.882086	0.88013	0.888881	1.15725	1.16067	1.10669	479	51.8442	6.11279	1.29177	0.00012775
UV8b_1542	[locus_tag=UV8b_1542] [protein=Protein kinase domain containing protein] [protein_id=KDB17658.1] [location=join(578367..578433,578587..580946)] [gbkey=CDS] - [JHTR01000005.1_prot_KDB17658.1_1542]	60.3582	5.2	1	3	3	4	0.805247	0.955122	0.912638	1.04794	1.20431	1.20596	808	87.4928	9.70068	1.29375	0.0190425
UV8b_8076	[locus_tag=UV8b_8076] [protein=cytochrome P450] [protein_id=KDB11088.1] [location=complement(join(78400..79462,79589..80106))] [gbkey=CDS] - [JHTR01000081.1_prot_KDB11088.1_8076]	177.58	8.37	1	4	4	7	0.890625	0.889817	0.869902	1.16595	1.16704	1.09703	526	58.3533	9.1001	1.29418	0.000421346
UV8b_5970	[locus_tag=UV8b_5970] [protein=oxalate decarboxylase oxdC] [protein_id=KDB13210.1] [location=complement(join(260242..260930,261042..261381,261548..261919))] [gbkey=CDS] - [JHTR01000034.1_prot_KDB13210.1_5970]	63.0133	11.16	1	4	4	5	0.863855	0.916368	0.869288	1.19035	1.11444	1.1278	466	52.6293	6.06201	1.29556	0.000813561
UV8b_7087	[locus_tag=UV8b_7087] [protein=hypothetical protein] [protein_id=KDB12094.1] [location=join(158136..158367,158437..158796,158878..158975)] [gbkey=CDS] - [JHTR01000051.1_prot_KDB12094.1_7087]	284.581	27.07	1	5	5	13	0.871481	0.86708	0.895558	1.09287	1.19755	1.13559	229	25.1279	9.49561	1.30063	0.00113002
UV8b_2229	[locus_tag=UV8b_2229] [protein=U3 small nucleolar RNA associated protein] [protein_id=KDB17137.1] [location=791523..792863] [gbkey=CDS] - [JHTR01000008.1_prot_KDB17137.1_2229]	0	4.93	1	1	1	1	0.883795	0.91573	0.84269	1.10078	1.25252	1.09406	446	50.8172	9.77393	1.30473	0.00863513
UV8b_6749	[locus_tag=UV8b_6749] [protein=hypothetical protein] [protein_id=KDB12386.1] [location=complement(66274..66588)] [gbkey=CDS] - [JHTR01000045.1_prot_KDB12386.1_6749]	36.63	8.65	1	1	1	2	0.900769	0.88947	0.838796	1.14041	1.14686	1.14383	104	11.6463	11.0776	1.30508	0.00015256
UV8b_1818	[locus_tag=UV8b_1818] [protein=hypothetical protein] [protein_id=KDB17221.1] [location=join(255677..255756,255867..255942,256042..256507,256576..256607,256676..256749,256866..256936,257012..257112)] [gbkey=CDS] - [JHTR01000007.1_prot_KDB17221.1_1818]	28.52	3.01	1	1	1	1	0.855431	0.843379	0.952634	1.06498	1.23062	1.16837	299	33.3316	9.94971	1.30645	0.0103477
UV8b_637	[locus_tag=UV8b_637] [protein=perilipin-like protein] [protein_id=KDB18395.1] [location=join(432018..432077,432234..432725)] [gbkey=CDS] - [JHTR01000002.1_prot_KDB18395.1_637]	359.758	41.53	1	9	9	54	0.858112	0.869289	0.88623	1.09844	1.19125	1.12645	183	20.1896	8.98291	1.30705	0.000734841
UV8b_7184	[locus_tag=UV8b_7184] [protein=putative acetyl xylanesterase] [protein_id=KDB11955.1] [location=join(94641..95079,95159..95238,95386..95774,95835..95877)] [gbkey=CDS] - [JHTR01000054.1_prot_KDB11955.1_7184]	114.832	9.49	1	3	3	8	0.868767	0.858863	0.891697	1.09682	1.24998	1.0915	316	32.5383	6.06201	1.31267	0.00667995
UV8b_8306	[locus_tag=UV8b_8306] [protein=biotin protein ligase] [protein_id=KDB10862.1] [location=join(51297..51522,51889..52323,52498..52678,52931..53252)] [gbkey=CDS] - [JHTR01000103.1_prot_KDB10862.1_8306]	251.834	13.7	7	3	4	9	0.879431	0.873261	0.878663	1.11716	1.22788	1.11242	387	41.7512	9.31982	1.31394	0.00188156
UV8b_1780	[locus_tag=UV8b_1780] [protein=oligopeptide transporter OPT-like protein] [protein_id=KDB17183.1] [location=complement(join(110982..111420,111570..112904,113003..113197,113260..113417,113509..113829))] [gbkey=CDS] - [JHTR01000007.1_prot_KDB17183.1_1780]	75.4525	6.01	1	5	5	8	0.905353	0.877039	0.819946	1.13446	1.12323	1.16505	815	91.2303	7.6499	1.31526	0.000620264
UV8b_3132	[locus_tag=UV8b_3132] [protein=L-Rhamnonate Dehydratase] [protein_id=KDB16202.1] [location=complement(join(665142..666154,666273..666421,666496..666529,666609..666681))] [gbkey=CDS] - [JHTR01000012.1_prot_KDB16202.1_3132]	563.803	17.3	1	7	7	25	0.857317	0.867892	0.905539	1.10516	1.2345	1.13187	422	46.6275	5.92236	1.3196	0.00263306
UV8b_1439	[locus_tag=UV8b_1439] [protein=hypothetical protein] [protein_id=KDB17555.1] [location=complement(240947..241837)] [gbkey=CDS] - [JHTR01000005.1_prot_KDB17555.1_1439]	36.8	5.07	1	1	1	1	0.867561	0.913377	0.825403	1.21921	1.05478	1.17046	296	32.5557	5.49072	1.32157	0.00707382
UV8b_2399	[locus_tag=UV8b_2399] [protein=putative Snf1 kinase complex beta-subunit Gal83] [protein_id=KDB16808.1] [location=534982..535788] [gbkey=CDS] - [JHTR01000009.1_prot_KDB16808.1_2399]	27.44	6.34	1	1	1	1	0.920352	0.877863	0.800291	1.22657	1.05395	1.15818	268	28.2202	6.97607	1.32334	0.0102539
UV8b_7123	[locus_tag=UV8b_7123] [protein=V8-like Glu-specific endopeptidase] [protein_id=KDB12037.1] [location=complement(join(105165..105221,105984..106757))] [gbkey=CDS] - [JHTR01000052.1_prot_KDB12037.1_7123]	124.987	9.42	1	3	3	7	0.864547	0.883928	0.865106	1.13567	1.18426	1.14259	276	29.8508	8.32373	1.32482	6.70909e-05
UV8b_1155	[locus_tag=UV8b_1155] [protein=acetoacetyl-CoA synthase] [protein_id=KDB17788.1] [location=complement(join(10582..11352,11532..12269,12352..12822,12973..13083))] [gbkey=CDS] - [JHTR01000004.1_prot_KDB17788.1_1155]	66.5657	9.77	1	7	7	11	0.872327	0.868374	0.878092	1.15424	1.16671	1.15416	696	76.9966	7.54736	1.32699	5.80359e-07
UV8b_6257	[locus_tag=UV8b_6257] [protein=hypothetical protein] [protein_id=KDB12896.1] [location=join(90633..91029,91124..91647)] [gbkey=CDS] - [JHTR01000038.1_prot_KDB12896.1_6257]	54.9371	17.32	1	3	3	5	0.860533	0.893803	0.848867	1.17387	1.08005	1.20063	306	32.6791	7.98682	1.32704	0.00188789
UV8b_2076	[locus_tag=UV8b_2076] [protein=putative lysosomal cobalamin transporter] [protein_id=KDB16984.1] [location=275325..277115] [gbkey=CDS] - [JHTR01000008.1_prot_KDB16984.1_2076]	0	3.19	1	1	1	1	0.857008	0.864523	0.882002	1.12653	1.19811	1.16831	596	66.1682	8.57275	1.34162	0.000176703
UV8b_4961	[locus_tag=UV8b_4961] [protein=putative sodium/phosphate symporter] [protein_id=KDB14171.1] [location=complement(join(356481..356764,356916..358376,358450..358531))] [gbkey=CDS] - [JHTR01000025.1_prot_KDB14171.1_4961]	71.1727	6.25	1	3	3	4	0.978114	0.84412	0.711433	1.1114	1.14069	1.1588	608	64.8683	9.29053	1.34623	0.0201455
UV8b_4101	[locus_tag=UV8b_4101] [protein=cell surface protein] [protein_id=KDB14955.1] [location=complement(145229..146428)] [gbkey=CDS] - [JHTR01000019.1_prot_KDB14955.1_4101]	0	2.26	1	1	1	1	0.788713	0.855707	0.960468	1.13235	1.18828	1.1943	399	40.1108	7.34229	1.34936	0.0048472
UV8b_6011	[locus_tag=UV8b_6011] [protein=polyketide synthase] [protein_id=KDB13140.1] [location=join(331829..332038,332093..332179,332241..332298,332370..332703,332751..338460,338577..339419)] [gbkey=CDS] - [JHTR01000035.1_prot_KDB13140.1_6011]	123.959	6.09	1	12	12	21	0.854638	0.847652	0.894474	1.12039	1.18709	1.19763	2413	261.199	6.15088	1.3498	0.00042875
UV8b_6984	[locus_tag=UV8b_6984] [protein=Amino-acid permease inda1] [protein_id=KDB12160.1] [location=join(81510..81800,81908..81965,82076..83196,83288..83548)] [gbkey=CDS] - [JHTR01000049.1_prot_KDB12160.1_6984]	207.704	14.93	1	8	8	15	0.840619	0.857316	0.857009	1.14082	1.14735	1.16908	576	62.9947	8.92432	1.35316	7.78054e-06
UV8b_1197	[locus_tag=UV8b_1197] [protein=4-coumarate-CoA ligase 2] [protein_id=KDB17830.1] [location=complement(join(123738..124072,124170..124344,124486..124905,124997..125140,125219..125691,125793..125892))] [gbkey=CDS] - [JHTR01000004.1_prot_KDB17830.1_1197]	77.47	10.04	1	4	4	4	0.861406	0.861135	0.836344	1.14982	1.11713	1.20287	548	61.329	7.82568	1.35599	0.000322701
UV8b_4611	[locus_tag=UV8b_4611] [protein=ABC multidrug transporter Mdr1] [protein_id=KDB14561.1] [location=join(504474..506250,506321..508554)] [gbkey=CDS] - [JHTR01000022.1_prot_KDB14561.1_4611]	690.094	11.98	2	12	13	31	0.85061	0.857799	0.861349	1.10398	1.19589	1.19356	1336	145.877	6.84424	1.35944	0.000536296
UV8b_3526	[locus_tag=UV8b_3526] [protein=putative DNA repair protein Rad1] [protein_id=KDB15495.1] [location=complement(join(107127..107950,108033..108189))] [gbkey=CDS] - [JHTR01000015.1_prot_KDB15495.1_3526]	0	3.37	1	1	1	1	0.873121	0.889779	0.80834	1.17525	1.11362	1.20715	326	35.8909	4.85596	1.35966	0.0011366
UV8b_5326	[locus_tag=UV8b_5326] [protein=Superoxide dismutase] [protein_id=KDB13992.1] [location=join(504932..504976,505057..505518,505701..505823)] [gbkey=CDS] - [JHTR01000028.1_prot_KDB13992.1_5326]	30.1	6.7	1	2	2	3	0.854909	0.863507	0.852015	1.13534	1.22707	1.13919	209	22.7356	7.21045	1.36226	0.000502293
UV8b_7406	[locus_tag=UV8b_7406] [protein=VPS9 domain protein] [protein_id=KDB11697.1] [location=join(4117..4319,4383..6093,6230..6421)] [gbkey=CDS] - [JHTR01000061.1_prot_KDB11697.1_7406]	17.31	2.14	1	1	2	4	0.920636	0.882525	0.745668	1.19513	1.0603	1.2373	701	74.6178	5.96045	1.37033	0.0139415
UV8b_4541	[locus_tag=UV8b_4541] [protein=hypothetical protein] [protein_id=KDB14685.1] [location=complement(join(451917..452343,452463..453037,453387..453791))] [gbkey=CDS] - [JHTR01000021.1_prot_KDB14685.1_4541]	93.0247	8.97	1	3	3	5	0.836464	0.923652	0.822546	1.17852	1.22571	1.15545	468	50.5687	8.71924	1.3783	0.000997144
UV8b_5442	[locus_tag=UV8b_5442] [protein=3-phytase A] [protein_id=KDB13610.1] [location=join(59143..59322,59409..60174,60236..60918)] [gbkey=CDS] - [JHTR01000030.1_prot_KDB13610.1_5442]	62.9633	7.2	1	3	3	4	0.926656	0.869651	0.752831	1.21872	1.13084	1.17555	542	59.6818	5.14795	1.38286	0.00469054
UV8b_5173	[locus_tag=UV8b_5173] [protein=carboxyl-terminal proteinase] [protein_id=KDB13839.1] [location=join(50049..50303,50378..51421)] [gbkey=CDS] - [JHTR01000028.1_prot_KDB13839.1_5173]	336.41	15.28	1	5	5	17	0.867974	0.810844	0.813039	1.06076	1.21506	1.1965	432	45.9701	7.59131	1.39347	0.00329708
UV8b_236	[locus_tag=UV8b_236] [protein=putative MFS multidrug transporter] [protein_id=KDB18845.1] [location=join(740729..742121,742200..742513)] [gbkey=CDS] - [JHTR01000001.1_prot_KDB18845.1_236]	190.505	2.99	1	1	1	4	0.90749	0.856248	0.73783	1.23444	1.11529	1.16526	568	60.5199	7.47412	1.40512	0.00518871
UV8b_4882	[locus_tag=UV8b_4882] [protein=methyltransferase type 11] [protein_id=KDB14287.1] [location=330174..331040] [gbkey=CDS] - [JHTR01000024.1_prot_KDB14287.1_4882]	233.607	32.99	1	8	8	20	0.833824	0.836238	0.845783	1.19348	1.15445	1.18767	288	30.887	6.07471	1.40533	1.15685e-05
UV8b_5730	[locus_tag=UV8b_5730] [protein=putative U1 small nuclear ribonucleoprotein C] [protein_id=KDB13351.1] [location=complement(join(109890..110140,110266..110403,110475..110576,110643..110648,110702..110711))] [gbkey=CDS] - [JHTR01000032.1_prot_KDB13351.1_5730]	27.17	7.74	1	1	1	1	0.767742	0.815868	0.974512	1.01002	1.34213	1.26289	168	17.2975	7.54736	1.41316	0.0405428
UV8b_444	[locus_tag=UV8b_444] [protein=lipase 3 precursor] [protein_id=KDB19053.1] [location=1921234..1922964] [gbkey=CDS] - [JHTR01000001.1_prot_KDB19053.1_444]	65.8411	3.3	1	2	2	7	0.837552	0.832793	0.82002	1.17807	1.18308	1.17899	576	62.6046	8.35303	1.42154	3.53892e-07
UV8b_1085	[locus_tag=UV8b_1085] [protein=purine transporter] [protein_id=KDB18237.1] [location=join(782703..782905,782964..782989,783078..783107,783175..784508)] [gbkey=CDS] - [JHTR01000003.1_prot_KDB18237.1_1085]	57.32	5.09	1	1	1	1	0.820794	0.855475	0.852896	1.04013	1.3036	1.26447	530	56.7259	5.57959	1.42664	0.0122343
UV8b_1063	[locus_tag=UV8b_1063] [protein=high-affinity nicotinic acid transporter] [protein_id=KDB18215.1] [location=join(719746..719883,719945..720002,720058..720344,720429..720824,720899..721083,721179..721350,721433..721625,721934..721962)] [gbkey=CDS] - [JHTR01000003.1_prot_KDB18215.1_1063]	0	1.24	1	1	1	1	0.764562	0.793311	0.952651	1.14533	1.30772	1.18799	485	53.1435	8.07471	1.45031	0.00773479
UV8b_457	[locus_tag=UV8b_457] [protein=glutamate decarboxylase] [protein_id=KDB19066.1] [location=complement(1966856..1967143)] [gbkey=CDS] - [JHTR01000001.1_prot_KDB19066.1_457]	35.7779	13.68	1	1	1	3	0.829056	0.840738	0.821832	1.16848	1.2445	1.23431	95	10.3681	5.17334	1.46382	9.48601e-05
UV8b_7100	[locus_tag=UV8b_7100] [protein=putative carboxyphosphonoenolpyruvate phosphonomutase] [protein_id=KDB12107.1] [location=complement(join(196285..196907,197045..197192,197304..197561))] [gbkey=CDS] - [JHTR01000051.1_prot_KDB12107.1_7100]	386.492	12.57	1	4	4	12	0.856183	0.816986	0.784618	1.204	1.24219	1.16333	342	36.6537	6.06201	1.4686	0.00023717
UV8b_372	[locus_tag=UV8b_372] [protein=glycine-rich cell wall structural protein 1] [protein_id=KDB18981.1] [location=join(1581333..1581447,1581542..1582024,1582180..1582331)] [gbkey=CDS] - [JHTR01000001.1_prot_KDB18981.1_372]	91.1617	21.29	1	4	5	7	0.768399	0.793146	0.90994	1.06961	1.42715	1.13736	249	25.6643	5.07178	1.47042	0.0303908
UV8b_7457	[locus_tag=UV8b_7457] [protein=Dihydrofolate reductase] [protein_id=KDB11748.1] [location=complement(join(175031..175091,175195..175266,175421..175895,176014..176054,176221..176299,176401..176437))] [gbkey=CDS] - [JHTR01000061.1_prot_KDB11748.1_7457]	0	11.42	1	1	1	1	0.722768	0.97175	0.760381	1.27651	1.07803	1.2738	254	28.4827	8.55811	1.478	0.0183051
UV8b_8313	[locus_tag=UV8b_8313] [protein=magnesium-translocating P-type ATPase family protein] [protein_id=KDB10842.1] [location=complement(join(13741..14014,14164..14311,14373..14490,14557..14628,14696..15715,15817..16032,16093..16214,16285..16735,16800..17090))] [gbkey=CDS] - [JHTR01000104.1_prot_KDB10842.1_8313]	186.761	9.3	1	6	6	8	0.852204	0.820009	0.77521	1.26138	1.13733	1.24075	903	98.2634	5.94775	1.48706	0.000862137
UV8b_7624	[locus_tag=UV8b_7624] [protein=glucose transporter] [protein_id=KDB11479.1] [location=join(12421..12722,12832..13418,13536..14320)] [gbkey=CDS] - [JHTR01000067.1_prot_KDB11479.1_7624]	77.9741	6.1	1	3	3	4	0.815213	0.828193	0.806912	1.18892	1.25174	1.20613	557	61.4241	7.84033	1.4883	3.54183e-05
UV8b_1796	[locus_tag=UV8b_1796] [protein=MADS box protein] [protein_id=KDB17199.1] [location=complement(join(183085..183372,183558..183692,183925..184176))] [gbkey=CDS] - [JHTR01000007.1_prot_KDB17199.1_1796]	79.41	7.14	1	1	1	2	0.792473	0.817205	0.843787	1.20624	1.24247	1.21254	224	24.1927	5.8208	1.49228	2.67156e-05
UV8b_6649	[locus_tag=UV8b_6649] [protein=MFS transporter] [protein_id=KDB12524.1] [location=complement(join(183765..184415,184504..185316,185383..185610))] [gbkey=CDS] - [JHTR01000043.1_prot_KDB12524.1_6649]	78.375	3.02	1	1	1	2	0.749396	0.798313	0.904373	1.16023	1.34252	1.20131	563	59.9204	8.41162	1.51058	0.00433723
UV8b_1132	[locus_tag=UV8b_1132] [protein=putative fatty acid oxygenase] [protein_id=KDB18284.1] [location=complement(join(928827..929363,929443..931514,931586..931778,931831..932069,932141..932519))] [gbkey=CDS] - [JHTR01000003.1_prot_KDB18284.1_1132]	643.404	27.74	1	26	26	55	0.818602	0.81096	0.767804	1.21807	1.20833	1.22386	1139	126.009	7.84033	1.52262	1.42945e-05
UV8b_4944	[locus_tag=UV8b_4944] [protein=hypothetical protein] [protein_id=KDB14349.1] [location=join(519254..519266,519377..519577,519680..519799,519913..520064)] [gbkey=CDS] - [JHTR01000024.1_prot_KDB14349.1_4944]	114.188	15.53	1	2	2	7	0.857678	0.839064	0.701669	1.30932	1.11342	1.23695	161	16.4513	8.41162	1.52588	0.00507999
UV8b_75	[locus_tag=UV8b_75] [protein=Rieske [2Fe-2S] domain protein] [protein_id=KDB18684.1] [location=complement(266625..266990)] [gbkey=CDS] - [JHTR01000001.1_prot_KDB18684.1_75]	79.0393	14.05	1	2	2	4	0.818355	0.778053	0.827978	1.1261	1.31127	1.26587	121	13.9958	6.52197	1.5275	0.00179889
UV8b_5653	[locus_tag=UV8b_5653] [protein=hypothetical protein] [protein_id=KDB13555.1] [location=complement(join(300854..301107,301283..301421))] [gbkey=CDS] - [JHTR01000031.1_prot_KDB13555.1_5653]	661.672	59.23	1	8	8	26	0.789444	0.805449	0.817993	1.13023	1.3312	1.22672	130	13.4167	6.80029	1.52852	0.00191951
UV8b_7690	[locus_tag=UV8b_7690] [protein=heat shock protein 30] [protein_id=KDB11467.1] [location=complement(107347..107982)] [gbkey=CDS] - [JHTR01000068.1_prot_KDB11467.1_7690]	877.912	68.72	1	16	16	49	0.759158	0.783407	0.846342	1.09889	1.32015	1.25661	211	23.2635	5.69385	1.53863	0.00373166
UV8b_5917	[locus_tag=UV8b_5917] [protein=cystein rich protein] [protein_id=KDB13157.1] [location=complement(join(64562..64776,65112..65633,65792..66302))] [gbkey=CDS] - [JHTR01000034.1_prot_KDB13157.1_5917]	1133.49	30.12	1	11	11	52	0.815335	0.80975	0.76246	1.3078	1.14605	1.22786	415	44.9747	7.44482	1.54205	0.000963126
UV8b_2673	[locus_tag=UV8b_2673] [protein=putative secreted glucosidase] [protein_id=KDB16638.1] [location=complement(join(606613..606784,606876..607212,607320..607451,607611..608022,608270..608617))] [gbkey=CDS] - [JHTR01000010.1_prot_KDB16638.1_2673]	0	4.72	1	2	2	2	0.781458	0.828455	0.772676	1.21765	1.24707	1.26359	466	52.5949	8.104	1.56481	3.36502e-05
UV8b_76	[locus_tag=UV8b_76] [protein=Rieske [2Fe-2S] domain protein] [protein_id=KDB18685.1] [location=complement(267139..267972)] [gbkey=CDS] - [JHTR01000001.1_prot_KDB18685.1_76]	23.75	2.53	1	1	1	1	0.739197	0.746329	0.917989	1.12064	1.37438	1.28157	277	31.7404	6.59521	1.57128	0.00834684
UV8b_2086	[locus_tag=UV8b_2086] [protein=polyketide synthetase PksP] [protein_id=KDB16994.1] [location=complement(join(309454..310295,310453..315632,315722..316408,316848..317494,317555..317635))] [gbkey=CDS] - [JHTR01000008.1_prot_KDB16994.1_2086]	366.473	10.73	1	22	22	37	0.786632	0.792863	0.804479	1.26411	1.25312	1.29608	2478	267.17	6.80029	1.59956	4.33159e-06
UV8b_2091	[locus_tag=UV8b_2091] [protein=laccase] [protein_id=KDB16999.1] [location=join(330408..330613,330685..330714,331030..331200,331271..331399,331560..332802)] [gbkey=CDS] - [JHTR01000008.1_prot_KDB16999.1_2091]	48.9532	9.29	1	4	4	7	0.809342	0.810584	0.763697	1.3105	1.29025	1.24776	592	65.7012	5.38916	1.61456	3.48953e-05
UV8b_6671	[locus_tag=UV8b_6671] [protein=Cel5b putative endoglucanase] [protein_id=KDB12447.1] [location=complement(join(74399..74779,74848..75458,75539..75653,75724..75765,75831..75899))] [gbkey=CDS] - [JHTR01000044.1_prot_KDB12447.1_6671]	61.79	3.7	1	1	1	1	0.822046	0.780694	0.719299	1.26841	1.24396	1.26905	405	42.9809	5.50342	1.62849	9.59506e-05
UV8b_7687	[locus_tag=UV8b_7687] [protein=class v chitinase] [protein_id=KDB11464.1] [location=join(91922..92189,92250..92407,92472..92635,92694..94746,94826..95455)] [gbkey=CDS] - [JHTR01000068.1_prot_KDB11464.1_7687]	184.242	8.35	1	8	8	17	0.785693	0.791004	0.761875	1.25439	1.32917	1.29747	1090	118.319	7.07861	1.65957	2.55948e-05
UV8b_2090	[locus_tag=UV8b_2090] [protein=polyketide synthase] [protein_id=KDB16998.1] [location=complement(join(326885..328068,328153..328510))] [gbkey=CDS] - [JHTR01000008.1_prot_KDB16998.1_2090]	165.949	16.18	1	7	7	23	0.746816	0.758069	0.719136	1.25571	1.32606	1.18642	513	56.6561	5.79541	1.69432	0.000253113
UV8b_5056	[locus_tag=UV8b_5056] [protein=polyketide synthase] [protein_id=KDB14067.1] [location=complement(join(222602..224127,224232..228657,228733..229082,229141..229381,229443..229645,229714..229807,229858..229920,230001..230057,230114..230284))] [gbkey=CDS] - [JHTR01000026.1_prot_KDB14067.1_5056]	0	0.59	1	1	2	3	0.692829	0.728761	0.811972	1.14644	1.39632	1.41985	2376	257.519	6.31592	1.77412	0.00363193
UV8b_2087	[locus_tag=UV8b_2087] [protein=hypothetical protein] [protein_id=KDB16995.1] [location=join(319504..319656,319790..320059)] [gbkey=CDS] - [JHTR01000008.1_prot_KDB16995.1_2087]	40.3817	13.57	1	2	2	4	0.729407	0.729172	0.728071	1.22818	1.37422	1.37734	140	15.8375	5.96045	1.82002	0.00026365
UV8b_5605	[locus_tag=UV8b_5605] [protein=methyltransferase] [protein_id=KDB13507.1] [location=143535..144587] [gbkey=CDS] - [JHTR01000031.1_prot_KDB13507.1_5605]	202.833	17.14	1	6	6	14	0.681231	0.69881	0.769147	1.14049	1.45251	1.33833	350	38.7424	5.75732	1.82922	0.00333764
UV8b_337	[locus_tag=UV8b_337] [protein=uracil permease] [protein_id=KDB18946.1] [location=complement(join(1121015..1122288,1122429..1122738,1122812..1122895))] [gbkey=CDS] - [JHTR01000001.1_prot_KDB18946.1_337]	37.55	5.77	1	2	2	2	0.702307	0.719645	0.706894	1.26329	1.3288	1.36479	555	61.246	8.49951	1.8587	3.54284e-05
UV8b_2089	[locus_tag=UV8b_2089] [protein=ERG4/ERG24 ergosterol biosynthesis-like protein] [protein_id=KDB16997.1] [location=join(324856..325611,325685..325750)] [gbkey=CDS] - [JHTR01000008.1_prot_KDB16997.1_2089]	174.709	25.27	1	7	7	18	0.708009	0.704392	0.70034	1.24364	1.48	1.27482	273	30.1886	9.08545	1.89254	0.00106265
UV8b_4881	[locus_tag=UV8b_4881] [protein=hypothetical protein] [protein_id=KDB14286.1] [location=328347..328718] [gbkey=CDS] - [JHTR01000024.1_prot_KDB14286.1_4881]	0	4.88	1	1	1	1	0.708939	0.708422	0.702445	1.37004	1.38093	1.28414	123	12.9405	9.36377	1.90353	3.15194e-05
UV8b_5446	[locus_tag=UV8b_5446] [protein=IDI-2 precursor] [protein_id=KDB13614.1] [location=70248..70649] [gbkey=CDS] - [JHTR01000030.1_prot_KDB13614.1_5446]	28.18	12.78	1	2	2	3	0.660768	0.703926	0.76972	1.19793	1.49919	1.37996	133	13.7422	7.82568	1.91016	0.00224937
UV8b_7685	[locus_tag=UV8b_7685] [protein=hypothetical protein] [protein_id=KDB11462.1] [location=complement(join(87847..88086,88152..88239,88294..88430,88487..88558,88627..88830))] [gbkey=CDS] - [JHTR01000068.1_prot_KDB11462.1_7685]	62.545	3.66	1	1	1	2	0.644696	0.676314	0.646625	1.38943	1.40634	1.41013	246	26.445	7.06396	2.13754	4.07442e-07
UV8b_2088	[locus_tag=UV8b_2088] [protein=major facilitator superfamily transporter] [protein_id=KDB16996.1] [location=complement(join(320659..322113,322314..322583))] [gbkey=CDS] - [JHTR01000008.1_prot_KDB16996.1_2088]	137.798	10.8	1	6	6	8	0.571956	0.58179	0.575205	1.36946	1.60144	1.52621	574	61.597	6.29053	2.60106	0.000174661
